# Supplementary material for: Operon mRNAs are organized into ORF-centric structures that predict translation efficiency
Source: eLife journal article supplement (doi:10.7554/elife.22037), 2017-01-31
Supplement: supp [file elife-22037-supp-v1.zip]

Archive with 11 entries (11 files):
- elife_poa_e22037_Figure_3_figure_supplement_1.pdf
- elife_poa_e22037_Supplementary_File_2.xlsx
- elife_poa_e22037_Figure_6_figure_supplement_1.pdf
- elife_poa_e22037_Figure_5_figure_supplement_1.pdf
- elife_poa_e22037_Supplementary_File_3.xlsx
- elife_poa_e22037_Supplementary_File_4.xlsx
- elife_poa_e22037_Figure_2_figure_supplement_1.pdf
- elife_poa_e22037_Figure_4_figure_supplement_1.pdf
- elife_poa_e22037_Supplementary_File_1.xlsx
- elife_poa_e22037_Figure_4_figure_supplement_2.pdf
- elife_poa_e22037_Figure_4_figure_supplement_3.docx
