# Supplementary material for: Operon mRNAs are organized into ORF-centric structures that predict translation efficiency
Source: eLife journal article supplement (doi:10.7554/elife.22037), 2017-01-31
Supplement: supp [file elife-22037-supp-v1.zip › elife_poa_e22037_Figure_4_figure_supplement_2.pdf]

Figure 4 - figure supplement 2

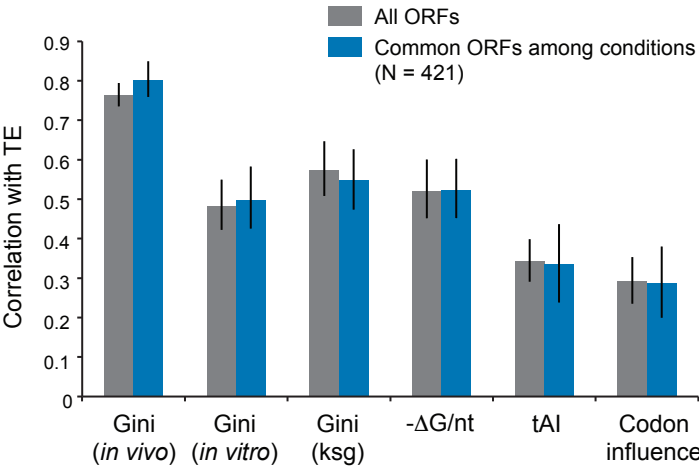

| Correlation 1                 | Spearman's ρ 1 | Correlation 2         | Spearman's ρ 2 | p-value    |
|-------------------------------|----------------|-----------------------|----------------|------------|
| Gini( <i>in vivo</i> ) vs TE  | 0.80           | tAI vs TE             | 0.34           | <2.2e-16 * |
| Gini( <i>in vitro</i> ) vs TE | 0.50           | tAI vs TE             | 0.34           | <2.2e-16 * |
| Gini(Ksg) vs TE               | 0.55           | tAI vs TE             | 0.34           | <2.2e-16 * |
| -ΔG/nt vs TE                  | 0.52           | tAI vs TE             | 0.34           | <2.2e-16 * |
| Gini( <i>in vivo</i> ) vs TE  | 0.80           | Codon influence vs TE | 0.29           | <2.2e-16 * |
| Gini( <i>in vitro</i> ) vs TE | 0.50           | Codon influence vs TE | 0.29           | <2.2e-16 * |
| Gini(Ksg) vs TE               | 0.55           | Codon influence vs TE | 0.29           | <2.2e-16 * |
| -ΔG/nt vs TE                  | 0.52           | Codon influence vs TE | 0.34           | <2.2e-16 * |
