# Supplementary material for: Operon mRNAs are organized into ORF-centric structures that predict translation efficiency
Source: eLife journal article supplement (doi:10.7554/elife.22037), 2017-01-31
Supplement: supp [file elife-22037-supp-v1.zip › elife_poa_e22037_Supplementary_File_1.xlsx]

## Sheet: Sheet1
Supplementary File 1: In vivo data summary (N = 1116)
ID	ID number set by authors indicating gene location on chromosome
Gene	Gene name
bNums	b number
Length	ORF length from the first base of start codon to the last base of stop codon
TE	Translation efficiency of the ORF (average ribosome density/mRNA abundance)
Ribosome	Average ribosome density of the ORF (see materials and methods for definition)
mRNA	mRNA abundance of the ORF (see materials and methods for definition)
Gini_mRNA	Gini calculated from WT mRNA-seq signals of the ORF (to eliminate ORFs with intragenic promoters)
-ΔG/nt	- mRNA free energy per nucleotide calculated from ViennaRNA
Mean_DMS_vivo	Mean of in vivo WT DMS-seq signals of the ORF
Gini_vivo	Gini of the full-length ORF calculated from DMS-seq of in vivo WT cells
Gini_vivo_1	Gini of the first half of the ORF calculated from DMS-seq of in vivo WT cells
Gini_vivo_2	Gini of the second half of the ORF calculated from DMS-seq of in vivo WT cells
Gini_vivo_-20:40	Gini calculated from WT in vivo DMS-seq signals in the region from 20nt upstream to 40nt downstream of ORF start codon
Gini_vivo_0:60	Gini calculated from WT in vivo DMS-seq signals in the region from the first base of start codon to 60nt downstream
Gini_vivo_0:100	Gini calculated from WT in vivo DMS-seq signals in the region from the first base of start codon to 100nt downstream
Gini_vivo_head	Gini calculated from WT in vivo DMS-seq signals in the region from the 20nt upstream to 60nt downstream of start codon
Gini_vivo_body	Gini calculated from WT in vivo DMS-seq signals in the region from 60nt downstream of start codon to the stop codon of ORF
tAI	tRNA adaptation index of the gene (Tuller et al., 2010; dos Reis et al., 2004)
Boel_multiple	Codon influence of the ORF calculated from the multiple parameter regression model in (Boel et al, 2016)
aSD	Strength of Shine-Dalgarno sequence (Salis et al., 2009)
ORF_distance	Distance (nt) between the first base of start codon and the last base of the upstream stop codon
ORF selection criteria for in vivo dataset:
1. Mean_DMS_vivo ≥ 15
2. Length ≥ 150
3. Gini_mRNA < 0.45 (to select genes with relatively constant mRNA level across ORFs, i.e. without internal promoter ors terminators)
ID	Gene	bNums	Length	TE	Ribosome	mRNA	Gini_mRNA	-ΔG/nt	Mean_DMS_vivo	Gini_vivo	Gini_vivo_1	Gini_vivo_2	Gini_vivo_-20:40	Gini_vivo_0:60	Gini_vivo_0:100	Gini_vivo_head	Gini_vivo_body	tAI	Boel_multiple	aSD	ORF_distance
2	thrA	b0002	2462	0.743	546.198	734.879	0.26	0.376	51.891	0.464	0.467	0.425	0.303	0.362	0.405	0.352	0.456	0.23	3.979	-8.481	82
3	thrB	b0003	932	0.485	279.979	577.646	0.26	0.421	41.117	0.485	0.466	0.5	0.464	0.537	0.51	0.471	0.48	0.215	3.545	-7.781	2
4	thrC	b0004	1286	0.939	650.095	692.543	0.231	0.375	65.671	0.427	0.417	0.436	0.252	0.278	0.306	0.265	0.435	0.231	4.459	-3.581	1
6	talB	b0008	953	2.532	1397.74	551.98	0.187	0.362	186.737	0.389	0.372	0.407	0.347	0.327	0.359	0.334	0.391	0.278	4.316	-3.481	2708
7	mog	b0009	587	1.528	212.46	139.009	0.316	0.369	24.345	0.415	0.411	0.417	0.369	0.419	0.414	0.418	0.413	0.234	4.525	-3.581	115
8	dnaK	b0014	1916	1.863	4612.68	2475.33	0.189	0.346	377.208	0.396	0.404	0.388	0.357	0.366	0.382	0.35	0.396	0.288	5.369	-6.181	2270
9	dnaJ	b0015	1130	0.838	560.577	668.987	0.221	0.376	78.514	0.438	0.439	0.437	0.386	0.387	0.441	0.373	0.44	0.255	5.153	-6.881	89
14	ribF	b0025	941	0.328	82.163	250.6	0.267	0.387	42.574	0.51	0.445	0.555	0.477	0.398	0.459	0.453	0.516	0.23	3.772	-2.881	8
15	ileS	b0026	2816	1.097	581.498	529.969	0.236	0.406	51.878	0.444	0.436	0.452	0.314	0.388	0.403	0.354	0.444	0.263	4.338	-2.881	43
16	lspA	b0027	494	0.185	94.317	508.793	0.244	0.413	39.172	0.468	0.495	0.442	0.388	0.47	0.517	0.435	0.46	0.237	2.06	-2.181	0
17	fkpB	b0028	449	0.578	112.62	194.939	0.262	0.375	25.756	0.498	0.494	0.494	0.344	0.448	0.481	0.392	0.506	0.244	5.195	-2.881	125
18	ispH	b0029	950	0.601	116.257	193.556	0.304	0.392	24.587	0.479	0.478	0.478	0.469	0.472	0.467	0.471	0.478	0.267	4.598	-9.481	2
20	dapB	b0031	821	1.096	170.888	155.852	0.343	0.391	25.382	0.446	0.438	0.451	0.375	0.448	0.462	0.417	0.445	0.221	5.252	-2.881	167
31	folA	b0048	479	1.32	223.061	168.987	0.303	0.377	36.288	0.458	0.472	0.429	0.408	0.499	0.519	0.47	0.451	0.237	4.799	-3.581	192
32	djlA	b0055	815	0.755	57.524	76.207	0.41	0.374	17.077	0.434	0.468	0.398	0.413	0.487	0.482	0.461	0.43	0.246	3.634	-5.281	7062
42	fruR	b0080	1004	0.831	93.637	112.73	0.366	0.378	17.779	0.48	0.479	0.461	0.405	0.477	0.438	0.447	0.472	0.226	3.937	-7.781	180
43	mraZ	b0081	458	0.094	35.041	374.393	0.272	0.35	52.168	0.535	0.533	0.535	0.427	0.455	0.509	0.476	0.548	0.204	3.28	-9.981	602
45	ftsL	b0083	365	0.275	66.01	240.41	0.382	0.367	35.137	0.555	0.608	0.426	0.439	0.506	0.541	0.493	0.501	0.189	4.443	-7.281	-3
47	murE	b0085	1487	0.552	151.209	273.98	0.297	0.421	33.13	0.5	0.522	0.472	0.491	0.648	0.613	0.569	0.493	0.227	4.796	-7.881	-13
48	murF	b0086	1358	0.56	109.782	195.899	0.291	0.388	22.322	0.461	0.447	0.467	0.417	0.404	0.377	0.425	0.464	0.241	4.247	-10.281	-3
49	mraY	b0087	1082	0.281	49.601	176.538	0.305	0.391	20.744	0.454	0.448	0.456	0.294	0.359	0.435	0.369	0.458	0.252	2.567	-7.781	-6
50	murD	b0088	1316	0.606	135.544	223.587	0.29	0.4	26.115	0.47	0.472	0.466	0.32	0.405	0.51	0.364	0.473	0.239	4.579	-4.281	3
51	ftsW	b0089	1244	0.189	26.736	141.759	0.343	0.396	17.338	0.513	0.495	0.529	0.519	0.583	0.581	0.535	0.508	0.245	2.377	-8.681	0
52	murG	b0090	1067	0.478	66.453	139.068	0.316	0.417	18.844	0.485	0.47	0.495	0.356	0.425	0.473	0.421	0.486	0.212	3.8	-7.881	-3
53	murC	b0091	1475	0.944	156.316	165.622	0.319	0.393	26.783	0.455	0.456	0.454	0.302	0.385	0.414	0.355	0.458	0.237	4.551	-1.681	54
54	ddlB	b0092	920	0.67	120.624	179.902	0.299	0.386	31.246	0.473	0.484	0.458	0.469	0.516	0.526	0.456	0.47	0.227	4.462	-9.481	-7
55	ftsQ	b0093	830	0.17	33.355	196.267	0.318	0.385	28.167	0.504	0.506	0.501	0.369	0.477	0.533	0.451	0.508	0.23	3.939	-4.981	2
56	ftsA	b0094	1262	0.51	158.766	311.487	0.319	0.385	41.33	0.485	0.457	0.507	0.312	0.33	0.401	0.34	0.49	0.224	4.36	-3.981	-3
57	ftsZ	b0095	1151	1.002	630.035	628.962	0.239	0.386	81.826	0.426	0.414	0.435	0.371	0.435	0.457	0.428	0.426	0.263	5.003	-6.181	61
58	lpxC	b0096	917	0.449	585.618	1303.74	0.227	0.371	209.328	0.486	0.48	0.479	0.404	0.448	0.479	0.431	0.476	0.249	4.199	-2.881	101
59	secM	b0097	512	0.333	92.086	276.203	0.257	0.351	43.99	0.508	0.513	0.499	0.439	0.494	0.532	0.504	0.508	0.194	3.28	-5.681	231
60	secA	b0098	2705	1.344	471.501	350.883	0.254	0.366	65.157	0.416	0.412	0.419	0.304	0.36	0.348	0.368	0.417	0.285	4.7	-6.481	62
62	guaC	b0104	1043	1.531	199.813	130.542	0.318	0.356	26.634	0.428	0.406	0.447	0.308	0.371	0.395	0.359	0.431	0.228	4.332	-5.181	2011
65	pdhR	b0113	764	0.414	230.636	557.712	0.27	0.374	80.22	0.512	0.522	0.465	0.394	0.438	0.472	0.407	0.509	0.223	4.273	-4.581	1957
66	aceE	b0114	2663	1.109	4408.44	3976	0.187	0.366	450.015	0.408	0.387	0.405	0.279	0.348	0.356	0.315	0.408	0.281	4.24	-7.381	161
67	aceF	b0115	1892	1.13	3889.68	3443.07	0.204	0.405	323.064	0.463	0.48	0.445	0.314	0.397	0.411	0.361	0.464	0.273	4.902	-7.881	15
68	lpd	b0116	1424	1.18	3410.31	2889.36	0.212	0.362	407.933	0.415	0.398	0.431	0.246	0.324	0.35	0.292	0.418	0.284	4.898	-7.881	325
69	acnB	b0118	2597	1.143	690.914	604.592	0.221	0.391	66.806	0.429	0.421	0.437	0.396	0.398	0.396	0.392	0.428	0.27	4.452	-7.781	2279
70	yacL	b0119	362	0.943	141.691	150.251	0.371	0.34	23	0.424	0.382	0.462	0.342	0.355	0.341	0.347	0.433	0.266	5.616	-6.181	176
72	hpt	b0125	536	1.429	678.866	474.906	0.247	0.349	115.994	0.393	0.398	0.385	0.289	0.353	0.345	0.332	0.4	0.283	4.763	-3.381	2798
79	mrcB	b0149	2534	0.432	37.488	86.839	0.378	0.406	16.08	0.498	0.465	0.529	0.484	0.574	0.543	0.514	0.496	0.251	3.921	-6.181	196
80	fhuA	b0150	2243	1.207	172.418	142.842	0.32	0.363	30.324	0.435	0.417	0.45	0.338	0.436	0.458	0.375	0.434	0.237	4.194	-2.881	220
85	erpA	b0156	344	1.581	1152.89	729.115	0.214	0.3	107.507	0.406	0.371	0.44	0.356	0.341	0.356	0.341	0.417	0.265	5.4	-6.181	82
87	degP	b0161	1424	2.328	236.391	101.521	0.329	0.381	17.301	0.429	0.432	0.424	0.334	0.338	0.399	0.334	0.432	0.271	4.027	-2.881	130
89	rpsB	b0169	725	1.401	11884.2	8479.64	0.171	0.339	1621.06	0.406	0.405	0.406	0.274	0.336	0.345	0.319	0.411	0.281	4.421	-7.881	6254
90	tsf	b0170	851	1.982	9456.35	4772.14	0.192	0.358	1075.47	0.403	0.394	0.411	0.314	0.365	0.358	0.354	0.405	0.296	5.076	-6.181	258
91	pyrH	b0171	725	0.843	474.738	563.249	0.223	0.367	79.835	0.444	0.447	0.44	0.341	0.404	0.391	0.366	0.447	0.283	4.282	-5.181	147
92	frr	b0172	557	1.256	2257.84	1798.01	0.176	0.337	337.935	0.436	0.406	0.455	0.349	0.395	0.375	0.367	0.437	0.303	5.571	-6.081	292
94	ispU	b0174	761	0.314	102.75	326.811	0.288	0.36	56.316	0.482	0.482	0.471	0.378	0.47	0.475	0.435	0.482	0.197	3.93	-5.781	186
95	cdsA	b0175	857	0.206	47.766	231.8	0.296	0.373	33.393	0.448	0.454	0.441	0.311	0.409	0.496	0.379	0.45	0.199	1.886	-10.281	13
96	rseP	b0176	1352	0.144	36.695	254.179	0.361	0.383	37.899	0.544	0.479	0.554	0.408	0.519	0.498	0.487	0.544	0.21	3.38	-7.381	12
97	bamA	b0177	2432	0.857	396.135	462.464	0.25	0.371	71.285	0.451	0.45	0.451	0.389	0.472	0.512	0.43	0.451	0.25	4.721	-5.181	30
98	skp	b0178	485	1.506	1987.37	1319.98	0.214	0.358	269.381	0.412	0.398	0.423	0.255	0.34	0.343	0.329	0.419	0.287	4.304	-9.981	122
99	lpxD	b0179	1025	0.367	378.136	1029.55	0.236	0.379	158.086	0.48	0.487	0.468	0.366	0.44	0.539	0.395	0.481	0.246	3.666	-3.281	4
100	fabZ	b0180	455	1.527	1413.13	925.344	0.21	0.34	222.857	0.402	0.378	0.421	0.269	0.36	0.384	0.344	0.408	0.258	4.163	-5.181	105
101	lpxA	b0181	788	0.185	229.727	1240.58	0.203	0.399	163.013	0.552	0.524	0.574	0.465	0.546	0.52	0.521	0.551	0.237	4.475	-9.481	4
102	lpxB	b0182	1148	0.205	38.018	185.657	0.379	0.404	27.077	0.515	0.526	0.496	0.571	0.603	0.571	0.581	0.494	0.225	3.966	-1.681	0
103	rnhB	b0183	596	0.435	70.986	163.002	0.283	0.407	18.025	0.5	0.502	0.497	0.48	0.482	0.471	0.454	0.498	0.229	5.062	-6.181	-3
105	accA	b0185	959	0.917	739.232	805.812	0.217	0.361	142.783	0.411	0.399	0.418	0.313	0.362	0.417	0.317	0.414	0.269	4.837	-3.281	13
112	gmhB	b0200	575	1.427	125.394	87.891	0.396	0.354	22.613	0.448	0.463	0.43	0.438	0.496	0.459	0.479	0.442	0.226	5.104	-9.981	6854
117	dnaQ	b0215	731	1.107	85.654	77.345	0.359	0.353	15.985	0.414	0.44	0.386	0.424	0.406	0.392	0.412	0.414	0.205	5.171	0.319	529
121	lpcA	b0222	578	1.161	345.431	297.454	0.29	0.348	59.927	0.402	0.395	0.408	0.299	0.314	0.351	0.33	0.409	0.257	4.393	-6.081	2727
132	gpt	b0238	458	4.003	1171.35	292.602	0.217	0.341	112.61	0.359	0.338	0.38	0.27	0.267	0.292	0.277	0.372	0.242	4.79	-3.581	1772
134	crl	b0240	401	4.854	974.835	200.818	0.224	0.34	79.289	0.404	0.387	0.419	0.363	0.294	0.321	0.371	0.422	0.22	4.654	-7.781	58
135	proB	b0242	1103	0.881	192.538	218.593	0.27	0.401	27.433	0.448	0.448	0.442	0.346	0.396	0.422	0.371	0.447	0.233	4.215	-2.381	1382
136	proA	b0243	1253	0.894	238.944	267.402	0.301	0.394	30.817	0.457	0.479	0.434	0.446	0.527	0.523	0.481	0.452	0.251	4.313	-9.981	12
141	mmuP	b0260	1403	0.525	40.685	77.53	0.353	0.389	22.557	0.421	0.414	0.425	0.293	0.28	0.291	0.292	0.431	0.208	2.412	-5.981	1368
142	mmuM	b0261	932	0.853	81.421	95.424	0.356	0.442	24.658	0.513	0.504	0.514	0.376	0.461	0.443	0.411	0.514	0.199	4.277	-7.781	-13
175	codA	b0337	1283	1.222	87.223	71.371	0.376	0.365	16.696	0.436	0.451	0.409	0.321	0.414	0.433	0.395	0.437	0.238	4.118	-9.481	-10
204	aroL	b0388	524	0.571	47.859	83.778	0.408	0.34	16.09	0.462	0.481	0.436	0.416	0.45	0.464	0.459	0.449	0.212	4.118	-6.681	183
207	yaiE	b0391	284	3.621	193.619	53.477	0.357	0.341	22.196	0.418	0.396	0.371	0.345	0.277	0.329	0.339	0.445	0.215	4.639	-3.281	72
212	brnQ	b0401	1319	0.779	175.249	225.101	0.267	0.391	38.095	0.433	0.432	0.433	0.358	0.349	0.41	0.356	0.435	0.232	2.538	-3.981	407
213	proY	b0402	1373	0.502	60.546	120.577	0.325	0.391	18.952	0.445	0.445	0.444	0.373	0.435	0.438	0.418	0.445	0.256	2.223	-3.881	76
215	queA	b0405	1070	1.532	171.358	111.839	0.395	0.365	22.91	0.434	0.428	0.441	0.327	0.301	0.319	0.329	0.441	0.243	4.984	-2.881	679
216	tgt	b0406	1127	0.92	645.403	701.906	0.26	0.36	141.918	0.451	0.428	0.449	0.434	0.473	0.483	0.471	0.449	0.235	4.155	-5.881	56
217	yajC	b0407	332	1.985	2518.16	1268.76	0.23	0.325	308.12	0.404	0.409	0.398	0.217	0.368	0.397	0.331	0.408	0.289	4.602	-6.781	23
218	secD	b0408	1847	0.266	174.882	657.395	0.267	0.38	103.692	0.5	0.52	0.473	0.41	0.482	0.531	0.477	0.49	0.263	3.698	-5.481	28
219	secF	b0409	971	0.282	162.286	575.703	0.234	0.379	88.452	0.486	0.473	0.496	0.376	0.432	0.442	0.432	0.489	0.252	3.343	-10.081	11
221	nrdR	b0413	449	0.515	86.424	167.833	0.308	0.341	31.429	0.483	0.52	0.448	0.494	0.48	0.486	0.534	0.482	0.26	4.287	-5.181	2050
222	ribD	b0414	1103	0.548	87.417	159.388	0.334	0.386	21.664	0.483	0.462	0.474	0.436	0.382	0.422	0.421	0.487	0.221	3.981	-9.481	4
223	ribE	b0415	470	1.49	692.981	465.096	0.279	0.351	94.951	0.408	0.408	0.405	0.363	0.444	0.38	0.41	0.402	0.255	4.957	-3.481	89
224	nusB	b0416	419	0.816	495.85	607.377	0.209	0.377	107.183	0.451	0.449	0.451	0.405	0.419	0.431	0.411	0.451	0.282	4.05	-9.081	20
226	pgpA	b0418	518	0.262	27.337	104.511	0.369	0.377	15.921	0.491	0.487	0.468	0.458	0.486	0.52	0.478	0.475	0.22	2.412	-4.081	-22
227	thiI	b0423	1448	1.388	266.335	191.936	0.282	0.364	41.535	0.435	0.441	0.426	0.306	0.331	0.333	0.347	0.436	0.263	4.526	-0.281	4442
228	yajQ	b0426	491	1.705	1276.4	748.633	0.222	0.341	166.764	0.381	0.395	0.366	0.447	0.384	0.413	0.427	0.379	0.271	5.054	-8.381	1686
229	bolA	b0435	317	1.125	129.7	115.315	0.358	0.326	28.588	0.398	0.388	0.404	0.34	0.396	0.383	0.4	0.398	0.19	3.804	-9.481	9298
230	tig	b0436	1298	1.854	6246.28	3369.9	0.198	0.35	801.205	0.413	0.413	0.407	0.323	0.334	0.366	0.32	0.415	0.308	5.874	-7.881	344
231	clpP	b0437	623	1.186	615.161	518.519	0.227	0.349	85.436	0.39	0.394	0.385	0.298	0.355	0.397	0.341	0.387	0.244	4.002	-7.781	246
232	clpX	b0438	1274	0.636	528.954	831.871	0.218	0.38	113.1	0.464	0.463	0.464	0.294	0.329	0.389	0.323	0.47	0.264	5.158	-7.881	126
233	lon	b0439	2354	0.731	548.193	750.352	0.236	0.378	102.778	0.469	0.479	0.456	0.303	0.38	0.41	0.344	0.47	0.271	4.777	-6.181	188
234	hupB	b0440	272	2.261	6902.14	3052.45	0.193	0.301	690.656	0.385	0.357	0.391	0.244	0.266	0.355	0.265	0.406	0.254	4.595	-6.781	209
235	ppiD	b0441	1871	0.626	206.344	329.723	0.254	0.355	76.365	0.407	0.402	0.412	0.362	0.336	0.413	0.336	0.409	0.276	4.909	-7.381	192
249	apt	b0469	551	1.913	1150.43	601.284	0.2	0.365	130.348	0.397	0.389	0.403	0.281	0.268	0.304	0.284	0.412	0.27	4.612	-5.181	153
250	dnaX	b0470	1931	0.342	54.854	160.27	0.377	0.421	23.417	0.559	0.509	0.592	0.371	0.428	0.418	0.439	0.563	0.228	4.311	-2.881	129
251	ybaB	b0471	329	2.184	1685.64	771.852	0.206	0.308	161.133	0.37	0.345	0.393	0.359	0.344	0.319	0.345	0.373	0.353	5.08	-6.281	53
252	recR	b0472	605	0.127	85.537	672.677	0.22	0.434	90.632	0.539	0.568	0.507	0.402	0.486	0.582	0.472	0.541	0.229	4.008	-3.181	0
253	htpG	b0473	1874	1.574	1105.74	702.474	0.208	0.36	100.409	0.409	0.405	0.411	0.329	0.43	0.435	0.393	0.408	0.284	4.994	-7.881	110
254	adk	b0474	644	2.732	2098.77	768.077	0.218	0.334	190.696	0.378	0.365	0.384	0.36	0.329	0.309	0.338	0.38	0.287	5.306	-9.081	181
256	gsk	b0477	1304	1.612	174.964	108.509	0.33	0.361	23.775	0.42	0.389	0.439	0.421	0.356	0.412	0.425	0.424	0.245	4.405	1.619	1108
258	ybaQ	b0483	341	0.935	68.567	73.35	0.396	0.27	20.468	0.391	0.35	0.435	0.31	0.361	0.375	0.356	0.395	0.229	4.688	-0.881	1652
272	allR	b0506	815	1.348	162.202	120.335	0.365	0.377	20.18	0.444	0.445	0.442	0.475	0.475	0.441	0.465	0.441	0.216	3.807	-6.181	78
285	cysS	b0526	1385	1.143	337.229	295.092	0.258	0.369	54.944	0.404	0.392	0.415	0.292	0.324	0.33	0.347	0.408	0.262	4.817	-3.581	3279
321	pheP	b0576	1376	0.4	39.454	98.575	0.334	0.382	16.736	0.452	0.469	0.431	0.475	0.516	0.496	0.49	0.448	0.244	2.504	-6.881	102
336	ybdL	b0600	1160	1.513	88.869	58.727	0.373	0.386	23.898	0.434	0.403	0.465	0.348	0.277	0.337	0.314	0.444	0.206	3.823	-4.981	1207
337	ahpC	b0605	563	2.592	8331.33	3214.11	0.206	0.315	643.55	0.358	0.345	0.37	0.281	0.217	0.303	0.267	0.366	0.29	4.582	-9.481	4199
338	ahpF	b0606	1565	1.327	590.966	445.422	0.235	0.364	56.384	0.402	0.394	0.407	0.352	0.308	0.326	0.347	0.405	0.27	4.648	-7.781	245
343	cspE	b0623	209	3.139	23170.8	7380.79	0.177	0.278	2119.24	0.377	0.39	0.362	0.289	0.354	0.39	0.339	0.382	0.245	3.384	-4.981	175
346	tatE	b0627	203	1.939	360.234	185.737	0.339	0.316	35.603	0.437	0.422	0.441	0.303	0.38	0.422	0.339	0.448	0.224	5.745	-6.881	126
354	glnS	b0680	1664	1.207	676.058	560.155	0.214	0.369	86.851	0.43	0.422	0.432	0.425	0.389	0.37	0.421	0.431	0.265	4.429	-7.481	203
357	seqA	b0687	545	1.097	473.948	432.041	0.248	0.323	70.592	0.405	0.434	0.373	0.289	0.346	0.411	0.313	0.411	0.224	3.595	-1.681	2871
358	pgm	b0688	1640	0.82	314.83	383.946	0.258	0.394	54.197	0.482	0.473	0.481	0.421	0.457	0.427	0.43	0.483	0.261	4.338	-6.081	26
376	sdhC	b0721	389	2.08	277.633	133.453	0.284	0.312	32.759	0.384	0.358	0.407	0.237	0.262	0.312	0.262	0.404	0.227	2.214	-3.781	8451
377	sdhD	b0722	347	1.121	295.024	263.07	0.258	0.333	29.523	0.393	0.377	0.409	0.334	0.337	0.373	0.339	0.402	0.24	2.157	-7.781	-6
378	sdhA	b0723	1766	0.836	294.436	352.393	0.257	0.417	39.765	0.448	0.451	0.444	0.134	0.269	0.358	0.269	0.452	0.258	4.537	-6.981	0
379	sdhB	b0724	716	1.185	354.699	299.247	0.257	0.356	41.936	0.42	0.402	0.434	0.283	0.343	0.34	0.329	0.426	0.228	3.595	-6.181	16
380	sucA	b0726	2801	0.629	278.688	442.994	0.249	0.387	30.706	0.48	0.451	0.49	0.389	0.499	0.47	0.455	0.474	0.258	4.127	-5.481	301
381	sucB	b0727	1217	1.214	750.325	618.027	0.226	0.4	51.952	0.435	0.426	0.431	0.302	0.429	0.412	0.377	0.434	0.287	5.16	-6.081	15
382	sucC	b0728	1166	1.031	403.665	391.402	0.251	0.38	38.632	0.425	0.412	0.433	0.271	0.341	0.376	0.305	0.429	0.285	4.692	-8.181	275
383	sucD	b0729	869	1.216	402.806	331.357	0.251	0.368	46.038	0.429	0.409	0.433	0.318	0.302	0.293	0.322	0.436	0.267	4.234	-9.481	0
386	cydA	b0733	1568	0.585	116.18	198.669	0.248	0.376	29.258	0.449	0.461	0.433	0.384	0.371	0.422	0.396	0.451	0.255	3.072	-8.681	847
387	cydB	b0734	1139	0.373	88.643	237.743	0.26	0.371	27.657	0.451	0.455	0.444	0.289	0.339	0.357	0.333	0.454	0.268	2.461	-7.781	16
389	ybgE	b0735	293	0.235	25.839	109.775	0.346	0.352	15.83	0.586	0.572	0.551	0.467	0.621	0.601	0.552	0.557	0.195	1.755	-1.881	0
390	ybgC	b0736	404	0.406	103.921	256.063	0.278	0.343	38.919	0.48	0.482	0.47	0.432	0.462	0.496	0.435	0.472	0.209	3.256	-3.781	150
391	tolQ	b0737	692	0.64	126.931	198.225	0.278	0.335	43.717	0.417	0.432	0.396	0.427	0.438	0.408	0.455	0.413	0.238	3.552	-6.181	-3
392	tolR	b0738	428	0.374	101.278	271.011	0.315	0.389	39.438	0.441	0.441	0.439	0.467	0.456	0.453	0.428	0.434	0.221	3.925	-8.681	4
393	tolA	b0739	1265	0.387	58.548	151.438	0.368	0.368	37.485	0.504	0.478	0.526	0.366	0.423	0.471	0.399	0.508	0.253	5.304	-3.581	65
394	tolB	b0740	1292	1.027	642.108	625.516	0.409	0.38	134.261	0.504	0.397	0.556	0.355	0.33	0.362	0.364	0.511	0.232	3.44	-6.981	133
395	pal	b0741	521	1.883	4191.3	2226.42	0.175	0.327	542.496	0.401	0.413	0.386	0.289	0.365	0.386	0.333	0.389	0.306	3.782	-6.081	35
396	ybgF	b0742	791	0.511	350.487	685.794	0.313	0.368	152.967	0.478	0.502	0.452	0.381	0.568	0.624	0.503	0.447	0.229	3.612	-2.881	10
397	nadA	b0750	1043	1.536	405.59	264.119	0.265	0.343	51.181	0.39	0.379	0.399	0.328	0.387	0.387	0.406	0.389	0.208	4.592	-4.081	1696
398	pnuC	b0751	719	0.509	114.997	225.72	0.271	0.357	32.528	0.389	0.366	0.408	0.345	0.306	0.303	0.344	0.395	0.22	1.573	-8.581	38
399	aroG	b0754	1052	2.014	508.293	252.417	0.274	0.357	54.166	0.389	0.351	0.423	0.247	0.298	0.318	0.281	0.394	0.24	4.09	-4.481	1748
404	pgl	b0767	995	1.885	245.765	130.351	0.312	0.372	18.524	0.415	0.392	0.435	0.322	0.355	0.342	0.333	0.418	0.227	4.648	-8.681	974
408	bioB	b0775	1040	1.493	526.325	352.544	0.247	0.361	55.685	0.397	0.402	0.389	0.344	0.341	0.349	0.34	0.4	0.258	4.16	-6.181	3580
409	bioF	b0776	1154	0.258	77.178	298.966	0.25	0.45	31.277	0.48	0.489	0.469	0.449	0.583	0.582	0.53	0.469	0.21	3.829	-1.681	-3
410	bioC	b0777	755	0.274	70.668	258.108	0.257	0.416	27.503	0.471	0.48	0.46	0.431	0.424	0.417	0.449	0.474	0.191	3.081	-11.181	-13
411	bioD	b0778	677	1.276	239.608	187.835	0.285	0.367	33.913	0.423	0.403	0.441	0.302	0.296	0.348	0.325	0.432	0.223	3.417	-6.181	-7
413	moaA	b0781	989	0.3	45.253	150.768	0.331	0.382	17.744	0.479	0.481	0.451	0.362	0.398	0.445	0.406	0.477	0.239	3.992	-5.781	1497
414	moaB	b0782	512	0.917	181.563	197.929	0.268	0.344	22.045	0.425	0.391	0.456	0.331	0.321	0.337	0.318	0.438	0.241	4.442	-8.681	22
415	moaC	b0783	485	0.822	168.442	204.853	0.302	0.413	27.953	0.469	0.465	0.453	0.377	0.446	0.449	0.406	0.472	0.248	5.002	-0.981	3
416	moaD	b0784	245	0.465	98.541	211.726	0.293	0.4	24.642	0.554	0.523	0.573	0.438	0.539	0.527	0.496	0.547	0.222	5.626	-9.081	-7
417	moaE	b0785	452	0.544	89.234	164.011	0.305	0.369	24.04	0.473	0.467	0.466	0.507	0.5	0.525	0.497	0.459	0.24	5.86	-11.181	2
418	ybhL	b0786	704	1.401	79.152	56.482	0.368	0.333	18.47	0.407	0.392	0.418	0.427	0.348	0.357	0.419	0.412	0.245	1.638	-7.781	137
421	rhlE	b0797	1364	0.967	92.69	95.815	0.374	0.388	18.232	0.458	0.432	0.483	0.395	0.478	0.456	0.481	0.458	0.264	4.36	-6.181	5832
424	ybiC	b0801	1085	1.26	135.545	107.579	0.316	0.399	16.576	0.418	0.415	0.413	0.355	0.345	0.333	0.35	0.419	0.21	4.174	-7.781	141
426	ompX	b0814	515	2.302	11141.4	4839.58	0.185	0.351	1202.18	0.331	0.317	0.343	0.31	0.323	0.315	0.33	0.332	0.269	3.494	-10.881	7192
428	mntR	b0817	467	0.914	102.541	112.242	0.38	0.347	16.568	0.432	0.411	0.446	0.352	0.371	0.384	0.353	0.44	0.223	4.367	-6.781	243
430	ybiT	b0820	1592	1.12	279.216	249.254	0.288	0.379	38.323	0.432	0.426	0.435	0.363	0.297	0.389	0.371	0.434	0.273	4.866	-5.181	1198
432	iaaA	b0828	965	0.235	8.371	35.563	0.409	0.409	19.112	0.538	0.503	0.558	0.401	0.468	0.515	0.462	0.541	0.233	4.586	-3.581	2264
446	nfsA	b0851	722	1.57	152.506	97.146	0.353	0.351	19.461	0.407	0.394	0.416	0.324	0.363	0.412	0.323	0.411	0.214	3.939	-2.881	-16
448	ybjN	b0853	476	0.582	103.904	178.6	0.301	0.333	23.488	0.413	0.43	0.394	0.402	0.441	0.418	0.44	0.405	0.215	3.911	-7.881	88
460	clpS	b0881	320	0.617	60.935	98.789	0.413	0.288	16.679	0.465	0.422	0.459	0.407	0.411	0.413	0.402	0.471	0.236	4.361	-0.281	620
461	clpA	b0882	2276	0.539	94.317	174.925	0.335	0.389	23.616	0.471	0.449	0.488	0.321	0.405	0.402	0.398	0.473	0.239	4.608	-11.181	31
462	lrp	b0889	494	1.397	651.219	466.06	0.238	0.334	92.966	0.394	0.406	0.379	0.267	0.344	0.355	0.293	0.402	0.233	3.947	-3.981	7055
463	ftsK	b0890	3989	0.475	61.227	128.947	0.343	0.384	17.787	0.461	0.448	0.473	0.291	0.366	0.403	0.357	0.462	0.224	4.293	-6.181	135
464	lolA	b0891	611	1.384	177.047	127.903	0.38	0.323	23.222	0.391	0.391	0.391	0.306	0.324	0.367	0.332	0.398	0.241	4.423	-7.481	159
466	serS	b0893	1292	1.501	1047.01	697.408	0.2	0.368	139.721	0.429	0.433	0.421	0.372	0.41	0.415	0.366	0.43	0.274	4.65	-4.181	91
474	serC	b0907	1088	1.345	390.524	290.437	0.271	0.349	56.4	0.403	0.405	0.4	0.333	0.337	0.332	0.341	0.404	0.238	3.798	-6.181	199
475	aroA	b0908	1283	0.949	101.709	107.192	0.358	0.351	17.967	0.437	0.438	0.435	0.391	0.394	0.419	0.371	0.439	0.239	4.077	-3.981	71
478	rpsA	b0911	1673	0.621	6418.06	10343.2	0.187	0.357	2061.8	0.428	0.431	0.425	0.263	0.408	0.456	0.347	0.429	0.298	5.237	-0.281	111
479	ihfB	b0912	284	1.953	1667.3	853.697	0.184	0.283	200.933	0.378	0.344	0.39	0.306	0.319	0.319	0.327	0.395	0.244	4.226	-9.481	160
481	msbA	b0914	1748	0.416	85.356	205.045	0.278	0.362	32.903	0.435	0.425	0.443	0.483	0.413	0.5	0.48	0.434	0.24	3.475	-3.381	37
482	lpxK	b0915	986	0.183	21.088	115.338	0.351	0.412	17.743	0.522	0.521	0.497	0.4	0.582	0.634	0.501	0.512	0.216	3.773	-0.181	-3
484	ycaR	b0917	182	2.12	559.176	263.764	0.251	0.259	52.47	0.344	0.319	0.369	0.478	0.334	0.312	0.427	0.344	0.23	4.075	-9.481	52
485	kdsB	b0918	746	0.907	273.598	301.778	0.276	0.357	47.6	0.442	0.443	0.441	0.422	0.489	0.454	0.443	0.437	0.229	4.721	-4.781	-3
487	smtA	b0921	785	0.276	44.721	162.271	0.311	0.349	24.971	0.451	0.471	0.428	0.45	0.453	0.428	0.485	0.451	0.227	4.203	-6.181	892
488	mukF	b0922	1322	0.487	78.526	161.237	0.368	0.383	20.105	0.475	0.477	0.469	0.397	0.381	0.471	0.37	0.478	0.25	4.624	-6.081	-3
489	mukE	b0923	677	0.59	130.311	220.887	0.32	0.364	24.389	0.448	0.468	0.415	0.4	0.514	0.477	0.475	0.439	0.258	4.865	-0.281	8
490	mukB	b0924	4460	0.522	116.542	223.088	0.285	0.403	27.088	0.468	0.475	0.461	0.398	0.444	0.429	0.429	0.468	0.253	4.86	-6.181	0
492	ycbK	b0926	548	1.25	183.415	146.696	0.273	0.329	31.843	0.42	0.416	0.41	0.319	0.413	0.467	0.37	0.42	0.22	3.44	0.019	181
493	ycbL	b0927	647	0.755	176.235	233.488	0.267	0.356	35.591	0.454	0.442	0.443	0.393	0.36	0.384	0.373	0.462	0.231	4.311	-5.281	27
494	pepN	b0932	2612	1.406	247.406	176.02	0.338	0.367	19.209	0.441	0.434	0.435	0.368	0.381	0.398	0.377	0.442	0.244	4.476	-4.981	6325
502	pyrD	b0945	1010	1.978	109.107	55.164	0.357	0.32	23.878	0.4	0.383	0.406	0.373	0.367	0.344	0.376	0.401	0.228	3.952	-8.981	111
504	rlmL	b0948	2108	1.096	190.472	173.822	0.299	0.385	21.092	0.455	0.458	0.425	0.347	0.38	0.45	0.355	0.455	0.249	3.873	0.019	1350
505	uup	b0949	1907	0.83	144.608	174.196	0.302	0.368	24.298	0.432	0.448	0.413	0.437	0.495	0.437	0.494	0.429	0.26	4.941	-6.081	12
529	gnsA	b4517	173	3.915	626.242	159.941	0.292	0.19	51.782	0.312	0.324	0.295	0.263	0.321	0.32	0.308	0.302	0.251	4.519	-7.881	-10
538	putP	b1015	1508	0.6	75.79	126.416	0.349	0.392	17.231	0.437	0.438	0.434	0.314	0.252	0.336	0.296	0.439	0.225	2.844	-6.181	4425
548	ycdX	b1034	737	0.907	73.746	81.35	0.335	0.324	18.78	0.394	0.384	0.403	0.344	0.316	0.342	0.334	0.401	0.204	4.41	-7.781	55
549	ycdY	b1035	554	1.554	255.976	164.747	0.304	0.382	26.054	0.426	0.371	0.467	0.334	0.382	0.379	0.341	0.425	0.209	4.26	-3.581	24
560	yceA	b1055	1052	1.788	442.024	247.273	0.27	0.346	41.055	0.397	0.392	0.395	0.348	0.381	0.368	0.377	0.398	0.212	3.783	-5.181	3001
577	rluC	b1086	959	1.091	240.585	220.562	0.319	0.375	42.202	0.441	0.47	0.408	0.741	0.634	0.578	0.724	0.424	0.237	4.456	0.019	118
578	yceD	b1088	521	0.095	532.897	5581.19	0.262	0.362	1128.16	0.588	0.536	0.543	0.411	0.421	0.449	0.451	0.593	0.223	5.303	0.419	895
579	rpmF	b1089	173	2.77	19807.8	7149.66	0.145	0.315	2083.4	0.404	0.414	0.386	0.287	0.348	0.402	0.335	0.424	0.296	3.009	-10.081	52
581	fabH	b1091	953	0.816	842.585	1032.11	0.234	0.394	129.265	0.466	0.467	0.462	0.4	0.422	0.451	0.393	0.465	0.23	4.401	-2.881	68
582	fabD	b1092	929	1.103	1360.46	1233.49	0.222	0.414	179.041	0.453	0.461	0.446	0.326	0.45	0.456	0.398	0.453	0.242	4.47	-7.381	16
583	fabG	b1093	734	0.574	1547.05	2694.17	0.306	0.384	498.137	0.544	0.436	0.536	0.308	0.431	0.427	0.381	0.548	0.255	4.29	-6.181	13
584	acpP	b1094	236	3.236	38379.7	11860.4	0.212	0.29	2913.91	0.359	0.312	0.4	0.285	0.288	0.309	0.27	0.376	0.256	6.896	-5.181	211
585	fabF	b1095	1241	0.53	1238.24	2337.3	0.217	0.399	380.714	0.496	0.489	0.501	0.437	0.473	0.516	0.468	0.496	0.246	4.118	-9.481	88
588	tmk	b1098	641	0.922	110.46	119.804	0.341	0.376	20.692	0.478	0.459	0.483	0.323	0.467	0.469	0.41	0.475	0.244	5.394	-7.381	-10
590	ycfH	b1100	797	1.306	133.971	102.609	0.357	0.341	18.712	0.441	0.422	0.455	0.348	0.387	0.45	0.366	0.442	0.228	5.102	-6.181	11
591	ptsG	b1101	1433	0.436	539.176	1236.46	0.204	0.382	276.218	0.45	0.446	0.449	0.319	0.381	0.455	0.349	0.452	0.257	2.925	-7.781	295
592	hinT	b1103	359	1.169	227.021	194.244	0.282	0.332	39.331	0.378	0.383	0.365	0.271	0.336	0.375	0.311	0.386	0.241	4.403	-6.081	2583
593	ycfL	b1104	377	0.116	17.057	147.032	0.293	0.353	27.743	0.537	0.556	0.486	0.38	0.435	0.488	0.397	0.536	0.198	3.588	-4.281	3
594	ycfM	b1105	641	0.741	112.852	152.336	0.288	0.38	26.469	0.433	0.442	0.423	0.388	0.424	0.431	0.417	0.427	0.225	3.293	-9.981	14
596	nagZ	b1107	1025	0.754	79.044	104.873	0.385	0.383	15.684	0.494	0.522	0.468	0.284	0.43	0.484	0.37	0.493	0.231	4.506	-9.981	11
597	ycfP	b1108	542	0.95	113.318	119.259	0.342	0.303	23.952	0.418	0.415	0.415	0.342	0.312	0.354	0.337	0.429	0.219	3.338	-6.181	23
598	ndh	b1109	1304	1.581	1074.83	679.998	0.229	0.352	118.924	0.389	0.378	0.401	0.389	0.391	0.355	0.371	0.388	0.253	3.981	-14.081	400
600	bhsA	b1112	257	8.577	258.027	30.084	0.369	0.286	37.527	0.388	0.356	0.416	0.337	0.357	0.376	0.353	0.395	0.232	4.646	-5.481	935
602	lolD	b1117	701	0.883	90.993	103.023	0.388	0.382	17.412	0.459	0.44	0.477	0.42	0.332	0.39	0.4	0.467	0.262	4.124	-5.581	-7
607	icd	b1136	1250	1.962	2597.54	1324.04	0.215	0.339	280.788	0.369	0.365	0.373	0.286	0.289	0.297	0.299	0.373	0.276	4.441	-8.681	8053
634	ycgL	b1179	326	1.617	193.984	119.95	0.361	0.293	28.911	0.407	0.43	0.387	0.567	0.472	0.451	0.517	0.39	0.217	3.841	-1.381	713
639	fadR	b1187	719	1.461	171.802	117.614	0.342	0.345	25.172	0.42	0.41	0.428	0.406	0.417	0.446	0.38	0.42	0.201	3.53	-3.581	2484
640	dadA	b1189	1298	0.951	172.594	181.473	0.313	0.404	20.212	0.457	0.451	0.45	0.459	0.443	0.439	0.46	0.456	0.233	4.08	-6.181	1914
642	emtA	b1193	611	0.971	137.176	141.273	0.357	0.361	24.953	0.451	0.437	0.46	0.326	0.387	0.406	0.359	0.455	0.219	3.236	-7.381	3231
648	prfA	b1211	1082	0.849	102.767	121.11	0.361	0.367	17.78	0.445	0.449	0.428	0.433	0.405	0.436	0.431	0.447	0.246	5.362	-4.181	42
651	ychA	b1214	809	0.336	39.262	116.847	0.35	0.344	22.923	0.479	0.467	0.482	0.385	0.485	0.498	0.442	0.478	0.218	4.246	-6.981	4
652	kdsA	b1215	854	1.307	468.662	358.633	0.252	0.366	59.112	0.417	0.416	0.416	0.352	0.39	0.421	0.383	0.41	0.25	4.672	-5.481	36
664	galU	b1236	908	1.571	845.631	538.417	0.227	0.325	127.022	0.369	0.356	0.379	0.31	0.313	0.371	0.319	0.373	0.236	5.288	-7.781	202
665	tdk	b1238	617	1.865	131.199	70.362	0.413	0.298	19.456	0.395	0.393	0.393	0.339	0.341	0.368	0.353	0.401	0.206	3.69	-5.581	1162
667	oppA	b1243	1631	1.881	1504.91	800.145	0.197	0.312	208.904	0.354	0.344	0.362	0.318	0.344	0.366	0.331	0.353	0.235	4.154	-8.381	738
668	oppB	b1244	920	0.472	130.408	276.442	0.266	0.324	60.327	0.402	0.398	0.403	0.444	0.421	0.425	0.421	0.399	0.216	1.809	-8.181	86
669	oppC	b1245	908	0.419	161.065	384.763	0.263	0.384	57.432	0.424	0.42	0.424	0.324	0.338	0.377	0.346	0.428	0.229	2.884	-6.181	15
670	oppD	b1246	1013	0.546	259.753	475.942	0.231	0.358	79.04	0.428	0.407	0.446	0.353	0.332	0.38	0.348	0.435	0.229	3.603	-9.981	12
671	oppF	b1247	1004	0.667	276.724	414.703	0.258	0.358	74.772	0.431	0.442	0.398	0.325	0.36	0.38	0.355	0.435	0.226	3.457	-9.481	-3
672	yciY	b4595	173	1.627	455.328	279.913	0.293	0.347	73.862	0.477	0.551	0.374	0.496	0.578	0.544	0.571	0.369	0.18	-0.349	-2.881	2020
676	yciO	b1267	620	1.008	82.419	81.784	0.378	0.34	17.208	0.391	0.4	0.378	0.316	0.354	0.381	0.325	0.394	0.242	4.131	-7.281	-3
678	rluB	b1269	875	1.536	654.265	426.006	0.262	0.39	90.274	0.433	0.438	0.426	0.442	0.479	0.442	0.451	0.428	0.269	4.024	-6.081	211
679	sohB	b1272	1049	0.722	77.448	107.203	0.385	0.351	21.782	0.431	0.434	0.426	0.385	0.468	0.503	0.452	0.428	0.236	4.316	-7.781	1605
680	topA	b1274	2597	0.805	300.578	373.51	0.26	0.368	63.81	0.453	0.443	0.462	0.364	0.373	0.433	0.341	0.455	0.253	4.377	-7.081	667
681	cysB	b1275	974	1.773	120.636	68.03	0.342	0.317	34.229	0.372	0.364	0.369	0.29	0.254	0.292	0.265	0.376	0.218	3.651	-7.381	210
686	yciS	b1279	308	0.811	78.257	96.461	0.371	0.346	19.531	0.422	0.375	0.46	0.295	0.307	0.368	0.309	0.443	0.18	2.312	-3.781	149
688	pyrF	b1281	737	1.089	231.03	212.064	0.302	0.38	34.98	0.416	0.413	0.416	0.363	0.333	0.416	0.395	0.418	0.222	3.716	-6.881	194
689	yciH	b1282	326	1.065	142.243	133.602	0.334	0.309	33.969	0.446	0.477	0.411	0.355	0.399	0.483	0.377	0.456	0.252	5.484	-6.181	0
695	pspA	b1304	668	1.641	130.615	79.572	0.394	0.323	20.196	0.386	0.395	0.374	0.404	0.371	0.398	0.397	0.385	0.294	5.342	-6.181	1264
714	tyrR	b1323	1541	1.005	90.026	89.61	0.365	0.367	15.776	0.448	0.451	0.437	0.451	0.498	0.476	0.464	0.445	0.217	4.031	-6.681	148
719	ynaJ	b1332	257	2.417	674.638	279.108	0.29	0.332	74.279	0.389	0.379	0.366	0.261	0.292	0.386	0.289	0.399	0.215	2.491	-6.081	273
771	cybB	b1418	530	2.161	139.948	64.773	0.335	0.305	20.895	0.377	0.35	0.405	0.386	0.323	0.345	0.373	0.381	0.217	1.638	-5.181	1231
783	ydcP	b1435	1961	0.799	75.857	94.945	0.375	0.357	16.671	0.442	0.435	0.443	0.363	0.308	0.329	0.363	0.446	0.227	4.259	-3.581	73
793	ydcY	b1446	233	1.966	593.655	301.989	0.248	0.322	59.333	0.416	0.446	0.364	0.419	0.459	0.475	0.432	0.383	0.239	6.132	-9.981	86
796	yncE	b1452	1061	1.916	227.029	118.49	0.349	0.351	33.688	0.403	0.409	0.395	0.368	0.361	0.339	0.338	0.404	0.253	4.621	-7.381	2380
821	marA	b1531	383	1.533	96.499	62.936	0.359	0.256	27.927	0.379	0.356	0.391	0.28	0.257	0.332	0.282	0.39	0.212	3.143	-7.881	20
826	ydfG	b1539	746	1.702	374.015	219.806	0.278	0.362	48.159	0.403	0.411	0.393	0.431	0.429	0.42	0.433	0.398	0.248	4.214	-7.481	2226
845	ynfB	b1583	341	2.923	302.772	103.599	0.348	0.278	25.827	0.382	0.367	0.39	0.338	0.32	0.323	0.364	0.393	0.212	3.247	-5.781	3097
846	speG	b1584	560	1.593	152.649	95.817	0.294	0.321	24.394	0.402	0.449	0.343	0.402	0.426	0.42	0.383	0.398	0.23	4.296	-7.381	35
859	ydgH	b1604	944	1.591	277.51	174.465	0.33	0.346	37.067	0.41	0.414	0.405	0.371	0.387	0.367	0.38	0.41	0.259	4.441	-6.081	3480
865	manA	b1613	1175	1.679	144.799	86.259	0.336	0.334	19.355	0.402	0.394	0.41	0.352	0.282	0.33	0.341	0.406	0.233	3.875	-5.781	3388
866	ydgA	b1614	1508	0.923	138.295	149.76	0.302	0.343	34.603	0.387	0.367	0.405	0.301	0.353	0.321	0.329	0.388	0.26	4.392	-3.581	101
874	rsxB	b1628	578	0.394	36.668	93.149	0.346	0.385	16.269	0.477	0.516	0.436	0.484	0.525	0.549	0.505	0.47	0.218	3.107	-1.981	0
882	slyB	b1641	467	2.154	1853.36	860.458	0.209	0.348	184.41	0.383	0.351	0.408	0.266	0.278	0.361	0.294	0.394	0.257	4.239	-7.781	4894
888	gloA	b1651	407	3.011	351.584	116.769	0.29	0.328	39.186	0.368	0.337	0.398	0.323	0.36	0.359	0.354	0.365	0.275	5.805	-7.481	81
892	sodB	b1656	581	3.913	3601.93	920.541	0.201	0.327	206.034	0.358	0.323	0.393	0.308	0.315	0.296	0.339	0.363	0.236	3.869	-9.881	128
893	purR	b1658	1025	0.838	290.028	346.049	0.26	0.394	61.518	0.446	0.42	0.463	0.483	0.472	0.433	0.461	0.442	0.254	3.977	-6.181	1885
895	cfa	b1661	1148	0.755	69.578	92.162	0.373	0.329	16.195	0.454	0.469	0.432	0.383	0.438	0.462	0.413	0.453	0.219	3.564	-6.281	291
897	ydhR	b1667	305	1.597	226.994	142.103	0.322	0.278	25.922	0.351	0.289	0.382	0.285	0.261	0.275	0.287	0.367	0.192	3.408	-8.681	1870
899	pykF	b1676	1412	3.588	1330.7	370.836	0.209	0.332	121.568	0.371	0.361	0.38	0.243	0.208	0.277	0.231	0.378	0.291	4.468	-0.881	6963
900	lpp	b1677	236	2.487	106248	42723.8	0.184	0.334	10968.5	0.383	0.355	0.403	0.301	0.263	0.342	0.302	0.407	0.295	3.247	-6.581	311
915	aroH	b1704	1046	1.204	121.941	101.262	0.342	0.358	23.205	0.433	0.45	0.412	0.324	0.413	0.476	0.379	0.434	0.225	3.795	-2.881	157
925	ydjN	b1729	1391	0.451	18.836	41.726	0.215	0.374	137.944	0.416	0.424	0.402	0.382	0.43	0.459	0.399	0.414	0.244	3.143	-7.781	133
927	nadE	b1740	827	1.902	261.349	137.385	0.322	0.319	28.325	0.381	0.371	0.389	0.322	0.279	0.349	0.316	0.389	0.25	4.635	-9.481	6330
929	xthA	b1749	806	2.135	316.211	148.121	0.317	0.36	37.363	0.421	0.397	0.444	0.466	0.359	0.353	0.417	0.426	0.259	4.837	-2.381	8026
941	ansA	b1767	1016	1.351	166.415	123.212	0.31	0.337	23.223	0.427	0.419	0.433	0.413	0.341	0.377	0.428	0.429	0.232	4.366	2.619	167
942	pncA	b1768	641	0.909	112.476	123.696	0.33	0.37	21.327	0.451	0.452	0.434	0.361	0.426	0.5	0.387	0.451	0.21	4.175	-9.981	11
943	gapA	b1779	995	2.386	10054.5	4214.52	0.17	0.314	880.518	0.374	0.361	0.384	0.278	0.325	0.401	0.308	0.375	0.282	4.109	-5.281	10243
958	yoaB	b1809	344	2.887	547.29	189.548	0.257	0.317	45.945	0.369	0.346	0.394	0.37	0.332	0.321	0.362	0.375	0.248	4.809	-7.481	6557
962	sdaA	b1814	1364	1.251	201.475	161.025	0.313	0.396	26.21	0.436	0.422	0.448	0.319	0.314	0.348	0.327	0.44	0.252	4.505	-7.781	184
964	manX	b1817	971	0.927	180.477	194.624	0.293	0.35	38.585	0.427	0.397	0.453	0.323	0.33	0.352	0.321	0.427	0.261	4.603	-13.681	2023
965	manY	b1818	800	0.555	120.093	216.514	0.266	0.362	42.602	0.404	0.394	0.41	0.311	0.241	0.283	0.287	0.414	0.247	3.035	-7.781	63
966	manZ	b1819	860	0.518	121.964	235.598	0.262	0.372	42.713	0.42	0.429	0.41	0.289	0.298	0.37	0.287	0.43	0.273	2.976	-3.581	4
981	pykA	b1854	1442	1.509	216.245	143.321	0.309	0.375	23.299	0.436	0.452	0.419	0.276	0.338	0.374	0.336	0.44	0.267	4.407	-6.181	128
987	yecN	b1869	395	0.268	28.047	104.649	0.391	0.379	17.025	0.552	0.499	0.603	0.485	0.368	0.53	0.415	0.576	0.208	2.32	-7.381	53
988	cmoA	b1870	743	0.932	100.538	107.899	0.351	0.349	21.586	0.428	0.429	0.396	0.303	0.328	0.44	0.32	0.431	0.248	4.005	-3.581	41
989	cmoB	b1871	971	0.668	96.745	144.818	0.333	0.378	21.284	0.451	0.445	0.457	0.323	0.344	0.453	0.335	0.455	0.226	4.338	-6.181	-3
990	argS	b1876	1733	1.405	399.88	284.625	0.253	0.382	55.646	0.409	0.415	0.402	0.353	0.436	0.458	0.398	0.408	0.275	4.826	-4.981	5649
995	ftnA	b1905	497	5.734	323.761	56.464	0.28	0.251	29.803	0.339	0.343	0.328	0.323	0.247	0.258	0.315	0.344	0.255	4.485	-6.181	171
997	yecF	b1915	224	7.101	568.405	80.041	0.258	0.278	54.2	0.377	0.384	0.364	0.312	0.318	0.347	0.315	0.396	0.282	4.12	-6.881	4926
1002	yedE	b1929	1205	0.933	108.752	116.588	0.283	0.393	24.577	0.43	0.418	0.433	0.251	0.37	0.391	0.351	0.432	0.251	2.497	-6.181	634
1003	yedF	b1930	233	2.397	214.352	89.44	0.283	0.323	29.513	0.452	0.459	0.437	0.384	0.461	0.44	0.418	0.449	0.228	3.639	-9.981	-3
1036	yeeN	b1983	716	2.028	352.307	173.683	0.291	0.262	57.925	0.359	0.359	0.355	0.308	0.338	0.362	0.359	0.36	0.225	5.122	-7.781	343
1050	hisG	b2019	899	2.002	319.086	159.347	0.323	0.351	23.138	0.415	0.407	0.419	0.236	0.296	0.325	0.279	0.42	0.283	4.341	-6.781	146
1053	hisB	b2022	1067	0.987	157.707	159.824	0.318	0.361	15.206	0.414	0.386	0.431	0.299	0.311	0.339	0.34	0.419	0.258	4.982	-6.181	0
1056	hisF	b2025	776	0.684	92.019	134.574	0.349	0.352	18.018	0.452	0.435	0.459	0.394	0.333	0.353	0.363	0.46	0.257	4.398	-11.981	-18
1057	hisI	b2026	611	1.48	207.895	140.426	0.302	0.358	26.701	0.402	0.371	0.435	0.337	0.34	0.38	0.359	0.407	0.261	4.706	-6.181	-6
1069	yegQ	b2081	1361	1.34	288.786	215.451	0.257	0.37	36.086	0.414	0.422	0.4	0.36	0.411	0.418	0.366	0.414	0.261	4.123	-2.881	147
1077	yohN	b2107	338	1.24	110.654	89.205	0.374	0.303	16.631	0.417	0.424	0.403	0.45	0.445	0.481	0.49	0.398	0.222	3.553	-7.381	219
1078	metG	b2114	2033	1.658	440.586	265.701	0.25	0.38	45.087	0.398	0.4	0.396	0.386	0.382	0.412	0.393	0.395	0.265	4.113	-3.181	7002
1105	yeiP	b2171	572	2.167	550.511	254.06	0.256	0.324	73.082	0.355	0.351	0.358	0.319	0.306	0.338	0.336	0.359	0.285	5.179	-5.181	406
1109	spr	b2175	566	0.887	402.317	453.454	0.236	0.357	106.24	0.443	0.45	0.416	0.339	0.437	0.413	0.381	0.443	0.222	3.181	-5.781	412
1116	rplY	b2185	284	1.899	8169.55	4301.73	0.173	0.271	1192.78	0.392	0.413	0.37	0.29	0.424	0.419	0.371	0.386	0.294	4.539	-6.181	125
1117	yejL	b2187	227	4.437	691.778	155.905	0.264	0.235	72.096	0.418	0.393	0.429	0.399	0.363	0.396	0.426	0.421	0.251	3.551	-0.281	1328
1119	narP	b2193	647	0.685	112.453	164.101	0.37	0.368	19.026	0.447	0.464	0.43	0.336	0.398	0.415	0.373	0.451	0.24	4.783	-7.781	4364
1123	rcsB	b2217	650	1.421	452.511	318.515	0.226	0.308	76.406	0.367	0.341	0.391	0.317	0.368	0.348	0.341	0.366	0.245	4.211	-4.881	17
1130	ubiG	b2232	722	2.203	200.482	90.986	0.359	0.377	24.163	0.42	0.442	0.391	0.411	0.343	0.368	0.386	0.427	0.248	4.696	-6.181	12274
1131	nrdA	b2234	2285	1.175	401.953	342.024	0.235	0.363	52.612	0.41	0.427	0.393	0.299	0.284	0.325	0.304	0.413	0.268	3.879	-4.981	4576
1132	nrdB	b2235	1130	0.831	281.17	338.28	0.268	0.345	56.636	0.412	0.413	0.402	0.303	0.341	0.394	0.336	0.416	0.256	4.17	-5.181	234
1133	yfaE	b2236	254	0.182	43.187	237.477	0.311	0.411	35.243	0.55	0.558	0.52	0.514	0.479	0.507	0.507	0.567	0.22	3.152	-2.281	0
1156	ackA	b2296	1202	1.991	2610.36	1310.82	0.201	0.335	257.63	0.392	0.366	0.416	0.341	0.365	0.361	0.356	0.392	0.276	4.092	-4.981	4009
1157	pta	b2297	2144	1.117	956.824	856.854	0.193	0.374	95.512	0.426	0.43	0.418	0.311	0.367	0.408	0.358	0.427	0.274	4.089	-6.181	75
1160	folX	b2303	362	1.893	539.833	285.141	0.239	0.278	57.975	0.384	0.364	0.397	0.444	0.416	0.355	0.454	0.376	0.249	3.749	-6.181	57
1161	yfcH	b2304	893	0.225	32.407	144.24	0.411	0.39	23.942	0.565	0.525	0.53	0.438	0.489	0.448	0.466	0.56	0.214	4.215	-8.581	21
1165	fadL	b2344	1340	1.15	401.463	349.131	0.248	0.341	84.661	0.399	0.42	0.378	0.388	0.4	0.416	0.395	0.399	0.234	3.341	-7.281	12149
1191	nupC	b2393	1202	0.513	97.995	190.891	0.282	0.332	37.217	0.418	0.407	0.428	0.407	0.449	0.416	0.428	0.416	0.275	2.337	-6.181	1715
1198	cysK	b2414	971	1.553	238.924	153.862	0.23	0.352	236.959	0.373	0.367	0.369	0.344	0.378	0.382	0.382	0.369	0.248	4.612	-7.881	185
1199	ptsH	b2415	257	2.934	5146.55	1754.04	0.162	0.279	456.31	0.352	0.327	0.364	0.243	0.35	0.326	0.309	0.35	0.254	5.255	-5.281	384
1200	ptsI	b2416	1727	0.944	1228.38	1301.66	0.244	0.358	237.824	0.483	0.504	0.455	0.399	0.467	0.473	0.435	0.483	0.267	4.604	-9.481	45
1201	crr	b2417	509	1.539	2796.33	1817.33	0.21	0.331	404.51	0.395	0.377	0.412	0.307	0.307	0.358	0.31	0.404	0.27	5.577	-7.781	41
1207	amiA	b2435	869	0.714	69.697	97.631	0.371	0.35	15.048	0.452	0.448	0.452	0.375	0.337	0.415	0.378	0.461	0.227	3.998	-3.281	2946
1222	yffB	b2471	356	2.142	277.982	129.777	0.345	0.292	29.857	0.36	0.34	0.376	0.231	0.295	0.359	0.263	0.37	0.237	3.773	-6.081	539
1223	dapE	b2472	1127	0.733	136.298	185.93	0.313	0.378	26.32	0.439	0.449	0.427	0.426	0.517	0.484	0.501	0.433	0.222	4.014	-7.881	4
1224	ypfN	b4547	200	0.642	102.8	160.14	0.339	0.275	26.612	0.465	0.445	0.475	0.388	0.478	0.445	0.447	0.459	0.237	5.549	-6.181	28
1226	bcp	b2480	470	2.234	637.21	285.234	0.265	0.325	94.49	0.401	0.423	0.376	0.317	0.391	0.418	0.35	0.396	0.257	5.257	-6.181	0
1240	yfgD	b2495	359	2.133	411.719	192.984	0.278	0.347	46.194	0.393	0.384	0.4	0.294	0.345	0.368	0.323	0.403	0.265	4.232	-6.081	21
1241	purM	b2499	1037	1.188	98.348	82.796	0.377	0.379	19.772	0.433	0.41	0.45	0.336	0.321	0.327	0.329	0.439	0.251	4.946	-6.681	3260
1242	purN	b2500	638	0.617	39.73	64.346	0.365	0.385	15.869	0.494	0.503	0.48	0.482	0.565	0.498	0.553	0.478	0.23	4.479	-3.681	0
1248	xseA	b2509	1370	0.936	95.064	101.572	0.365	0.348	17.073	0.479	0.471	0.458	0.363	0.342	0.395	0.365	0.484	0.224	3.567	0.319	3367
1250	suhB	b2533	803	1.395	741.234	531.538	0.213	0.365	119.884	0.409	0.403	0.406	0.469	0.466	0.431	0.45	0.404	0.264	4.41	-6.281	10103
1264	nadB	b2574	1622	1.09	203.625	186.777	0.287	0.372	26.139	0.444	0.441	0.447	0.347	0.344	0.419	0.381	0.447	0.215	4.048	0.419	10497
1265	srmB	b2576	1334	1.799	222.094	123.483	0.294	0.36	29.045	0.45	0.461	0.439	0.489	0.399	0.412	0.493	0.453	0.257	5.056	-7.881	854
1268	trxC	b2582	419	4.075	156.756	38.467	0.35	0.327	21.357	0.404	0.41	0.394	0.312	0.404	0.396	0.375	0.404	0.221	3.835	-7.881	1292
1271	pssA	b2585	1355	0.685	144.776	211.385	0.288	0.342	46.553	0.425	0.443	0.402	0.347	0.323	0.359	0.359	0.43	0.232	3.365	-0.881	114
1273	bamD	b2595	737	1.299	536.432	412.799	0.239	0.351	97.18	0.374	0.365	0.382	0.303	0.366	0.391	0.328	0.375	0.25	3.978	-7.481	11695
1274	raiA	b2597	341	2.267	386.957	170.719	0.274	0.253	44.664	0.326	0.294	0.345	0.278	0.307	0.299	0.315	0.329	0.268	4.252	-7.881	271
1276	pheA	b2599	1160	1.42	150.219	105.806	0.327	0.322	20.583	0.401	0.418	0.384	0.311	0.381	0.396	0.348	0.4	0.215	3.909	-3.281	99
1286	smpB	b2620	482	2.773	447.06	161.196	0.245	0.335	53.598	0.394	0.415	0.366	0.341	0.398	0.384	0.391	0.39	0.254	3.611	0.319	950
1326	ygaZ	b2682	737	0.313	37.188	118.749	0.31	0.36	20.068	0.492	0.518	0.455	0.578	0.498	0.494	0.538	0.481	0.214	2.265	-2.181	121
1327	ygaH	b2683	335	0.318	36.665	115.156	0.369	0.373	15.807	0.464	0.494	0.41	0.421	0.444	0.518	0.442	0.464	0.228	1.632	-8.681	-10
1328	mprA	b2684	530	2.357	1012.48	429.598	0.217	0.316	116.347	0.376	0.365	0.384	0.285	0.382	0.419	0.355	0.374	0.229	4.37	-8.481	91
1329	emrA	b2685	1172	0.637	61.859	97.168	0.357	0.366	16.969	0.463	0.452	0.472	0.392	0.407	0.464	0.401	0.465	0.259	3.833	-6.181	127
1364	queF	b2794	848	1.973	155.326	78.714	0.352	0.327	19.337	0.399	0.405	0.389	0.419	0.387	0.399	0.414	0.399	0.224	3.712	-4.081	7535
1366	sdaC	b2796	1289	0.697	657.702	943.888	0.195	0.355	147.878	0.384	0.389	0.376	0.385	0.348	0.347	0.378	0.379	0.289	2.19	-7.781	557
1367	sdaB	b2797	1367	0.785	445.4	567.659	0.207	0.396	78.559	0.441	0.413	0.469	0.377	0.371	0.36	0.373	0.443	0.249	4.277	-1.381	58
1412	fldB	b2895	521	0.782	128.268	164.109	0.277	0.328	35.686	0.422	0.421	0.42	0.353	0.427	0.432	0.393	0.418	0.246	5.28	-2.881	6242
1413	ygfZ	b2898	980	1.847	472.103	255.548	0.263	0.38	33.005	0.424	0.392	0.447	0.449	0.434	0.407	0.43	0.417	0.242	4.515	-5.181	937
1414	bglA	b2901	1439	1.365	210.383	154.156	0.318	0.344	25.727	0.4	0.4	0.4	0.412	0.337	0.382	0.434	0.402	0.264	4.207	-6.181	1369
1415	zapA	b2910	329	0.723	300.004	414.793	0.332	0.27	92.027	0.429	0.384	0.43	0.346	0.442	0.452	0.426	0.404	0.249	4.058	-8.981	10511
1424	metK	b2942	1154	1.867	3881.82	2079.39	0.181	0.364	488.877	0.391	0.388	0.393	0.327	0.359	0.369	0.336	0.393	0.27	4.183	-3.281	304
1428	rsmE	b2946	731	0.904	82.465	91.253	0.358	0.369	17.652	0.505	0.454	0.482	0.398	0.416	0.463	0.419	0.5	0.223	4.018	-3.581	80
1429	gshB	b2947	950	1.565	253.992	162.279	0.343	0.362	24.919	0.425	0.401	0.449	0.382	0.302	0.328	0.333	0.434	0.272	4.164	-6.181	13
1430	yqgE	b2948	563	0.919	94.111	102.395	0.345	0.325	15.518	0.426	0.447	0.405	0.335	0.398	0.428	0.376	0.43	0.24	4.514	-5.181	109
1432	yggS	b2951	704	1.494	118.313	79.199	0.376	0.358	17.817	0.449	0.427	0.459	0.365	0.391	0.424	0.415	0.453	0.242	4.121	-2.181	1182
1433	yggT	b2952	566	0.496	72.385	146.073	0.29	0.35	25.81	0.409	0.375	0.439	0.324	0.373	0.335	0.363	0.413	0.259	1.843	-7.381	18
1434	yggU	b2953	290	0.376	34.396	91.367	0.345	0.351	18.296	0.501	0.554	0.45	0.448	0.491	0.545	0.483	0.493	0.223	4.155	-5.681	-3
1435	rdgB	b2954	593	1.184	131.011	110.684	0.343	0.368	19.648	0.462	0.47	0.448	0.348	0.415	0.459	0.408	0.46	0.254	5.195	-4.981	8
1438	yggX	b2962	275	1.636	500.748	305.995	0.297	0.294	74.399	0.352	0.33	0.369	0.296	0.297	0.334	0.301	0.362	0.273	4.641	-6.781	28
1448	metC	b3008	1187	1.731	236.757	136.773	0.328	0.36	34.843	0.397	0.393	0.4	0.396	0.314	0.38	0.374	0.397	0.212	3.794	-5.181	1690
1456	mdaB	b3028	581	1.659	183.811	110.78	0.364	0.342	23.459	0.4	0.392	0.407	0.409	0.354	0.364	0.388	0.405	0.264	4.732	-7.881	697
1457	ygiN	b3029	314	1.54	465.574	302.33	0.235	0.323	65.575	0.389	0.392	0.383	0.384	0.35	0.351	0.379	0.398	0.24	4.225	-8.681	31
1458	tolC	b3035	1481	1.782	733.585	411.64	0.229	0.34	97.245	0.406	0.4	0.412	0.338	0.392	0.346	0.336	0.405	0.243	3.761	-6.081	4659
1459	ygiB	b3037	671	1.821	314.745	172.847	0.263	0.377	34.979	0.461	0.434	0.485	0.376	0.34	0.394	0.371	0.472	0.254	3.411	-3.581	148
1460	ygiC	b3038	1160	0.421	68.295	162.206	0.282	0.364	31.237	0.458	0.446	0.468	0.394	0.401	0.541	0.396	0.46	0.247	4.462	-5.281	6
1462	yqiC	b3042	290	9.091	641.384	70.548	0.273	0.268	39.718	0.381	0.369	0.384	0.382	0.35	0.348	0.376	0.385	0.247	5.13	-5.781	1517
1478	rpsU	b3065	215	1.879	18413.5	9797.53	0.208	0.311	1752.36	0.443	0.438	0.432	0.36	0.423	0.435	0.375	0.444	0.307	4.249	-5.481	1294
1479	dnaG	b3066	1745	0.132	47.275	359.155	0.335	0.365	44.081	0.577	0.568	0.499	0.534	0.672	0.62	0.596	0.559	0.217	3.369	-2.281	111
1480	rpoD	b3067	1841	1.156	1045.33	904.097	0.198	0.352	131.647	0.436	0.421	0.447	0.382	0.427	0.413	0.407	0.436	0.292	5.69	-3.581	195
1494	sstT	b3089	1244	0.66	71.034	107.575	0.343	0.387	20.733	0.439	0.431	0.444	0.365	0.439	0.44	0.384	0.433	0.247	2.322	-6.081	399
1496	exuR	b3094	776	1.05	68.452	65.188	0.382	0.318	18.734	0.456	0.436	0.416	0.373	0.373	0.425	0.401	0.456	0.256	4.514	-6.181	130
1497	yqjA	b3095	662	0.838	60.563	72.262	0.355	0.349	17.391	0.467	0.468	0.454	0.352	0.391	0.413	0.36	0.475	0.222	2.466	-5.181	345
1499	yqjC	b3097	368	1.061	159.11	149.953	0.329	0.301	35.149	0.381	0.393	0.364	0.363	0.351	0.323	0.348	0.383	0.244	4.957	-7.381	147
1500	yqjD	b3098	305	1.98	474.573	239.691	0.281	0.397	45.941	0.407	0.332	0.486	0.373	0.325	0.342	0.356	0.426	0.25	4.759	-6.181	38
1501	yqjE	b3099	404	0.165	34.751	211.167	0.279	0.393	33.499	0.517	0.516	0.505	0.471	0.469	0.517	0.497	0.523	0.226	3.093	-0.181	3
1502	yqjK	b3100	299	0.114	17.568	153.653	0.281	0.445	28.063	0.567	0.562	0.552	0.53	0.551	0.551	0.55	0.569	0.218	2.301	-11.081	-10
1508	yhaL	b3107	164	1.206	83.771	69.449	0.432	0.318	18.042	0.478	0.47	0.48	0.453	0.438	0.441	0.465	0.5	0.24	6.098	-8.381	23
1531	diaA	b3149	590	0.494	47.479	96.034	0.371	0.354	20.1	0.468	0.458	0.461	0.35	0.353	0.4	0.346	0.476	0.218	3.517	-6.781	20
1532	yraP	b3150	575	1.12	124.131	110.867	0.315	0.365	25.391	0.439	0.429	0.448	0.315	0.356	0.419	0.352	0.446	0.257	4.145	-9.981	10
1539	yhbY	b3180	293	2.807	1632.17	581.479	0.194	0.329	173.895	0.363	0.319	0.4	0.332	0.263	0.293	0.324	0.392	0.249	4.067	-2.181	7810
1541	ispB	b3187	971	0.745	193.086	259.28	0.264	0.358	54.466	0.453	0.465	0.44	0.495	0.506	0.47	0.522	0.45	0.239	4.467	-1.681	3314
1544	kdsD	b3197	986	0.579	90.582	156.476	0.327	0.372	21.852	0.472	0.468	0.472	0.353	0.426	0.447	0.406	0.475	0.226	4.044	-3.581	14
1545	kdsC	b3198	566	0.726	131.292	180.868	0.295	0.379	29.416	0.473	0.457	0.481	0.42	0.577	0.534	0.475	0.459	0.237	3.982	-6.081	21
1547	lptA	b3200	557	0.924	214.193	231.704	0.27	0.306	41.328	0.373	0.379	0.365	0.317	0.327	0.329	0.344	0.377	0.27	4.319	-4.181	-31
1548	lptB	b3201	725	0.843	171.237	203.16	0.27	0.374	29.052	0.44	0.448	0.426	0.34	0.363	0.383	0.352	0.444	0.257	4.585	-3.881	7
1549	rpoN	b3202	1433	0.347	73.773	212.808	0.301	0.355	28.649	0.481	0.475	0.484	0.405	0.488	0.488	0.465	0.478	0.234	4.484	-8.981	48
1550	hpf	b3203	287	0.62	157.251	253.511	0.248	0.257	53.938	0.35	0.36	0.336	0.326	0.361	0.387	0.339	0.344	0.227	5.439	-7.381	23
1551	ptsN	b3204	491	1.117	195.878	175.29	0.292	0.357	40.289	0.437	0.394	0.469	0.286	0.259	0.333	0.305	0.457	0.219	4.103	-4.981	118
1552	yhbJ	b3205	854	0.753	119.605	158.902	0.3	0.346	24.621	0.459	0.481	0.434	0.472	0.591	0.589	0.53	0.443	0.222	3.55	-10.081	46
1554	yrbL	b3207	632	0.752	123.966	164.867	0.288	0.34	55.902	0.426	0.403	0.44	0.44	0.323	0.371	0.404	0.437	0.213	3.345	-7.781	214
1556	gltD	b3213	1418	0.703	123.83	176.081	0.318	0.411	18.506	0.476	0.463	0.486	0.397	0.466	0.416	0.445	0.476	0.274	4.69	-9.981	13
1565	yhcB	b3233	398	1.068	269.411	252.311	0.255	0.369	69.975	0.398	0.362	0.406	0.282	0.308	0.365	0.302	0.408	0.267	4.3	-6.181	3955
1568	argR	b3237	470	1.424	315.928	221.892	0.257	0.306	54.45	0.398	0.388	0.401	0.366	0.276	0.343	0.317	0.416	0.236	3.879	-3.381	1436
1569	yhcN	b3238	263	3.265	292.724	89.648	0.389	0.303	27.89	0.363	0.313	0.401	0.301	0.306	0.318	0.328	0.376	0.262	3.956	-7.881	365
1574	accB	b3255	470	1.781	2847.81	1598.62	0.193	0.329	273.193	0.406	0.425	0.382	0.266	0.264	0.324	0.275	0.422	0.271	4.539	-3.581	402
1575	accC	b3256	1349	0.592	953.042	1610.97	0.21	0.383	248.77	0.484	0.513	0.455	0.521	0.584	0.552	0.573	0.479	0.28	4.047	-6.781	11
1578	prmA	b3259	881	1.593	261.462	164.099	0.281	0.372	32.534	0.414	0.419	0.405	0.316	0.362	0.394	0.324	0.417	0.242	4.991	-3.481	12
1579	dusB	b3260	965	0.024	35.794	1481.59	0.284	0.374	291.696	0.596	0.541	0.606	0.489	0.512	0.495	0.524	0.599	0.216	3.487	-1.681	329
1580	fis	b3261	296	2.057	4515.79	2195.73	0.205	0.269	542.185	0.357	0.334	0.379	0.322	0.387	0.368	0.36	0.345	0.324	4.362	-3.481	26
1592	def	b3287	509	1.08	326.626	302.296	0.242	0.317	82.706	0.409	0.401	0.414	0.379	0.422	0.382	0.407	0.406	0.259	4.723	-6.181	3900
1593	fmt	b3288	947	0.691	214.445	310.173	0.241	0.372	52.639	0.436	0.474	0.398	0.351	0.507	0.545	0.44	0.429	0.229	3.914	-7.381	15
1594	rsmB	b3289	1289	1.126	134.856	119.753	0.325	0.347	19.883	0.418	0.436	0.398	0.455	0.427	0.418	0.463	0.418	0.218	3.539	-3.781	46
1595	trkA	b3290	1376	0.331	34.239	103.423	0.384	0.372	15.02	0.463	0.461	0.458	0.442	0.46	0.424	0.436	0.461	0.222	4.438	-3.481	22
1596	mscL	b3291	410	1.359	192.504	141.599	0.329	0.31	34.54	0.385	0.409	0.36	0.419	0.38	0.386	0.433	0.382	0.238	3.388	-9.681	130
1609	slyX	b3348	218	1.246	198.813	159.568	0.345	0.293	38.671	0.434	0.395	0.453	0.413	0.455	0.404	0.476	0.415	0.228	5.278	-7.881	11420
1614	crp	b3357	632	1.131	722.475	638.842	0.215	0.347	151.524	0.373	0.378	0.368	0.329	0.341	0.337	0.352	0.375	0.276	3.679	-5.181	761
1630	hslR	b3400	401	0.32	82.905	258.975	0.267	0.331	42.97	0.482	0.487	0.465	0.412	0.511	0.5	0.474	0.472	0.216	4.698	-8.681	11
1631	hslO	b3401	878	1.305	475.772	364.531	0.242	0.36	54.458	0.385	0.39	0.378	0.331	0.348	0.325	0.368	0.386	0.266	5.598	-4.881	25
1632	pck	b3403	1622	1.62	466.87	288.171	0.261	0.358	52.476	0.417	0.404	0.411	0.263	0.274	0.344	0.268	0.419	0.261	4.255	-9.981	2166
1634	yhgF	b3407	2321	1.29	237.604	184.148	0.283	0.4	20.734	0.455	0.442	0.462	0.397	0.437	0.476	0.422	0.455	0.263	4.93	-0.281	97
1661	dcrB	b3472	557	1.577	548.61	347.985	0.236	0.353	87.964	0.387	0.392	0.377	0.283	0.392	0.364	0.347	0.384	0.26	4.565	-6.081	73
1675	pitA	b3493	1499	0.318	157.845	495.72	0.253	0.409	69.833	0.506	0.528	0.484	0.427	0.449	0.457	0.413	0.507	0.24	2.778	-1.681	1749
1676	uspA	b3495	434	4.512	1089.87	241.537	0.212	0.288	81.03	0.332	0.333	0.33	0.286	0.307	0.326	0.297	0.335	0.257	4.223	-8.681	970
1679	gor	b3500	1352	1.339	248.649	185.671	0.296	0.38	26.517	0.453	0.451	0.454	0.317	0.401	0.415	0.356	0.454	0.254	4.564	-7.381	72
1695	kdgK	b3526	929	1.339	181.069	135.238	0.321	0.386	21.829	0.462	0.48	0.443	0.496	0.484	0.494	0.512	0.45	0.252	4.577	-4.981	3311
1702	yiaD	b3552	659	2.239	262.96	117.419	0.35	0.389	21.212	0.39	0.39	0.387	0.33	0.398	0.383	0.392	0.388	0.262	4.41	-7.381	2455
1703	ghrB	b3553	974	1.956	189.48	96.895	0.324	0.328	20.651	0.393	0.362	0.422	0.365	0.271	0.319	0.327	0.401	0.237	4.055	-6.181	104
1705	cspA	b3556	212	2.24	7347.97	3280.12	0.219	0.301	574.005	0.349	0.348	0.337	0.323	0.339	0.337	0.33	0.341	0.29	4.08	-4.181	281
1714	avtA	b3572	1253	1.199	171.791	143.316	0.305	0.351	30.204	0.425	0.419	0.406	0.375	0.358	0.407	0.374	0.427	0.246	3.346	-0.281	178
1739	yibL	b3602	362	5.028	482.653	95.99	0.317	0.31	39.124	0.388	0.402	0.369	0.339	0.314	0.355	0.352	0.398	0.299	5.392	-0.981	506
1744	gpmM	b3612	1544	1.568	493.417	314.67	0.242	0.361	57.355	0.394	0.385	0.402	0.288	0.32	0.307	0.321	0.396	0.279	5.005	-7.881	3572
1745	envC	b3613	1259	0.227	38.632	170.315	0.363	0.405	24.476	0.523	0.498	0.53	0.46	0.585	0.66	0.532	0.511	0.248	4.389	-4.181	34
1747	rfaD	b3619	932	1.916	777.252	405.721	0.248	0.359	91.946	0.398	0.409	0.385	0.324	0.38	0.412	0.357	0.397	0.273	4.454	-4.981	4927
1748	rfaF	b3620	1046	0.335	77.29	231.02	0.331	0.387	32.795	0.516	0.55	0.458	0.531	0.52	0.537	0.501	0.475	0.229	3.476	-2.881	10
1751	waaA	b3633	1277	0.483	47.117	97.632	0.349	0.361	19.767	0.462	0.441	0.482	0.469	0.386	0.431	0.434	0.465	0.223	3.25	-2.181	10333
1752	coaD	b3634	479	0.726	98.763	135.96	0.375	0.366	20.756	0.424	0.428	0.401	0.346	0.34	0.363	0.325	0.433	0.234	4.27	-7.881	8
1753	dfp	b3639	1220	0.694	108.124	155.826	0.396	0.36	27.147	0.53	0.476	0.557	0.469	0.458	0.489	0.47	0.531	0.218	3.542	-5.181	2427
1754	dut	b3640	455	1.19	415.777	349.271	0.243	0.381	73.647	0.415	0.44	0.381	0.349	0.394	0.414	0.399	0.415	0.242	4.627	-2.881	-19
1755	slmA	b3641	596	0.637	164.628	258.526	0.257	0.357	51.283	0.445	0.416	0.467	0.377	0.369	0.424	0.386	0.447	0.265	4.458	-7.781	107
1756	yicC	b3644	863	1.069	252.71	236.322	0.28	0.36	51.635	0.427	0.42	0.43	0.443	0.447	0.445	0.441	0.422	0.27	4.708	-5.181	1586
1759	gmk	b3648	623	0.714	391.423	548.228	0.256	0.339	105.849	0.457	0.438	0.474	0.299	0.395	0.407	0.354	0.459	0.223	5.029	-0.281	1937
1760	rpoZ	b3649	275	2.165	2722.07	1257.28	0.187	0.329	354.152	0.373	0.339	0.402	0.337	0.297	0.344	0.349	0.388	0.303	6.344	-6.181	55
1761	spoT	b3650	2108	0.145	54.423	375.637	0.416	0.382	59.857	0.616	0.628	0.485	0.453	0.516	0.548	0.506	0.601	0.243	4.02	-6.881	19
1762	trmH	b3651	689	0.401	83.167	207.544	0.289	0.383	27.368	0.459	0.457	0.459	0.32	0.383	0.428	0.359	0.466	0.25	3.48	-0.081	7
1781	rnpA	b3704	359	0.162	183.096	1129.85	0.4	0.327	232.933	0.587	0.604	0.552	0.582	0.634	0.615	0.645	0.527	0.208	3.177	-0.881	17
1782	yidD	b4557	257	0.085	67.864	797.428	0.276	0.387	145.279	0.494	0.501	0.479	0.511	0.423	0.439	0.501	0.5	0.179	1.716	-3.581	-36
1783	yidC	b3705	1646	0.399	430.712	1079	0.211	0.376	199.132	0.424	0.415	0.432	0.281	0.382	0.462	0.329	0.425	0.276	3.213	-2.881	3
1784	mnmE	b3706	1364	0.576	64.366	111.675	0.338	0.39	19.892	0.457	0.473	0.44	0.401	0.508	0.481	0.425	0.453	0.25	4.582	-3.281	106
1795	asnA	b3744	992	1.503	417.296	277.583	0.307	0.403	49.685	0.476	0.472	0.438	0.437	0.383	0.401	0.428	0.481	0.244	4.767	-7.781	28546
1797	rbsD	b3748	419	0.231	53.939	233.416	0.395	0.314	42.85	0.513	0.5	0.502	0.414	0.482	0.526	0.471	0.504	0.221	3.965	-6.281	167
1800	rbsB	b3751	890	1.277	137.072	107.358	0.421	0.36	26.586	0.485	0.393	0.53	0.356	0.408	0.419	0.376	0.489	0.259	4.726	-5.181	25
1803	yifE	b3764	338	1.53	3670.73	2398.7	0.246	0.319	485.277	0.435	0.408	0.458	0.31	0.328	0.354	0.323	0.457	0.222	4.988	-8.981	8867
1808	ilvE	b3770	929	2.319	347.937	150.02	0.306	0.382	23.784	0.414	0.383	0.441	0.29	0.283	0.339	0.282	0.417	0.257	4.373	-6.081	20
1811	ilvC	b3774	1475	1.677	521.309	310.776	0.249	0.373	201.348	0.388	0.392	0.383	0.324	0.329	0.36	0.323	0.39	0.292	4.675	-6.181	1095
1813	trxA	b3781	329	1.951	2753.05	1411.03	0.206	0.345	339.809	0.355	0.351	0.355	0.245	0.264	0.323	0.279	0.375	0.268	4.731	-6.181	3063
1814	rho	b3783	1259	2.055	1427.64	694.728	0.207	0.333	177.375	0.401	0.39	0.41	0.347	0.371	0.382	0.363	0.401	0.273	4.453	-2.181	327
1815	rfe	b3784	1103	0.387	95.624	247.285	0.292	0.363	43.473	0.432	0.428	0.429	0.336	0.411	0.445	0.373	0.433	0.226	1.758	-2.981	240
1816	wzzE	b3785	1046	0.307	80.57	262.777	0.289	0.379	40.429	0.464	0.457	0.467	0.376	0.42	0.43	0.372	0.466	0.237	3.52	-6.181	12
1817	rffE	b3786	1130	0.586	138.296	236.053	0.281	0.376	32.291	0.446	0.459	0.432	0.463	0.512	0.447	0.471	0.443	0.223	3.816	-2.881	56
1818	rffD	b3787	1262	0.769	166.853	216.847	0.301	0.391	30.748	0.453	0.463	0.439	0.357	0.467	0.452	0.427	0.451	0.223	3.985	-3.581	-3
1819	rffG	b3788	1067	0.549	110.811	201.701	0.336	0.375	24.82	0.473	0.476	0.469	0.382	0.451	0.424	0.456	0.474	0.239	4.333	-8.681	0
1820	rffH	b3789	881	0.349	62.769	179.782	0.315	0.403	19.616	0.473	0.461	0.479	0.461	0.499	0.482	0.485	0.469	0.243	4.314	-9.481	19
1821	rffC	b3790	674	0.208	24.508	118.083	0.344	0.401	15.219	0.489	0.497	0.48	0.439	0.461	0.486	0.451	0.49	0.198	3.812	-6.181	-22
1822	rffA	b3791	1130	1.101	130.047	118.068	0.366	0.4	18.789	0.468	0.447	0.486	0.3	0.371	0.404	0.336	0.47	0.249	4.036	-4.981	5
1827	yifK	b3795	1385	0.482	102.175	212.183	0.286	0.398	37.099	0.435	0.443	0.426	0.38	0.383	0.448	0.374	0.435	0.238	1.862	-6.181	191
1829	cyaA	b3806	2546	0.278	51.923	186.638	0.348	0.369	27.998	0.51	0.511	0.468	0.399	0.427	0.467	0.42	0.508	0.24	3.411	-3.281	6960
1830	yifL	b4558	203	3.005	715.141	237.999	0.233	0.261	53.132	0.396	0.379	0.404	0.388	0.388	0.374	0.399	0.398	0.24	4.239	-3.281	823
1831	dapF	b3809	824	0.325	87.634	269.311	0.315	0.399	28.253	0.475	0.431	0.508	0.346	0.391	0.384	0.403	0.477	0.23	4.759	-6.181	37
1832	yigA	b3810	707	0.314	57.513	183.004	0.348	0.422	17.921	0.495	0.493	0.497	0.323	0.364	0.39	0.376	0.504	0.224	4.144	-3.581	-3
1835	uvrD	b3813	2162	0.523	69.219	132.393	0.363	0.424	15.911	0.491	0.486	0.494	0.449	0.496	0.524	0.494	0.489	0.255	4.021	-6.681	84
1836	corA	b3816	950	0.653	114.756	175.815	0.311	0.366	37.698	0.455	0.444	0.453	0.409	0.367	0.338	0.394	0.461	0.254	4.324	-6.181	1281
1837	pldA	b3821	869	0.924	101.499	109.834	0.354	0.36	22.043	0.437	0.452	0.413	0.453	0.535	0.499	0.515	0.431	0.24	3.675	-6.181	2486
1843	metE	b3829	2261	1.8	23032.5	12794.7	0.181	0.386	1286.14	0.374	0.365	0.381	0.25	0.306	0.326	0.29	0.375	0.255	4.418	-6.181	1078
1844	udp	b3831	761	1.669	226.711	135.835	0.32	0.355	23.504	0.404	0.393	0.415	0.293	0.338	0.369	0.306	0.409	0.241	4.227	-7.781	1117
1846	ubiE	b3833	755	1.298	421.291	324.444	0.23	0.346	57.409	0.41	0.408	0.393	0.33	0.358	0.425	0.366	0.407	0.25	4.434	-6.581	95
1847	yigP	b3834	605	0.469	117.799	251.433	0.283	0.4	34.688	0.472	0.477	0.463	0.398	0.407	0.49	0.39	0.478	0.247	4.617	-7.781	14
1849	tatA	b3836	269	1.783	715.013	401.09	0.257	0.291	105.611	0.359	0.371	0.345	0.346	0.349	0.376	0.385	0.359	0.233	5.387	-6.181	79
1850	tatB	b3838	515	0.241	98.543	408.332	0.269	0.353	69.047	0.487	0.488	0.467	0.393	0.535	0.515	0.471	0.481	0.217	4.917	-5.981	4
1851	tatC	b3839	776	0.19	44.897	236.621	0.288	0.368	36.022	0.453	0.422	0.481	0.297	0.295	0.353	0.319	0.466	0.239	2.902	-0.081	3
1853	ubiD	b3843	1493	0.492	131.104	266.42	0.282	0.388	46.837	0.447	0.455	0.437	0.543	0.47	0.444	0.529	0.444	0.239	4.629	-6.181	652
1854	fre	b3844	701	0.617	197.286	319.494	0.28	0.357	46.335	0.433	0.398	0.471	0.346	0.329	0.402	0.344	0.442	0.228	4.512	-2.881	46
1855	pepQ	b3847	1331	1.316	235.194	178.673	0.306	0.358	28.867	0.409	0.413	0.4	0.403	0.36	0.376	0.387	0.411	0.257	4.431	-4.281	3933
1858	hemG	b3850	545	1.073	97.835	91.145	0.4	0.328	18.436	0.436	0.418	0.416	0.255	0.333	0.359	0.336	0.446	0.237	3.61	-6.281	12
1859	yihD	b3858	269	2.692	368.613	136.924	0.305	0.299	38.874	0.355	0.331	0.377	0.417	0.318	0.335	0.397	0.367	0.273	5.405	-9.981	6916
1861	dsbA	b3860	626	2.09	835.477	399.679	0.242	0.337	116.807	0.387	0.37	0.4	0.382	0.477	0.368	0.432	0.377	0.254	4.683	-6.181	17
1863	polA	b3863	2786	1.371	185.188	135.073	0.326	0.361	20.287	0.426	0.425	0.426	0.376	0.321	0.398	0.379	0.427	0.251	4.959	-3.881	1337
1864	yihI	b3866	509	1.606	468.85	291.848	0.263	0.32	63.375	0.389	0.376	0.387	0.29	0.359	0.371	0.343	0.395	0.26	6.056	-0.881	1595
1865	hemN	b3867	1373	0.709	67.016	94.558	0.348	0.363	17.678	0.469	0.489	0.431	0.439	0.439	0.431	0.431	0.464	0.243	3.874	-8.681	189
1866	typA	b3871	1823	0.879	1595.07	1815.63	0.191	0.362	280.026	0.44	0.427	0.453	0.47	0.501	0.466	0.493	0.437	0.281	5.006	-6.181	4989
1874	dtd	b3887	437	0.799	97.023	121.429	0.445	0.362	15.338	0.486	0.503	0.454	0.387	0.429	0.42	0.406	0.494	0.25	4.737	-0.881	-3
1882	sodA	b3908	620	2.367	4119.84	1740.35	0.206	0.35	462.671	0.373	0.345	0.402	0.347	0.309	0.293	0.333	0.375	0.284	4.463	-6.181	1316
1885	cpxP	b4484	500	0.287	29.006	100.934	0.363	0.311	23.034	0.401	0.4	0.379	0.455	0.431	0.416	0.427	0.386	0.206	3.732	-6.181	2324
1887	pfkA	b3916	962	1.27	395.445	311.372	0.247	0.376	50.907	0.417	0.421	0.412	0.37	0.438	0.431	0.421	0.411	0.284	4.204	-7.881	181
1894	rpmE	b3936	212	1.72	5754	3345.39	0.201	0.286	1268.01	0.36	0.341	0.376	0.339	0.325	0.328	0.341	0.374	0.26	3.673	-7.881	8253
1895	metB	b3939	1160	0.493	197.509	400.517	0.249	0.389	80.854	0.493	0.471	0.496	0.399	0.428	0.461	0.419	0.491	0.242	4.125	-5.781	1447
1896	metL	b3940	2432	0.982	351.577	358.182	0.253	0.434	57.162	0.463	0.457	0.456	0.372	0.371	0.416	0.36	0.46	0.244	4.4	-8.681	3
1897	metF	b3941	890	0.966	938.472	971.47	0.23	0.356	280.799	0.407	0.408	0.403	0.357	0.405	0.397	0.394	0.406	0.23	4.542	-8.581	349
1898	katG	b3942	2180	0.983	182.712	185.836	0.302	0.391	17.444	0.465	0.451	0.478	0.336	0.343	0.384	0.354	0.467	0.256	4.569	-6.881	329
1908	oxyR	b3961	917	0.864	164.268	190.191	0.309	0.394	30.379	0.479	0.459	0.488	0.4	0.497	0.541	0.473	0.475	0.239	4.548	-9.481	267
1909	fabR	b3963	647	0.601	93.663	155.881	0.286	0.377	30.73	0.489	0.489	0.473	0.332	0.444	0.494	0.4	0.492	0.225	4.141	-6.081	1717
1910	yijD	b3964	359	1.639	212.176	129.444	0.313	0.322	30.019	0.427	0.395	0.454	0.301	0.292	0.396	0.32	0.433	0.24	2.51	-6.081	0
1911	btuB	b3966	1844	1.403	187.586	133.687	0.349	0.353	29.933	0.43	0.424	0.427	0.448	0.462	0.417	0.436	0.428	0.216	4.378	-3.581	1509
1912	murI	b3967	857	0.744	84.797	113.913	0.391	0.374	28.249	0.495	0.518	0.459	0.36	0.403	0.53	0.377	0.465	0.202	3.471	-2.881	-55
1913	murB	b3972	1028	1.01	110.041	108.899	0.36	0.314	25.468	0.404	0.411	0.384	0.427	0.402	0.398	0.435	0.404	0.216	4.015	-5.181	5772
1915	tufB	b3980	1184	1.565	31230.8	19958.7	0.212	0.359	3270.58	0.42	0.415	0.421	0.262	0.304	0.325	0.307	0.423	0.291	4.881	-6.181	1897
1916	secE	b3981	383	0.554	953.694	1721.04	0.205	0.387	279.646	0.441	0.468	0.396	0.405	0.415	0.458	0.403	0.427	0.248	4.008	-7.081	230
1917	nusG	b3982	545	0.948	1665	1755.63	0.191	0.385	322.949	0.476	0.447	0.503	0.352	0.402	0.421	0.374	0.483	0.27	4.775	-7.881	2
1918	rplK	b3983	428	1.291	12523.5	9698.18	0.159	0.366	2353.91	0.415	0.391	0.436	0.371	0.406	0.395	0.412	0.417	0.284	4.294	-7.481	159
1919	rplA	b3984	704	0.935	12600.1	13474.4	0.188	0.354	2579.15	0.424	0.429	0.418	0.356	0.344	0.392	0.338	0.431	0.3	4.725	-9.481	4
1920	rplJ	b3985	497	0.64	14119.4	22067.6	0.193	0.362	3968.31	0.509	0.499	0.515	0.365	0.348	0.43	0.357	0.531	0.277	4.699	-7.781	413
1921	rplL	b3986	365	1.87	34118	18241.6	0.173	0.306	5032.14	0.341	0.329	0.349	0.251	0.282	0.309	0.273	0.351	0.301	5.996	-5.181	67
1922	rpoB	b3987	4028	0.752	1662.41	2210.2	0.199	0.373	184	0.463	0.448	0.478	0.339	0.357	0.388	0.361	0.465	0.29	4.688	-6.181	320
1923	rpoC	b3988	4223	0.642	1691.78	2636.76	0.198	0.391	274.128	0.474	0.472	0.472	0.372	0.303	0.396	0.367	0.476	0.289	4.501	-6.181	77
1926	hemE	b3997	1064	1.114	176.887	158.796	0.31	0.397	25.936	0.427	0.436	0.415	0.44	0.439	0.452	0.455	0.423	0.25	4.571	-7.381	40
1928	yjaG	b3999	590	1.216	172.897	142.198	0.326	0.333	31.706	0.398	0.419	0.372	0.43	0.416	0.449	0.447	0.395	0.228	4.503	-2.881	43
1929	hupA	b4000	272	2.565	6826.65	2661.22	0.167	0.299	747.128	0.316	0.263	0.361	0.241	0.242	0.269	0.249	0.338	0.276	4.713	-7.381	187
1934	metA	b4013	929	0.977	532.254	544.8	0.239	0.35	111.825	0.417	0.445	0.376	0.475	0.48	0.459	0.454	0.41	0.217	4.005	-8.181	663
1935	aceB	b4014	1601	0.669	98.182	146.748	0.299	0.358	19.197	0.464	0.452	0.433	0.36	0.405	0.413	0.39	0.461	0.251	4.306	-7.781	269
1936	aceA	b4015	1304	1.342	204.417	152.274	0.298	0.384	18.367	0.42	0.407	0.412	0.309	0.309	0.316	0.327	0.425	0.255	4.192	-6.181	30
1938	metH	b4019	3683	0.907	172.202	189.756	0.31	0.394	21.778	0.456	0.444	0.46	0.425	0.417	0.39	0.425	0.455	0.256	4.518	-4.981	3496
1941	pgi	b4025	1649	1.489	665.6	446.899	0.234	0.351	89.147	0.376	0.375	0.376	0.333	0.265	0.35	0.317	0.381	0.265	4.042	-2.881	2532
1953	ubiC	b4039	497	0.639	67.384	105.498	0.353	0.334	18.612	0.496	0.499	0.468	0.607	0.53	0.558	0.583	0.486	0.209	3.35	-7.381	220
1954	ubiA	b4040	872	0.681	84.077	123.428	0.386	0.382	19.073	0.427	0.458	0.392	0.365	0.408	0.444	0.375	0.427	0.215	2.525	-6.181	13
1955	dgkA	b4042	368	1.551	174.217	112.328	0.384	0.356	20.607	0.41	0.431	0.385	0.281	0.341	0.379	0.31	0.424	0.204	2.463	-4.981	2749
1956	lexA	b4043	608	0.896	298.497	332.962	0.265	0.387	65.568	0.464	0.459	0.457	0.449	0.411	0.456	0.44	0.464	0.251	4.846	-10.181	110
1961	dusA	b4049	992	1.248	99.536	79.776	0.392	0.388	20.055	0.456	0.44	0.46	0.438	0.407	0.417	0.423	0.456	0.233	4.167	1.719	408
1963	dnaB	b4052	1415	0.344	78.812	229.164	0.299	0.374	29.644	0.503	0.486	0.465	0.448	0.43	0.453	0.469	0.504	0.264	4.448	-1.681	1232
1965	tyrB	b4054	1193	1.286	120.164	93.468	0.373	0.375	15.625	0.435	0.424	0.444	0.501	0.51	0.416	0.502	0.43	0.222	3.709	-6.181	253
1969	ssb	b4059	536	2.404	1232.91	512.928	0.248	0.411	111.339	0.422	0.388	0.437	0.324	0.312	0.319	0.348	0.433	0.27	4.75	-7.781	3111
1972	yjcD	b4064	1349	0.697	89.685	128.622	0.35	0.414	20.151	0.462	0.459	0.45	0.472	0.51	0.497	0.48	0.458	0.242	3.158	-6.881	546
1981	gltP	b4077	1313	0.451	82.154	182.071	0.305	0.392	28.282	0.422	0.418	0.426	0.316	0.348	0.401	0.336	0.425	0.239	2.959	-8.581	342
1986	proP	b4111	1502	0.659	74.474	113.093	0.361	0.367	21.297	0.426	0.442	0.409	0.38	0.376	0.371	0.375	0.427	0.229	2.948	-6.181	264
1994	groS	b4142	293	1.91	5888.91	3083.7	0.203	0.318	549.048	0.384	0.382	0.379	0.313	0.31	0.358	0.302	0.401	0.273	4.54	-9.881	1548
1995	groL	b4143	1646	1.673	6009.84	3591.33	0.187	0.362	604.885	0.382	0.365	0.399	0.236	0.322	0.34	0.287	0.383	0.316	5.148	-7.381	44
1996	yjeI	b4144	353	1.574	363.453	230.878	0.259	0.356	44.542	0.396	0.387	0.403	0.287	0.289	0.351	0.286	0.412	0.229	3.648	-5.281	138
1997	efp	b4147	566	1.745	3757.79	2153.41	0.18	0.348	487.393	0.402	0.408	0.394	0.341	0.36	0.394	0.347	0.402	0.267	4.684	-6.181	2537
2005	orn	b4162	545	2.025	280.518	138.529	0.337	0.352	31.505	0.413	0.433	0.383	0.398	0.438	0.431	0.44	0.407	0.254	5.142	-5.281	5586
2010	miaA	b4171	950	0.084	51.946	615.189	0.378	0.393	103.844	0.602	0.551	0.567	0.425	0.47	0.494	0.457	0.597	0.195	3.754	-0.881	-7
2011	hfq	b4172	308	2.465	3092.84	1254.87	0.201	0.322	322.877	0.406	0.387	0.419	0.353	0.455	0.403	0.417	0.394	0.208	3.797	-7.381	86
2012	hflX	b4173	1280	0.194	84.769	436.313	0.29	0.392	52.151	0.541	0.547	0.53	0.449	0.47	0.485	0.444	0.543	0.236	4.121	-6.581	76
2013	hflK	b4174	1259	0.649	352.175	542.928	0.24	0.397	78.75	0.462	0.463	0.459	0.337	0.422	0.419	0.364	0.462	0.266	5.084	-6.181	86
2014	hflC	b4175	1004	0.417	201.041	482.072	0.227	0.372	84.166	0.427	0.405	0.445	0.333	0.345	0.363	0.348	0.431	0.28	4.689	-10.181	3
2016	purA	b4177	1298	1.016	892.294	878.419	0.231	0.379	135.518	0.449	0.46	0.428	0.516	0.466	0.461	0.487	0.442	0.27	4.789	-1.981	104
2018	rnr	b4179	2441	0.886	132.426	149.522	0.338	0.394	17.793	0.472	0.48	0.463	0.413	0.415	0.396	0.442	0.474	0.271	4.727	-9.481	39
2019	rlmB	b4180	731	1.454	199.1	136.887	0.322	0.402	25.43	0.442	0.441	0.44	0.393	0.403	0.406	0.433	0.442	0.246	4.278	-2.881	180
2034	rpsF	b4200	395	1.481	14924.7	10075.7	0.153	0.337	1992.88	0.422	0.405	0.428	0.306	0.321	0.336	0.322	0.434	0.266	5.266	-9.981	732
2035	priB	b4201	314	0.01	81.729	7896.15	0.189	0.389	1499.8	0.56	0.59	0.515	0.534	0.559	0.564	0.526	0.553	0.175	2.163	-3.581	7
2036	rpsR	b4202	227	1.842	13484	7319.36	0.167	0.271	1677.64	0.396	0.328	0.452	0.37	0.336	0.324	0.361	0.407	0.287	2.761	-6.181	5
2037	rplI	b4203	449	1.021	9576.81	9376.87	0.165	0.347	1908.97	0.447	0.427	0.464	0.313	0.323	0.415	0.322	0.46	0.272	5.247	-6.981	42
2039	fklB	b4207	620	2.69	815.208	303.06	0.24	0.367	70.382	0.38	0.384	0.37	0.413	0.326	0.341	0.399	0.387	0.271	5.128	-6.081	837
2040	cycA	b4208	1412	0.55	61.946	112.724	0.352	0.381	17.021	0.417	0.418	0.415	0.397	0.445	0.421	0.406	0.412	0.224	2.184	-5.181	309
2044	ytfK	b4217	206	1.074	231.703	215.675	0.305	0.279	52.329	0.406	0.395	0.404	0.306	0.412	0.401	0.366	0.398	0.247	2.801	-7.781	942
2047	ytfP	b4222	341	0.662	162.499	245.442	0.261	0.353	50.731	0.452	0.434	0.467	0.306	0.329	0.369	0.314	0.476	0.201	3.568	-2.881	3
2054	mpl	b4233	1373	0.856	217.006	253.495	0.3	0.408	41.035	0.448	0.42	0.476	0.364	0.379	0.374	0.422	0.451	0.246	4.527	-6.081	1207
2055	pmbA	b4235	1352	1.679	219.111	130.511	0.341	0.384	21.127	0.429	0.428	0.422	0.54	0.324	0.365	0.475	0.427	0.241	4.256	-2.881	801
2061	rraB	b4255	416	2.116	976.059	461.175	0.258	0.299	111.779	0.385	0.368	0.405	0.359	0.291	0.352	0.361	0.399	0.259	8.275	-6.181	1222
2083	fimA	b4314	548	2.539	331.146	130.437	0.367	0.388	18.71	0.382	0.358	0.403	0.288	0.401	0.432	0.365	0.379	0.204	4.304	-6.081	482
2105	holD	b4372	413	0.185	40.975	222.004	0.339	0.386	30.372	0.495	0.489	0.479	0.46	0.431	0.47	0.506	0.493	0.185	2.99	-7.781	1763
2106	rimI	b4373	446	0.402	67.614	168.148	0.296	0.326	23.011	0.463	0.468	0.452	0.409	0.369	0.442	0.376	0.472	0.239	4.172	0.719	-31
2108	prfC	b4375	1589	1.235	580.814	470.152	0.231	0.372	85.072	0.405	0.394	0.416	0.395	0.494	0.418	0.413	0.402	0.266	4.903	-1.881	91
2115	deoB	b4383	1223	0.9	176.453	196.03	0.27	0.378	28.827	0.451	0.431	0.459	0.412	0.359	0.407	0.385	0.451	0.272	4.883	-6.181	52
2116	deoD	b4384	719	2.632	1160.34	440.785	0.229	0.329	82.061	0.394	0.377	0.409	0.239	0.258	0.323	0.256	0.405	0.289	4.193	-6.081	57
2118	serB	b4388	968	0.5	88.774	177.465	0.322	0.405	21.767	0.49	0.493	0.485	0.513	0.582	0.528	0.545	0.483	0.266	4.299	-7.781	1795
2122	trpR	b4393	326	1.797	155.46	86.517	0.352	0.35	15.936	0.454	0.45	0.454	0.371	0.4	0.431	0.388	0.467	0.255	4.331	-1.681	90
2123	ytjC	b4395	647	1.247	176.517	141.512	0.317	0.404	24.403	0.427	0.419	0.429	0.353	0.411	0.436	0.394	0.427	0.222	3.432	-3.581	711
2124	creA	b4397	473	1.107	128.698	116.273	0.416	0.319	18.304	0.377	0.343	0.399	0.222	0.303	0.302	0.269	0.387	0.239	4.139	-3.381	1077
2139	rpsT	b0023	263	1.252	14515.6	11597.6	0.206	0.287	2696.02	0.399	0.393	0.402	0.368	0.349	0.388	0.342	0.408	0.294	2.584	-6.181	13703
2147	apaG	b0050	377	0.101	16.431	163.323	0.397	0.353	27.275	0.615	0.488	0.579	0.492	0.489	0.476	0.471	0.624	0.189	3.034	-8.981	3
2149	pdxA	b0052	989	0.198	30.045	151.6	0.441	0.401	20.877	0.569	0.573	0.565	0.415	0.518	0.515	0.472	0.565	0.21	3.944	-2.881	0
2150	surA	b0053	1286	0.965	357.211	369.994	0.251	0.372	77.852	0.443	0.438	0.441	0.306	0.367	0.42	0.35	0.446	0.275	3.957	-2.281	53
2152	rluA	b0058	659	0.261	49.554	190.039	0.306	0.404	29.359	0.517	0.561	0.456	0.475	0.543	0.526	0.508	0.512	0.233	4.512	-6.181	12
2167	yacG	b0101	197	1.537	195.71	127.373	0.328	0.314	33.106	0.399	0.4	0.394	0.351	0.342	0.394	0.343	0.415	0.189	4.193	-9.981	10
2168	yacF	b0102	743	0.867	108.404	125.08	0.311	0.355	23.203	0.418	0.446	0.389	0.316	0.371	0.378	0.342	0.422	0.223	3.482	-5.181	0
2169	coaE	b0103	620	0.46	41.636	90.599	0.372	0.363	15.047	0.499	0.52	0.476	0.455	0.501	0.514	0.485	0.498	0.206	3.978	-3.581	1303
2174	aroP	b0112	1373	0.458	40.786	88.99	0.357	0.382	16.56	0.454	0.47	0.436	0.365	0.416	0.452	0.407	0.45	0.258	2.521	-7.881	7856
2176	speD	b0120	794	1.222	387.979	317.602	0.217	0.275	90.235	0.353	0.336	0.37	0.25	0.243	0.317	0.263	0.36	0.235	4.286	-9.981	16
2177	speE	b0121	866	1.024	418.27	408.376	0.227	0.333	84.701	0.39	0.39	0.381	0.321	0.281	0.305	0.309	0.396	0.23	4.366	-13.681	106
2180	can	b0126	662	1.699	676.041	397.805	0.22	0.332	101.163	0.382	0.376	0.376	0.326	0.292	0.314	0.333	0.389	0.245	3.835	-5.081	3644
2181	panD	b0131	380	2.147	1187.05	553.005	0.217	0.343	137.782	0.408	0.353	0.462	0.343	0.401	0.361	0.368	0.403	0.225	4.271	-4.881	1250
2182	panC	b0133	851	0.746	268.154	359.232	0.22	0.369	55.583	0.428	0.427	0.425	0.418	0.487	0.464	0.457	0.423	0.258	4.337	-9.981	12
2183	panB	b0134	794	1.959	599.735	306.115	0.24	0.372	52.019	0.393	0.379	0.406	0.338	0.307	0.319	0.336	0.398	0.263	4.296	-5.181	114
2192	pcnB	b0143	1397	0.502	168.958	336.54	0.248	0.377	49.709	0.446	0.449	0.427	0.347	0.393	0.487	0.375	0.446	0.264	3.86	NA	60
2194	dksA	b0145	455	1.445	1782.91	1233.51	0.193	0.35	289.667	0.399	0.36	0.433	0.322	0.343	0.324	0.381	0.406	0.283	5.603	-9.981	178
2197	hemL	b0154	1280	1.25	379.328	303.473	0.257	0.405	46.049	0.422	0.409	0.435	0.37	0.356	0.404	0.359	0.425	0.252	4.275	-5.181	2119
2200	mtn	b0159	698	1.597	555.994	348.256	0.272	0.366	79.841	0.431	0.433	0.414	0.399	0.446	0.472	0.464	0.412	0.247	3.721	-2.881	4556
2203	dapD	b0166	824	2.33	1213.69	520.996	0.235	0.375	105.247	0.388	0.368	0.402	0.262	0.353	0.355	0.335	0.389	0.27	4.202	-2.881	31
2205	map	b0168	794	1.567	782.501	499.364	0.213	0.343	130.487	0.406	0.397	0.414	0.346	0.406	0.413	0.395	0.406	0.258	4.461	-3.581	24172
2206	rof	b0189	254	0.86	111.595	129.762	0.402	0.326	26.145	0.452	0.456	0.441	0.292	0.434	0.457	0.407	0.46	0.233	4.922	-3.681	-7
2207	yaeP	b4406	200	0.519	70.729	136.222	0.308	0.29	29.124	0.429	0.424	0.432	0.29	0.373	0.424	0.361	0.452	0.234	3.838	-11.081	2054
2209	proS	b0194	1718	0.879	869.408	988.608	0.207	0.39	143.498	0.446	0.452	0.435	0.293	0.363	0.412	0.344	0.447	0.27	4.719	-3.581	112
2211	rcsF	b0196	404	3.082	269.558	87.448	0.284	0.296	24.304	0.363	0.356	0.37	0.312	0.303	0.302	0.332	0.372	0.212	2.576	-7.481	118
2212	metQ	b0197	815	1.572	2131.7	1356.02	0.208	0.322	497.303	0.351	0.323	0.372	0.266	0.262	0.277	0.244	0.357	0.279	4.83	-7.481	40
2213	metI	b0198	653	0.307	269.798	879.594	0.205	0.355	166.772	0.418	0.395	0.421	0.302	0.389	0.425	0.372	0.42	0.251	2.584	-7.881	-7
2214	metN	b0199	1031	1.04	1024.55	984.788	0.198	0.353	217.203	0.41	0.422	0.397	0.264	0.286	0.341	0.29	0.418	0.248	3.896	0.419	7322
2216	mltD	b0211	1358	0.31	61.302	197.793	0.325	0.382	46.52	0.519	0.532	0.503	0.449	0.466	0.478	0.467	0.52	0.24	3.279	-0.281	72
2223	yafK	b0224	740	1.646	205.815	125.025	0.308	0.319	34.721	0.369	0.359	0.376	0.366	0.437	0.413	0.375	0.361	0.239	2.959	-6.081	156
2227	pepD	b0237	1457	1.575	526.204	334.062	0.249	0.34	66.724	0.392	0.394	0.388	0.376	0.367	0.357	0.351	0.392	0.266	4.616	-8.681	2553
2293	frmB	b0355	833	0.71	64.155	90.352	0.404	0.358	47.723	0.42	0.415	0.425	0.392	0.429	0.4	0.389	0.417	0.212	3.454	-2.281	94
2294	frmA	b0356	1109	1.455	279.394	192.012	0.301	0.38	76.365	0.397	0.391	0.402	0.373	0.374	0.389	0.349	0.397	0.241	4.393	-7.481	35
2295	frmR	b0357	275	0.357	68.512	192.1	0.31	0.316	85.264	0.437	0.43	0.44	0.351	0.343	0.4	0.375	0.461	0.183	3.493	-8.581	188
2301	hemB	b0369	974	1.252	297.556	237.669	0.275	0.367	48.097	0.435	0.427	0.441	0.463	0.459	0.429	0.5	0.432	0.246	4.143	-3.281	2012
2306	ddlA	b0381	1094	1.592	383.416	240.861	0.271	0.36	49.588	0.393	0.395	0.387	0.31	0.251	0.316	0.312	0.396	0.235	4.337	-4.981	3912
2308	rdgC	b0393	911	1.402	226.746	161.71	0.304	0.345	37.582	0.42	0.391	0.447	0.433	0.435	0.364	0.442	0.419	0.27	4.437	-3.581	1278
2313	tsx	b0411	884	1.624	893.658	550.441	0.213	0.334	129.741	0.367	0.377	0.356	0.443	0.453	0.432	0.438	0.357	0.265	3.45	-1.981	299
2316	dxs	b0420	1862	0.55	68.819	125.024	0.347	0.387	21.351	0.456	0.45	0.461	0.376	0.443	0.461	0.41	0.456	0.253	4.53	-3.281	25
2317	ispA	b0421	899	0.547	91.898	167.997	0.302	0.378	26.639	0.464	0.464	0.463	0.367	0.433	0.442	0.386	0.466	0.222	4.301	-3.581	0
2318	xseB	b0422	242	1.204	219.714	182.442	0.274	0.312	39.848	0.447	0.459	0.397	0.45	0.467	0.478	0.446	0.431	0.267	5.851	-2.981	1708
2322	cyoE	b0428	890	0.137	222.816	1631.51	0.249	0.398	201.099	0.519	0.54	0.481	0.431	0.464	0.503	0.463	0.52	0.244	2.132	-4.981	12
2323	cyoD	b0429	329	0.701	1269.17	1810.85	0.197	0.344	286.909	0.419	0.436	0.4	0.351	0.354	0.419	0.342	0.434	0.267	2.137	-8.581	0
2324	cyoC	b0430	614	0.478	792.839	1658.12	0.214	0.391	202.348	0.426	0.445	0.397	0.312	0.315	0.396	0.307	0.435	0.244	2.528	-9.481	-10
2325	cyoB	b0431	1991	0.346	633.328	1829.2	0.206	0.373	209.526	0.426	0.439	0.412	0.329	0.395	0.421	0.362	0.421	0.256	2.372	-7.481	22
2326	cyoA	b0432	947	0.547	1101.14	2013.12	0.178	0.322	372.344	0.432	0.422	0.435	0.241	0.312	0.339	0.316	0.435	0.249	3.181	-7.881	460
2327	ampG	b0433	1475	0.236	19.145	81.255	0.395	0.387	15.704	0.52	0.48	0.53	0.468	0.441	0.503	0.48	0.52	0.211	2.039	0.019	44
2328	yajG	b0434	578	3.923	587.498	149.75	0.243	0.299	82.42	0.363	0.351	0.369	0.262	0.24	0.277	0.255	0.369	0.269	3.717	-2.981	10685
2329	queC	b0444	695	1.42	146.059	102.851	0.377	0.355	21.345	0.404	0.395	0.414	0.402	0.468	0.385	0.46	0.398	0.242	4.297	-5.181	65
2336	hha	b0460	218	2.043	331.148	162.064	0.309	0.193	38.47	0.355	0.317	0.33	0.279	0.312	0.333	0.297	0.34	0.269	3.484	-4.981	26
2338	acrB	b0462	3149	0.386	119.143	308.959	0.264	0.407	47.37	0.471	0.475	0.465	0.425	0.434	0.495	0.399	0.471	0.259	3.613	-7.781	23
2339	acrA	b0463	1193	1.302	436.294	334.979	0.247	0.362	67.079	0.419	0.391	0.426	0.405	0.383	0.366	0.368	0.42	0.248	4.307	-7.881	4491
2345	ybaK	b0481	479	1.816	88.464	48.712	0.406	0.342	16.292	0.427	0.388	0.465	0.317	0.286	0.325	0.316	0.443	0.259	4.827	-9.481	204
2350	ybbN	b0492	854	1.537	381.353	248.193	0.253	0.387	44.036	0.411	0.389	0.43	0.369	0.289	0.312	0.331	0.417	0.26	4.716	-3.981	61
2363	ppiB	b0525	494	1.884	1934.95	1027.14	0.209	0.304	241.566	0.368	0.339	0.391	0.299	0.266	0.318	0.29	0.379	0.285	4.23	-5.181	1595
2365	ybcJ	b0528	212	1.661	364.708	219.519	0.245	0.372	58.62	0.431	0.435	0.423	0.31	0.349	0.421	0.319	0.45	0.237	4.754	-5.181	2
2366	folD	b0529	866	1.681	292.735	174.173	0.266	0.373	44.976	0.429	0.443	0.41	0.315	0.36	0.401	0.345	0.432	0.246	4.063	-3.581	6107
2374	borD	b0557	293	2.42	2265.4	936.294	0.204	0.256	247.439	0.302	0.256	0.339	0.359	0.255	0.241	0.328	0.311	0.215	3.43	-3.581	291
2378	ompT	b0565	953	2.094	3655.27	1745.31	0.195	0.277	378.97	0.316	0.328	0.302	0.409	0.336	0.358	0.403	0.314	0.205	3.213	-6.181	514
2386	nfsB	b0578	653	3.343	513.53	153.631	0.239	0.347	57.338	0.396	0.392	0.4	0.426	0.399	0.36	0.418	0.393	0.247	5.008	-6.181	94
2396	ybdH	b0599	1088	1.013	101.757	100.471	0.354	0.384	27.458	0.424	0.426	0.419	0.312	0.354	0.351	0.305	0.429	0.212	4.23	-7.381	1270
2402	rnk	b0610	410	2.579	310.528	120.409	0.317	0.363	33.552	0.398	0.398	0.39	0.3	0.347	0.404	0.339	0.406	0.243	4.068	-6.181	230
2403	rna	b0611	806	2.027	113.053	55.787	0.391	0.342	15.048	0.422	0.439	0.405	0.461	0.531	0.513	0.484	0.414	0.207	3.346	-2.281	114
2413	lipA	b0628	965	1.483	907.711	612.007	0.233	0.356	119.768	0.408	0.399	0.418	0.331	0.385	0.4	0.332	0.407	0.252	4.257	-3.581	209
2415	lipB	b0630	641	0.986	73.138	74.202	0.345	0.318	18.919	0.453	0.441	0.436	0.539	0.452	0.416	0.493	0.451	0.206	3.528	-6.181	101
2416	ybeD	b0631	263	2.893	792.448	273.934	0.249	0.283	71.867	0.333	0.316	0.346	0.279	0.286	0.278	0.285	0.347	0.245	3.993	-6.181	110
2417	dacA	b0632	1211	1.446	338.308	233.91	0.263	0.339	58.613	0.392	0.395	0.386	0.362	0.368	0.387	0.359	0.39	0.258	3.641	-3.581	139
2418	rlpA	b0633	1088	0.892	161.548	181.157	0.289	0.372	27.675	0.458	0.456	0.456	0.441	0.39	0.428	0.441	0.459	0.207	3.55	-7.881	11
2419	mrdB	b0634	1112	0.307	33.404	108.731	0.397	0.368	18.111	0.502	0.456	0.533	0.38	0.395	0.4	0.398	0.509	0.244	2.618	-9.481	3
2420	mrdA	b0635	1901	0.241	28.5	118.495	0.355	0.359	20.662	0.457	0.443	0.468	0.342	0.389	0.465	0.406	0.458	0.248	3.985	-3.281	31
2422	ybeB	b0637	317	1.525	736.567	483.099	0.22	0.386	86.522	0.394	0.366	0.421	0.359	0.335	0.331	0.361	0.407	0.254	4.733	-10.181	260
2427	leuS	b0642	2582	1.358	757.891	558.11	0.229	0.376	73.15	0.425	0.413	0.431	0.328	0.312	0.31	0.32	0.427	0.276	4.455	-5.181	787
2435	gltI	b0655	908	1.461	101.888	69.73	0.39	0.316	15.658	0.385	0.393	0.376	0.368	0.349	0.389	0.351	0.387	0.28	4.146	-8.681	250
2438	ybeX	b0658	878	0.564	144.656	256.657	0.273	0.342	35.068	0.486	0.483	0.476	0.309	0.348	0.431	0.36	0.496	0.259	5.417	-2.281	90
2439	ybeY	b0659	467	0.815	184.18	226.057	0.251	0.371	32.335	0.447	0.477	0.414	0.238	0.299	0.424	0.294	0.463	0.235	5.611	-5.181	-3
2440	ybeZ	b0660	1040	1.189	256.019	215.324	0.27	0.377	35.071	0.426	0.444	0.405	0.293	0.386	0.412	0.351	0.427	0.269	4.65	-6.181	153
2441	miaB	b0661	1424	1.463	421.246	287.869	0.256	0.382	53.731	0.431	0.449	0.412	0.264	0.325	0.358	0.315	0.437	0.265	4.727	-2.881	2558
2443	nagD	b0675	752	1.131	155.982	137.958	0.325	0.362	24.91	0.438	0.414	0.452	0.409	0.43	0.432	0.432	0.436	0.246	4.054	-3.381	48
2447	fur	b0683	446	0.92	634.629	690.149	0.215	0.305	167.025	0.413	0.412	0.407	0.348	0.399	0.403	0.364	0.412	0.245	5.275	-5.181	-7
2449	fldA	b0684	530	2.518	1253.62	497.952	0.224	0.324	143.849	0.393	0.36	0.422	0.285	0.287	0.352	0.278	0.4	0.258	5.547	-7.881	140
2450	ybfE	b0685	293	1.105	108.24	97.938	0.291	0.313	23.439	0.464	0.417	0.51	0.322	0.406	0.427	0.384	0.475	0.236	4.07	-0.881	140
2468	gltA	b0720	1283	0.92	179.862	195.606	0.291	0.33	30.519	0.425	0.424	0.42	0.342	0.297	0.359	0.324	0.425	0.261	4.001	-9.981	10685
2472	gpmA	b0755	752	1.897	2289.44	1207.12	0.197	0.345	218.728	0.355	0.34	0.366	0.335	0.265	0.304	0.291	0.361	0.263	4.771	-10.081	202
2473	galM	b0756	1040	0.701	124.321	177.445	0.288	0.388	23.792	0.464	0.475	0.454	0.447	0.509	0.509	0.449	0.461	0.231	4.007	-8.681	-6
2481	ybhC	b0772	1283	1.003	282.618	281.816	0.285	0.372	46.109	0.434	0.429	0.434	0.35	0.415	0.407	0.392	0.435	0.237	4.129	-6.181	152
2482	ybhB	b0773	476	0.343	56.001	163.246	0.343	0.383	27.744	0.488	0.496	0.471	0.362	0.434	0.444	0.426	0.481	0.22	4.938	-11.981	59
2483	bioA	b0774	1289	1.022	214.184	209.552	0.298	0.398	43.088	0.441	0.433	0.443	0.434	0.389	0.442	0.414	0.443	0.234	4.063	-1.681	3857
2504	dps	b0812	503	2.046	201.799	98.609	0.355	0.306	24.224	0.36	0.329	0.386	0.331	0.225	0.299	0.313	0.376	0.273	4.751	-5.181	299
2507	ybiS	b0819	920	1.992	423.389	212.564	0.235	0.366	59.876	0.384	0.375	0.392	0.343	0.355	0.417	0.343	0.385	0.25	4.215	-1.681	2052
2522	grxA	b0849	257	2.309	166.248	72.009	0.378	0.28	24.306	0.409	0.401	0.386	0.403	0.368	0.383	0.412	0.4	0.239	5.61	-10.081	9091
2526	artI	b0863	731	1.756	266.869	151.965	0.294	0.324	31.239	0.371	0.385	0.358	0.334	0.348	0.357	0.338	0.372	0.271	4.435	-3.581	18
2527	artP	b0864	728	0.919	106.381	115.814	0.32	0.343	20.866	0.429	0.446	0.411	0.349	0.364	0.402	0.376	0.436	0.249	4.187	-2.581	218
2537	ybjX	b0877	992	1.542	363.311	235.585	0.311	0.338	38.101	0.407	0.423	0.391	0.851	0.622	0.506	0.697	0.391	0.222	2.595	-1.681	3246
2538	cspD	b0880	224	0.885	87.394	98.719	0.389	0.305	17.702	0.45	0.457	0.439	0.302	0.424	0.466	0.378	0.455	0.226	4.463	-7.181	3635
2539	infA	b0884	218	1.737	2869.15	1651.78	0.205	0.276	341.018	0.379	0.382	0.367	0.343	0.374	0.387	0.368	0.371	0.292	3.927	-6.181	285
2543	trxB	b0888	965	1.021	709.363	694.954	0.215	0.366	129.234	0.429	0.456	0.399	0.346	0.387	0.462	0.402	0.431	0.255	4.638	-5.281	12881
2546	pflA	b0902	740	1.744	136.95	78.548	0.317	0.352	19.337	0.416	0.414	0.414	0.336	0.446	0.444	0.423	0.412	0.259	4.926	-6.181	192
2547	pflB	b0903	2282	1.267	764.556	603.588	0.213	0.333	93.303	0.4	0.393	0.406	0.313	0.309	0.347	0.304	0.4	0.295	3.935	-9.881	55
2549	ycaO	b0905	1760	1.419	337.513	237.891	0.247	0.356	43.698	0.41	0.4	0.416	0.466	0.462	0.416	0.487	0.407	0.25	4.749	-2.281	15990
2551	aspC	b0928	1190	2.987	436.365	146.073	0.293	0.358	38.983	0.413	0.398	0.423	0.416	0.467	0.444	0.437	0.41	0.253	4.042	-3.581	185
2552	ompF	b0929	1088	1.986	6809	3428.82	0.197	0.336	1028.94	0.381	0.397	0.361	0.362	0.425	0.372	0.389	0.377	0.273	4.267	-5.581	603
2553	asnS	b0930	1400	1.119	1182.5	1056.55	0.211	0.371	172.016	0.428	0.419	0.433	0.363	0.443	0.447	0.404	0.426	0.253	4.855	-3.981	169
2554	pncB	b0931	1202	0.678	220.571	325.264	0.263	0.342	54.699	0.433	0.432	0.425	0.393	0.43	0.432	0.414	0.426	0.212	3.955	-5.181	2921
2561	fabA	b0954	518	1.529	1937.6	1267.39	0.234	0.385	290.239	0.417	0.377	0.451	0.305	0.283	0.335	0.327	0.435	0.296	4.628	-5.481	69
2562	ycbZ	b0955	1760	0.652	72.324	110.904	0.336	0.367	19.299	0.461	0.47	0.45	0.417	0.485	0.471	0.462	0.459	0.221	3.705	0.419	714
2563	ompA	b0957	1040	1.253	13316.4	10625.7	0.188	0.368	2254.69	0.4	0.393	0.404	0.293	0.378	0.369	0.336	0.401	0.274	3.871	-6.781	357
2567	mgsA	b0963	458	2.708	268.179	99.022	0.315	0.362	29.098	0.409	0.372	0.427	0.381	0.312	0.326	0.371	0.418	0.244	3.362	-4.681	96
2569	hspQ	b0966	317	0.343	91.344	266.568	0.241	0.372	44.805	0.523	0.572	0.478	0.486	0.489	0.541	0.488	0.522	0.225	4.583	-11.181	58
2571	yccK	b0969	329	1.459	138.897	95.183	0.357	0.328	20.873	0.425	0.408	0.435	0.357	0.357	0.406	0.364	0.44	0.242	4.574	-7.381	91
2572	yccA	b0970	659	0.945	390.367	413.18	0.237	0.34	97.953	0.393	0.351	0.432	0.29	0.349	0.31	0.354	0.398	0.24	2.553	-3.981	10612
2614	bssS	b1060	254	0.116	16.368	140.749	0.33	0.302	34.996	0.408	0.401	0.412	0.37	0.354	0.393	0.37	0.425	0.221	4.289	-10.181	287
2615	dinI	b1061	245	2.208	215.369	97.541	0.324	0.341	33.252	0.455	0.482	0.411	0.417	0.472	0.516	0.507	0.431	0.199	3.927	-10.181	74
2616	pyrC	b1062	1046	2.184	294.036	134.651	0.273	0.341	32.009	0.39	0.401	0.378	0.394	0.353	0.375	0.385	0.392	0.229	3.768	-6.181	106
2623	rne	b1084	3185	1.083	289.932	267.809	0.255	0.38	40.553	0.434	0.431	0.436	0.26	0.265	0.36	0.289	0.436	0.254	4.93	-3.481	1644
2632	potD	b1123	1046	1.172	615.391	525.226	0.237	0.337	102.622	0.391	0.395	0.387	0.398	0.483	0.411	0.441	0.383	0.264	4.224	-6.881	-3
2633	potC	b1124	794	0.313	94.759	302.63	0.352	0.377	39.191	0.486	0.422	0.506	0.493	0.458	0.445	0.495	0.481	0.224	2.247	-7.781	-3
2634	potB	b1125	827	0.31	90.92	293.432	0.277	0.334	34.389	0.463	0.455	0.464	0.454	0.49	0.47	0.474	0.459	0.251	2.163	-2.181	14
2635	potA	b1126	1136	0.824	348.74	423.422	0.255	0.343	62.418	0.424	0.429	0.419	0.309	0.299	0.339	0.336	0.431	0.256	4.631	-0.081	1525
2636	ycfD	b1128	1121	1.244	153.739	123.54	0.313	0.378	27.346	0.427	0.425	0.429	0.428	0.38	0.389	0.433	0.43	0.217	4.883	-3.581	76
2638	phoP	b1130	671	1.912	203	106.152	0.321	0.297	20.71	0.393	0.36	0.42	0.414	0.307	0.311	0.389	0.399	0.229	4.921	-8.381	169
2639	purB	b1131	1370	1.757	496.795	282.731	0.252	0.353	57.096	0.398	0.387	0.406	0.377	0.502	0.506	0.466	0.392	0.257	4.207	-6.181	4
2640	hflD	b1132	641	0.485	63.776	131.615	0.301	0.38	25.358	0.498	0.481	0.494	0.432	0.5	0.495	0.459	0.498	0.233	3.441	-6.081	36
2641	mnmA	b1133	1106	0.973	214.876	220.942	0.27	0.36	35.465	0.446	0.44	0.433	0.482	0.451	0.45	0.489	0.434	0.258	4.986	-2.881	54
2659	minE	b1174	266	0.868	341.094	392.767	0.275	0.276	82.438	0.38	0.36	0.396	0.344	0.348	0.366	0.338	0.394	0.239	4.813	-9.481	4
2660	minD	b1175	812	0.962	393.101	408.568	0.249	0.359	78.166	0.406	0.401	0.41	0.343	0.39	0.403	0.377	0.406	0.252	4.722	-6.081	24
2661	minC	b1176	695	0.478	88.799	185.934	0.321	0.349	35.168	0.448	0.433	0.461	0.311	0.322	0.333	0.32	0.459	0.214	3.841	-7.581	991
2664	dsbB	b1185	530	0.877	150.961	172.149	0.307	0.373	31.942	0.45	0.425	0.47	0.4	0.32	0.359	0.389	0.459	0.215	2.339	-5.781	146
2665	nhaB	b1186	1541	0.739	49.062	66.398	0.343	0.378	15.597	0.433	0.444	0.421	0.396	0.579	0.497	0.507	0.427	0.245	2.749	-5.481	992
2675	ychF	b1203	1091	1.736	907.861	523.013	0.219	0.341	105.77	0.385	0.367	0.401	0.298	0.351	0.371	0.314	0.386	0.278	4.992	-5.781	117
2676	pth	b1204	584	0.994	148.1	149.058	0.308	0.349	28.815	0.44	0.473	0.404	0.425	0.429	0.441	0.433	0.441	0.201	3.701	-5.181	611
2678	prs	b1207	947	0.942	1325.37	1406.89	0.191	0.366	246.321	0.456	0.434	0.474	0.307	0.344	0.383	0.333	0.463	0.265	4.072	-7.881	151
2680	lolB	b1209	623	1.446	109.34	75.596	0.351	0.328	17.502	0.427	0.428	0.415	0.422	0.422	0.424	0.44	0.419	0.246	3.574	-6.081	5668
2685	ychN	b1219	353	2.497	231.374	92.648	0.354	0.344	26.325	0.389	0.355	0.419	0.352	0.312	0.347	0.344	0.401	0.21	3.267	-7.781	1580
2689	purU	b1232	842	1.633	432.517	264.784	0.285	0.319	59.291	0.373	0.386	0.358	0.279	0.325	0.326	0.303	0.374	0.229	3.7	-4.181	50
2690	ychJ	b1233	458	0.709	87.729	123.707	0.352	0.321	29.359	0.435	0.4	0.459	0.413	0.397	0.417	0.433	0.438	0.17	2.798	-8.381	3377
2691	hns	b1237	413	10.654	8408.88	789.253	0.185	0.277	693.983	0.354	0.323	0.38	0.268	0.286	0.266	0.296	0.364	0.283	5.262	-2.281	2215
2695	adhE	b1241	2675	1.795	314.038	174.966	0.262	0.343	26.717	0.404	0.399	0.406	0.356	0.373	0.321	0.376	0.405	0.258	3.998	-7.781	7501
2696	yciU	b1248	329	0.621	68.271	109.878	0.369	0.335	16.803	0.455	0.447	0.457	0.297	0.341	0.419	0.346	0.478	0.224	6.34	-5.181	35
2700	yciA	b1253	398	1.35	212.864	157.703	0.289	0.342	38.634	0.428	0.411	0.442	0.467	0.408	0.396	0.46	0.43	0.21	3.523	-6.981	105
2701	yciB	b1254	539	0.737	40.665	55.211	0.38	0.323	18.428	0.417	0.395	0.43	0.309	0.362	0.402	0.35	0.421	0.223	1.768	-3.581	30
2702	yciC	b1255	743	0.808	52.262	64.653	0.378	0.349	16.622	0.44	0.4	0.476	0.303	0.393	0.409	0.35	0.444	0.218	1.722	-9.881	1055
2714	yciN	b1273	251	3.448	557.96	161.822	0.247	0.277	62.091	0.355	0.347	0.354	0.356	0.314	0.345	0.336	0.37	0.249	5.345	-9.981	7902
2715	ribA	b1277	590	1.588	185.252	116.647	0.34	0.339	34.125	0.413	0.431	0.385	0.414	0.432	0.396	0.427	0.405	0.251	4.51	-6.181	3950
2717	yciT	b1284	749	2.002	126.604	63.247	0.327	0.326	18.564	0.41	0.4	0.421	0.291	0.331	0.364	0.324	0.416	0.211	3.81	-2.181	90
2720	rnb	b1286	1934	1.288	418.296	324.887	0.242	0.354	57.481	0.423	0.415	0.43	0.406	0.39	0.401	0.393	0.423	0.253	4.651	0.019	68
2722	fabI	b1288	788	1.892	3199	1690.48	0.175	0.361	338.444	0.377	0.361	0.39	0.269	0.323	0.313	0.312	0.38	0.261	4.035	-7.381	368
2734	tpx	b1324	506	2.67	3565.13	1335.04	0.189	0.33	380.095	0.377	0.348	0.402	0.347	0.373	0.354	0.354	0.378	0.244	4.1	-5.181	1059
2740	fnr	b1334	752	1.121	597.964	533.235	0.25	0.339	118.782	0.413	0.391	0.428	0.405	0.383	0.419	0.425	0.411	0.256	3.106	-2.881	195
2746	ttcA	b1344	935	1.758	331.786	188.772	0.286	0.337	47.879	0.383	0.387	0.373	0.212	0.278	0.386	0.276	0.388	0.244	3.998	-2.881	52
2766	hslJ	b1379	422	1.421	99.514	70.042	0.392	0.312	15.983	0.423	0.426	0.419	0.313	0.362	0.388	0.317	0.426	0.26	4.686	-2.881	111
2767	ldhA	b1380	989	1.423	188.746	132.597	0.4	0.339	18.938	0.425	0.427	0.419	0.359	0.352	0.375	0.372	0.428	0.27	4.282	-6.181	3535
2801	maeA	b1479	1697	1.065	102.116	95.847	0.365	0.365	20.38	0.419	0.405	0.433	0.266	0.325	0.374	0.303	0.424	0.259	3.769	-2.881	157
2852	gnsB	b1550	173	5.098	353.709	69.383	0.353	0.153	45.167	0.331	0.274	0.316	0.247	0.278	0.304	0.301	0.308	0.25	4.514	-6.181	172
2863	hokD	b1562	155	0.026	2.199	85.11	0.361	0.346	18.551	0.623	0.532	0.677	0.509	0.556	0.592	0.538	0.65	0.175	2.082	-7.781	72
2864	relE	b1563	287	0.626	32.829	52.471	0.359	0.299	17.372	0.443	0.45	0.423	0.408	0.378	0.415	0.406	0.452	0.209	3.834	-3.581	0
2865	relB	b1564	239	2.299	211.008	91.799	0.372	0.272	19.742	0.43	0.509	0.348	0.474	0.576	0.522	0.535	0.366	0.229	4.412	-7.881	1250
2878	pntB	b1602	1388	0.27	53.712	198.714	0.298	0.377	24.267	0.459	0.453	0.46	0.392	0.386	0.49	0.369	0.461	0.247	3.554	-9.981	11
2879	pntA	b1603	1532	0.864	180.754	209.286	0.291	0.378	30.701	0.46	0.458	0.441	0.302	0.367	0.363	0.348	0.464	0.236	3.875	-5.681	3792
2882	fumA	b1612	1646	1.822	176.745	97.019	0.326	0.359	17.86	0.421	0.409	0.433	0.328	0.343	0.39	0.331	0.423	0.245	4.384	-6.181	3209
2891	tyrS	b1637	1274	1.165	605.738	520.025	0.241	0.366	101.336	0.422	0.437	0.396	0.336	0.363	0.368	0.372	0.424	0.257	4.015	-6.181	129
2892	pdxH	b1638	656	0.971	89.007	91.621	0.37	0.334	16.527	0.451	0.446	0.449	0.431	0.375	0.445	0.416	0.46	0.217	4.16	0.019	59
2895	slyA	b1642	434	1.346	112.661	83.694	0.325	0.306	26.455	0.394	0.381	0.405	0.333	0.36	0.386	0.356	0.396	0.238	2.676	-9.981	3310
2899	grxD	b1654	347	2.582	1284.48	497.533	0.195	0.343	147.911	0.347	0.292	0.386	0.233	0.218	0.26	0.234	0.371	0.272	4.154	-7.481	2020
2903	ribC	b1662	641	1.596	208.064	130.391	0.34	0.336	32.19	0.391	0.385	0.392	0.309	0.287	0.395	0.274	0.398	0.24	4.322	-7.781	1629
2911	ydhZ	b1675	209	1.286	136.31	105.995	0.388	0.256	19.814	0.393	0.321	0.441	0.396	0.282	0.321	0.379	0.413	0.248	4.622	-4.981	2580
2930	ihfA	b1712	299	0.557	607.194	1090.32	0.21	0.317	211.933	0.416	0.36	0.42	0.266	0.314	0.316	0.306	0.433	0.241	5.462	-5.781	5
2931	pheT	b1713	2387	1.201	879.611	732.557	0.244	0.39	82.046	0.464	0.432	0.481	0.268	0.364	0.398	0.315	0.466	0.258	4.663	-9.481	15
2932	pheS	b1714	983	0.985	681.707	692.401	0.221	0.364	73.978	0.425	0.438	0.397	0.397	0.332	0.356	0.37	0.428	0.257	4.306	-6.181	284
2934	rplT	b1716	356	1.001	13177.5	13162.1	0.186	0.331	3079.57	0.436	0.4	0.458	0.452	0.367	0.409	0.384	0.449	0.302	2.311	-7.781	53
2935	rpmI	b1717	197	1.522	18444.2	12121	0.166	0.286	3229.46	0.424	0.421	0.421	0.418	0.422	0.421	0.406	0.413	0.307	3.543	-4.681	97
2936	infC	b1718	542	0.243	2122.99	8724.62	0.404	0.334	1758.45	0.638	0.455	0.563	0.336	0.371	0.379	0.351	0.631	0.256	4.654	NA	4
2937	thrS	b1719	1928	0.944	1293.56	1369.68	0.249	0.346	165.555	0.487	0.408	0.544	0.342	0.336	0.384	0.344	0.491	0.258	4.376	-7.381	2755
2938	ydiY	b1722	758	1.266	420.608	332.163	0.269	0.338	53.062	0.399	0.427	0.371	0.434	0.441	0.461	0.425	0.393	0.21	3.52	-3.581	2614
2959	topB	b1763	1961	0.278	39.6	142.295	0.353	0.409	17.357	0.516	0.512	0.486	0.416	0.487	0.527	0.439	0.513	0.22	4.108	-2.281	5
2960	selD	b1764	1043	1.037	265.824	256.318	0.265	0.394	39.287	0.44	0.422	0.457	0.361	0.335	0.362	0.372	0.446	0.246	4.47	-7.781	117
2961	ydjA	b1765	551	1.868	220.354	117.932	0.34	0.371	25.292	0.452	0.439	0.464	0.426	0.394	0.426	0.437	0.458	0.247	4.149	-7.781	3945
2970	yeaC	b1777	272	1.263	235.915	186.785	0.298	0.267	36.568	0.317	0.345	0.29	0.246	0.3	0.341	0.291	0.316	0.26	3.908	-7.781	42
2971	msrB	b1778	413	1.632	264.292	161.99	0.307	0.289	30.995	0.378	0.388	0.366	0.323	0.322	0.351	0.325	0.386	0.232	3.785	-3.181	2353
2973	mipA	b1782	746	2.305	1691.39	733.948	0.209	0.338	170.056	0.372	0.381	0.362	0.32	0.39	0.411	0.374	0.368	0.26	3.853	-7.381	7606
2982	rnd	b1804	1127	0.794	71.15	89.606	0.376	0.379	16.33	0.461	0.487	0.434	0.444	0.566	0.54	0.507	0.452	0.232	3.746	-3.481	70
2984	yeaY	b1806	581	0.382	56.473	147.655	0.303	0.391	27.577	0.459	0.457	0.46	0.313	0.298	0.387	0.331	0.474	0.235	4.176	-8.681	40
2985	yeaZ	b1807	695	0.814	159.468	196.021	0.292	0.405	31.019	0.472	0.486	0.453	0.515	0.564	0.555	0.526	0.462	0.207	4.481	-2.181	58
2990	cspC	b1823	209	4.085	10240.5	2506.58	0.205	0.31	862.21	0.333	0.284	0.375	0.218	0.199	0.277	0.216	0.37	0.252	4.194	-7.381	13
2992	yebO	b1825	287	0.713	187.84	263.483	0.302	0.289	53.358	0.41	0.396	0.408	0.499	0.416	0.421	0.488	0.391	0.22	3.643	-7.881	75
2994	kdgR	b1827	791	1.115	188.573	169.136	0.33	0.334	29.717	0.412	0.415	0.404	0.365	0.408	0.404	0.385	0.41	0.239	4.263	-7.881	1596
2995	htpX	b1829	881	0.626	246.956	394.725	0.219	0.377	72.744	0.417	0.429	0.404	0.432	0.439	0.405	0.45	0.415	0.237	3.478	-5.581	192
2996	prc	b1830	2048	0.547	154.741	282.936	0.298	0.36	51.48	0.477	0.495	0.458	0.563	0.635	0.584	0.624	0.467	0.253	4.87	-6.181	20
2997	proQ	b1831	698	1.114	1276.58	1145.84	0.201	0.35	229.631	0.404	0.413	0.392	0.269	0.337	0.429	0.327	0.407	0.242	4.788	-5.181	97
2998	yebR	b1832	497	1.043	233.803	224.157	0.301	0.366	46.199	0.426	0.438	0.409	0.345	0.418	0.446	0.4	0.424	0.207	3.891	-2.281	6185
3000	yebY	b1839	341	1.686	188.512	111.815	0.349	0.288	29.026	0.407	0.399	0.41	0.346	0.391	0.388	0.377	0.41	0.185	3.49	-3.581	13
3001	yebZ	b1840	872	0.122	10.803	88.889	0.354	0.365	15.414	0.493	0.466	0.506	0.443	0.42	0.489	0.465	0.497	0.206	1.893	-0.281	4
3002	yobA	b1841	374	3.689	297.149	80.547	0.35	0.313	26.411	0.351	0.301	0.383	0.339	0.286	0.295	0.33	0.358	0.196	3.312	-6.081	1810
3005	yebF	b1847	356	0.126	11.429	90.682	0.372	0.346	17.854	0.474	0.496	0.45	0.45	0.47	0.484	0.461	0.472	0.217	4.419	-6.181	67
3006	yebG	b1848	290	1.402	157.144	112.054	0.392	0.28	22.777	0.366	0.341	0.387	0.398	0.351	0.34	0.36	0.363	0.256	5.937	-6.281	1368
3007	eda	b1850	641	1.838	764.14	415.796	0.239	0.388	82.631	0.388	0.371	0.396	0.303	0.322	0.327	0.343	0.395	0.261	4.293	-2.881	37
3009	zwf	b1852	1475	1.493	409.908	274.463	0.249	0.354	54.963	0.401	0.402	0.4	0.356	0.41	0.422	0.39	0.4	0.264	4.337	-9.981	2908
3012	znuA	b1857	932	2.327	6156.54	2645.9	0.196	0.346	33.957	0.372	0.372	0.372	0.399	0.365	0.416	0.408	0.372	0.193	4.513	-3.381	1763
3015	ruvC	b1863	521	0.081	33.217	411.714	0.247	0.417	61.661	0.528	0.546	0.507	0.505	0.616	0.632	0.572	0.508	0.237	3.83	-6.181	35
3016	yebC	b1864	740	1.517	1169.82	771.167	0.216	0.355	123.265	0.377	0.365	0.387	0.305	0.304	0.288	0.336	0.385	0.281	5.668	-6.181	29
3017	nudB	b1865	452	0.044	23.084	519.747	0.248	0.393	51.817	0.555	0.558	0.547	0.565	0.499	0.551	0.532	0.56	0.212	4.424	-6.181	118
3018	aspS	b1866	1772	1.32	713.221	540.323	0.234	0.371	66.796	0.415	0.412	0.417	0.297	0.275	0.331	0.273	0.417	0.282	4.623	-5.481	4056
3045	yecJ	b4537	251	7.906	229.636	29.046	0.254	0.252	27.599	0.38	0.377	0.346	0.406	0.409	0.385	0.409	0.363	0.229	4.425	-7.781	1493
3050	uvrY	b1914	656	0.375	95.092	253.79	0.318	0.338	34.642	0.451	0.502	0.395	0.405	0.452	0.416	0.439	0.452	0.221	2.968	-6.181	751
3055	fliY	b1920	800	2.109	110.589	52.433	0.4	0.334	45.965	0.379	0.372	0.378	0.372	0.278	0.376	0.376	0.383	0.267	5.495	-6.981	88
3059	yedD	b1928	413	1.757	448.994	255.56	0.269	0.399	48.326	0.449	0.433	0.466	0.467	0.397	0.476	0.451	0.447	0.245	4.414	-3.681	3947
3090	yeeX	b2007	329	2.305	829.098	359.682	0.238	0.274	118.288	0.34	0.322	0.355	0.308	0.371	0.333	0.337	0.333	0.325	5.057	-7.781	172
3094	yeeD	b2012	227	2.008	68.744	34.236	0.4	0.303	20.89	0.395	0.405	0.371	0.337	0.437	0.409	0.385	0.377	0.234	4.648	-5.981	14
3096	yeeF	b2014	1358	0.531	838.81	1580.08	0.21	0.366	267.595	0.415	0.397	0.433	0.339	0.371	0.383	0.392	0.417	0.256	2.834	-8.681	267
3101	cld	b2027	980	0.643	380.22	591.091	0.239	0.319	146.147	0.348	0.332	0.365	0.286	0.295	0.325	0.334	0.351	0.228	3.676	-3.681	146
3103	gnd	b2029	1406	1.293	2021.96	1563.65	0.186	0.346	324.529	0.365	0.351	0.378	0.266	0.329	0.366	0.297	0.365	0.26	4.215	-7.781	1673
3107	wbbK	b2032	1118	0.784	54.43	69.382	0.344	0.242	32.097	0.335	0.332	0.335	0.335	0.412	0.352	0.371	0.327	0.194	2.465	-2.881	-15
3108	wbbJ	b2033	590	0.58	77.553	133.796	0.301	0.272	40.489	0.369	0.356	0.378	0.232	0.24	0.274	0.24	0.38	0.175	2.53	-8.581	-19
3109	wbbI	b2034	992	1.92	214.178	111.544	0.304	0.262	54.942	0.315	0.321	0.308	0.244	0.31	0.304	0.294	0.313	0.171	2.994	-0.081	3
3110	rfc	b2035	1166	0.205	15.6	76.108	0.371	0.246	26.081	0.39	0.36	0.399	0.325	0.357	0.4	0.37	0.391	0.18	0.139	-3.281	0
3111	glf	b2036	1103	2.091	278.185	133.014	0.321	0.25	52.555	0.308	0.32	0.282	0.273	0.256	0.241	0.284	0.309	0.2	3.561	-6.181	8
3112	rfbX	b2037	1247	0.373	39.87	106.844	0.345	0.258	34.087	0.402	0.351	0.45	0.19	0.257	0.314	0.237	0.408	0.179	0.098	0.419	-3
3113	rfbC	b2038	557	0.884	163.241	184.722	0.266	0.286	48.984	0.334	0.34	0.325	0.207	0.24	0.292	0.237	0.335	0.176	4.087	-6.081	0
3114	rfbA	b2039	881	1.42	345.215	243.122	0.268	0.305	56.694	0.346	0.36	0.331	0.229	0.243	0.266	0.231	0.351	0.214	3.583	-6.081	58
3115	rfbD	b2040	899	1.29	333.57	258.672	0.241	0.296	63.174	0.402	0.392	0.385	0.318	0.429	0.418	0.418	0.396	0.207	3.64	-5.581	0
3116	rfbB	b2041	1085	1.433	466.509	325.516	0.241	0.307	81.356	0.349	0.342	0.355	0.261	0.286	0.281	0.27	0.35	0.201	4.193	-3.581	373
3117	galF	b2042	893	0.9	557.889	620.005	0.23	0.346	119.464	0.417	0.446	0.383	0.406	0.388	0.439	0.408	0.412	0.248	3.742	-6.881	175
3139	dcd	b2065	581	0.496	121.913	246.002	0.284	0.446	38.077	0.51	0.5	0.492	0.434	0.434	0.464	0.467	0.517	0.214	4.175	-8.681	92
3140	udk	b2066	641	1.3	287.225	220.916	0.305	0.321	44.69	0.427	0.41	0.443	0.323	0.369	0.362	0.368	0.43	0.239	4.113	-3.381	3744
3151	gatC	b2092	1355	0.544	83.515	153.591	0.297	0.387	26.071	0.439	0.415	0.461	0.313	0.359	0.333	0.36	0.442	0.222	3.022	-7.781	4
3152	gatB	b2093	284	0.741	121.643	164.05	0.312	0.297	32.186	0.399	0.403	0.388	0.398	0.495	0.39	0.41	0.373	0.206	2.543	-6.081	31
3153	gatA	b2094	452	0.903	195.172	216.194	0.292	0.279	32.256	0.373	0.39	0.355	0.373	0.359	0.348	0.358	0.375	0.189	3.735	-11.181	10
3154	gatZ	b2095	1262	1.074	375.958	350.073	0.261	0.336	51.743	0.392	0.388	0.369	0.373	0.366	0.384	0.364	0.39	0.211	4.054	-6.081	29
3155	gatY	b2096	854	1.038	547.021	526.851	0.246	0.375	80.453	0.414	0.406	0.396	0.338	0.331	0.31	0.379	0.417	0.219	4.089	-5.181	308
3167	mrp	b2113	1109	1.2	396.367	330.346	0.252	0.384	56.83	0.43	0.432	0.424	0.406	0.446	0.407	0.431	0.429	0.245	3.942	-8.681	17558
3168	yehS	b2124	470	1.208	71.906	59.523	0.381	0.323	15.431	0.47	0.465	0.464	0.526	0.461	0.482	0.483	0.464	0.265	3.793	-2.381	47
3176	pbpG	b2134	932	1.361	85.845	63.093	0.409	0.35	15.55	0.463	0.465	0.46	0.33	0.403	0.446	0.385	0.466	0.223	3.681	-0.281	174
3187	folE	b2153	668	2.288	1808.01	790.347	0.216	0.32	148.531	0.367	0.365	0.369	0.33	0.367	0.364	0.352	0.366	0.231	4.363	-7.781	1126
3189	lysP	b2156	1469	0.497	97.126	195.359	0.278	0.395	38.366	0.445	0.46	0.416	0.435	0.417	0.458	0.445	0.444	0.25	2.685	-3.581	205
3200	yejG	b2181	344	1.23	225.087	182.957	0.324	0.306	38.101	0.396	0.362	0.413	0.357	0.32	0.344	0.354	0.412	0.173	3.004	-5.281	333
3202	rsuA	b2183	695	1.902	268.544	141.195	0.264	0.379	32.435	0.419	0.42	0.418	0.322	0.442	0.436	0.377	0.417	0.218	4.811	-3.281	2457
3203	yejK	b2186	1007	1.251	205.981	164.663	0.309	0.374	33.34	0.451	0.462	0.44	0.514	0.492	0.459	0.497	0.443	0.233	4.627	-9.881	6164
3222	mqo	b2210	1646	0.989	191.866	194.057	0.33	0.378	32.274	0.436	0.449	0.421	0.322	0.382	0.388	0.341	0.436	0.249	4.161	-5.481	218
3227	ompC	b2215	1103	1.572	13376.5	8508.01	0.183	0.342	1745.35	0.378	0.35	0.402	0.296	0.375	0.357	0.338	0.377	0.302	3.848	-6.581	4278
3234	gyrA	b2231	2627	0.573	416.702	727.124	0.222	0.391	104.393	0.47	0.47	0.469	0.375	0.414	0.466	0.402	0.471	0.273	4.968	-7.181	997
3245	yfaZ	b2250	542	1.838	303.342	164.996	0.342	0.387	24.192	0.437	0.432	0.441	0.353	0.395	0.427	0.374	0.442	0.239	4.012	-5.181	743
3249	menC	b2261	962	0.41	56.929	138.849	0.341	0.441	16.703	0.524	0.534	0.501	0.461	0.483	0.517	0.502	0.525	0.237	4.297	-3.581	0
3250	menB	b2262	857	1.72	312.323	181.635	0.291	0.383	29.53	0.429	0.415	0.441	0.261	0.306	0.349	0.295	0.437	0.293	3.646	-6.081	15
3258	nuoN	b2276	1457	0.357	97.826	273.864	0.267	0.416	32.461	0.485	0.461	0.493	0.347	0.413	0.408	0.392	0.488	0.246	2.294	-4.481	7
3259	nuoM	b2277	1529	0.349	92.377	264.529	0.263	0.396	23.609	0.436	0.443	0.428	0.378	0.445	0.45	0.41	0.435	0.257	1.872	-6.081	164
3260	nuoL	b2278	1841	0.263	88.613	336.505	0.298	0.41	22.501	0.483	0.474	0.478	0.363	0.428	0.436	0.429	0.483	0.269	2.504	-6.181	-3
3261	nuoK	b2279	302	0.363	115.937	319.213	0.247	0.362	19.218	0.45	0.464	0.434	0.352	0.4	0.406	0.375	0.453	0.248	2.658	-9.481	-3
3262	nuoJ	b2280	554	0.251	92.579	369.388	0.291	0.402	27.521	0.477	0.47	0.482	0.357	0.413	0.429	0.419	0.484	0.245	2.767	-9.981	12
3263	nuoI	b2281	542	0.727	214.126	294.436	0.298	0.36	28.611	0.455	0.464	0.436	0.298	0.372	0.43	0.336	0.463	0.264	3.95	-9.081	15
3264	nuoH	b2282	977	0.259	97.859	378.348	0.273	0.407	27.243	0.485	0.46	0.507	0.345	0.351	0.44	0.344	0.49	0.256	2.345	-11.981	-3
3265	nuoG	b2283	2726	0.606	302.517	499.508	0.249	0.417	41.503	0.471	0.474	0.466	0.38	0.455	0.477	0.422	0.471	0.257	4.284	-3.581	53
3266	nuoF	b2284	1337	0.5	227.501	454.586	0.245	0.401	36.85	0.497	0.466	0.53	0.389	0.437	0.419	0.414	0.499	0.265	3.949	-6.181	-3
3267	nuoE	b2285	500	0.831	454.93	547.263	0.256	0.369	48.028	0.437	0.427	0.44	0.282	0.295	0.353	0.305	0.451	0.228	4.439	-3.581	3
3268	nuoC	b2286	1790	0.668	311.336	466.194	0.23	0.38	45.398	0.461	0.444	0.46	0.383	0.436	0.479	0.415	0.462	0.255	4.314	-3.381	106
3269	nuoB	b2287	662	0.9	435.952	484.21	0.245	0.373	77.29	0.439	0.44	0.431	0.32	0.398	0.408	0.393	0.442	0.259	3.728	-6.181	16
3270	nuoA	b2288	443	0.777	212.635	273.712	0.239	0.347	53.223	0.448	0.433	0.457	0.347	0.338	0.349	0.351	0.464	0.248	2.545	-3.581	631
3271	lrhA	b2289	938	0.635	64.28	101.195	0.392	0.344	16.931	0.537	0.496	0.548	0.387	0.393	0.462	0.392	0.546	0.215	3.191	-3.581	2879
3273	yfbT	b2293	650	0.412	51.197	124.311	0.334	0.411	18.396	0.527	0.52	0.532	0.454	0.507	0.472	0.488	0.527	0.185	4.207	-13.381	11
3274	yfbU	b2294	494	1.721	261.594	152.007	0.303	0.316	29.772	0.377	0.379	0.346	0.313	0.339	0.358	0.318	0.38	0.249	3.286	-7.781	83
3276	yfcD	b2299	542	0.994	246.107	247.655	0.27	0.355	45.319	0.438	0.407	0.463	0.282	0.3	0.366	0.305	0.45	0.256	4.565	-6.881	58
3277	yfcE	b2300	554	0.773	161.762	209.142	0.293	0.373	36.142	0.444	0.426	0.458	0.364	0.349	0.356	0.4	0.448	0.222	3.487	-6.181	53
3283	hisJ	b2309	782	2.066	127.651	61.796	0.412	0.334	16.557	0.385	0.401	0.366	0.32	0.443	0.485	0.409	0.379	0.261	4.296	-6.181	221
3286	purF	b2312	1517	0.895	77.93	87.087	0.369	0.359	16.014	0.476	0.498	0.446	0.411	0.382	0.49	0.394	0.478	0.26	3.932	-6.781	37
3287	cvpA	b2313	488	0.166	23.411	140.891	0.303	0.349	26.405	0.5	0.51	0.475	0.558	0.58	0.573	0.558	0.481	0.195	2.09	-3.281	259
3288	dedD	b2314	662	0.401	61.843	154.383	0.329	0.399	26.611	0.499	0.47	0.483	0.275	0.317	0.391	0.325	0.507	0.231	4.474	-7.781	-10
3289	folC	b2315	1268	0.912	145.393	159.45	0.324	0.414	18.879	0.481	0.474	0.48	0.434	0.508	0.452	0.451	0.479	0.226	4.372	-1.681	70
3290	accD	b2316	914	0.881	751.455	853.393	0.22	0.389	142.976	0.462	0.467	0.45	0.357	0.405	0.397	0.386	0.464	0.25	4.124	-4.981	156
3292	truA	b2318	812	0.387	76.669	198.166	0.317	0.407	16.146	0.519	0.473	0.528	0.462	0.435	0.429	0.441	0.523	0.214	3.732	-7.781	0
3293	usg	b2319	1013	1.054	206.73	196.054	0.296	0.401	20.627	0.428	0.426	0.422	0.416	0.471	0.462	0.444	0.419	0.261	4.817	-6.181	66
3294	pdxB	b2320	1136	0.828	189.026	228.3	0.296	0.39	29.884	0.457	0.479	0.435	0.423	0.439	0.513	0.437	0.456	0.218	4.514	-4.981	1091
3296	fabB	b2323	1220	1.284	1318.12	1026.71	0.21	0.388	143.512	0.433	0.447	0.416	0.405	0.381	0.395	0.383	0.433	0.274	3.943	-7.881	2286
3297	yfcL	b2325	278	2.206	361.128	163.699	0.33	0.367	37.731	0.406	0.353	0.444	0.348	0.384	0.377	0.372	0.409	0.225	5.485	-7.481	34
3301	aroC	b2329	1085	0.744	135.394	181.873	0.296	0.395	28.475	0.474	0.469	0.47	0.317	0.382	0.43	0.374	0.479	0.246	4.727	-6.181	35
3302	prmB	b2330	932	1.068	243.671	228.152	0.27	0.369	34.472	0.42	0.424	0.4	0.442	0.352	0.399	0.425	0.415	0.24	4.752	-9.481	788
3310	sixA	b2340	485	0.673	124.681	185.348	0.3	0.381	32.296	0.505	0.51	0.486	0.362	0.457	0.49	0.427	0.512	0.221	3.747	-3.981	203
3313	yfcZ	b2343	284	3.079	626.881	203.593	0.272	0.327	47.519	0.417	0.411	0.422	0.351	0.33	0.426	0.362	0.416	0.239	4.412	-5.181	3318
3338	gltX	b2400	1415	1.322	1026.97	776.851	0.217	0.367	121.701	0.396	0.391	0.4	0.349	0.394	0.371	0.372	0.395	0.253	4.551	-5.481	921
3343	ypeB	b4546	218	0.21	26.331	125.508	0.357	0.403	20.658	0.491	0.438	0.526	0.397	0.371	0.422	0.396	0.532	0.278	3.247	-3.381	2
3344	ligA	b2411	2015	1.072	187.734	175.066	0.308	0.394	24.656	0.447	0.458	0.431	0.364	0.381	0.426	0.379	0.448	0.229	4.903	-4.081	71
3345	zipA	b2412	986	0.302	120.638	399.256	0.239	0.384	62.956	0.46	0.481	0.434	0.359	0.497	0.495	0.445	0.457	0.209	4.082	-2.881	5153
3351	cysP	b2425	1016	3.583	3.715	1.037	0.398	0.357	47.021	0.394	0.397	0.389	0.351	0.424	0.379	0.397	0.391	0.277	4.299	-5.881	304
3352	ucpA	b2426	791	0.747	78.868	105.563	0.381	0.391	17.817	0.473	0.479	0.456	0.345	0.393	0.421	0.369	0.476	0.245	4.508	-8.681	129
3354	yfeX	b2431	899	1.144	292.995	256.183	0.246	0.379	35.573	0.443	0.446	0.435	0.357	0.378	0.453	0.378	0.446	0.253	4.99	-11.081	96
3383	purC	b2476	713	2.174	169.073	77.753	0.357	0.337	25.601	0.399	0.4	0.394	0.35	0.332	0.35	0.348	0.402	0.296	5.289	-7.781	213
3384	bamC	b2477	1034	0.517	253.608	490.095	0.235	0.409	82.897	0.463	0.473	0.451	0.424	0.447	0.477	0.404	0.459	0.241	4.265	-9.681	17
3385	dapA	b2478	878	0.805	430.592	535.156	0.217	0.362	94.041	0.445	0.434	0.452	0.412	0.388	0.381	0.399	0.446	0.232	3.964	-6.181	15060
3388	uraA	b2497	1289	0.636	72.422	113.794	0.33	0.374	23.852	0.427	0.431	0.421	0.383	0.383	0.415	0.392	0.428	0.233	2.426	-6.181	86
3389	upp	b2498	626	1.901	1452.78	764.181	0.21	0.378	186.673	0.396	0.377	0.406	0.323	0.275	0.306	0.323	0.408	0.278	5.113	-8.681	5823
3391	guaA	b2507	1577	1.197	1542.87	1288.51	0.204	0.388	184.774	0.421	0.409	0.429	0.344	0.352	0.379	0.373	0.423	0.272	4.727	-3.581	69
3392	guaB	b2508	1466	2.289	2541.45	1110.09	0.206	0.378	161.873	0.402	0.4	0.393	0.407	0.403	0.401	0.403	0.401	0.276	4.571	-2.881	1529
3393	yfgJ	b2510	215	0.8	94.618	118.294	0.28	0.327	24.977	0.379	0.339	0.413	0.305	0.293	0.346	0.336	0.406	0.176	2.396	-9.481	70
3394	der	b2511	1472	1.056	323.527	306.504	0.27	0.358	47.255	0.428	0.441	0.413	0.379	0.416	0.412	0.385	0.428	0.261	4.946	-5.581	118
3395	bamB	b2512	1178	0.632	272.672	431.542	0.251	0.403	58.101	0.45	0.438	0.457	0.437	0.403	0.413	0.412	0.452	0.234	4.011	-7.181	11
3396	yfgM	b2513	620	0.726	265.478	365.696	0.272	0.363	57.585	0.451	0.434	0.466	0.334	0.363	0.374	0.353	0.459	0.244	4.51	-8.681	18
3397	hisS	b2514	1274	0.886	370.15	417.893	0.25	0.39	58.399	0.426	0.423	0.427	0.282	0.373	0.375	0.345	0.428	0.254	4.204	-2.881	111
3398	ispG	b2515	1118	0.634	198.275	312.939	0.267	0.382	47.283	0.472	0.475	0.461	0.417	0.433	0.484	0.442	0.474	0.255	4.267	-6.181	27
3400	rlmN	b2517	1154	0.797	275.146	345.308	0.262	0.386	69.394	0.446	0.451	0.436	0.325	0.338	0.366	0.349	0.454	0.267	3.873	-6.781	150
3401	ndk	b2518	431	2.336	3186.94	1364.01	0.191	0.332	297.775	0.356	0.313	0.382	0.334	0.305	0.323	0.319	0.364	0.262	4.852	-7.881	149
3404	sseB	b2522	776	0.729	87.887	120.597	0.316	0.332	20.106	0.452	0.468	0.434	0.306	0.393	0.458	0.376	0.457	0.23	4.892	-3.681	142
3405	pepB	b2523	1283	1.244	268.578	215.976	0.301	0.407	20.996	0.433	0.416	0.449	0.355	0.377	0.36	0.392	0.433	0.246	4.394	-6.081	178
3406	iscX	b2524	200	0.708	361.943	511.028	0.214	0.292	66.249	0.425	0.461	0.38	0.318	0.433	0.461	0.389	0.42	0.206	6.614	-7.881	12
3407	fdx	b2525	335	1.311	639.221	487.415	0.205	0.311	67.536	0.391	0.4	0.381	0.425	0.413	0.393	0.432	0.385	0.22	5.105	-7.881	2
3408	hscA	b2526	1850	0.551	236.385	429.002	0.251	0.436	40.943	0.499	0.501	0.497	0.335	0.476	0.506	0.426	0.499	0.24	4.981	-3.581	17
3409	hscB	b2527	515	0.416	161.313	388.228	0.242	0.363	42.911	0.454	0.487	0.418	0.415	0.393	0.423	0.394	0.46	0.225	5.541	-2.881	96
3410	iscA	b2528	323	0.443	540.299	1218.77	0.21	0.315	162.253	0.537	0.568	0.501	0.472	0.482	0.526	0.481	0.544	0.251	5.458	-7.881	17
3411	iscU	b2529	386	1.811	1407.5	777.374	0.201	0.341	169.55	0.426	0.41	0.438	0.382	0.397	0.388	0.407	0.43	0.266	4.803	-7.781	28
3412	iscS	b2530	1214	1.185	1235.72	1042.58	0.191	0.36	156.638	0.419	0.417	0.418	0.339	0.389	0.427	0.377	0.418	0.284	4.106	-6.181	112
3413	iscR	b2531	488	1.825	677.591	371.374	0.232	0.357	94.061	0.438	0.413	0.459	0.336	0.37	0.373	0.351	0.447	0.243	4.457	-7.881	452
3414	trmJ	b2532	740	1.219	353.492	289.986	0.277	0.406	58.085	0.444	0.459	0.426	0.356	0.358	0.429	0.389	0.441	0.24	4.161	-0.281	3384
3423	glyA	b2551	1253	1.68	2407.72	1432.98	0.19	0.361	185.464	0.38	0.367	0.393	0.309	0.313	0.314	0.324	0.381	0.27	4.633	-7.781	1563
3424	glnB	b2553	338	1.524	473.993	311.059	0.263	0.362	58.935	0.415	0.417	0.41	0.32	0.307	0.39	0.346	0.438	0.272	5.747	-3.281	61
3429	tadA	b2559	503	0.553	68.903	124.608	0.376	0.389	20.371	0.505	0.509	0.483	0.455	0.462	0.508	0.493	0.497	0.228	4.079	-6.181	58
3432	pdxJ	b2564	731	1.174	152.96	130.238	0.334	0.4	23.187	0.42	0.423	0.417	0.292	0.359	0.369	0.351	0.425	0.26	5.021	-6.881	12
3434	era	b2566	905	0.687	254.093	369.84	0.252	0.354	68.162	0.443	0.459	0.422	0.403	0.53	0.452	0.475	0.436	0.266	4.37	-6.181	-3
3435	rnc	b2567	680	1.06	348.363	328.774	0.261	0.354	67.862	0.422	0.393	0.445	0.38	0.325	0.329	0.337	0.431	0.237	4.19	-3.381	272
3436	lepB	b2568	974	0.243	76.244	313.752	0.269	0.39	51.805	0.458	0.461	0.453	0.39	0.463	0.499	0.392	0.456	0.238	4.188	-7.781	16
3437	lepA	b2569	1799	1.14	528.387	463.409	0.245	0.374	63.903	0.42	0.414	0.425	0.244	0.341	0.38	0.301	0.422	0.271	4.363	-3.281	198
3439	rseB	b2571	956	0.432	65.996	152.664	0.312	0.351	19.898	0.478	0.5	0.455	0.372	0.539	0.624	0.477	0.46	0.205	3.163	-5.181	0
3440	rseA	b2572	650	0.669	151.185	226.099	0.28	0.348	44.189	0.437	0.438	0.433	0.352	0.397	0.405	0.362	0.434	0.235	4.187	-6.381	33
3441	rpoE	b2573	575	0.306	64.379	210.342	0.312	0.383	36.931	0.506	0.515	0.482	0.444	0.455	0.48	0.451	0.512	0.205	3.852	-9.281	2015
3444	yfiD	b2579	383	2.788	1106.76	396.905	0.225	0.336	50.732	0.347	0.299	0.381	0.333	0.3	0.32	0.334	0.355	0.277	5.54	-9.481	1042
3445	yfiF	b2581	1037	1.284	373.063	290.502	0.287	0.406	59.336	0.465	0.478	0.448	0.345	0.348	0.454	0.391	0.462	0.259	4.893	-6.181	5920
3446	kgtP	b2587	1298	0.735	375.235	510.316	0.267	0.338	110.674	0.411	0.388	0.43	0.264	0.326	0.35	0.316	0.411	0.209	1.756	-7.781	5854
3447	clpB	b2592	2573	1.052	298.802	283.976	0.313	0.363	32.047	0.439	0.439	0.433	0.73	0.365	0.376	0.747	0.441	0.258	4.728	-9.181	130
3448	yfiH	b2593	731	0.459	50.26	109.578	0.369	0.404	19.929	0.493	0.518	0.449	0.499	0.545	0.502	0.511	0.486	0.191	3.298	-5.781	-3
3449	rluD	b2594	980	1.473	236.272	160.366	0.322	0.378	32.806	0.432	0.43	0.43	0.304	0.391	0.436	0.353	0.434	0.228	4.563	-1.881	2937
3452	rplS	b2606	347	1.841	14887.6	8087.28	0.227	0.32	1637.54	0.434	0.395	0.466	0.251	0.322	0.348	0.321	0.463	0.266	3.282	-3.581	42
3453	trmD	b2607	767	0.017	139.544	8374.16	0.216	0.396	1449.11	0.615	0.619	0.608	0.51	0.535	0.52	0.519	0.62	0.234	3.95	-2.381	31
3454	rimM	b2608	548	0.054	523.464	9709.67	0.205	0.377	1484.87	0.579	0.598	0.557	0.598	0.594	0.6	0.583	0.571	0.243	4.877	-6.981	19
3455	rpsP	b2609	248	1.454	13743.6	9449.68	0.168	0.346	1802.81	0.428	0.402	0.437	0.317	0.375	0.383	0.347	0.44	0.265	3.583	-6.181	249
3456	ffh	b2610	1361	0.856	335.795	392.26	0.252	0.38	60.608	0.449	0.449	0.448	0.396	0.456	0.468	0.432	0.448	0.28	4.645	-4.581	2320
3457	grpE	b2614	593	2.481	2575.92	1038.16	0.22	0.329	217.525	0.396	0.384	0.409	0.321	0.271	0.319	0.291	0.41	0.272	5.727	-6.181	3300
3458	yfjF	b2618	290	0.757	111.573	147.392	0.308	0.365	30.12	0.49	0.557	0.416	0.467	0.566	0.569	0.509	0.466	0.187	4.541	-7.881	-10
3459	yfjG	b2619	476	1.226	230.73	188.176	0.346	0.332	41.547	0.408	0.399	0.411	0.748	0.474	0.392	0.615	0.399	0.197	3.086	-4.281	2880
3472	stpA	b2669	404	2.321	1559.57	671.986	0.256	0.321	170.39	0.371	0.365	0.375	0.34	0.384	0.343	0.376	0.36	0.269	5.198	-4.181	1155
3474	luxS	b2687	515	1.652	909.187	550.243	0.224	0.347	113.161	0.385	0.371	0.398	0.285	0.357	0.327	0.327	0.387	0.256	4.319	-11.181	150
3475	gshA	b2688	1556	0.561	132.233	235.622	0.285	0.352	41.46	0.438	0.431	0.442	0.453	0.478	0.496	0.469	0.436	0.242	3.925	-11.181	73
3476	yqaA	b2689	428	0.019	3.5	180.718	0.323	0.369	22.172	0.569	0.559	0.563	0.488	0.482	0.539	0.471	0.563	0.197	1.31	-4.681	-3
3477	yqaB	b2690	566	0.894	105.453	117.964	0.326	0.381	19.988	0.48	0.465	0.488	0.339	0.435	0.482	0.45	0.486	0.216	4.388	-2.881	1458
3478	csrA	b2696	185	1.908	1912.77	1002.59	0.2	0.3	217.624	0.331	0.329	0.327	0.289	0.345	0.332	0.343	0.322	0.224	3.821	-8.681	235
3479	alaS	b2697	2630	0.932	730.452	783.989	0.224	0.385	104.419	0.449	0.428	0.459	0.309	0.308	0.395	0.299	0.451	0.259	4.793	-3.281	128
3481	recA	b2699	1061	1.582	721.37	456.117	0.212	0.378	93.797	0.402	0.424	0.38	0.366	0.322	0.335	0.365	0.403	0.297	4.607	-7.781	80
3499	rpoS	b2741	992	0.493	199.043	403.509	0.271	0.369	53.466	0.495	0.481	0.508	0.302	0.313	0.334	0.322	0.506	0.247	5.195	-7.781	63
3500	nlpD	b2742	1139	0.544	148.688	273.29	0.422	0.338	32.493	0.575	0.422	0.536	0.49	0.501	0.457	0.48	0.575	0.218	3.176	-8.581	140
3501	pcm	b2743	626	0.334	52.139	156.178	0.369	0.383	15.882	0.512	0.489	0.531	0.416	0.336	0.494	0.39	0.53	0.214	3.708	-6.181	-6
3502	surE	b2744	761	0.27	48.819	180.508	0.303	0.393	19.762	0.534	0.567	0.5	0.383	0.527	0.572	0.448	0.53	0.205	4.447	-4.981	-19
3503	truD	b2745	1049	0.453	104.482	230.857	0.292	0.382	30.016	0.468	0.48	0.455	0.397	0.523	0.498	0.453	0.463	0.233	4.644	-5.481	-3
3504	ispF	b2746	479	0.532	142.326	267.339	0.308	0.386	27.756	0.415	0.438	0.39	0.34	0.312	0.415	0.343	0.427	0.211	5.111	-7.781	0
3505	ispD	b2747	710	0.273	53.049	194.434	0.3	0.386	24.013	0.492	0.486	0.495	0.406	0.51	0.41	0.456	0.489	0.188	3.945	-3.581	19
3506	ftsB	b2748	311	0.16	50.77	316.397	0.285	0.357	41.712	0.493	0.481	0.491	0.503	0.545	0.518	0.538	0.477	0.196	3.865	-10.181	194
3521	cysJ	b2764	1799	0.755	4.537	6.008	0.443	0.393	35.734	0.465	0.446	0.458	0.36	0.469	0.428	0.438	0.464	0.245	4.413	-3.581	3021
3528	eno	b2779	1298	1.897	4054.85	2137.83	0.184	0.341	538.349	0.367	0.348	0.385	0.328	0.341	0.32	0.35	0.368	0.296	4.422	-7.481	88
3529	pyrG	b2780	1637	1.307	1021.52	781.386	0.201	0.366	164.399	0.419	0.412	0.42	0.354	0.348	0.342	0.342	0.421	0.256	4.231	-4.981	228
3538	yqcA	b2790	449	0.759	80.501	106.053	0.36	0.357	16.86	0.453	0.456	0.443	0.363	0.394	0.436	0.401	0.458	0.236	4.7	-8.381	18
3540	yqcC	b2792	329	2.047	125.328	61.214	0.386	0.333	15.336	0.383	0.372	0.392	0.476	0.435	0.399	0.45	0.366	0.182	5.233	-7.881	622
3545	ygdD	b2807	395	1.044	148.432	142.237	0.341	0.388	23.015	0.431	0.453	0.402	0.452	0.503	0.458	0.462	0.416	0.216	2.352	-5.181	19
3549	mltA	b2813	1097	0.626	70.691	112.84	0.349	0.378	25.321	0.43	0.45	0.409	0.383	0.428	0.39	0.427	0.428	0.245	3.855	-2.581	579
3550	amiC	b2817	1253	0.522	51.026	97.807	0.372	0.379	16.758	0.466	0.467	0.453	0.374	0.388	0.426	0.387	0.47	0.249	4.242	-4.581	1625
3559	thyA	b2827	794	0.888	163.148	183.663	0.292	0.329	38.42	0.415	0.412	0.405	0.311	0.326	0.334	0.349	0.42	0.255	4.044	-6.181	7
3560	lgt	b2828	875	0.629	91.363	145.232	0.33	0.354	22.971	0.425	0.439	0.409	0.411	0.432	0.409	0.375	0.423	0.234	2.292	-3.681	151
3561	ptsP	b2829	2246	0.4	49.959	124.766	0.382	0.398	16.877	0.49	0.496	0.475	0.445	0.525	0.506	0.479	0.484	0.224	3.971	-7.881	13
3562	rppH	b2830	530	0.394	88.098	223.639	0.331	0.325	37.925	0.44	0.488	0.389	0.529	0.558	0.551	0.556	0.426	0.205	3.067	-7.881	353
3586	lysS	b2890	1517	1.227	1236.87	1008.01	0.196	0.353	136.641	0.397	0.392	0.401	0.356	0.302	0.389	0.311	0.4	0.287	5.031	-7.481	1031
3588	prfB	b2891	1022	1.077	882.427	819.067	0.213	0.368	123.505	0.341	0.341	0.445	0.319	0.341	0.341	0.319	0.44	0.278	5.562	-0.881	167
3589	recJ	b2892	1733	0.36	48.736	135.202	0.331	0.413	15.143	0.502	0.508	0.491	0.399	0.437	0.561	0.46	0.499	0.23	4.127	-3.081	6
3590	dsbC	b2893	710	1.493	206.061	138.063	0.31	0.338	24.954	0.391	0.377	0.404	0.316	0.416	0.435	0.384	0.387	0.236	4.358	-3.581	25
3592	ygfX	b2896	407	0.11	15.122	137.855	0.324	0.41	19.343	0.509	0.541	0.476	0.429	0.565	0.561	0.486	0.497	0.222	1.7	-3.681	-19
3593	ygfY	b2897	266	1.579	254.181	161.027	0.336	0.286	42.442	0.351	0.35	0.349	0.345	0.384	0.358	0.379	0.337	0.249	4.256	-4.781	1419
3595	yqfB	b2900	311	2.486	206.738	83.146	0.387	0.247	18.407	0.32	0.333	0.309	0.323	0.317	0.332	0.328	0.319	0.249	5.069	-5.181	1535
3598	gcvH	b2904	389	2.372	391.532	165.035	0.295	0.33	31.767	0.364	0.342	0.383	0.277	0.263	0.328	0.276	0.382	0.272	6.863	-6.181	24
3602	pepP	b2908	1325	0.585	127.587	217.926	0.269	0.378	28.659	0.455	0.437	0.463	0.347	0.418	0.43	0.37	0.456	0.256	4.816	-11.181	26
3603	ygfB	b2909	578	1.028	301.915	293.692	0.258	0.328	45.456	0.415	0.422	0.4	0.381	0.316	0.371	0.375	0.422	0.238	4.726	-0.981	1734
3604	serA	b2913	1232	1.897	726.487	382.965	0.258	0.361	62.521	0.412	0.412	0.409	0.179	0.264	0.333	0.234	0.418	0.251	4.12	-6.981	256
3605	rpiA	b2914	659	1.311	588.219	448.673	0.236	0.346	97.358	0.385	0.367	0.403	0.371	0.279	0.344	0.368	0.391	0.258	4.262	-3.281	53
3608	yggE	b2922	740	1.619	225.174	139.047	0.336	0.349	25.306	0.386	0.379	0.384	0.282	0.338	0.333	0.292	0.388	0.231	4.708	-6.181	93
3610	mscS	b2924	860	0.611	224.434	367.197	0.258	0.359	64.373	0.417	0.413	0.418	0.268	0.333	0.399	0.32	0.421	0.244	3.189	-6.081	358
3611	fbaA	b2925	1079	1.48	1843.31	1245.14	0.188	0.34	232.317	0.367	0.36	0.372	0.246	0.261	0.268	0.253	0.372	0.28	4.325	-5.181	215
3612	pgk	b2926	1163	2.136	1978.32	926.029	0.208	0.339	147.845	0.397	0.382	0.407	0.325	0.363	0.346	0.357	0.397	0.282	4.688	-6.181	50
3613	epd	b2927	1019	0.303	67.851	223.961	0.391	0.377	33.974	0.554	0.498	0.588	0.445	0.519	0.563	0.463	0.554	0.209	3.87	-6.281	285
3620	tktA	b2935	1991	1.577	1132.27	718.022	0.219	0.386	87.845	0.43	0.418	0.441	0.362	0.365	0.397	0.367	0.431	0.273	4.28	-6.181	1242
3621	speB	b2937	920	1.811	895.144	494.401	0.239	0.377	84.177	0.387	0.381	0.391	0.286	0.28	0.34	0.29	0.394	0.251	4.724	-7.781	138
3622	speA	b2938	1976	0.977	749.257	767.036	0.221	0.4	99.72	0.44	0.456	0.424	0.502	0.552	0.483	0.5	0.436	0.26	4.171	-7.881	9
3629	yggL	b2959	326	1.2	611.09	509.107	0.239	0.317	98.425	0.406	0.361	0.444	0.308	0.357	0.325	0.341	0.413	0.258	5.334	-6.581	0
3630	trmI	b2960	719	1.022	296.566	290.105	0.269	0.388	58.983	0.443	0.436	0.441	0.369	0.421	0.435	0.408	0.443	0.236	4.934	-2.281	4168
3635	yghG	b2971	410	1.611	109.463	67.964	0.354	0.285	15.818	0.416	0.409	0.412	0.389	0.356	0.424	0.368	0.413	0.205	2.033	-2.881	66
3637	yghJ	b4466	4562	0.612	132.963	217.27	0.292	0.369	31.772	0.428	0.417	0.44	0.281	0.275	0.355	0.298	0.43	0.24	4.357	-0.081	485
3661	yqhA	b3002	494	0.936	120.142	128.295	0.277	0.319	35.996	0.42	0.401	0.429	0.396	0.404	0.387	0.428	0.421	0.24	2.284	-3.281	1347
3662	exbD	b3005	425	0.356	93.176	261.513	0.278	0.329	51.474	0.453	0.459	0.442	0.426	0.326	0.384	0.394	0.474	0.247	4.99	-5.181	7
3663	exbB	b3006	734	0.873	173.607	198.759	0.264	0.388	47.61	0.453	0.441	0.464	0.468	0.474	0.48	0.467	0.451	0.25	3.665	-6.181	2278
3665	ygiQ	b4469	2219	1.023	110.734	108.238	0.368	0.38	16.885	0.461	0.468	0.445	0.341	0.41	0.423	0.352	0.462	0.245	3.742	-3.581	111
3666	ftsP	b3017	1412	0.708	99.13	140.053	0.356	0.399	15.832	0.476	0.457	0.472	0.327	0.416	0.427	0.401	0.478	0.228	3.425	-6.181	75
3667	plsC	b3018	737	0.62	63.256	102.062	0.338	0.333	18.692	0.413	0.381	0.439	0.236	0.249	0.294	0.254	0.422	0.229	2.344	-6.181	234
3668	parC	b3019	2258	0.625	133.776	214.148	0.295	0.395	29.999	0.468	0.466	0.469	0.395	0.412	0.412	0.399	0.469	0.259	4.593	-7.481	138
3675	parE	b3030	1892	0.986	204.951	207.943	0.301	0.384	28.663	0.461	0.471	0.449	0.37	0.451	0.498	0.417	0.461	0.244	4.665	1.319	29
3677	cpdA	b3032	827	0.249	50.57	203.439	0.286	0.405	23.564	0.499	0.495	0.475	0.44	0.438	0.466	0.405	0.501	0.207	4.514	-7.381	25
3678	yqiB	b3033	422	0.252	29.586	117.306	0.424	0.311	20.118	0.518	0.432	0.467	0.381	0.416	0.497	0.361	0.521	0.191	2.941	-7.181	1
3681	ribB	b3041	653	1.391	331.381	238.218	0.305	0.355	36.769	0.399	0.408	0.371	0.336	0.38	0.425	0.402	0.4	0.25	4.739	-8.981	7273
3683	rfaE	b3052	1433	0.896	208.042	232.184	0.319	0.391	28.18	0.455	0.455	0.453	0.387	0.307	0.428	0.376	0.453	0.263	4.536	-7.781	48
3686	bacA	b3057	821	0.621	81.203	130.808	0.327	0.389	19.982	0.439	0.416	0.45	0.385	0.375	0.417	0.366	0.441	0.236	2.69	-7.781	90
3719	yhbS	b3156	503	0.612	104.424	170.677	0.322	0.408	22.78	0.485	0.481	0.436	0.372	0.491	0.48	0.435	0.483	0.223	5.746	-7.381	-6
3720	yhbT	b3157	524	0.591	98.21	166.182	0.318	0.351	29.257	0.43	0.433	0.424	0.382	0.407	0.422	0.379	0.431	0.243	4.509	-8.381	3297
3722	deaD	b3162	1889	0.988	777.626	787.059	0.223	0.402	118.633	0.442	0.424	0.46	0.376	0.456	0.425	0.412	0.441	0.285	4.822	-5.581	180
3723	nlpI	b3163	884	0.066	54.658	826.098	0.273	0.377	117.52	0.527	0.532	0.516	0.53	0.492	0.489	0.533	0.523	0.205	3.898	-6.181	109
3724	pnp	b3164	2135	1.214	1303.08	1073.53	0.208	0.375	156.646	0.429	0.424	0.433	0.289	0.391	0.388	0.331	0.43	0.28	4.829	-6.081	247
3725	rpsO	b3165	269	1.514	12388.4	8183.97	0.171	0.312	1795.02	0.374	0.356	0.382	0.26	0.283	0.35	0.285	0.386	0.292	3.344	-6.181	149
3726	truB	b3166	944	0.368	132.158	358.984	0.223	0.383	57.401	0.498	0.491	0.503	0.525	0.603	0.585	0.553	0.491	0.248	4.358	-11.981	0
3727	rbfA	b3167	401	1.552	795.956	512.9	0.232	0.347	75.154	0.437	0.412	0.46	0.381	0.374	0.386	0.363	0.448	0.3	5.558	-7.781	164
3728	infB	b3168	2672	1.023	1500.22	1467.2	0.194	0.372	176.729	0.449	0.449	0.448	0.313	0.457	0.477	0.392	0.449	0.282	5.506	-7.281	25
3729	nusA	b3169	1487	0.97	1050.05	1082.28	0.207	0.366	152.003	0.449	0.427	0.47	0.364	0.376	0.4	0.389	0.452	0.278	5.746	-5.881	28
3732	secG	b3175	332	0.38	1081.07	2847.2	0.218	0.323	351.189	0.444	0.438	0.445	0.34	0.357	0.415	0.368	0.455	0.243	3.43	-7.881	228
3733	glmM	b3176	1337	1.167	479.072	410.384	0.23	0.388	59.096	0.412	0.414	0.408	0.281	0.352	0.38	0.327	0.414	0.254	4.534	-6.081	-7
3737	greA	b3181	476	1.21	502.233	414.955	0.251	0.329	106.036	0.351	0.35	0.35	0.267	0.313	0.35	0.281	0.355	0.283	5.635	-7.881	1867
3738	obgE	b3183	1172	0.906	400.348	441.768	0.256	0.377	58.829	0.446	0.467	0.425	0.339	0.37	0.444	0.363	0.447	0.262	5.715	-6.181	16
3739	yhbE	b3184	965	0.052	18.792	360.417	0.288	0.412	49.489	0.572	0.563	0.544	0.476	0.465	0.484	0.505	0.577	0.209	2.195	-7.181	127
3740	rpmA	b3185	257	1.386	14347.3	10351.9	0.216	0.328	2199.56	0.409	0.404	0.41	0.309	0.357	0.377	0.344	0.425	0.285	4.625	-10.081	21
3741	rplU	b3186	311	1.26	15964.7	12665.5	0.193	0.341	2542.2	0.411	0.38	0.442	0.394	0.373	0.361	0.393	0.422	0.245	4.46	-9.181	1784
3742	murA	b3189	1259	0.816	336.474	412.537	0.237	0.378	68.524	0.444	0.441	0.447	0.333	0.403	0.424	0.347	0.446	0.255	4.6	-2.281	55
3743	yrbA	b3190	254	2.126	558.286	262.606	0.248	0.336	56.298	0.414	0.434	0.391	0.405	0.411	0.429	0.405	0.41	0.232	4.354	-0.281	160
3750	elbB	b3209	653	1.352	206.897	153.012	0.353	0.379	21.924	0.461	0.413	0.502	0.318	0.323	0.358	0.315	0.469	0.216	4.958	-6.081	230
3760	sspB	b3228	497	0.253	243.662	964.583	0.209	0.391	132.992	0.505	0.533	0.476	0.416	0.395	0.487	0.433	0.515	0.221	4.818	-6.181	6
3761	sspA	b3229	638	0.956	880.022	920.896	0.194	0.371	167.404	0.428	0.417	0.438	0.39	0.464	0.454	0.419	0.424	0.259	4.128	-11.181	395
3762	rpsI	b3230	392	1.224	19319.9	15783.3	0.171	0.333	2675.33	0.438	0.451	0.421	0.315	0.4	0.409	0.372	0.443	0.315	3.202	-3.581	16
3763	rplM	b3231	428	1.283	16227.6	12648.5	0.188	0.324	2872.7	0.43	0.436	0.422	0.331	0.366	0.419	0.349	0.439	0.267	4.468	-3.281	219
3765	mdh	b3236	938	1.332	702.469	527.374	0.221	0.367	97.626	0.413	0.412	0.412	0.361	0.434	0.383	0.373	0.411	0.258	4.534	-9.981	1589
3770	tldD	b3244	1445	0.99	151.165	152.701	0.311	0.403	22.616	0.466	0.484	0.442	0.335	0.428	0.496	0.379	0.467	0.252	5.101	-3.481	430
3772	rng	b3247	1469	0.433	55.81	128.992	0.383	0.389	17.888	0.503	0.523	0.467	0.354	0.358	0.332	0.369	0.507	0.237	4.753	-4.281	-10
3773	yhdE	b3248	593	0.49	86.148	175.715	0.329	0.385	20.197	0.483	0.486	0.472	0.426	0.505	0.506	0.451	0.48	0.226	4.551	-4.981	9
3774	mreD	b3249	488	0.176	28.991	164.764	0.3	0.396	17.448	0.488	0.487	0.488	0.52	0.5	0.533	0.513	0.48	0.229	1.101	-9.481	0
3775	mreC	b3250	1103	0.213	63.96	300.897	0.271	0.406	35.063	0.499	0.502	0.478	0.359	0.438	0.545	0.406	0.494	0.228	3.674	-2.881	66
3776	mreB	b3251	1043	1.423	885.615	622.434	0.225	0.382	123.622	0.413	0.423	0.401	0.369	0.402	0.369	0.379	0.413	0.27	4.369	-5.181	305
3779	yrdB	b3280	257	0.319	57.359	179.886	0.377	0.361	23.841	0.464	0.504	0.387	0.483	0.395	0.467	0.422	0.474	0.216	5.186	-11.081	-3
3780	aroE	b3281	818	0.472	87.476	185.276	0.34	0.348	25.967	0.414	0.409	0.417	0.383	0.348	0.346	0.363	0.418	0.195	3.349	-7.781	5
3781	rimN	b3282	572	1.044	249.028	238.614	0.317	0.36	32.412	0.445	0.447	0.433	0.499	0.507	0.499	0.49	0.433	0.173	3.523	-4.981	5
3782	yrdD	b3283	542	0.247	44.745	181.058	0.346	0.347	25.702	0.509	0.515	0.502	0.498	0.474	0.453	0.521	0.502	0.193	2.827	-0.081	29
3783	smg	b3284	473	0.122	25.439	208.585	0.305	0.31	33.011	0.434	0.424	0.438	0.488	0.427	0.403	0.478	0.433	0.207	4.651	-13.381	-28
3788	rplQ	b3294	383	0.858	15536.4	18104	0.167	0.383	2694.96	0.492	0.439	0.544	0.3	0.405	0.406	0.378	0.509	0.259	3.496	-7.881	41
3789	rpoA	b3295	989	0.201	3797	18894	0.203	0.374	2688.9	0.528	0.529	0.526	0.408	0.479	0.493	0.408	0.53	0.237	4.502	-8.181	26
3790	rpsD	b3296	620	0.649	12156.3	18735.1	0.201	0.359	3006.34	0.467	0.451	0.482	0.331	0.467	0.473	0.413	0.464	0.268	3.96	-6.181	34
3791	rpsK	b3297	389	0.46	8020.37	17442	0.207	0.336	2665.05	0.485	0.458	0.507	0.361	0.426	0.432	0.398	0.489	0.25	2.711	-6.981	17
3792	rpsM	b3298	356	0.662	11578.8	17498.2	0.191	0.36	2818.98	0.527	0.487	0.566	0.398	0.457	0.488	0.432	0.541	0.258	3.804	-7.781	147
3794	secY	b3300	1331	0.038	506.527	13332.2	0.235	0.386	1597.24	0.564	0.598	0.521	0.439	0.523	0.564	0.479	0.564	0.227	2.581	-5.181	8
3795	rplO	b3301	434	0.598	9738.24	16276.2	0.167	0.363	2103.69	0.509	0.545	0.47	0.452	0.495	0.554	0.466	0.511	0.293	3.696	-10.081	4
3796	rpmD	b3302	179	0.785	12982.9	16531.5	0.206	0.324	2251.22	0.484	0.46	0.499	0.339	0.451	0.455	0.436	0.498	0.248	3.668	-6.681	4
3797	rpsE	b3303	503	0.656	9323.73	14213.4	0.207	0.352	1972.98	0.465	0.468	0.46	0.408	0.452	0.445	0.462	0.466	0.276	4.236	-7.881	15
3798	rplR	b3304	353	0.823	10703.5	13000.8	0.184	0.353	1959.02	0.481	0.496	0.455	0.407	0.41	0.439	0.412	0.485	0.271	4.391	-4.981	10
3799	rplF	b3305	533	0.769	13355.9	17368.8	0.195	0.365	1872.53	0.484	0.475	0.492	0.508	0.58	0.493	0.518	0.47	0.249	4.079	-9.481	13
3800	rpsH	b3306	392	0.741	9383.05	12667.6	0.223	0.348	1943.79	0.486	0.467	0.505	0.402	0.476	0.468	0.434	0.485	0.272	4.676	-6.181	34
3801	rpsN	b3307	305	0.724	10324.9	14261.3	0.189	0.361	2106.14	0.488	0.441	0.53	0.354	0.387	0.367	0.357	0.513	0.264	3.819	-9.481	15
3802	rplE	b3308	539	0.47	7678.56	16329.8	0.203	0.337	2540.3	0.449	0.401	0.496	0.313	0.3	0.387	0.337	0.466	0.292	3.509	-6.181	15
3803	rplX	b3309	314	0.516	8456.15	16377.8	0.175	0.324	3379.88	0.498	0.485	0.502	0.486	0.444	0.466	0.445	0.496	0.281	4.589	-9.981	11
3804	rplN	b3310	371	0.455	7948.86	17482.6	0.21	0.369	3055.57	0.515	0.534	0.488	0.429	0.52	0.55	0.459	0.511	0.272	3.334	-6.181	165
3805	rpsQ	b3311	254	0.839	14251.7	16982	0.193	0.342	2369.66	0.47	0.453	0.48	0.394	0.479	0.485	0.464	0.467	0.276	4.367	-8.981	0
3806	rpmC	b3312	191	0.486	8793.6	18093.9	0.176	0.339	2537.33	0.452	0.469	0.423	0.336	0.404	0.456	0.386	0.456	0.285	4.182	-6.081	0
3807	rplP	b3313	410	0.762	11511	15108.7	0.173	0.355	2058.18	0.432	0.425	0.429	0.336	0.338	0.392	0.364	0.451	0.298	3.706	-11.181	13
3808	rpsC	b3314	701	0.713	11275.7	15815.5	0.187	0.371	2055.67	0.481	0.456	0.496	0.288	0.35	0.425	0.313	0.491	0.292	4.002	-6.181	18
3809	rplV	b3315	332	0.617	10412	16879.1	0.177	0.315	2106.43	0.468	0.449	0.481	0.4	0.405	0.449	0.392	0.478	0.253	4.568	-11.081	15
3810	rpsS	b3316	278	0.778	12241.8	15729.4	0.19	0.311	2000.76	0.441	0.467	0.415	0.421	0.417	0.445	0.403	0.444	0.245	4.201	-6.181	17
3811	rplB	b3317	821	0.854	11836.7	13862.3	0.187	0.378	1730.11	0.479	0.446	0.512	0.325	0.404	0.393	0.377	0.484	0.273	3.869	-9.481	18
3812	rplW	b3318	302	0.585	8915.95	15244.2	0.188	0.308	2120.82	0.444	0.451	0.434	0.449	0.508	0.469	0.461	0.428	0.309	4.721	-10.081	-3
3813	rplD	b3319	605	0.656	10921.1	16656.3	0.16	0.348	2068.25	0.464	0.466	0.462	0.405	0.497	0.482	0.458	0.461	0.269	4.548	-9.981	11
3814	rplC	b3320	629	0.732	11630	15880	0.201	0.357	2325.12	0.475	0.472	0.476	0.501	0.476	0.471	0.522	0.467	0.273	4.737	-7.981	33
3815	rpsJ	b3321	311	0.751	13810.4	18386.8	0.165	0.34	2234.55	0.441	0.388	0.492	0.383	0.424	0.412	0.413	0.444	0.262	4.417	-6.181	238
3821	tufA	b3339	1184	1.387	13937	10048.1	0.276	0.357	1600.3	0.444	0.449	0.427	0.29	0.318	0.357	0.322	0.438	0.29	4.839	-7.381	71
3822	fusA	b3340	2114	0.473	6340.75	13417.5	0.178	0.37	1880.24	0.479	0.467	0.492	0.389	0.473	0.445	0.422	0.479	0.28	4.86	-6.181	28
3823	rpsG	b3341	539	1.373	12148.1	8849.98	0.18	0.347	1756.08	0.439	0.435	0.435	0.388	0.408	0.397	0.398	0.441	0.257	3.743	-6.181	97
3824	rpsL	b3342	374	1.059	12181.8	11505.8	0.186	0.363	2106.76	0.494	0.494	0.482	0.336	0.424	0.482	0.37	0.507	0.268	2.908	-7.781	126
3827	yheN	b3345	386	0.26	37.304	143.521	0.351	0.361	16.016	0.455	0.438	0.469	0.459	0.425	0.398	0.443	0.459	0.205	3.813	-6.881	0
3828	yheO	b3346	722	0.477	70.487	147.78	0.338	0.304	22.751	0.423	0.428	0.402	0.374	0.408	0.411	0.385	0.424	0.231	3.657	-9.881	167
3829	fkpA	b3347	812	1.603	882.228	550.424	0.212	0.325	152.443	0.399	0.393	0.405	0.398	0.398	0.374	0.418	0.399	0.267	5.219	-6.181	488
3830	slyD	b3349	590	1.052	2080.16	1977.98	0.204	0.387	378.849	0.43	0.402	0.453	0.48	0.439	0.427	0.458	0.429	0.25	6.52	-7.781	95
3839	ppiA	b3363	572	1.796	307.979	171.479	0.268	0.32	38.202	0.393	0.405	0.374	0.425	0.473	0.415	0.44	0.381	0.247	3.948	-7.381	12638
3848	trpS	b3384	1004	1.109	543.344	489.99	0.254	0.367	79.631	0.39	0.39	0.39	0.303	0.348	0.356	0.315	0.392	0.263	4.572	-5.181	-7
3849	gph	b3385	758	0.524	117.3	223.81	0.311	0.379	36.149	0.473	0.483	0.46	0.299	0.356	0.429	0.319	0.48	0.236	4.818	-4.981	-7
3850	rpe	b3386	677	1.091	223.507	204.952	0.287	0.352	33.366	0.419	0.433	0.402	0.296	0.359	0.376	0.346	0.423	0.245	4.527	-8.681	18
3851	dam	b3387	836	0.25	38.51	154.251	0.335	0.36	28.738	0.514	0.555	0.465	0.38	0.463	0.489	0.438	0.487	0.22	3.507	-2.181	107
3852	damX	b3388	1286	0.57	315.075	552.7	0.222	0.365	91.207	0.437	0.441	0.43	0.344	0.371	0.388	0.391	0.439	0.241	4.578	-8.081	92
3853	aroB	b3389	1088	0.143	87.977	616.804	0.272	0.401	78.052	0.528	0.531	0.516	0.531	0.522	0.507	0.509	0.519	0.219	3.934	-9.081	57
3854	aroK	b3390	521	1.005	1157.12	1151.6	0.232	0.331	214.111	0.431	0.438	0.408	0.323	0.384	0.389	0.346	0.433	0.24	5.139	0.019	401
3860	nudE	b3397	560	0.619	116.346	188.099	0.328	0.364	30.827	0.436	0.422	0.445	0.39	0.436	0.424	0.442	0.436	0.21	4.555	-0.281	4566
3863	ompR	b3405	719	1.324	218.637	165.167	0.314	0.367	25.847	0.436	0.424	0.435	0.297	0.352	0.389	0.365	0.436	0.26	4.403	-6.181	7490
3869	glpR	b3423	758	1.076	137.725	128.002	0.374	0.367	20.19	0.461	0.46	0.452	0.302	0.339	0.452	0.342	0.468	0.251	4.379	-5.781	17
3870	glpG	b3424	830	0.448	60.227	134.494	0.327	0.389	18.392	0.49	0.49	0.488	0.41	0.421	0.438	0.389	0.487	0.213	2.92	-3.581	45
3871	glpE	b3425	326	0.932	119.638	128.321	0.32	0.348	21.052	0.452	0.438	0.463	0.409	0.417	0.434	0.375	0.451	0.236	4.85	-4.881	1898
3878	asd	b3433	1103	1.495	694.134	464.29	0.254	0.395	44.539	0.438	0.411	0.455	0.344	0.405	0.442	0.39	0.439	0.23	3.794	-5.181	843
3896	rpoH	b3461	854	0.67	353.212	526.97	0.252	0.392	89.939	0.452	0.442	0.453	0.299	0.391	0.436	0.367	0.455	0.286	4.341	-6.281	245
3897	ftsX	b3462	1058	0.334	70.943	212.416	0.315	0.397	23.929	0.48	0.463	0.496	0.395	0.427	0.47	0.449	0.483	0.243	3.285	-9.481	-7
3898	ftsE	b3463	668	0.376	91.048	241.952	0.328	0.409	30.401	0.468	0.47	0.456	0.359	0.341	0.415	0.359	0.476	0.246	4.229	-6.181	3
3899	ftsY	b3464	1493	0.918	193.662	211.072	0.351	0.365	35.772	0.443	0.437	0.441	0.375	0.364	0.363	0.359	0.445	0.252	6.089	-8.981	1008
3901	sirA	b3470	245	1.98	232.37	117.367	0.3	0.353	21.854	0.404	0.419	0.381	0.354	0.38	0.412	0.373	0.4	0.232	4.502	-3.581	1520
3912	prlC	b3498	2042	1.517	240.79	158.739	0.302	0.383	20.698	0.431	0.428	0.433	0.393	0.407	0.442	0.389	0.432	0.262	4.742	-5.181	2523
3933	yhjR	b3535	188	0.379	48.139	127.072	0.342	0.283	18.968	0.403	0.385	0.416	0.323	0.356	0.388	0.346	0.426	0.211	3.992	-7.081	3795
3939	dppA	b3544	1607	1.465	189.611	129.403	0.34	0.345	22.191	0.425	0.404	0.443	0.363	0.416	0.4	0.384	0.424	0.272	4.461	-6.181	1079
3944	yiaF	b3554	710	1	431.821	431.733	0.226	0.346	99.813	0.375	0.424	0.33	0.432	0.457	0.469	0.427	0.367	0.224	3.853	-8.681	1401
3947	glyS	b3559	2069	0.965	1068.43	1107.55	0.214	0.399	116.832	0.46	0.458	0.459	0.266	0.32	0.406	0.309	0.465	0.267	5.034	-6.181	10
3948	glyQ	b3560	911	0.963	941.565	977.618	0.219	0.387	102.803	0.423	0.391	0.447	0.369	0.325	0.36	0.346	0.428	0.273	3.803	0.019	95
3954	bax	b3570	824	0.56	72.995	130.451	0.365	0.341	33.664	0.474	0.461	0.485	0.34	0.487	0.515	0.464	0.472	0.2	2.233	-7.781	3932
3968	yibT	b4554	209	1.13	79.179	70.063	0.376	0.299	22.733	0.402	0.392	0.402	0.364	0.346	0.386	0.37	0.404	0.216	3.386	-6.181	5361
3969	cysE	b3607	821	0.711	80.861	113.755	0.366	0.373	19.262	0.465	0.468	0.429	0.344	0.346	0.399	0.359	0.467	0.239	3.932	-6.181	80
3970	gpsA	b3608	1019	0.281	103.675	369.535	0.288	0.409	58.073	0.503	0.509	0.493	0.479	0.56	0.621	0.559	0.476	0.234	4.2	-5.181	0
3971	secB	b3609	467	2.112	1983.52	938.975	0.186	0.329	216.502	0.354	0.321	0.386	0.232	0.253	0.285	0.249	0.37	0.255	4.767	-5.481	63
3972	grxC	b3610	251	0.89	596.027	669.767	0.213	0.314	160.028	0.457	0.417	0.477	0.33	0.397	0.402	0.367	0.473	0.26	4.641	-7.781	142
3973	yibN	b3611	431	0.872	612.932	702.84	0.23	0.366	171.891	0.424	0.428	0.411	0.384	0.311	0.369	0.379	0.438	0.252	3.459	-6.181	4032
3975	tdh	b3616	1025	0.882	267.363	303.047	0.263	0.366	43.673	0.445	0.426	0.464	0.365	0.411	0.459	0.443	0.447	0.25	4.05	-8.581	10
3976	kbl	b3617	1196	0.871	247.408	284.074	0.279	0.376	34.461	0.456	0.419	0.493	0.373	0.328	0.324	0.381	0.463	0.248	4.629	-6.181	275
3980	rfaY	b3625	698	0.733	51.382	70.051	0.395	0.258	19.316	0.382	0.384	0.379	0.305	0.38	0.356	0.363	0.379	0.208	3.164	-3.381	18
3981	rfaJ	b3626	1016	0.668	39.599	59.265	0.416	0.248	20.309	0.354	0.349	0.353	0.326	0.375	0.327	0.362	0.351	0.178	2.443	-5.481	40
3982	rfaI	b3627	1019	0.528	23.766	44.992	0.421	0.278	16.052	0.387	0.379	0.389	0.43	0.403	0.355	0.402	0.386	0.18	2.724	-9.481	0
3987	rfaQ	b3632	1034	0.571	45.252	79.232	0.373	0.308	16.874	0.411	0.399	0.422	0.382	0.325	0.359	0.359	0.415	0.188	2.871	-3.381	2245
3989	rpmG	b3636	167	0.891	7654.82	8588.78	0.211	0.245	2886.94	0.389	0.357	0.408	0.322	0.369	0.373	0.351	0.395	0.274	3.803	-5.181	21
3990	rpmB	b3637	236	1.583	19067.1	12046.5	0.199	0.346	2387.74	0.408	0.402	0.403	0.405	0.422	0.382	0.412	0.403	0.254	2.953	-6.181	217
3993	rph	b3643	686	1.396	387.394	277.527	0.24	0.387	63.052	0.426	0.426	0.418	0.405	0.392	0.393	0.418	0.429	0.259	4.342	-6.181	2939
4006	ilvN	b3670	290	1.672	124.156	74.235	0.378	0.295	22.031	0.375	0.344	0.383	0.266	0.309	0.332	0.306	0.395	0.239	3.795	-8.581	4
4007	ilvB	b3671	1688	1.297	141.707	109.249	0.351	0.396	22.759	0.439	0.424	0.455	0.291	0.371	0.353	0.324	0.44	0.239	3.938	-6.581	106
4018	ibpA	b3687	413	1.488	260.339	174.905	0.263	0.288	45.705	0.387	0.353	0.408	0.275	0.235	0.289	0.276	0.403	0.255	4.437	-7.781	640
4025	yidA	b3697	812	1.631	139.719	85.649	0.342	0.332	21.796	0.42	0.424	0.412	0.496	0.465	0.458	0.504	0.415	0.254	4.925	-5.281	115
4027	gyrB	b3699	2414	1.203	496.775	412.9	0.25	0.392	62.626	0.448	0.44	0.443	0.385	0.41	0.377	0.394	0.449	0.28	4.636	-6.281	29
4029	dnaN	b3701	1100	0.615	173.989	282.833	0.284	0.394	39.572	0.463	0.468	0.458	0.406	0.435	0.469	0.415	0.462	0.254	4.74	-0.081	5
4030	dnaA	b3702	1403	0.362	104.651	289.314	0.293	0.378	42.052	0.47	0.484	0.448	0.474	0.498	0.472	0.507	0.468	0.226	3.558	-6.181	11543
4038	phoU	b3724	725	0.542	124.875	230.424	0.307	0.386	26.946	0.474	0.46	0.459	0.323	0.385	0.384	0.38	0.482	0.266	4.379	-7.781	15
4039	pstB	b3725	773	1.303	231.466	177.591	0.309	0.352	25.235	0.407	0.411	0.402	0.295	0.308	0.326	0.317	0.413	0.275	3.532	-7.481	183
4042	pstS	b3728	1040	0.911	115.667	127.014	0.333	0.353	24.979	0.408	0.415	0.394	0.373	0.385	0.38	0.375	0.409	0.264	4.445	-7.781	314
4043	glmS	b3729	1829	0.997	614.796	616.741	0.224	0.374	94.546	0.429	0.435	0.418	0.342	0.419	0.448	0.36	0.426	0.256	4.33	-3.581	162
4044	glmU	b3730	1370	0.638	387.116	607.006	0.238	0.367	98.071	0.46	0.463	0.445	0.508	0.543	0.514	0.53	0.455	0.257	4.519	-3.281	353
4045	atpC	b3731	419	0.29	1093.48	3765.6	0.198	0.39	481.388	0.538	0.546	0.522	0.508	0.566	0.521	0.554	0.531	0.246	4.663	-9.481	21
4046	atpD	b3732	1382	0.685	2296.39	3352.55	0.183	0.385	328.524	0.449	0.456	0.441	0.41	0.477	0.517	0.45	0.447	0.297	4.791	-6.181	27
4047	atpG	b3733	863	0.325	865.096	2663.16	0.186	0.394	262.51	0.495	0.489	0.494	0.339	0.311	0.374	0.314	0.506	0.281	3.707	-10.081	51
4048	atpA	b3734	1541	0.752	2750.31	3656.82	0.189	0.381	440.254	0.455	0.461	0.442	0.29	0.307	0.34	0.302	0.461	0.28	3.889	-9.081	13
4049	atpH	b3735	533	0.19	736.299	3871.14	0.194	0.386	522.496	0.522	0.541	0.468	0.509	0.539	0.542	0.52	0.517	0.23	4.434	-13.281	15
4050	atpF	b3736	470	0.228	1173.6	5141.84	0.181	0.358	839.773	0.521	0.55	0.484	0.458	0.53	0.566	0.498	0.518	0.258	4.329	-6.181	62
4051	atpE	b3737	239	1.796	7167.81	3990.13	0.166	0.365	793.296	0.355	0.354	0.338	0.318	0.316	0.346	0.321	0.345	0.29	3.019	-6.181	47
4052	atpB	b3738	815	0.426	747.934	1754.32	0.252	0.357	304.809	0.481	0.467	0.49	0.355	0.457	0.474	0.401	0.482	0.254	2.044	-5.181	9
4053	atpI	b3739	380	0.019	11.959	631.404	0.333	0.388	112.801	0.537	0.526	0.488	0.377	0.402	0.5	0.391	0.557	0.199	0.696	-7.781	617
4055	mnmG	b3741	1889	0.916	280.754	306.573	0.284	0.374	46.074	0.456	0.45	0.454	0.398	0.375	0.454	0.417	0.458	0.243	4.125	-6.181	379
4056	mioC	b3742	443	0.784	248.097	316.524	0.274	0.316	71.678	0.414	0.468	0.357	0.492	0.431	0.45	0.483	0.411	0.229	5.296	-7.781	90
4061	yieP	b3755	692	1.379	108.243	78.473	0.408	0.33	18.411	0.389	0.367	0.4	0.354	0.321	0.363	0.373	0.391	0.203	3.516	-6.081	5801
4065	ppiC	b3775	281	2.787	559.486	200.728	0.27	0.321	64.131	0.343	0.309	0.376	0.338	0.25	0.293	0.327	0.369	0.251	4.262	-3.281	438
4068	gpp	b3779	1484	0.228	27.487	120.494	0.438	0.395	15.809	0.576	0.557	0.494	0.665	0.622	0.664	0.621	0.556	0.23	3.759	-6.081	136
4069	rhlB	b3780	1265	0.998	352.85	353.496	0.275	0.368	55.204	0.445	0.481	0.406	0.552	0.432	0.471	0.529	0.445	0.249	4.191	1.319	18722
4071	hemY	b3802	1196	0.377	49.285	130.576	0.351	0.378	24.487	0.435	0.455	0.414	0.473	0.392	0.428	0.47	0.435	0.262	4.224	-8.681	3
4072	hemX	b3803	1181	0.742	94.806	127.784	0.329	0.375	24.836	0.435	0.433	0.436	0.388	0.462	0.414	0.413	0.434	0.247	4.681	-5.181	22
4074	hemC	b3805	941	0.833	137.412	165.014	0.317	0.379	26.785	0.469	0.473	0.448	0.421	0.429	0.497	0.443	0.472	0.239	4.626	-4.681	2973
4075	cyaY	b3807	320	1.884	416.131	220.846	0.292	0.332	42.872	0.407	0.397	0.417	0.416	0.384	0.38	0.432	0.406	0.264	5.861	-5.181	6233
4080	yigI	b3820	467	1.831	155.015	84.665	0.332	0.355	17.387	0.45	0.412	0.426	0.385	0.372	0.348	0.384	0.448	0.241	3.614	-7.381	3742
4082	metR	b3828	953	1.282	163.466	127.557	0.303	0.389	56.723	0.437	0.426	0.437	0.334	0.408	0.442	0.401	0.438	0.199	3.629	-4.381	2538
4090	yihA	b3865	632	1.311	323.36	246.57	0.292	0.367	57.589	0.435	0.424	0.438	0.426	0.427	0.432	0.461	0.437	0.261	4.567	-6.181	3104
4093	glnA	b3870	1409	1.663	151.094	90.829	0.333	0.338	17.956	0.405	0.41	0.395	0.356	0.346	0.324	0.357	0.405	0.28	4.222	-8.981	5569
4102	fdhE	b3891	929	0.961	135.902	141.386	0.306	0.375	30.158	0.46	0.482	0.438	0.301	0.451	0.484	0.387	0.46	0.241	4.017	-3.581	-3
4115	cpxA	b3911	1373	0.206	21.352	103.702	0.381	0.382	16.06	0.484	0.475	0.489	0.412	0.441	0.433	0.409	0.486	0.251	4.169	-4.081	-3
4116	cpxR	b3912	698	1.274	260.511	204.551	0.31	0.336	34.468	0.388	0.376	0.39	0.325	0.303	0.335	0.362	0.384	0.231	4.29	-11.181	5070
4117	tpiA	b3919	767	1.653	862.789	522.017	0.22	0.362	140.729	0.366	0.375	0.356	0.31	0.335	0.337	0.338	0.368	0.263	3.964	-6.181	108
4123	rraA	b3929	485	0.565	232.398	411.663	0.273	0.381	61.093	0.489	0.473	0.501	0.463	0.442	0.52	0.473	0.495	0.249	4.988	0.319	93
4124	menA	b3930	926	0.563	49.475	87.893	0.359	0.373	15.843	0.432	0.423	0.442	0.458	0.395	0.451	0.43	0.435	0.218	2.146	-2.881	67
4125	hslU	b3931	1331	1.419	805.2	567.625	0.211	0.37	87.812	0.423	0.427	0.417	0.318	0.341	0.356	0.325	0.426	0.282	4.707	-7.381	10
4126	hslV	b3932	530	0.967	526.987	545.042	0.225	0.352	77.316	0.415	0.398	0.427	0.327	0.349	0.359	0.335	0.422	0.267	4.374	-8.681	93
4127	ftsN	b3933	959	0.46	84.63	183.988	0.267	0.384	36.577	0.455	0.448	0.451	0.398	0.439	0.45	0.384	0.455	0.221	3.691	-1.381	92
4131	metJ	b3938	317	1.745	1146.84	657.078	0.24	0.328	148.393	0.396	0.375	0.415	0.339	0.352	0.357	0.344	0.403	0.245	5.024	-5.181	8645
4137	yijP	b3955	1733	0.631	60.918	96.485	0.298	0.335	27.454	0.383	0.393	0.374	0.315	0.348	0.328	0.341	0.384	0.248	3.301	-4.981	182
4138	ppc	b3956	2651	1.535	219.688	143.101	0.297	0.373	19.962	0.42	0.422	0.418	0.3	0.35	0.406	0.339	0.418	0.279	4.239	-6.981	598
4140	sthA	b3962	1400	1.232	125.388	101.812	0.369	0.345	26.305	0.453	0.463	0.44	0.374	0.471	0.492	0.443	0.449	0.237	3.885	-3.281	1380
4141	trmA	b3965	1100	1.152	182.089	158.029	0.317	0.352	40.298	0.449	0.439	0.45	0.465	0.415	0.424	0.447	0.451	0.245	4.236	-5.181	10806
4142	coaA	b3974	950	1.017	78.087	76.789	0.399	0.29	18.086	0.397	0.426	0.367	0.341	0.296	0.316	0.338	0.405	0.215	3.183	-0.281	15709
4155	iclR	b4018	824	0.412	61.826	150.138	0.342	0.355	22.27	0.451	0.425	0.45	0.492	0.425	0.426	0.472	0.451	0.222	3.968	-2.881	5825
4158	lysC	b4024	1349	0.837	96.404	115.217	0.35	0.38	16.524	0.475	0.47	0.45	0.414	0.45	0.454	0.442	0.468	0.236	3.941	-7.881	6544
4164	plsB	b4041	2423	0.712	143.508	201.492	0.283	0.389	25.533	0.453	0.46	0.44	0.301	0.363	0.394	0.337	0.455	0.248	3.322	-6.181	3022
4204	yjdM	b4108	335	7.864	476.543	60.601	0.306	0.256	35.801	0.34	0.333	0.346	0.296	0.266	0.31	0.288	0.349	0.289	4.232	-7.481	5447
4227	dcuA	b4138	1301	0.489	82.664	169.19	0.291	0.37	24.312	0.442	0.459	0.423	0.323	0.314	0.322	0.342	0.442	0.254	2.578	-8.181	118
4231	yjeK	b4146	1028	0.643	63.729	99.087	0.392	0.381	15.422	0.458	0.467	0.448	0.345	0.346	0.428	0.358	0.466	0.23	3.762	-2.381	1532
4239	psd	b4160	968	0.958	147.235	153.701	0.298	0.344	28.474	0.404	0.399	0.406	0.372	0.397	0.382	0.404	0.405	0.26	3.94	-9.481	97
4240	rsgA	b4161	1052	0.723	145.256	200.951	0.291	0.378	36.012	0.467	0.477	0.436	0.461	0.465	0.425	0.465	0.464	0.255	4.12	-7.781	1419
4248	ytfB	b4206	638	0.518	42.842	82.655	0.377	0.363	17.465	0.429	0.424	0.434	0.417	0.435	0.477	0.472	0.423	0.229	4.311	-11.081	2604
4256	ppa	b4226	530	1.852	4716.77	2546.43	0.179	0.301	624.313	0.382	0.38	0.374	0.354	0.371	0.374	0.351	0.382	0.268	4.738	-6.081	4959
4257	fbp	b4232	998	1.426	391.161	274.318	0.238	0.363	66.158	0.422	0.407	0.424	0.31	0.314	0.324	0.337	0.427	0.258	4.279	-5.781	1705
4258	yjgA	b4234	551	0.607	245.857	404.928	0.234	0.342	91.036	0.434	0.441	0.427	0.469	0.411	0.391	0.447	0.434	0.267	5.892	-9.981	2035
4264	yjgF	b4243	386	2.296	1554.75	677.035	0.185	0.316	119.721	0.376	0.361	0.387	0.308	0.293	0.354	0.324	0.381	0.291	4.078	-8.681	73
4272	valS	b4258	2855	1.185	691.45	583.288	0.219	0.387	67.907	0.416	0.396	0.437	0.244	0.244	0.264	0.258	0.42	0.288	4.515	-1.681	0
4273	holC	b4259	443	0.189	41.96	221.441	0.391	0.405	27.703	0.588	0.586	0.57	0.491	0.619	0.601	0.55	0.58	0.218	4.395	-1.881	160
4274	pepA	b4260	1511	0.786	273.74	348.456	0.268	0.407	45.11	0.462	0.447	0.453	0.306	0.352	0.415	0.36	0.465	0.246	3.9	-8.981	2610
4294	yjhU	b4295	986	0.566	60.628	107.172	0.394	0.351	18.633	0.461	0.447	0.44	0.34	0.388	0.46	0.371	0.459	0.224	3.64	-4.981	347
4317	iadA	b4328	1172	1.143	130.689	114.311	0.353	0.393	18.551	0.449	0.458	0.441	0.4	0.48	0.476	0.433	0.447	0.241	4.531	-8.681	13
4331	hsdM	b4349	1589	1.063	149.919	141.033	0.352	0.371	18.362	0.438	0.426	0.436	0.35	0.492	0.475	0.436	0.433	0.257	5.16	-3.581	201
4335	yjiY	b4354	2150	0.445	292.409	656.992	0.214	0.397	53.119	0.42	0.417	0.419	0.3	0.276	0.294	0.302	0.424	0.262	2.587	-4.981	2082
4339	yjjA	b4360	494	1.174	121	103.044	0.364	0.335	22.917	0.408	0.443	0.373	0.411	0.393	0.448	0.419	0.408	0.25	4.161	-2.881	49
4344	fhuF	b4367	788	0.592	49.084	82.846	0.346	0.363	17.708	0.453	0.439	0.467	0.427	0.47	0.486	0.443	0.45	0.211	3.367	1.319	1006
4345	rsmC	b4371	1031	1.534	184.611	120.35	0.317	0.404	26.498	0.459	0.447	0.46	0.453	0.413	0.416	0.462	0.46	0.227	4.455	-10.081	6980
4350	yjjK	b4391	1667	1.253	623.732	497.967	0.222	0.386	80.73	0.433	0.44	0.424	0.377	0.443	0.401	0.431	0.433	0.279	5.128	-6.181	2711
4352	rob	b4396	869	0.813	148.37	182.403	0.294	0.363	32.189	0.434	0.425	0.435	0.444	0.351	0.403	0.433	0.439	0.237	3.851	-7.481	4280
4353	arcA	b4401	716	0.977	548.289	561.23	0.233	0.342	120.794	0.432	0.401	0.454	0.283	0.32	0.372	0.293	0.441	0.274	4.566	-4.981	NA
