# Supplementary material for: Operon mRNAs are organized into ORF-centric structures that predict translation efficiency
Source: eLife journal article supplement (doi:10.7554/elife.22037), 2017-01-31
Supplement: supp [file elife-22037-supp-v1.zip › elife_poa_e22037_Supplementary_File_2.xlsx]

## Sheet: Sheet1
Supplementary File 2: In vitro data summary (N = 710)
ID	ID number set by authors indicating gene location on chromosome
Gene	Gene name
bNums	b number
Length	ORF length from the first base of start codon to the last base of stop codon
TE	Translation efficiency of the ORF (average ribosome density/mRNA abundance) in WT cells
Ribosome	Average ribosome density of the ORF (see materials and methods for definition) in WT cells
mRNA	mRNA abundance of the ORF (see materials and methods for definition) in WT cells
Gini_mRNA	Gini calculated from WT mRNA-seq signals of the ORF (to eliminate ORFs with intragenic promoters)
-ΔG/nt	- mRNA free energy per nucleotide calculated from ViennaRNA
Mean_DMS_vitro	Mean of in vitro DMS-seq signals of the ORF
Gini_vitro	Gini of the full-length ORF calculated from in vitro DMS-seq
Gini_vitro_1	Gini of the first half of the ORF calculated from in vitro DMS-seq
Gini_vitro_2	Gini of the second half of the ORF calculated from in vitro DMS-seq
Gini_vitro_-20:40	Gini calculated from in vitro DMS-seq signals in the region from 20nt upstream to 40nt downstream of ORF start codon
Gini_vitro_0:60	Gini calculated from in vitro DMS-seq signals in the region from the first base of start codon to 60nt downstream
Gini_vitro_0:100	Gini calculated from in vitro DMS-seq signals in the region from the first base of start codon to 100nt downstream
Gini_vitro_head	Gini calculated from in vitro DMS-seq signals in the region from the 20nt upstream to 60nt downstream of start codon
Gini_vitro_body	Gini calculated from in vitro DMS-seq signals in the region from 60nt downstream of start codon to the stop codon of ORF
ORF_distance	Distance (nt) between the first base of start codon and the last base of the upstream stop codon
ORF selection criteria for in vitro dataset:
1. Mean_DMS_vitro ≥ 15
2. Length ≥ 150
3. Gini_mRNA < 0.45 (to select genes with relatively constant mRNA level across ORFs, i.e. without internal promoters or terminators)
ID	Gene	bNums	Length	TE	Ribosome	mRNA	Gini_mRNA	-ΔG/nt	Mean_DMS_vitro	Gini_vitro	Gini_vitro_1	Gini_vitro_2	Gini_vitro_-20:40	Gini_vitro_0:60	Gini_vitro_0:100	Gini_vitro_head	Gini_vitro_body	ORF_distance
2	thrA	b0002	2462	0.743248	546.198	734.879	0.260118	0.375727	36.8216	0.507336	0.518509	0.489747	0.406842	0.45433	0.503228	0.446806	0.505227	82
3	thrB	b0003	932	0.484689	279.979	577.646	0.260237	0.42133	28.4651	0.563271	0.56793	0.55441	0.543359	0.584153	0.584526	0.549241	0.558549	2
4	thrC	b0004	1286	0.938706	650.095	692.543	0.230785	0.374596	36.7303	0.523425	0.528418	0.51553	0.321785	0.343472	0.39278	0.351689	0.533751	1
6	talB	b0008	953	2.53224	1397.74	551.98	0.186955	0.361658	60.6277	0.499731	0.465924	0.532947	0.385295	0.389156	0.4226	0.359361	0.503489	2708
8	dnaK	b0014	1916	1.86346	4612.68	2475.33	0.18917	0.345945	165.725	0.518121	0.527522	0.508467	0.467115	0.462673	0.472529	0.451203	0.517572	2270
9	dnaJ	b0015	1130	0.837949	560.577	668.987	0.221049	0.376283	43.6939	0.510609	0.506363	0.514328	0.347136	0.33482	0.422917	0.329173	0.518715	89
14	ribF	b0025	941	0.327865	82.1628	250.6	0.266853	0.387226	21.1393	0.536017	0.515048	0.555765	0.575177	0.459637	0.496595	0.535875	0.540241	8
15	ileS	b0026	2816	1.09723	581.498	529.969	0.236226	0.405653	32.3186	0.543802	0.530927	0.553932	0.505924	0.545893	0.519547	0.527793	0.543164	43
16	lspA	b0027	494	0.185374	94.3168	508.793	0.243507	0.41251	23.0753	0.532199	0.507578	0.548348	0.398403	0.446116	0.507896	0.439884	0.539054	0
17	fkpB	b0028	449	0.577717	112.62	194.939	0.262094	0.375011	15.8286	0.579161	0.572915	0.575503	0.453937	0.557004	0.557971	0.50676	0.581724	125
31	folA	b0048	479	1.31999	223.061	168.987	0.303137	0.377432	16.9844	0.574953	0.583061	0.557588	0.528073	0.570537	0.58714	0.583268	0.575714	192
43	mraZ	b0081	458	0.0935944	35.0411	374.393	0.272041	0.350087	28.3427	0.562902	0.553941	0.569653	0.490829	0.45113	0.522005	0.541273	0.57709	602
45	ftsL	b0083	365	0.274571	66.0096	240.41	0.382244	0.367205	15.6905	0.605862	0.639737	0.521733	0.424843	0.521433	0.583333	0.514374	0.591897	-3
47	murE	b0085	1487	0.551898	151.209	273.98	0.296967	0.421029	19.3532	0.580672	0.602889	0.554926	0.487383	0.648997	0.64654	0.54906	0.577601	-13
50	murD	b0088	1316	0.606226	135.544	223.587	0.289867	0.400137	15.3232	0.544327	0.538217	0.545149	0.443999	0.481792	0.531951	0.472643	0.546935	3
54	ddlB	b0092	920	0.670499	120.624	179.902	0.29888	0.386141	18.4276	0.56523	0.574114	0.553591	0.604586	0.586147	0.618069	0.574248	0.562445	-7
55	ftsQ	b0093	830	0.169948	33.3552	196.267	0.317836	0.384988	16.9463	0.578795	0.574477	0.58078	0.456783	0.532604	0.558292	0.519178	0.581292	2
56	ftsA	b0094	1262	0.509704	158.766	311.487	0.319452	0.384842	24.1987	0.555021	0.526208	0.571219	0.422349	0.366595	0.451573	0.430996	0.563387	-3
57	ftsZ	b0095	1151	1.00171	630.035	628.962	0.239189	0.386273	48.9412	0.51396	0.517313	0.506964	0.41341	0.575548	0.555916	0.487338	0.50992	61
58	lpxC	b0096	917	0.449183	585.618	1303.74	0.227042	0.371134	92.1002	0.547816	0.540082	0.54961	0.492875	0.533526	0.544491	0.50453	0.543796	101
59	secM	b0097	512	0.333398	92.0856	276.203	0.256899	0.351035	18.5031	0.562049	0.572858	0.547674	0.448288	0.480616	0.523067	0.506555	0.565602	231
60	secA	b0098	2705	1.34376	471.501	350.883	0.254354	0.365841	33.5882	0.505858	0.501056	0.510068	0.387511	0.383006	0.402878	0.4106	0.507727	62
65	pdhR	b0113	764	0.413539	230.636	557.712	0.269866	0.374306	46.6245	0.544884	0.533427	0.534932	0.415883	0.477423	0.510721	0.437378	0.542276	1957
66	aceE	b0114	2663	1.10876	4408.44	3976	0.186644	0.365772	307.638	0.479875	0.475733	0.481952	0.366934	0.452697	0.423654	0.400417	0.480238	161
67	aceF	b0115	1892	1.12971	3889.68	3443.07	0.204498	0.405338	269.805	0.527278	0.542632	0.509674	0.394931	0.440676	0.455128	0.420506	0.529785	15
68	lpd	b0116	1424	1.1803	3410.31	2889.37	0.212214	0.362444	239.3	0.484582	0.481735	0.487189	0.327399	0.390795	0.457188	0.347478	0.487904	325
69	acnB	b0118	2597	1.14278	690.914	604.592	0.221286	0.390697	39.0397	0.522096	0.507513	0.537042	0.472844	0.483254	0.501391	0.477823	0.522411	2279
72	hpt	b0125	536	1.42947	678.866	474.906	0.246503	0.349328	49.8343	0.513196	0.548623	0.470059	0.444449	0.534305	0.523927	0.505088	0.510148	2798
85	erpA	b0156	344	1.58121	1152.89	729.115	0.213936	0.300145	69.1714	0.517575	0.473554	0.556373	0.466976	0.483427	0.475796	0.480433	0.524106	82
89	rpsB	b0169	725	1.4015	11884.2	8479.64	0.171052	0.338772	773.218	0.516633	0.541681	0.487326	0.459568	0.505414	0.524339	0.462891	0.516096	6254
90	tsf	b0170	851	1.98158	9456.35	4772.14	0.192278	0.357544	495.399	0.524431	0.528354	0.517815	0.4531	0.516451	0.511419	0.477467	0.523958	258
91	pyrH	b0171	725	0.842856	474.738	563.249	0.222984	0.367062	56.694	0.501996	0.521976	0.482734	0.452346	0.494356	0.472252	0.458586	0.501681	147
92	frr	b0172	557	1.25575	2257.84	1798.01	0.175653	0.336948	153.589	0.481546	0.477148	0.483121	0.370224	0.414728	0.41727	0.393568	0.486157	292
94	ispU	b0174	761	0.314403	102.75	326.811	0.288292	0.360263	32.6762	0.515617	0.506706	0.522802	0.435842	0.553831	0.542495	0.486706	0.510617	186
95	cdsA	b0175	857	0.206064	47.7656	231.8	0.295718	0.372964	19.9928	0.501996	0.524271	0.480881	0.449001	0.501821	0.573967	0.481699	0.501086	13
96	rseP	b0176	1352	0.144368	36.6954	254.179	0.361053	0.382944	22.486	0.56977	0.537425	0.54391	0.504785	0.568186	0.515231	0.521899	0.567514	12
97	bamA	b0177	2432	0.856574	396.135	462.464	0.25017	0.371209	43.4831	0.518952	0.534807	0.500855	0.458523	0.469194	0.583425	0.48326	0.519702	30
98	skp	b0178	485	1.50561	1987.37	1319.98	0.214214	0.358247	113.882	0.522596	0.522314	0.521488	0.466895	0.51989	0.498913	0.512689	0.518986	122
99	lpxD	b0179	1025	0.367283	378.136	1029.55	0.23648	0.379337	82.4076	0.519599	0.525143	0.511682	0.390387	0.483539	0.576028	0.422584	0.521271	4
100	fabZ	b0180	455	1.52714	1413.13	925.344	0.209578	0.340286	100.573	0.532535	0.548418	0.514064	0.417193	0.481438	0.510777	0.498555	0.539794	105
101	lpxA	b0181	788	0.185177	229.727	1240.58	0.202747	0.398858	80.6232	0.570338	0.541563	0.594752	0.530911	0.485658	0.497584	0.502831	0.575812	4
102	lpxB	b0182	1148	0.204778	38.0184	185.657	0.379278	0.403876	16.3959	0.584581	0.590762	0.571256	0.624189	0.653156	0.628396	0.633091	0.558619	0
105	accA	b0185	959	0.917376	739.232	805.812	0.217046	0.360574	70.1828	0.508457	0.488305	0.52918	0.364068	0.39823	0.482689	0.35748	0.514888	13
121	lpcA	b0222	578	1.16129	345.431	297.454	0.290031	0.348028	26.3934	0.501399	0.508636	0.492058	0.460579	0.444813	0.456032	0.467172	0.507569	2727
132	gpt	b0238	458	4.0032	1171.35	292.602	0.216887	0.341223	39.6946	0.496686	0.482958	0.510446	0.398002	0.440385	0.471924	0.417186	0.504863	1772
134	crl	b0240	401	4.85432	974.835	200.818	0.224323	0.339676	29.4167	0.538782	0.540943	0.534086	0.43941	0.403903	0.414027	0.478923	0.557457	58
136	proA	b0243	1253	0.893576	238.944	267.402	0.300677	0.393799	15.6193	0.546906	0.554049	0.538701	0.522215	0.551878	0.588443	0.546841	0.547187	12
212	brnQ	b0401	1319	0.778533	175.249	225.101	0.26713	0.391137	20.6558	0.520019	0.507552	0.53124	0.408294	0.38893	0.479526	0.417327	0.526301	407
216	tgt	b0406	1127	0.9195	645.403	701.906	0.260208	0.360453	72.3352	0.543851	0.509423	0.551819	0.454549	0.445536	0.456721	0.471287	0.546077	56
217	yajC	b0407	332	1.98475	2518.16	1268.76	0.229588	0.32494	146.548	0.534829	0.583401	0.478773	0.326051	0.550786	0.607471	0.471835	0.527553	23
218	secD	b0408	1847	0.266022	174.882	657.395	0.26724	0.380411	59.5204	0.55127	0.559556	0.540441	0.506025	0.5406	0.566805	0.561728	0.542784	28
219	secF	b0409	971	0.281891	162.286	575.703	0.234317	0.379269	51.0531	0.56457	0.547182	0.579806	0.433972	0.488927	0.482753	0.488612	0.569717	11
221	nrdR	b0413	449	0.514943	86.4242	167.833	0.308165	0.340624	17.7571	0.554784	0.566706	0.541725	0.659263	0.583703	0.60051	0.678246	0.548081	2050
223	ribE	b0415	470	1.48997	692.981	465.096	0.278753	0.350787	48.2222	0.524664	0.547506	0.485888	0.548293	0.597443	0.510728	0.574506	0.512502	89
224	nusB	b0416	419	0.816379	495.85	607.377	0.20884	0.377446	53.5077	0.527701	0.525391	0.52591	0.435305	0.491096	0.484742	0.43656	0.53041	20
227	thiI	b0423	1448	1.38762	266.335	191.936	0.282048	0.363564	21.0282	0.536284	0.548735	0.52364	0.445215	0.418182	0.458708	0.444039	0.539109	4442
228	yajQ	b0426	491	1.70498	1276.4	748.633	0.221586	0.340978	62.7619	0.560752	0.582231	0.536877	0.581847	0.55666	0.517053	0.5611	0.558998	1686
230	tig	b0436	1298	1.85355	6246.28	3369.9	0.197738	0.350385	321.558	0.512198	0.52509	0.498379	0.381663	0.460643	0.483213	0.402335	0.513032	344
231	clpP	b0437	623	1.18638	615.161	518.519	0.227315	0.349117	41.3131	0.487961	0.480301	0.49482	0.402261	0.436842	0.449422	0.442141	0.49022	246
232	clpX	b0438	1274	0.63586	528.954	831.871	0.217794	0.379631	54.1108	0.549909	0.543489	0.556465	0.44156	0.496885	0.567402	0.460523	0.551527	126
233	lon	b0439	2354	0.730581	548.193	750.352	0.236456	0.377889	50.4378	0.542097	0.556162	0.523764	0.438656	0.464408	0.539901	0.454928	0.543676	188
234	hupB	b0440	272	2.26118	6902.14	3052.45	0.193428	0.301029	282.597	0.496056	0.494472	0.455747	0.32547	0.400851	0.480354	0.407108	0.510272	209
235	ppiD	b0441	1871	0.625811	206.344	329.723	0.253781	0.354874	36.3534	0.509466	0.50144	0.516694	0.428097	0.43131	0.467835	0.408448	0.511425	192
249	apt	b0469	551	1.91329	1150.43	601.284	0.200241	0.364682	66.2165	0.512703	0.525196	0.495933	0.34399	0.354568	0.434173	0.350917	0.526321	153
251	ybaB	b0471	329	2.18389	1685.64	771.852	0.206122	0.307903	82.0233	0.510286	0.464401	0.550409	0.39933	0.467653	0.468422	0.449292	0.515758	53
252	recR	b0472	605	0.12716	85.5375	672.677	0.220322	0.434017	48.8941	0.583332	0.608833	0.554313	0.482395	0.530586	0.606924	0.539374	0.586505	0
253	htpG	b0473	1874	1.57407	1105.74	702.474	0.20762	0.359968	43.1176	0.50673	0.485111	0.525052	0.367075	0.432272	0.487797	0.441976	0.508956	110
254	adk	b0474	644	2.7325	2098.77	768.077	0.218391	0.334224	79.974	0.508857	0.496569	0.51543	0.43486	0.52057	0.486307	0.476079	0.505527	181
285	cysS	b0526	1385	1.14279	337.229	295.092	0.258478	0.368989	29.0147	0.532388	0.516107	0.545718	0.442076	0.470369	0.45514	0.47451	0.535703	3279
337	ahpC	b0605	563	2.59211	8331.34	3214.11	0.20589	0.315062	341.74	0.493855	0.48381	0.499763	0.35541	0.330619	0.457115	0.35191	0.494892	4199
338	ahpF	b0606	1565	1.32676	590.966	445.422	0.234941	0.363565	36.3451	0.51939	0.510669	0.525366	0.488662	0.432407	0.442498	0.476038	0.522441	245
343	cspE	b0623	209	3.13934	23170.8	7380.79	0.176917	0.277751	893.256	0.494598	0.466873	0.514598	0.367125	0.452001	0.464454	0.432082	0.508589	175
346	tatE	b0627	203	1.93948	360.234	185.737	0.33878	0.316404	17.6667	0.530374	0.530383	0.527694	0.369681	0.51206	0.530383	0.432036	0.534541	126
354	glnS	b0680	1664	1.20691	676.058	560.155	0.21439	0.369309	47.5235	0.524648	0.50903	0.537277	0.526277	0.474178	0.413764	0.527691	0.525209	203
357	seqA	b0687	545	1.097	473.948	432.041	0.248452	0.322624	32.9554	0.47616	0.509226	0.440975	0.398447	0.441411	0.518163	0.428167	0.475891	2871
358	pgm	b0688	1640	0.819985	314.83	383.946	0.258154	0.394201	30.0124	0.566296	0.547987	0.581185	0.466154	0.496238	0.457856	0.461296	0.568958	26
376	sdhC	b0721	389	2.08039	277.633	133.453	0.28398	0.312288	17.4722	0.474474	0.457347	0.48613	0.347678	0.379169	0.402727	0.375097	0.490864	8451
377	sdhD	b0722	347	1.12147	295.024	263.07	0.257594	0.332536	22.0472	0.510761	0.482972	0.541569	0.502138	0.504302	0.452092	0.485085	0.510416	-6
378	sdhA	b0723	1766	0.835534	294.436	352.393	0.256746	0.417072	29.4134	0.540935	0.549313	0.530958	0.368716	0.445402	0.499888	0.445402	0.543771	0
379	sdhB	b0724	716	1.18531	354.699	299.247	0.256556	0.356271	29.1499	0.519399	0.507938	0.529592	0.431139	0.476676	0.439312	0.467169	0.523492	16
380	sucA	b0726	2801	0.629101	278.688	442.994	0.249391	0.38683	32.8672	0.515388	0.49718	0.533901	0.400034	0.537397	0.470785	0.479486	0.514106	301
381	sucB	b0727	1217	1.21407	750.325	618.027	0.226483	0.399581	51.0606	0.527985	0.549432	0.502659	0.410329	0.557993	0.536191	0.462345	0.52623	15
382	sucC	b0728	1166	1.03133	403.665	391.402	0.250675	0.379811	34.7511	0.503957	0.527663	0.47983	0.397669	0.482548	0.525604	0.433126	0.505077	275
383	sucD	b0729	869	1.21563	402.806	331.357	0.251123	0.36817	34.7702	0.529631	0.53756	0.517511	0.349685	0.377731	0.40169	0.397743	0.536197	0
386	cydA	b0733	1568	0.584793	116.18	198.669	0.247994	0.375517	17.6985	0.542407	0.576196	0.506813	0.380145	0.483403	0.537315	0.460987	0.544203	847
387	cydB	b0734	1139	0.372852	88.6429	237.743	0.259763	0.370852	16.727	0.553981	0.576916	0.533228	0.32687	0.432672	0.502606	0.394867	0.55776	16
390	ybgC	b0736	404	0.405843	103.921	256.063	0.277637	0.343243	21.928	0.524125	0.503768	0.541867	0.437642	0.445882	0.481059	0.44671	0.535153	150
391	tolQ	b0737	692	0.640338	126.931	198.225	0.277743	0.335101	23.3303	0.515163	0.534856	0.495099	0.480771	0.537239	0.52682	0.526192	0.512049	-3
392	tolR	b0738	428	0.373704	101.278	271.011	0.315194	0.389322	21.817	0.516371	0.531511	0.496809	0.490412	0.471165	0.480713	0.445108	0.523374	4
393	tolA	b0739	1265	0.386615	58.5481	151.438	0.368248	0.368498	18.6472	0.57539	0.557648	0.585495	0.471952	0.557371	0.571654	0.503573	0.57553	65
394	tolB	b0740	1292	1.02653	642.108	625.516	0.409265	0.380108	69.7292	0.589269	0.531283	0.614282	0.417731	0.4004	0.436132	0.429705	0.595362	133
395	pal	b0741	521	1.88253	4191.3	2226.42	0.175147	0.327313	209.085	0.520393	0.539817	0.495038	0.438778	0.482735	0.531738	0.470773	0.513581	35
396	ybgF	b0742	791	0.511068	350.487	685.794	0.313146	0.368015	66.2244	0.534619	0.552105	0.515282	0.50664	0.623989	0.652707	0.587155	0.512241	10
397	nadA	b0750	1043	1.53563	405.59	264.119	0.26481	0.343365	26.4822	0.484491	0.4581	0.510559	0.339277	0.497554	0.450436	0.455778	0.483346	1696
398	pnuC	b0751	719	0.509466	114.997	225.72	0.271238	0.357218	19.8116	0.507883	0.478628	0.534511	0.380048	0.380018	0.411664	0.377667	0.518049	38
399	aroG	b0754	1052	2.01371	508.293	252.417	0.273762	0.356844	22.045	0.518922	0.516195	0.521328	0.425785	0.472095	0.483667	0.470409	0.521871	1748
408	bioB	b0775	1040	1.49293	526.325	352.544	0.247055	0.360673	25.9179	0.528476	0.548293	0.508307	0.520476	0.500238	0.533243	0.515272	0.529351	3580
409	bioF	b0776	1154	0.25815	77.178	298.966	0.249856	0.449905	15.52	0.555222	0.564773	0.54383	0.470827	0.622544	0.613558	0.569929	0.551425	-3
415	moaC	b0783	485	0.822257	168.442	204.853	0.301847	0.413134	16.8947	0.561033	0.569728	0.52671	0.522264	0.57164	0.552042	0.538343	0.556979	3
426	ompX	b0814	515	2.30214	11141.4	4839.58	0.185121	0.350563	483.459	0.451417	0.430386	0.471645	0.454472	0.446352	0.429156	0.476996	0.450921	7192
430	ybiT	b0820	1592	1.1202	279.216	249.254	0.288328	0.379039	23.261	0.526148	0.518737	0.532678	0.467681	0.410231	0.494296	0.466817	0.529855	1198
462	lrp	b0889	494	1.39729	651.219	466.06	0.238056	0.334251	32.7978	0.514925	0.514702	0.514187	0.354745	0.464558	0.461151	0.408011	0.519805	7055
466	serS	b0893	1292	1.50128	1047	697.408	0.199701	0.367508	62.8646	0.519671	0.510299	0.527745	0.474165	0.546244	0.532396	0.484419	0.518417	91
474	serC	b0907	1088	1.34461	390.524	290.437	0.271452	0.348961	23.9717	0.51949	0.507661	0.530593	0.417287	0.402732	0.412495	0.415546	0.525716	199
478	rpsA	b0911	1673	0.620512	6418.06	10343.2	0.187188	0.357292	1032.76	0.504175	0.50877	0.499261	0.299122	0.464756	0.507531	0.394554	0.50451	111
479	ihfB	b0912	284	1.95303	1667.3	853.697	0.183509	0.28338	100.651	0.461264	0.462761	0.410437	0.420377	0.467547	0.450194	0.436632	0.45278	160
481	msbA	b0914	1748	0.416279	85.3559	205.045	0.278408	0.361985	17.8999	0.516676	0.503162	0.528353	0.573054	0.493635	0.556054	0.55935	0.515396	37
484	ycaR	b0917	182	2.11999	559.176	263.764	0.251161	0.259451	29.4183	0.499775	0.500349	0.495442	0.600535	0.52381	0.487143	0.562374	0.480902	52
485	kdsB	b0918	746	0.90662	273.598	301.778	0.27596	0.357078	27.2775	0.540164	0.529326	0.550368	0.480769	0.54175	0.515593	0.511985	0.539425	-3
490	mukB	b0924	4460	0.522404	116.542	223.088	0.285383	0.402704	16.5762	0.534626	0.529968	0.539332	0.373048	0.437012	0.431099	0.410009	0.536018	0
493	ycbL	b0927	647	0.754794	176.235	233.488	0.267198	0.356151	17.5518	0.531438	0.513368	0.54109	0.497756	0.46358	0.469417	0.466835	0.538163	27
504	rlmL	b0948	2108	1.09579	190.472	173.822	0.298954	0.385123	15.2121	0.551241	0.560209	0.534483	0.405079	0.412578	0.535636	0.409409	0.554589	1350
505	uup	b0949	1907	0.830143	144.608	174.196	0.302128	0.368353	15.434	0.521018	0.523292	0.518323	0.437484	0.478643	0.466525	0.502181	0.518695	12
529	gnsA	b4517	173	3.91546	626.242	159.941	0.291981	0.189711	20.5625	0.488732	0.496029	0.463689	0.420035	0.47952	0.49341	0.444331	0.469555	-10
560	yceA	b1055	1052	1.7876	442.024	247.273	0.270347	0.346027	22.0655	0.503	0.506475	0.497742	0.52303	0.550204	0.504714	0.52496	0.498651	3001
577	rluC	b1086	959	1.09078	240.585	220.562	0.318549	0.374588	22.0108	0.536407	0.561072	0.512061	0.818209	0.702662	0.661451	0.781547	0.522652	118
578	yceD	b1088	521	0.095481	532.897	5581.19	0.262306	0.361823	544.313	0.578803	0.532555	0.561078	0.456627	0.483717	0.504922	0.517567	0.576334	895
579	rpmF	b1089	173	2.77045	19807.8	7149.66	0.144803	0.315491	764.597	0.501842	0.5243	0.468013	0.411685	0.449305	0.519743	0.432025	0.520397	52
581	fabH	b1091	953	0.816368	842.585	1032.11	0.234468	0.394071	93.039	0.528773	0.524493	0.530381	0.46487	0.453985	0.474822	0.44305	0.533392	68
582	fabD	b1092	929	1.10294	1360.46	1233.49	0.221739	0.413692	124.809	0.531505	0.57191	0.493058	0.341148	0.490603	0.546932	0.424036	0.532914	16
583	fabG	b1093	734	0.574222	1547.05	2694.17	0.305704	0.383937	252.488	0.556689	0.52857	0.534875	0.431365	0.519297	0.510753	0.49003	0.555116	13
584	acpP	b1094	236	3.23596	38379.7	11860.4	0.211797	0.290381	1329.45	0.454797	0.414183	0.492671	0.358794	0.362884	0.409609	0.343811	0.484049	211
585	fabF	b1095	1241	0.529772	1238.24	2337.3	0.217365	0.399041	202.447	0.569092	0.563458	0.571942	0.475458	0.538282	0.583643	0.513658	0.569271	88
591	ptsG	b1101	1433	0.436063	539.176	1236.46	0.203895	0.381724	139.865	0.523691	0.548239	0.498472	0.431045	0.459773	0.539122	0.444517	0.526091	295
592	hinT	b1103	359	1.16875	227.021	194.244	0.281792	0.332061	15.4121	0.494417	0.481222	0.502558	0.285183	0.384571	0.449632	0.354201	0.515256	2583
598	ndh	b1109	1304	1.58064	1074.83	679.998	0.228513	0.351956	61.2659	0.481052	0.472805	0.489379	0.48015	0.467805	0.461986	0.462804	0.479908	400
607	icd	b1136	1250	1.96183	2597.54	1324.04	0.214847	0.339056	145.029	0.49085	0.470055	0.510272	0.445842	0.401062	0.416473	0.420998	0.495553	8053
652	kdsA	b1215	854	1.3068	468.662	358.633	0.251822	0.36596	29.5661	0.544957	0.554739	0.523099	0.451061	0.549792	0.562017	0.524506	0.538991	36
664	galU	b1236	908	1.57059	845.631	538.417	0.226871	0.325264	54.6268	0.498656	0.500492	0.494081	0.446528	0.480652	0.520187	0.440927	0.498413	202
667	oppA	b1243	1631	1.88079	1504.91	800.145	0.197499	0.311508	94.2097	0.449963	0.427518	0.470089	0.371215	0.424123	0.44865	0.402151	0.44902	738
668	oppB	b1244	920	0.471738	130.408	276.442	0.266029	0.324011	37.376	0.489999	0.477713	0.502841	0.546748	0.454122	0.445243	0.503054	0.491266	86
669	oppC	b1245	908	0.41861	161.065	384.763	0.263318	0.383789	37.9477	0.513186	0.52374	0.498447	0.378806	0.473352	0.448635	0.44809	0.516531	15
670	oppD	b1246	1013	0.545766	259.753	475.942	0.230838	0.357957	45.8811	0.496936	0.473089	0.519243	0.405344	0.359773	0.404809	0.397545	0.505969	12
671	oppF	b1247	1004	0.667283	276.724	414.703	0.258136	0.358436	44.5374	0.503476	0.510157	0.481579	0.445872	0.502587	0.472928	0.488622	0.503261	-3
672	yciY	b4595	173	1.62668	455.328	279.913	0.293251	0.347341	26.3056	0.555037	0.618684	0.455375	0.600326	0.609845	0.61542	0.656457	0.489851	2020
678	rluB	b1269	875	1.53581	654.265	426.006	0.261895	0.389783	40.9563	0.535839	0.51345	0.556722	0.473196	0.488459	0.464472	0.488994	0.53894	211
680	topA	b1274	2597	0.804737	300.578	373.51	0.259992	0.368263	31.1324	0.527083	0.518334	0.535001	0.474645	0.453612	0.507189	0.425705	0.528337	667
688	pyrF	b1281	737	1.08944	231.03	212.064	0.302092	0.380353	20.2161	0.513353	0.476019	0.548402	0.408048	0.410893	0.473779	0.430999	0.519488	194
689	yciH	b1282	326	1.06468	142.243	133.602	0.333966	0.308528	20.8081	0.508005	0.538601	0.467741	0.458461	0.496799	0.564875	0.475135	0.506344	0
719	ynaJ	b1332	257	2.41712	674.638	279.108	0.289816	0.332451	26.6535	0.527946	0.502086	0.539354	0.485523	0.524058	0.51496	0.525208	0.508232	273
793	ydcY	b1446	233	1.96582	593.655	301.989	0.24786	0.321803	22.3676	0.544477	0.545053	0.529074	0.470926	0.521831	0.562901	0.48719	0.534915	86
826	ydfG	b1539	746	1.70157	374.015	219.806	0.278212	0.362265	18.3445	0.521424	0.533166	0.501218	0.549835	0.500327	0.534446	0.544676	0.518675	2226
859	ydgH	b1604	944	1.59063	277.51	174.465	0.329991	0.34607	19.7716	0.533872	0.519257	0.546366	0.500632	0.509284	0.530807	0.498742	0.534658	3480
866	ydgA	b1614	1508	0.923443	138.295	149.76	0.302078	0.342546	15.3928	0.524616	0.499356	0.549022	0.457233	0.458333	0.441499	0.460811	0.526372	101
882	slyB	b1641	467	2.15392	1853.36	860.458	0.209429	0.348137	87.9429	0.509659	0.488666	0.524205	0.340868	0.411071	0.5058	0.393569	0.518234	4894
888	gloA	b1651	407	3.01094	351.584	116.769	0.290011	0.32769	15.9101	0.45114	0.411638	0.490862	0.42076	0.391487	0.417631	0.419887	0.455436	81
892	sodB	b1656	581	3.91284	3601.93	920.541	0.201016	0.327246	112.611	0.487012	0.470459	0.502804	0.403189	0.457471	0.441395	0.442434	0.489726	128
893	purR	b1658	1025	0.838111	290.028	346.049	0.260213	0.393883	29.2329	0.537888	0.514474	0.557897	0.449645	0.498488	0.50124	0.478239	0.540615	1885
899	pykF	b1676	1412	3.58837	1330.7	370.836	0.209157	0.33238	50.7614	0.499699	0.487946	0.511456	0.41729	0.39873	0.437677	0.416048	0.504559	6963
900	lpp	b1677	236	2.48685	106248	42723.8	0.183552	0.333559	3947.42	0.573407	0.555902	0.584258	0.482218	0.490733	0.558917	0.485552	0.588971	311
929	xthA	b1749	806	2.13482	316.211	148.121	0.317328	0.359938	15.8301	0.560426	0.558231	0.561989	0.641049	0.5635	0.585785	0.614027	0.558689	8026
943	gapA	b1779	995	2.38568	10054.5	4214.52	0.170434	0.314372	378.035	0.509974	0.52163	0.496514	0.406884	0.500425	0.563884	0.45636	0.51008	10243
958	yoaB	b1809	344	2.88735	547.29	189.548	0.256674	0.317122	21.4254	0.517031	0.458641	0.576356	0.475272	0.428589	0.419928	0.459051	0.533084	6557
962	sdaA	b1814	1364	1.2512	201.475	161.025	0.312759	0.395535	15.9303	0.551153	0.53981	0.561584	0.390105	0.443217	0.482598	0.412102	0.553701	184
964	manX	b1817	971	0.927311	180.477	194.624	0.292751	0.349712	22.5255	0.512975	0.510217	0.515269	0.434232	0.44983	0.457375	0.453425	0.515924	2023
965	manY	b1818	800	0.554667	120.093	216.514	0.266279	0.3624	25.5655	0.516299	0.524564	0.504312	0.40316	0.467884	0.472146	0.439991	0.519244	63
966	manZ	b1819	860	0.517678	121.964	235.598	0.261504	0.37214	26.3309	0.538786	0.546704	0.529369	0.427615	0.441813	0.502993	0.421454	0.547458	4
990	argS	b1876	1733	1.40494	399.88	284.625	0.252989	0.381691	28.9941	0.524856	0.527004	0.520648	0.45476	0.557119	0.567791	0.504799	0.524042	5649
995	ftnA	b1905	497	5.73392	323.761	56.4641	0.280006	0.251247	29.4701	0.465756	0.452777	0.474855	0.464694	0.379533	0.40155	0.431393	0.473637	171
997	yecF	b1915	224	7.10143	568.405	80.0409	0.258436	0.277634	20.9949	0.498099	0.543916	0.42987	0.376022	0.483706	0.520726	0.430314	0.494885	4926
1036	yeeN	b1983	716	2.02845	352.307	173.683	0.290569	0.261774	23.607	0.499138	0.481537	0.512659	0.360968	0.443255	0.45874	0.400911	0.503704	343
1069	yegQ	b2081	1361	1.34038	288.786	215.451	0.25737	0.370228	25.1734	0.514892	0.533148	0.487169	0.464582	0.514058	0.512071	0.463928	0.51374	147
1078	metG	b2114	2033	1.6582	440.586	265.701	0.249665	0.379818	26.6936	0.508185	0.496201	0.519928	0.476878	0.428942	0.488447	0.47646	0.508566	7002
1105	yeiP	b2171	572	2.16685	550.511	254.06	0.255972	0.323776	29.3352	0.481357	0.463492	0.498463	0.45787	0.417926	0.45059	0.458466	0.491246	406
1109	spr	b2175	566	0.887228	402.317	453.454	0.236228	0.357279	44.5289	0.511812	0.525374	0.488844	0.383446	0.462479	0.460199	0.422298	0.514918	412
1116	rplY	b2185	284	1.89913	8169.55	4301.73	0.173182	0.270915	470.761	0.448901	0.478885	0.419284	0.321793	0.437895	0.452187	0.398776	0.451665	125
1117	yejL	b2187	227	4.43719	691.778	155.905	0.263969	0.234581	25.298	0.515602	0.528518	0.482538	0.555125	0.491335	0.530175	0.574897	0.507125	1328
1123	rcsB	b2217	650	1.42069	452.511	318.515	0.226361	0.308369	31.8261	0.484774	0.433708	0.530328	0.460884	0.445452	0.426813	0.455716	0.486861	17
1131	nrdA	b2234	2285	1.17522	401.953	342.024	0.234791	0.36323	34.4495	0.503645	0.521341	0.48431	0.378956	0.366811	0.385433	0.376339	0.5065	4576
1132	nrdB	b2235	1130	0.831174	281.17	338.28	0.268482	0.344823	32.3061	0.505855	0.506853	0.500383	0.402879	0.460269	0.503907	0.455114	0.50837	234
1133	yfaE	b2236	254	0.181856	43.1866	237.477	0.311213	0.410669	21.6178	0.57967	0.58888	0.56121	0.606881	0.526805	0.567935	0.585171	0.587795	0
1156	ackA	b2296	1202	1.9914	2610.36	1310.82	0.200807	0.3351	129.186	0.491449	0.459396	0.517375	0.4014	0.451234	0.443105	0.448167	0.492606	4009
1157	pta	b2297	2144	1.11667	956.824	856.854	0.192511	0.374244	65.9475	0.484115	0.481671	0.485087	0.387677	0.468701	0.502154	0.440366	0.484771	75
1160	folX	b2303	362	1.89321	539.833	285.141	0.239461	0.27837	26.8529	0.480283	0.477802	0.476326	0.605023	0.522239	0.45281	0.605875	0.469915	57
1165	fadL	b2344	1340	1.14989	401.463	349.131	0.248028	0.34103	42.9794	0.496665	0.534527	0.456121	0.500459	0.506543	0.524062	0.50711	0.495491	12149
1191	nupC	b2393	1202	0.513358	97.9954	190.891	0.282008	0.331963	19.89	0.525956	0.529573	0.521186	0.577905	0.570754	0.521893	0.586188	0.523676	1715
1199	ptsH	b2415	257	2.93412	5146.55	1754.04	0.162368	0.279105	198.846	0.471639	0.462961	0.465557	0.358559	0.479964	0.443197	0.435357	0.469196	384
1200	ptsI	b2416	1727	0.9437	1228.38	1301.66	0.243911	0.358014	125.79	0.52757	0.532239	0.520039	0.424848	0.496839	0.50251	0.447136	0.527915	45
1201	crr	b2417	509	1.5387	2796.33	1817.33	0.210073	0.331395	181.812	0.469073	0.473178	0.464009	0.374596	0.390065	0.433171	0.381212	0.476365	41
1226	bcp	b2480	470	2.23399	637.21	285.234	0.26459	0.325489	37.9478	0.501014	0.539262	0.459207	0.411339	0.478472	0.478714	0.436622	0.503372	0
1240	yfgD	b2495	359	2.13344	411.719	192.984	0.278493	0.346964	18.0394	0.569217	0.557547	0.580303	0.487301	0.46765	0.512547	0.46451	0.583634	21
1250	suhB	b2533	803	1.39451	741.234	531.538	0.212557	0.36477	57.5672	0.512939	0.487614	0.537513	0.530524	0.546797	0.518894	0.545692	0.507888	10103
1271	pssA	b2585	1355	0.684892	144.776	211.385	0.287827	0.341616	21.4811	0.519344	0.523743	0.508918	0.40976	0.357578	0.397059	0.385745	0.528603	114
1273	bamD	b2595	737	1.2995	536.432	412.799	0.239482	0.35133	40.8065	0.481092	0.473621	0.483467	0.358507	0.456674	0.508851	0.397844	0.482465	11695
1274	raiA	b2597	341	2.26663	386.957	170.719	0.273651	0.252815	20.2019	0.458165	0.460669	0.453448	0.489983	0.492928	0.458672	0.529984	0.448649	271
1286	smpB	b2620	482	2.7734	447.06	161.196	0.244625	0.335498	18.7461	0.502882	0.507843	0.496609	0.452304	0.46676	0.471615	0.483698	0.510187	950
1328	mprA	b2684	530	2.3568	1012.48	429.598	0.216565	0.315547	43.1617	0.499892	0.481139	0.516372	0.398194	0.520586	0.553728	0.467767	0.496406	91
1366	sdaC	b2796	1289	0.696801	657.702	943.888	0.194767	0.355229	97.7349	0.473085	0.501774	0.443928	0.509547	0.462267	0.506564	0.508258	0.466382	557
1367	sdaB	b2797	1367	0.784625	445.4	567.659	0.206876	0.396437	56.8274	0.516034	0.464406	0.56674	0.480495	0.447366	0.430117	0.440329	0.518401	58
1412	fldB	b2895	521	0.781601	128.268	164.109	0.277319	0.327946	15.315	0.517704	0.518843	0.51303	0.456273	0.488018	0.502152	0.477684	0.520292	6242
1413	ygfZ	b2898	980	1.84742	472.103	255.548	0.262869	0.380316	18.4017	0.538924	0.539548	0.533784	0.623899	0.501526	0.533894	0.563072	0.534117	937
1415	zapA	b2910	329	0.723261	300.004	414.793	0.332147	0.269878	40.9933	0.525801	0.456462	0.559268	0.412284	0.517426	0.525526	0.476293	0.518906	10511
1424	metK	b2942	1154	1.86681	3881.82	2079.39	0.181134	0.363735	229.179	0.477713	0.466053	0.489098	0.406295	0.423829	0.438945	0.402404	0.480619	304
1438	yggX	b2962	275	1.63646	500.748	305.995	0.297065	0.294036	31.626	0.477971	0.42829	0.513942	0.413787	0.43867	0.42623	0.433585	0.48346	28
1457	ygiN	b3029	314	1.53996	465.574	302.33	0.234685	0.323121	25.3614	0.54571	0.564299	0.518484	0.555981	0.528723	0.555178	0.562481	0.54739	31
1458	tolC	b3035	1481	1.7821	733.585	411.64	0.228605	0.339595	42.6357	0.511883	0.513876	0.508342	0.460118	0.537287	0.486973	0.466951	0.510926	4659
1459	ygiB	b3037	671	1.82095	314.745	172.847	0.263428	0.377437	17.7414	0.546555	0.51676	0.576695	0.540869	0.449171	0.469826	0.505308	0.556706	148
1460	ygiC	b3038	1160	0.421038	68.295	162.206	0.281517	0.364414	15.1202	0.551322	0.537198	0.563125	0.482716	0.478192	0.588126	0.487604	0.553405	6
1478	rpsU	b3065	215	1.8794	18413.5	9797.53	0.207956	0.310791	738.468	0.606589	0.595383	0.60851	0.479586	0.589174	0.593419	0.52051	0.615458	1294
1479	dnaG	b3066	1745	0.131628	47.2748	359.155	0.335488	0.364997	29.5915	0.591868	0.582044	0.535579	0.580025	0.67655	0.622103	0.633711	0.573682	111
1480	rpoD	b3067	1841	1.15621	1045.33	904.097	0.198212	0.35226	78.7047	0.511932	0.499297	0.521849	0.482357	0.521906	0.480449	0.495911	0.511088	195
1500	yqjD	b3098	305	1.97994	474.573	239.691	0.280976	0.39659	20.6449	0.572436	0.486443	0.658287	0.42212	0.425007	0.491255	0.458121	0.615774	38
1501	yqjE	b3099	404	0.164567	34.7512	211.167	0.279026	0.393391	16.9333	0.560825	0.584235	0.537518	0.553423	0.552339	0.58895	0.578331	0.559127	3
1539	yhbY	b3180	293	2.80692	1632.17	581.479	0.194324	0.329078	80.2045	0.526586	0.512259	0.538559	0.525002	0.44348	0.481315	0.502183	0.550315	7810
1541	ispB	b3187	971	0.744703	193.086	259.28	0.26368	0.357673	24.7654	0.541706	0.53461	0.546877	0.60815	0.602308	0.565747	0.611568	0.536964	3314
1547	lptA	b3200	557	0.924425	214.193	231.704	0.26967	0.306068	21.1061	0.49141	0.489321	0.489231	0.470002	0.50682	0.508968	0.48639	0.488636	-31
1548	lptB	b3201	725	0.842866	171.237	203.16	0.270252	0.374166	16.8721	0.524147	0.518493	0.527532	0.451345	0.489507	0.475389	0.467916	0.525902	7
1549	rpoN	b3202	1433	0.346664	73.7731	212.808	0.300584	0.355318	16.2066	0.53867	0.529178	0.546847	0.520613	0.575398	0.560195	0.542749	0.534747	48
1550	hpf	b3203	287	0.620294	157.251	253.511	0.247819	0.256794	25.0078	0.440593	0.425774	0.451206	0.398394	0.406656	0.437438	0.391941	0.446176	23
1551	ptsN	b3204	491	1.11745	195.878	175.29	0.292035	0.356741	19.5173	0.52174	0.491134	0.544625	0.399861	0.342839	0.431573	0.382997	0.545558	118
1565	yhcB	b3233	398	1.06777	269.411	252.311	0.255249	0.368643	24.5556	0.515959	0.508467	0.505215	0.413778	0.524899	0.556546	0.463991	0.501643	3955
1568	argR	b3237	470	1.42379	315.928	221.892	0.25696	0.305872	22.8934	0.482758	0.461224	0.502133	0.453173	0.37307	0.416529	0.417642	0.499193	1436
1574	accB	b3255	470	1.78141	2847.81	1598.62	0.193318	0.329021	148.349	0.501717	0.544286	0.455375	0.377828	0.363764	0.41626	0.39268	0.518242	402
1575	accC	b3256	1349	0.591595	953.042	1610.97	0.209603	0.383069	129.443	0.539362	0.573415	0.501624	0.56396	0.627521	0.59472	0.612624	0.532167	11
1578	prmA	b3259	881	1.59332	261.462	164.099	0.281411	0.372191	17.6162	0.516308	0.496732	0.535195	0.462885	0.457242	0.424742	0.445364	0.520457	12
1579	dusB	b3260	965	0.0241591	35.794	1481.59	0.284341	0.374497	157.456	0.577922	0.575647	0.564258	0.559437	0.552747	0.546886	0.569752	0.577486	329
1580	fis	b3261	296	2.05662	4515.79	2195.73	0.205485	0.269122	254.955	0.456523	0.43907	0.472399	0.383015	0.489851	0.474427	0.432439	0.444092	26
1592	def	b3287	509	1.08048	326.626	302.296	0.242207	0.31666	38.4396	0.493471	0.467215	0.51627	0.418269	0.471175	0.43056	0.441637	0.495642	3900
1593	fmt	b3288	947	0.691372	214.445	310.173	0.24125	0.372418	28.1329	0.510149	0.539724	0.481545	0.353702	0.49991	0.516937	0.440111	0.510413	15
1596	mscL	b3291	410	1.3595	192.504	141.599	0.329317	0.310146	17.1654	0.507777	0.500379	0.506885	0.538422	0.467029	0.468824	0.545504	0.505271	130
1609	slyX	b3348	218	1.24594	198.813	159.568	0.344743	0.29289	15.9048	0.535819	0.502245	0.562064	0.522044	0.48929	0.502314	0.554601	0.54592	11420
1614	crp	b3357	632	1.13091	722.475	638.842	0.215426	0.34663	57.1277	0.49427	0.491642	0.494167	0.422082	0.494777	0.483511	0.488784	0.492877	761
1630	hslR	b3400	401	0.320128	82.9051	258.975	0.266949	0.331322	21.1989	0.501066	0.492681	0.50467	0.355743	0.406889	0.461253	0.423436	0.509493	11
1631	hslO	b3401	878	1.30516	475.772	364.531	0.24193	0.360171	26.576	0.502582	0.499919	0.503893	0.421453	0.463517	0.462688	0.453832	0.504308	25
1632	pck	b3403	1622	1.62012	466.87	288.171	0.260748	0.358039	28.4972	0.520568	0.521746	0.51229	0.406262	0.43303	0.471304	0.409386	0.521939	2166
1661	dcrB	b3472	557	1.57653	548.61	347.985	0.235501	0.353124	36.4773	0.502016	0.514834	0.482593	0.474421	0.566775	0.530871	0.524729	0.490238	73
1675	pitA	b3493	1499	0.318415	157.845	495.72	0.252851	0.409186	42.0585	0.577547	0.593831	0.562474	0.549296	0.544647	0.570001	0.541172	0.577535	1749
1676	uspA	b3495	434	4.51223	1089.87	241.537	0.212228	0.287811	31.0963	0.500482	0.513363	0.483921	0.386989	0.441241	0.439138	0.42317	0.509305	970
1705	cspA	b3556	212	2.24015	7347.97	3280.12	0.219443	0.301132	144.552	0.512011	0.460166	0.545793	0.430508	0.40753	0.442776	0.443546	0.541001	281
1744	gpmM	b3612	1544	1.56805	493.417	314.67	0.242122	0.361347	30.5795	0.511639	0.506794	0.514964	0.447533	0.441022	0.449865	0.480344	0.512894	3572
1747	rfaD	b3619	932	1.91573	777.252	405.721	0.24796	0.358884	47.1085	0.483973	0.49078	0.476003	0.426185	0.53095	0.505919	0.479143	0.480547	4927
1748	rfaF	b3620	1046	0.334558	77.2896	231.02	0.33128	0.387447	19.6195	0.541296	0.561164	0.505862	0.569671	0.499131	0.505333	0.516664	0.521949	10
1754	dut	b3640	455	1.19042	415.777	349.271	0.242818	0.380637	32.561	0.524092	0.498449	0.549575	0.383541	0.381943	0.445292	0.419077	0.544301	-19
1755	slmA	b3641	596	0.636796	164.628	258.526	0.257174	0.356695	25.4374	0.533757	0.501618	0.5561	0.468431	0.501383	0.514569	0.516299	0.53097	107
1756	yicC	b3644	863	1.06934	252.71	236.322	0.280467	0.360452	21.7974	0.546292	0.558847	0.531872	0.57277	0.500758	0.525163	0.539421	0.547364	1586
1759	gmk	b3648	623	0.713979	391.423	548.228	0.255952	0.338507	49.8148	0.523151	0.52626	0.519134	0.442343	0.477572	0.489681	0.475199	0.523125	1937
1760	rpoZ	b3649	275	2.16505	2722.07	1257.28	0.186606	0.329455	136.992	0.486084	0.457812	0.507208	0.365946	0.406353	0.435913	0.409849	0.502967	55
1761	spoT	b3650	2108	0.144883	54.4233	375.637	0.416401	0.382443	31.5204	0.622593	0.621067	0.548648	0.436846	0.480724	0.528295	0.484863	0.617335	19
1781	rnpA	b3704	359	0.162053	183.096	1129.85	0.400123	0.327103	98.2424	0.562368	0.576832	0.539129	0.556604	0.600706	0.589098	0.637263	0.52338	17
1782	yidD	b4557	257	0.0851038	67.8642	797.428	0.275735	0.387237	80.4474	0.505079	0.520731	0.487197	0.492358	0.422253	0.466136	0.46765	0.519899	-36
1783	yidC	b3705	1646	0.399178	430.712	1079	0.211371	0.375571	101.75	0.505019	0.49373	0.516968	0.385145	0.513681	0.562913	0.434824	0.504042	3
1795	asnA	b3744	992	1.50332	417.296	277.583	0.306834	0.403206	21.9969	0.598083	0.581339	0.588415	0.583135	0.52129	0.534115	0.570833	0.602793	28546
1797	rbsD	b3748	419	0.231084	53.9386	233.416	0.394622	0.313556	20.0974	0.594057	0.568299	0.575353	0.475833	0.522569	0.576453	0.532849	0.587529	167
1803	yifE	b3764	338	1.5303	3670.73	2398.7	0.246405	0.319112	211.129	0.554849	0.497541	0.600054	0.406459	0.390936	0.412961	0.380697	0.585694	8867
1811	ilvC	b3774	1475	1.67744	521.309	310.776	0.249477	0.37261	32.5055	0.512023	0.52764	0.494685	0.426065	0.443321	0.497548	0.418432	0.515178	1095
1813	trxA	b3781	329	1.9511	2753.05	1411.03	0.206337	0.345289	126.853	0.498911	0.513722	0.481476	0.417135	0.458302	0.489093	0.445638	0.507055	3063
1814	rho	b3783	1259	2.05497	1427.64	694.728	0.206623	0.333312	76.0382	0.500388	0.505974	0.49459	0.420698	0.434002	0.445583	0.421759	0.502798	327
1815	rfe	b3784	1103	0.386694	95.6236	247.285	0.292359	0.363463	21.5242	0.519635	0.535076	0.502461	0.375639	0.458435	0.549567	0.444197	0.522582	240
1816	wzzE	b3785	1046	0.306609	80.57	262.777	0.288779	0.378595	21.6254	0.550034	0.556113	0.533343	0.472011	0.507908	0.502253	0.458649	0.55277	12
1817	rffE	b3786	1130	0.58587	138.296	236.053	0.280617	0.376319	18.9855	0.522083	0.515439	0.527276	0.509101	0.536148	0.489884	0.523415	0.521716	56
1818	rffD	b3787	1262	0.769447	166.853	216.847	0.301127	0.391228	18.7032	0.545786	0.541211	0.548306	0.388779	0.543089	0.517329	0.448785	0.545185	-3
1819	rffG	b3788	1067	0.549383	110.811	201.701	0.336215	0.374686	15.1233	0.531696	0.547723	0.514385	0.486054	0.526493	0.496133	0.542536	0.530183	0
1827	yifK	b3795	1385	0.481543	102.175	212.183	0.285511	0.398007	18.8282	0.536788	0.547112	0.524028	0.363164	0.37575	0.464202	0.357653	0.545686	191
1830	yifL	b4558	203	3.0048	715.141	237.999	0.232506	0.260739	25.3908	0.515709	0.514998	0.508161	0.57548	0.56439	0.518014	0.579973	0.496276	823
1831	dapF	b3809	824	0.3254	87.6337	269.311	0.314938	0.39943	16.7434	0.534716	0.513465	0.554739	0.47786	0.493726	0.491094	0.506486	0.533959	37
1836	corA	b3816	950	0.652708	114.756	175.815	0.310792	0.366316	20.823	0.5255	0.505797	0.540696	0.519434	0.414739	0.451843	0.481362	0.532959	1281
1843	metE	b3829	2261	1.80016	23032.5	12794.7	0.1807	0.385935	725.172	0.494269	0.491939	0.495067	0.415091	0.463058	0.458901	0.450006	0.494722	1078
1846	ubiE	b3833	755	1.2985	421.291	324.444	0.230391	0.346106	27.1446	0.515303	0.508394	0.514396	0.524172	0.4543	0.518197	0.507587	0.51726	95
1847	yigP	b3834	605	0.468512	117.799	251.433	0.282685	0.399702	19.9844	0.56328	0.565915	0.553345	0.487597	0.495382	0.571352	0.479782	0.56715	14
1849	tatA	b3836	269	1.78268	715.013	401.09	0.257493	0.290595	44.6375	0.431864	0.446753	0.419991	0.449024	0.429985	0.461667	0.464459	0.430618	79
1850	tatB	b3838	515	0.241329	98.5426	408.332	0.269262	0.353223	32.4403	0.49256	0.506946	0.470419	0.433638	0.545981	0.524219	0.49538	0.486065	4
1851	tatC	b3839	776	0.189743	44.8972	236.621	0.287637	0.367938	21.2436	0.53411	0.495848	0.568069	0.392688	0.426774	0.462671	0.418547	0.544354	3
1853	ubiD	b3843	1493	0.492094	131.104	266.42	0.282234	0.387964	23.127	0.526807	0.54198	0.510287	0.697146	0.593015	0.555913	0.676316	0.522189	652
1854	fre	b3844	701	0.617495	197.286	319.494	0.280284	0.357332	26.1176	0.527524	0.471165	0.587336	0.4286	0.421785	0.477343	0.441568	0.537431	46
1861	dsbA	b3860	626	2.09037	835.477	399.679	0.242139	0.337061	49.5511	0.515902	0.490318	0.537675	0.495819	0.586391	0.50482	0.560531	0.503786	17
1864	yihI	b3866	509	1.60649	468.85	291.848	0.263272	0.320314	30.9333	0.502397	0.504804	0.474771	0.425472	0.463405	0.484905	0.448939	0.508789	1595
1866	typA	b3871	1823	0.878523	1595.07	1815.63	0.19113	0.361744	140.617	0.506393	0.484786	0.527526	0.555581	0.544374	0.506751	0.552292	0.503669	4989
1882	sodA	b3908	620	2.36725	4119.84	1740.35	0.205843	0.35	123.43	0.49402	0.471972	0.515675	0.486945	0.498183	0.478681	0.477946	0.49169	1316
1887	pfkA	b3916	962	1.27001	395.445	311.372	0.246912	0.376383	25.9603	0.509741	0.51646	0.499962	0.524105	0.53834	0.535477	0.562044	0.502467	181
1894	rpmE	b3936	212	1.71998	5754	3345.39	0.201019	0.286462	347.142	0.478296	0.433969	0.52259	0.493187	0.470451	0.438004	0.479242	0.474629	8253
1895	metB	b3939	1160	0.493136	197.509	400.517	0.249197	0.389095	30.4704	0.546026	0.528534	0.563091	0.502953	0.491906	0.546133	0.49723	0.548548	1447
1896	metL	b3940	2432	0.981557	351.577	358.182	0.253259	0.433993	24.1723	0.552779	0.536945	0.554992	0.434526	0.475427	0.50712	0.455557	0.550462	3
1897	metF	b3941	890	0.966033	938.472	971.47	0.230059	0.356494	91.4146	0.485217	0.503636	0.460919	0.547636	0.585766	0.544263	0.564812	0.473274	349
1911	btuB	b3966	1844	1.40317	187.586	133.687	0.348989	0.352706	16.838	0.527824	0.509119	0.542646	0.542505	0.545946	0.517896	0.552567	0.526804	1509
1915	tufB	b3980	1184	1.56477	31230.8	19958.7	0.212476	0.35853	1690.48	0.51401	0.520234	0.503849	0.303896	0.346449	0.409293	0.363289	0.515489	1897
1916	secE	b3981	383	0.554137	953.694	1721.04	0.20502	0.387415	149.819	0.510536	0.537975	0.46313	0.451886	0.492553	0.530598	0.480221	0.496008	230
1917	nusG	b3982	545	0.948382	1665	1755.63	0.191399	0.385009	160.198	0.542524	0.506986	0.573216	0.482722	0.529995	0.480104	0.500455	0.543808	2
1918	rplK	b3983	428	1.29133	12523.5	9698.18	0.158556	0.366262	1051.31	0.500391	0.490506	0.506266	0.426362	0.473768	0.485145	0.466924	0.504109	159
1919	rplA	b3984	704	0.935114	12600.1	13474.4	0.187911	0.354077	1271.23	0.523361	0.512815	0.532219	0.434502	0.452873	0.499947	0.42758	0.529199	4
1920	rplJ	b3985	497	0.639827	14119.4	22067.6	0.192895	0.361569	1902.83	0.572046	0.578081	0.564333	0.364615	0.346086	0.472238	0.379902	0.598344	413
1921	rplL	b3986	365	1.87034	34118	18241.6	0.172975	0.305753	2142.77	0.441175	0.440304	0.438965	0.428208	0.358723	0.414986	0.427633	0.454314	67
1922	rpoB	b3987	4028	0.752156	1662.41	2210.2	0.198592	0.372649	166.281	0.521059	0.510257	0.529692	0.427398	0.44769	0.454016	0.426391	0.521863	320
1923	rpoC	b3988	4223	0.641611	1691.78	2636.76	0.19846	0.391487	209.51	0.523288	0.515373	0.531008	0.405836	0.388146	0.468609	0.408784	0.524756	77
1929	hupA	b4000	272	2.56523	6826.65	2661.22	0.166865	0.299485	271.778	0.475398	0.466119	0.473092	0.423139	0.417288	0.505822	0.413268	0.493118	187
1934	metA	b4013	929	0.976971	532.254	544.8	0.239075	0.349548	56.2078	0.502822	0.523656	0.457946	0.456406	0.461973	0.479757	0.447141	0.504395	663
1941	pgi	b4025	1649	1.48937	665.6	446.899	0.234256	0.351413	42.5914	0.490809	0.496114	0.484775	0.539558	0.452375	0.484276	0.525055	0.49257	2532
1956	lexA	b4043	608	0.896491	298.497	332.962	0.264727	0.387056	28.3212	0.532733	0.539787	0.510933	0.570481	0.506052	0.527074	0.5617	0.526673	110
1963	dnaB	b4052	1415	0.343913	78.8125	229.164	0.298685	0.374198	15.4271	0.554898	0.536488	0.541459	0.487648	0.467399	0.481535	0.531295	0.558672	1232
1969	ssb	b4059	536	2.40367	1232.91	512.928	0.24832	0.410616	50.4024	0.565029	0.519803	0.60216	0.352468	0.45416	0.480409	0.424466	0.577419	3111
1994	groS	b4142	293	1.90969	5888.91	3083.7	0.202582	0.317509	235.614	0.505659	0.526555	0.480833	0.442894	0.437302	0.510588	0.428433	0.522698	1548
1995	groL	b4143	1646	1.67343	6009.84	3591.33	0.187346	0.36181	261.452	0.486171	0.456273	0.516286	0.293635	0.411138	0.425195	0.38049	0.48941	44
1996	yjeI	b4144	353	1.57422	363.453	230.878	0.259298	0.355921	20.2068	0.522398	0.527581	0.516401	0.465548	0.466583	0.480758	0.451927	0.531476	138
1997	efp	b4147	566	1.74504	3757.79	2153.41	0.17987	0.347668	203.79	0.485943	0.49279	0.476127	0.410969	0.433333	0.457863	0.406351	0.490442	2537
2010	miaA	b4171	950	0.0844394	51.9462	615.189	0.377722	0.393295	51.9674	0.592265	0.545711	0.56895	0.472843	0.536152	0.52077	0.506053	0.589198	-7
2011	hfq	b4172	308	2.46466	3092.84	1254.87	0.201233	0.322013	125.638	0.473438	0.461242	0.476496	0.365665	0.536498	0.486044	0.434004	0.461031	86
2012	hflX	b4173	1280	0.194285	84.7692	436.313	0.289848	0.392383	31.0927	0.570825	0.578768	0.554086	0.50025	0.52316	0.543875	0.477725	0.56981	76
2013	hflK	b4174	1259	0.648658	352.175	542.928	0.240171	0.397371	43.6065	0.537315	0.528642	0.544199	0.356038	0.411007	0.426646	0.365344	0.543111	86
2014	hflC	b4175	1004	0.417035	201.041	482.072	0.226583	0.37245	40.8021	0.511591	0.508698	0.512279	0.440894	0.482591	0.486195	0.474649	0.511759	3
2016	purA	b4177	1298	1.0158	892.294	878.419	0.230896	0.378875	71.1048	0.544607	0.552881	0.527366	0.566034	0.478753	0.492853	0.520809	0.54512	104
2034	rpsF	b4200	395	1.48126	14924.7	10075.7	0.153131	0.336557	871.279	0.568512	0.543623	0.574592	0.353612	0.476273	0.523613	0.423477	0.576639	732
2035	priB	b4201	314	0.0103505	81.7289	7896.15	0.189381	0.388981	706.425	0.597782	0.604294	0.585347	0.581477	0.572287	0.578463	0.548645	0.60084	7
2036	rpsR	b4202	227	1.84224	13484	7319.36	0.16683	0.27141	702.874	0.465552	0.409039	0.512154	0.515411	0.42072	0.400939	0.469387	0.47258	5
2037	rplI	b4203	449	1.02132	9576.81	9376.87	0.164831	0.346637	718.569	0.496673	0.497991	0.491468	0.381693	0.394183	0.477329	0.389597	0.509611	42
2039	fklB	b4207	620	2.68992	815.208	303.06	0.240306	0.367371	29.1015	0.495491	0.504431	0.485529	0.568366	0.461394	0.430899	0.550504	0.499188	837
2044	ytfK	b4217	206	1.07432	231.703	215.675	0.305466	0.278883	19.791	0.512661	0.55905	0.461253	0.502418	0.582342	0.561339	0.544822	0.471178	942
2047	ytfP	b4222	341	0.662065	162.499	245.442	0.260537	0.353372	24.359	0.530638	0.548192	0.50577	0.442237	0.488836	0.49409	0.477152	0.541415	3
2054	mpl	b4233	1373	0.856055	217.006	253.495	0.299867	0.407633	21.9249	0.551061	0.535713	0.566932	0.537679	0.480464	0.503161	0.579268	0.553344	1207
2061	rraB	b4255	416	2.11646	976.059	461.175	0.257561	0.299231	47.0568	0.489064	0.460005	0.509832	0.480134	0.369255	0.375635	0.464935	0.510871	1222
2105	holD	b4372	413	0.18457	40.9753	222.004	0.338794	0.385642	15.8099	0.546503	0.529191	0.541035	0.57299	0.498553	0.528921	0.620657	0.540921	1763
2108	prfC	b4375	1589	1.23538	580.814	470.152	0.231487	0.371882	45.5564	0.496387	0.505295	0.485356	0.397245	0.505081	0.478751	0.430365	0.495269	91
2115	deoB	b4383	1223	0.900132	176.453	196.03	0.26979	0.377604	15.2219	0.550213	0.553426	0.545632	0.548388	0.460162	0.507448	0.506073	0.552995	52
2116	deoD	b4384	719	2.63244	1160.34	440.785	0.228776	0.328804	38.6522	0.457298	0.448116	0.46442	0.374743	0.382732	0.43152	0.361153	0.463622	57
2139	rpsT	b0023	263	1.2516	14515.6	11597.6	0.205825	0.286806	1069.06	0.480938	0.466637	0.491112	0.423182	0.402326	0.447226	0.400374	0.498676	13703
2150	surA	b0053	1286	0.965451	357.211	369.994	0.250722	0.372348	35.4089	0.531201	0.527657	0.532065	0.374005	0.450188	0.48067	0.399993	0.53453	53
2152	rluA	b0058	659	0.260757	49.554	190.039	0.305912	0.404492	20.0032	0.56239	0.595394	0.507229	0.539464	0.612237	0.61073	0.569627	0.550997	12
2167	yacG	b0101	197	1.53651	195.71	127.373	0.327917	0.31401	16.2917	0.496686	0.519813	0.475175	0.473479	0.486052	0.519539	0.464029	0.495526	10
2176	speD	b0120	794	1.22159	387.979	317.602	0.216958	0.274723	43.5804	0.433392	0.412245	0.454536	0.315345	0.345407	0.390009	0.329251	0.439318	16
2177	speE	b0121	866	1.02423	418.27	408.376	0.227156	0.333152	42.1708	0.482985	0.49411	0.466474	0.403162	0.392589	0.416616	0.397594	0.489477	106
2180	can	b0126	662	1.69943	676.041	397.805	0.219805	0.332054	39.643	0.476172	0.469854	0.4754	0.461251	0.424007	0.440954	0.47919	0.478368	3644
2181	panD	b0131	380	2.14655	1187.05	553.005	0.217251	0.343211	57.1852	0.500652	0.493473	0.498252	0.418668	0.536453	0.498431	0.473251	0.484376	1250
2182	panC	b0133	851	0.746465	268.154	359.232	0.220462	0.369001	27.562	0.524447	0.528752	0.518269	0.472584	0.555579	0.593831	0.530638	0.52161	12
2183	panB	b0134	794	1.95918	599.735	306.115	0.239955	0.372015	25.583	0.537591	0.529167	0.545853	0.549912	0.457307	0.455617	0.519208	0.544313	114
2192	pcnB	b0143	1397	0.502046	168.958	336.54	0.248382	0.377437	25.75	0.514058	0.515292	0.50695	0.409424	0.422236	0.52248	0.420944	0.516087	60
2194	dksA	b0145	455	1.4454	1782.91	1233.51	0.193451	0.35044	110.441	0.527194	0.509769	0.543493	0.429983	0.52191	0.463191	0.496202	0.527342	178
2197	hemL	b0154	1280	1.24995	379.328	303.473	0.257252	0.405352	24.4668	0.538396	0.525949	0.550993	0.470361	0.475833	0.520892	0.487978	0.541122	2119
2200	mtn	b0159	698	1.59651	555.994	348.256	0.271656	0.365731	33.9387	0.498147	0.50141	0.491154	0.505151	0.503517	0.522398	0.556798	0.486813	4556
2203	dapD	b0166	824	2.32956	1213.69	520.996	0.235337	0.375485	41.756	0.506974	0.488634	0.524466	0.42809	0.469698	0.492727	0.46337	0.509673	31
2205	map	b0168	794	1.567	782.501	499.364	0.213113	0.342544	44.1752	0.510224	0.477354	0.540533	0.41297	0.438102	0.478181	0.426048	0.515879	24172
2209	proS	b0194	1718	0.879426	869.408	988.608	0.207054	0.389709	78.4133	0.512676	0.5068	0.514912	0.374757	0.457541	0.457922	0.415995	0.513923	112
2212	metQ	b0197	815	1.57203	2131.7	1356.02	0.207541	0.321521	190.242	0.467864	0.467789	0.45963	0.429261	0.470976	0.463596	0.420729	0.464617	40
2213	metI	b0198	653	0.306731	269.798	879.594	0.204995	0.355498	86.6106	0.501877	0.492701	0.502989	0.450451	0.565921	0.593265	0.505731	0.493661	-7
2214	metN	b0199	1031	1.04038	1024.55	984.788	0.198423	0.353065	102.966	0.494469	0.51212	0.472782	0.355188	0.377094	0.433194	0.386607	0.501842	7322
2216	mltD	b0211	1358	0.309928	61.3016	197.793	0.325441	0.382482	21.4966	0.58852	0.603212	0.572508	0.55974	0.510091	0.534656	0.565886	0.5898	72
2223	yafK	b0224	740	1.64619	205.815	125.025	0.308292	0.318595	15.0478	0.511865	0.477376	0.545678	0.47351	0.553783	0.487092	0.477667	0.508052	156
2227	pepD	b0237	1457	1.57517	526.204	334.062	0.248974	0.339918	32.619	0.513357	0.504585	0.517996	0.509166	0.510152	0.524023	0.490162	0.512071	2553
2273	ykgM	b0296	263	1.91985	14097	7342.72	0.207061	0.29057	172.047	0.498203	0.504246	0.488509	0.600475	0.508091	0.524915	0.585687	0.486332	936
2294	frmA	b0356	1109	1.45509	279.394	192.012	0.301324	0.380252	21.7343	0.546074	0.55282	0.535882	0.520646	0.541499	0.569717	0.505206	0.54547	35
2295	frmR	b0357	275	0.356649	68.5124	192.1	0.310134	0.315964	21.3699	0.516254	0.518018	0.512946	0.497018	0.458427	0.492669	0.524947	0.531861	188
2301	hemB	b0369	974	1.25198	297.556	237.669	0.274766	0.366509	22.3926	0.537956	0.515956	0.560436	0.623426	0.570451	0.535316	0.648867	0.535012	2012
2306	ddlA	b0381	1094	1.59185	383.416	240.861	0.271408	0.360009	22.9296	0.501374	0.494491	0.507134	0.426462	0.336834	0.415637	0.411095	0.508558	3912
2308	rdgC	b0393	911	1.40218	226.746	161.71	0.304383	0.344742	16.1259	0.533427	0.494659	0.566477	0.514204	0.465309	0.463075	0.512659	0.536035	1278
2313	tsx	b0411	884	1.62353	893.658	550.441	0.212868	0.334231	56.3719	0.47484	0.494349	0.452552	0.544679	0.506035	0.527477	0.534929	0.469103	299
2318	xseB	b0422	242	1.2043	219.714	182.442	0.274184	0.311983	19.4648	0.509286	0.518271	0.459385	0.559398	0.523348	0.530305	0.541071	0.497077	1708
2322	cyoE	b0428	890	0.13657	222.816	1631.51	0.249153	0.397596	151.538	0.554375	0.55369	0.537572	0.476596	0.482825	0.522151	0.509265	0.560218	12
2323	cyoD	b0429	329	0.700873	1269.18	1810.85	0.196796	0.344468	210.19	0.502939	0.509729	0.49057	0.433082	0.402487	0.494918	0.402655	0.524402	0
2324	cyoC	b0430	614	0.478154	792.839	1658.12	0.214476	0.390782	142.132	0.49747	0.507729	0.478715	0.384827	0.357069	0.438625	0.361165	0.516784	-10
2325	cyoB	b0431	1991	0.346232	633.328	1829.2	0.205905	0.373179	163.517	0.499361	0.51032	0.488616	0.468654	0.479028	0.523521	0.468908	0.496491	22
2326	cyoA	b0432	947	0.546985	1101.14	2013.12	0.177642	0.32226	219.877	0.523447	0.524412	0.519224	0.397409	0.493684	0.518487	0.468097	0.523153	460
2328	yajG	b0434	578	3.9232	587.498	149.75	0.243228	0.299377	22.408	0.459795	0.444591	0.471489	0.35451	0.383773	0.403733	0.379945	0.4686	10685
2336	hha	b0460	218	2.04331	331.148	162.064	0.308788	0.192752	16.8571	0.419094	0.414449	0.408558	0.338613	0.345188	0.429377	0.354228	0.440008	26
2338	acrB	b0462	3149	0.385626	119.143	308.959	0.26409	0.406878	31.4163	0.558582	0.563284	0.553519	0.486919	0.475485	0.549231	0.460603	0.559565	23
2339	acrA	b0463	1193	1.30245	436.294	334.979	0.246579	0.361844	36.6649	0.482299	0.475031	0.486919	0.521585	0.448082	0.457483	0.486915	0.483656	4491
2350	ybbN	b0492	854	1.53652	381.353	248.193	0.253472	0.386944	18.0836	0.553606	0.538706	0.568429	0.428484	0.338174	0.372031	0.407612	0.569042	61
2363	ppiB	b0525	494	1.88382	1934.95	1027.14	0.209213	0.303522	108.54	0.487145	0.450081	0.506583	0.417316	0.424027	0.421443	0.424643	0.493919	1595
2365	ybcJ	b0528	212	1.6614	364.708	219.519	0.24475	0.371698	24.7541	0.585501	0.585221	0.583021	0.381414	0.505709	0.578488	0.435163	0.601656	2
2366	folD	b0529	866	1.68072	292.735	174.173	0.265684	0.373291	19.4612	0.517529	0.529693	0.50326	0.461148	0.474945	0.505922	0.493798	0.520407	6107
2374	borD	b0557	293	2.41954	2265.4	936.294	0.203992	0.256382	103.754	0.463512	0.451382	0.472378	0.531739	0.455734	0.436167	0.51522	0.459613	291
2378	ompT	b0565	953	2.09434	3655.27	1745.31	0.194616	0.277041	210.653	0.441637	0.436507	0.44474	0.470797	0.468981	0.489852	0.481994	0.43707	514
2386	nfsB	b0578	653	3.34262	513.53	153.631	0.239093	0.347458	18.1811	0.544227	0.578223	0.506151	0.547002	0.476103	0.496527	0.530232	0.548741	94
2413	lipA	b0628	965	1.48317	907.711	612.007	0.233437	0.356124	57.2382	0.498154	0.507524	0.487627	0.492011	0.507216	0.507574	0.483998	0.494755	209
2416	ybeD	b0631	263	2.89284	792.448	273.934	0.249417	0.282852	28.4402	0.436033	0.417115	0.448553	0.441871	0.377279	0.368	0.411581	0.448569	110
2417	dacA	b0632	1211	1.44632	338.308	233.91	0.262734	0.338737	28.2682	0.489788	0.466186	0.510616	0.41751	0.406211	0.400732	0.42558	0.492161	139
2422	ybeB	b0637	317	1.52467	736.567	483.099	0.22046	0.385931	46.0938	0.508645	0.50832	0.505308	0.491925	0.499936	0.497223	0.492917	0.506935	260
2427	leuS	b0642	2582	1.35796	757.891	558.11	0.229416	0.376022	49.5417	0.531332	0.518158	0.539345	0.42565	0.394858	0.3766	0.419405	0.534802	787
2438	ybeX	b0658	878	0.563613	144.656	256.657	0.27272	0.342039	16.8104	0.545781	0.520738	0.567221	0.387044	0.393503	0.493215	0.41691	0.557215	90
2439	ybeY	b0659	467	0.814749	184.18	226.057	0.250612	0.37137	17.0205	0.550812	0.59307	0.506062	0.416072	0.474467	0.55555	0.474955	0.560054	-3
2440	ybeZ	b0660	1040	1.18899	256.019	215.324	0.270448	0.377048	16.5242	0.532175	0.537883	0.524331	0.393291	0.480305	0.509245	0.42308	0.53329	153
2441	miaB	b0661	1424	1.46332	421.246	287.869	0.256469	0.38184	30.0595	0.536985	0.543253	0.53048	0.454802	0.468752	0.482511	0.493369	0.54078	2558
2447	fur	b0683	446	0.919553	634.629	690.149	0.214805	0.304686	64.1727	0.498752	0.507366	0.483586	0.441749	0.47103	0.491675	0.442762	0.501112	-7
2449	fldA	b0684	530	2.51755	1253.62	497.952	0.224262	0.323585	60.2635	0.514149	0.499279	0.526899	0.448024	0.467972	0.474555	0.438068	0.508489	140
2472	gpmA	b0755	752	1.89661	2289.44	1207.12	0.196931	0.34488	90.6155	0.50236	0.511729	0.492144	0.479883	0.416522	0.45052	0.416499	0.508884	202
2481	ybhC	b0772	1283	1.00285	282.618	281.816	0.285182	0.372019	23.5486	0.518615	0.507197	0.528234	0.438218	0.433966	0.449628	0.458509	0.520911	152
2483	bioA	b0774	1289	1.02211	214.184	209.552	0.298304	0.398099	18.0183	0.53891	0.540926	0.532789	0.47	0.473995	0.530838	0.472297	0.542221	3857
2507	ybiS	b0819	920	1.99181	423.389	212.564	0.235333	0.366174	31.8822	0.500996	0.482414	0.515107	0.432002	0.418329	0.475403	0.434486	0.504588	2052
2526	artI	b0863	731	1.75611	266.869	151.965	0.294488	0.324323	17.688	0.49593	0.505135	0.484542	0.452049	0.518655	0.493337	0.513973	0.491586	18
2537	ybjX	b0877	992	1.54217	363.311	235.585	0.310604	0.337954	20.0073	0.520226	0.559727	0.477653	0.926614	0.717654	0.61255	0.774123	0.50553	3246
2539	infA	b0884	218	1.73701	2869.15	1651.78	0.205327	0.275826	160.899	0.490441	0.507078	0.471487	0.43236	0.474818	0.506647	0.451437	0.490787	285
2543	trxB	b0888	965	1.02073	709.363	694.954	0.215026	0.365627	54.0256	0.512206	0.526769	0.496097	0.491353	0.442575	0.554895	0.5195	0.515135	12881
2547	pflB	b0903	2282	1.26669	764.556	603.588	0.212546	0.333265	50.9245	0.500689	0.493766	0.506586	0.438026	0.447295	0.473278	0.414121	0.50038	55
2549	ycaO	b0905	1760	1.41877	337.513	237.891	0.247288	0.355773	26.1577	0.514368	0.495876	0.532988	0.568487	0.514948	0.486304	0.562597	0.514318	15990
2551	aspC	b0928	1190	2.98731	436.365	146.073	0.293383	0.35816	19.7373	0.521918	0.526692	0.51572	0.562919	0.568387	0.579076	0.569071	0.518963	185
2552	ompF	b0929	1088	1.98581	6809	3428.82	0.19661	0.336415	334.36	0.490899	0.485522	0.491429	0.501539	0.593519	0.507514	0.5352	0.48251	603
2553	asnS	b0930	1400	1.11921	1182.5	1056.55	0.211375	0.371086	90.9832	0.53353	0.52535	0.540515	0.466961	0.560561	0.550823	0.500029	0.53153	169
2554	pncB	b0931	1202	0.67813	220.571	325.264	0.26348	0.342438	28.9199	0.510668	0.50374	0.502683	0.403652	0.391233	0.466282	0.407703	0.510763	2921
2561	fabA	b0954	518	1.52881	1937.6	1267.39	0.234428	0.384768	113.333	0.519946	0.503304	0.531307	0.456747	0.383164	0.428961	0.458253	0.538662	69
2563	ompA	b0957	1040	1.25323	13316.4	10625.7	0.187559	0.367644	956.936	0.488706	0.491447	0.482505	0.406711	0.457701	0.447067	0.457407	0.488937	357
2569	hspQ	b0966	317	0.342666	91.344	266.568	0.241252	0.371577	21.8889	0.555356	0.610045	0.508506	0.515412	0.524161	0.563315	0.524072	0.560627	58
2572	yccA	b0970	659	0.944785	390.367	413.18	0.237439	0.33997	51.5159	0.4887	0.444244	0.533692	0.418664	0.408686	0.410587	0.468612	0.497651	10612
2623	rne	b1084	3185	1.08261	289.932	267.809	0.255336	0.379717	21.4655	0.534259	0.541776	0.524876	0.39318	0.449898	0.515963	0.423004	0.535457	1644
2632	potD	b1123	1046	1.17167	615.391	525.226	0.237361	0.337055	58.8682	0.4854	0.48204	0.48853	0.440631	0.539589	0.464161	0.48306	0.48162	-3
2633	potC	b1124	794	0.313119	94.7592	302.63	0.351772	0.376851	29.3699	0.535043	0.514063	0.542973	0.489614	0.574166	0.572241	0.523022	0.530364	-3
2634	potB	b1125	827	0.309849	90.9195	293.432	0.276881	0.334135	31.3722	0.502314	0.497129	0.504256	0.586536	0.616904	0.570365	0.587826	0.493393	14
2635	potA	b1126	1136	0.823623	348.74	423.422	0.255119	0.34257	42.7082	0.510031	0.501829	0.518033	0.423364	0.388488	0.421531	0.409742	0.516756	1525
2639	purB	b1131	1370	1.75713	496.795	282.731	0.252247	0.352584	32.431	0.498127	0.474802	0.517931	0.384777	0.497212	0.544638	0.486514	0.497212	4
2641	mnmA	b1133	1106	0.972542	214.876	220.942	0.269608	0.360335	20.4875	0.530851	0.508975	0.54895	0.51341	0.476594	0.505165	0.513567	0.531973	54
2659	minE	b1174	266	0.86844	341.094	392.767	0.274598	0.275564	36.0591	0.452416	0.452925	0.449721	0.583452	0.441964	0.452636	0.521341	0.458105	4
2660	minD	b1175	812	0.962143	393.101	408.568	0.249478	0.358805	35.3589	0.536305	0.500435	0.565023	0.426488	0.471154	0.463535	0.458365	0.540435	24
2661	minC	b1176	695	0.477585	88.7991	185.934	0.320694	0.349065	17.1652	0.506364	0.512729	0.49364	0.471206	0.466347	0.452097	0.474799	0.51084	991
2664	dsbB	b1185	530	0.876924	150.961	172.149	0.30715	0.372528	15.5629	0.541231	0.525406	0.55469	0.511994	0.41358	0.452837	0.503675	0.553624	146
2675	ychF	b1203	1091	1.73583	907.861	523.013	0.219206	0.341448	50.6139	0.491269	0.494945	0.48684	0.365514	0.444308	0.492854	0.389758	0.493369	117
2678	prs	b1207	947	0.942056	1325.37	1406.89	0.190827	0.365945	129.618	0.543853	0.521253	0.564542	0.34022	0.367463	0.370227	0.366382	0.554674	151
2689	purU	b1232	842	1.63347	432.517	264.784	0.28473	0.318777	25.3727	0.486893	0.511955	0.463065	0.40615	0.390474	0.413126	0.412949	0.490827	50
2691	hns	b1237	413	10.6542	8408.88	789.253	0.184927	0.276586	157.174	0.511289	0.497591	0.520266	0.321512	0.373108	0.38075	0.368931	0.529509	2215
2695	adhE	b1241	2675	1.79484	314.038	174.966	0.261644	0.343249	17.5552	0.521685	0.514578	0.528391	0.471509	0.519255	0.513925	0.501854	0.521639	7501
2700	yciA	b1253	398	1.34977	212.864	157.703	0.288709	0.34191	18.4634	0.489874	0.466256	0.51201	0.508692	0.45503	0.448378	0.515628	0.496258	105
2714	yciN	b1273	251	3.44799	557.96	161.822	0.246687	0.276892	25.4865	0.491567	0.494361	0.468854	0.492159	0.43871	0.500114	0.460352	0.51102	7902
2720	rnb	b1286	1934	1.28751	418.296	324.887	0.24197	0.354467	29.0929	0.50214	0.486513	0.518043	0.515067	0.494347	0.481472	0.50459	0.501289	68
2722	fabI	b1288	788	1.89236	3199	1690.48	0.17532	0.360888	152.717	0.493787	0.479435	0.506387	0.384713	0.484935	0.530598	0.446715	0.493768	368
2734	tpx	b1324	506	2.67044	3565.13	1335.04	0.188964	0.329526	143.872	0.472593	0.440272	0.502995	0.42466	0.40858	0.446059	0.421671	0.482332	1059
2740	fnr	b1334	752	1.12139	597.964	533.235	0.250128	0.339229	57.0138	0.480461	0.483399	0.471005	0.540011	0.471858	0.522912	0.563478	0.472797	195
2746	ttcA	b1344	935	1.75761	331.786	188.772	0.286342	0.336706	21.0287	0.50905	0.51784	0.49456	0.347831	0.422557	0.487545	0.426298	0.510851	52
2852	gnsB	b1550	173	5.09789	353.709	69.3834	0.352913	0.153237	20.7292	0.425534	0.358155	0.424616	0.30323	0.334338	0.378622	0.330894	0.435415	172
2878	pntB	b1602	1388	0.270299	53.7122	198.714	0.298477	0.37652	15.6792	0.563933	0.541464	0.58163	0.394132	0.450432	0.503868	0.410008	0.56868	11
2879	pntA	b1603	1532	0.863671	180.754	209.286	0.291343	0.378146	18.2854	0.553508	0.55479	0.548329	0.462367	0.548501	0.509304	0.510265	0.55265	3792
2891	tyrS	b1637	1274	1.16482	605.738	520.025	0.240611	0.366272	52.7759	0.515881	0.526922	0.498045	0.444924	0.508448	0.515963	0.468006	0.515624	129
2899	grxD	b1654	347	2.58171	1284.48	497.533	0.19467	0.342939	54.3491	0.496621	0.466109	0.527372	0.320933	0.370271	0.422016	0.359106	0.524039	2020
2930	ihfA	b1712	299	0.556895	607.194	1090.32	0.209582	0.316522	95.8	0.454087	0.390777	0.457727	0.361623	0.370504	0.37482	0.397231	0.466684	5
2931	pheT	b1713	2387	1.20074	879.611	732.557	0.244169	0.389589	58.5254	0.5152	0.516706	0.512842	0.367651	0.414966	0.487523	0.397349	0.5173	15
2932	pheS	b1714	983	0.984557	681.707	692.401	0.221204	0.363795	51.6384	0.500832	0.500725	0.500155	0.441282	0.422349	0.439347	0.437711	0.504956	284
2934	rplT	b1716	356	1.00117	13177.5	13162.1	0.185574	0.331096	1186.63	0.550967	0.544122	0.551815	0.599751	0.516319	0.558218	0.547196	0.557416	53
2935	rpmI	b1717	197	1.52167	18444.2	12121	0.166483	0.286091	1237.05	0.530652	0.500882	0.555681	0.49038	0.482304	0.50299	0.46966	0.545954	97
2936	infC	b1718	542	0.243334	2122.99	8724.62	0.404228	0.333875	818.277	0.632413	0.442048	0.576656	0.328446	0.409192	0.430068	0.374773	0.629827	4
2937	thrS	b1719	1928	0.944424	1293.56	1369.69	0.248522	0.345742	104.911	0.543158	0.483415	0.582531	0.458269	0.462307	0.508688	0.449649	0.545425	2755
2938	ydiY	b1722	758	1.26627	420.608	332.163	0.268983	0.337599	38.3347	0.489989	0.513012	0.467115	0.476263	0.485227	0.498455	0.477909	0.488895	2614
2960	selD	b1764	1043	1.03709	265.824	256.318	0.265075	0.393682	21.6183	0.53197	0.504844	0.556432	0.494899	0.426961	0.453817	0.484598	0.537658	117
2970	yeaC	b1777	272	1.26303	235.915	186.785	0.298054	0.267353	20.2757	0.454801	0.454149	0.45133	0.420371	0.42142	0.454044	0.43532	0.462536	42
2971	msrB	b1778	413	1.63153	264.292	161.99	0.306648	0.288886	16.638	0.549793	0.505576	0.589242	0.376268	0.403555	0.457358	0.392857	0.573356	2353
2973	mipA	b1782	746	2.30451	1691.39	733.948	0.209081	0.338391	79.6932	0.514112	0.521651	0.50506	0.506975	0.529675	0.56249	0.519463	0.510924	7606
2985	yeaZ	b1807	695	0.813527	159.468	196.021	0.291662	0.405065	17.1562	0.560698	0.583171	0.532551	0.631316	0.629664	0.61931	0.611828	0.552107	58
2990	cspC	b1823	209	4.08544	10240.5	2506.58	0.204847	0.309569	311.289	0.507913	0.474611	0.529531	0.318898	0.390795	0.470751	0.366102	0.544456	13
2992	yebO	b1825	287	0.712911	187.84	263.483	0.301842	0.289338	25.6279	0.474949	0.449306	0.47403	0.519228	0.409154	0.450382	0.512133	0.459133	75
2994	kdgR	b1827	791	1.11492	188.573	169.136	0.329586	0.333679	15.0486	0.532247	0.537891	0.524745	0.490939	0.478614	0.514443	0.498174	0.533019	1596
2995	htpX	b1829	881	0.625641	246.956	394.725	0.219169	0.377264	35.1984	0.498069	0.501664	0.493762	0.51501	0.55369	0.479082	0.526101	0.493375	192
2996	prc	b1830	2048	0.546912	154.741	282.936	0.297663	0.359639	26.0802	0.526506	0.533334	0.516246	0.612561	0.607894	0.576724	0.653317	0.521696	20
2997	proQ	b1831	698	1.1141	1276.58	1145.84	0.200841	0.349799	103.755	0.469875	0.470618	0.467787	0.361329	0.390404	0.476648	0.395934	0.476215	97
2998	yebR	b1832	497	1.04303	233.803	224.157	0.300683	0.365895	17.265	0.529336	0.551214	0.497052	0.446566	0.47681	0.521986	0.488765	0.536093	6185
3007	eda	b1850	641	1.83778	764.14	415.796	0.239423	0.388456	39.5408	0.578291	0.56409	0.588467	0.453503	0.483291	0.512183	0.508927	0.587879	37
3009	zwf	b1852	1475	1.49349	409.908	274.463	0.24924	0.353993	28.0014	0.518449	0.535732	0.501063	0.403496	0.456055	0.493932	0.442127	0.520166	2908
3012	znuA	b1857	932	2.32682	6156.54	2645.9	0.196192	0.34633	45.8771	0.504386	0.500836	0.506911	0.522703	0.458462	0.509287	0.53373	0.50652	1763
3015	ruvC	b1863	521	0.0806802	33.2172	411.714	0.246934	0.416641	33.9817	0.541434	0.551935	0.525706	0.519791	0.609228	0.640682	0.567555	0.518675	35
3016	yebC	b1864	740	1.51694	1169.82	771.167	0.215532	0.355054	68.173	0.49192	0.500772	0.48116	0.368435	0.412007	0.417005	0.403687	0.49964	29
3017	nudB	b1865	452	0.0444141	23.0841	519.747	0.24808	0.392788	38.9409	0.569856	0.59767	0.518986	0.613543	0.601004	0.622311	0.603429	0.560872	118
3018	aspS	b1866	1772	1.31999	713.221	540.323	0.233887	0.370926	47.9076	0.495904	0.501648	0.489749	0.384287	0.369282	0.430117	0.385095	0.499245	4056
3050	uvrY	b1914	656	0.374686	95.0916	253.79	0.318261	0.337774	22.3828	0.533312	0.574882	0.475191	0.415385	0.433165	0.469975	0.449467	0.543505	751
3059	yedD	b1928	413	1.75691	448.994	255.56	0.269442	0.399225	19.1901	0.607562	0.597331	0.612361	0.638061	0.537923	0.603886	0.624066	0.610979	3947
3090	yeeX	b2007	329	2.30509	829.098	359.682	0.238279	0.273678	47.6667	0.448215	0.463983	0.428687	0.445141	0.496252	0.470693	0.476936	0.432813	172
3096	yeeF	b2014	1358	0.530865	838.81	1580.08	0.210165	0.365825	169.263	0.516591	0.509663	0.521904	0.461105	0.522334	0.511684	0.530289	0.513515	267
3101	cld	b2027	980	0.643252	380.22	591.091	0.238973	0.318531	69.9863	0.450194	0.457176	0.441914	0.404227	0.399981	0.417599	0.465562	0.452269	146
3103	gnd	b2029	1406	1.2931	2021.96	1563.65	0.18608	0.34564	158.405	0.471342	0.481235	0.459455	0.389572	0.42924	0.46108	0.410314	0.471965	1673
3107	wbbK	b2032	1118	0.784499	54.4298	69.3816	0.344002	0.242487	16.3939	0.487805	0.492784	0.48026	0.487202	0.582428	0.523542	0.549644	0.479477	-15
3108	wbbJ	b2033	590	0.579634	77.5527	133.796	0.300669	0.27222	22.4171	0.454562	0.451715	0.455403	0.380289	0.375991	0.372153	0.386196	0.458707	-19
3109	wbbI	b2034	992	1.92013	214.178	111.544	0.304111	0.262218	29.5171	0.456683	0.480894	0.431392	0.397014	0.356899	0.413027	0.381583	0.461262	3
3110	rfc	b2035	1166	0.204972	15.6	76.1082	0.37102	0.246441	18.1856	0.447742	0.451566	0.431568	0.415377	0.448021	0.478378	0.432809	0.446687	0
3111	glf	b2036	1103	2.09141	278.185	133.014	0.321061	0.250082	29.6881	0.42762	0.443313	0.400114	0.380236	0.418159	0.385598	0.414211	0.427199	8
3112	rfbX	b2037	1247	0.37316	39.87	106.844	0.345332	0.257835	20.275	0.458593	0.427347	0.489548	0.322108	0.357878	0.421404	0.363018	0.46329	-3
3113	rfbC	b2038	557	0.883709	163.241	184.722	0.266465	0.285583	26.3883	0.465094	0.496868	0.42176	0.368756	0.469239	0.54567	0.434135	0.449355	0
3114	rfbA	b2039	881	1.41993	345.215	243.122	0.26809	0.304642	32.7477	0.468872	0.483467	0.449731	0.229084	0.252931	0.339086	0.224402	0.479425	58
3115	rfbD	b2040	899	1.28955	333.57	258.672	0.241179	0.296407	35.9241	0.477101	0.442416	0.497368	0.42318	0.440888	0.439415	0.464798	0.475862	0
3116	rfbB	b2041	1085	1.43314	466.509	325.516	0.241019	0.307419	43.7831	0.44536	0.443835	0.444244	0.368908	0.446105	0.372677	0.418394	0.443693	373
3117	galF	b2042	893	0.899814	557.889	620.005	0.229819	0.345733	60.2164	0.521503	0.543596	0.493035	0.581129	0.483494	0.53748	0.543586	0.516946	175
3139	dcd	b2065	581	0.495576	121.913	246.002	0.284139	0.44568	19.5924	0.598231	0.592335	0.587869	0.489349	0.522492	0.549993	0.536905	0.605121	92
3140	udk	b2066	641	1.30015	287.225	220.916	0.304556	0.32131	23	0.501273	0.477012	0.524721	0.384724	0.466333	0.461742	0.434337	0.502562	3744
3151	gatC	b2092	1355	0.543751	83.5154	153.591	0.296706	0.387077	20.1448	0.54513	0.525874	0.561836	0.45208	0.500704	0.521464	0.498296	0.546994	4
3152	gatB	b2093	284	0.7415	121.643	164.05	0.312332	0.29669	22.9765	0.48174	0.463791	0.497802	0.438169	0.558262	0.463382	0.479609	0.460722	31
3153	gatA	b2094	452	0.902763	195.172	216.194	0.292343	0.278584	25.2624	0.450443	0.491433	0.403131	0.450564	0.459899	0.42179	0.434535	0.445484	10
3154	gatZ	b2095	1262	1.07394	375.958	350.073	0.26102	0.336482	35.3098	0.477062	0.477764	0.466734	0.491836	0.426027	0.464964	0.471154	0.477498	29
3155	gatY	b2096	854	1.03828	547.021	526.851	0.246437	0.375386	43.6752	0.499219	0.466482	0.528708	0.498815	0.402611	0.380128	0.511675	0.505093	308
3167	mrp	b2113	1109	1.19985	396.367	330.346	0.252074	0.383995	31.9315	0.539813	0.528356	0.547561	0.536587	0.518568	0.533848	0.551576	0.541296	17558
3187	folE	b2153	668	2.28761	1808.01	790.347	0.215883	0.320434	63.9687	0.45644	0.447394	0.465338	0.420729	0.479556	0.448449	0.431175	0.454099	1126
3189	lysP	b2156	1469	0.497164	97.1257	195.359	0.277897	0.395037	21.2903	0.527755	0.555709	0.485504	0.535414	0.4671	0.509401	0.536196	0.5307	205
3200	yejG	b2181	344	1.23027	225.087	182.957	0.324017	0.305581	17.1937	0.461734	0.433622	0.485245	0.487357	0.456699	0.416546	0.472019	0.461432	333
3202	rsuA	b2183	695	1.90194	268.544	141.195	0.263817	0.378878	15.1171	0.515233	0.520005	0.507414	0.431241	0.53335	0.517944	0.460239	0.513284	2457
3203	yejK	b2186	1007	1.25093	205.981	164.663	0.308652	0.374141	16.3344	0.540218	0.570237	0.508584	0.670495	0.596502	0.588082	0.611352	0.530164	6164
3222	mqo	b2210	1646	0.988709	191.866	194.057	0.330162	0.378433	16.2876	0.541183	0.539276	0.541799	0.470765	0.562114	0.545894	0.491848	0.538873	218
3227	ompC	b2215	1103	1.57222	13376.5	8508.01	0.183244	0.341623	913.391	0.485125	0.469969	0.499178	0.45065	0.542002	0.503722	0.479316	0.481416	4278
3234	gyrA	b2231	2627	0.573082	416.702	727.124	0.222305	0.390544	60.0069	0.542746	0.542811	0.541958	0.469197	0.511034	0.572677	0.486282	0.543209	997
3245	yfaZ	b2250	542	1.83848	303.342	164.996	0.341924	0.387306	19.6998	0.556419	0.507656	0.602514	0.485815	0.50072	0.496711	0.479062	0.560577	743
3250	menB	b2262	857	1.7195	312.323	181.635	0.29105	0.383104	16.4432	0.56284	0.553102	0.570581	0.38117	0.476557	0.48762	0.436303	0.567905	15
3258	nuoN	b2276	1457	0.357206	97.8259	273.864	0.266587	0.416424	24.7507	0.564828	0.553808	0.570855	0.470529	0.558605	0.51636	0.516341	0.564886	7
3259	nuoM	b2277	1529	0.349214	92.3771	264.529	0.26265	0.396089	22.958	0.508646	0.513911	0.50271	0.410615	0.519808	0.555404	0.46617	0.507622	164
3260	nuoL	b2278	1841	0.263334	88.6133	336.505	0.297784	0.410071	27.4614	0.56437	0.570809	0.557471	0.451953	0.578314	0.581061	0.550719	0.563616	-3
3261	nuoK	b2279	302	0.363196	115.937	319.213	0.246903	0.361788	26.8168	0.527568	0.556139	0.499462	0.446026	0.494892	0.502917	0.456198	0.529941	-3
3262	nuoJ	b2280	554	0.250629	92.5793	369.388	0.290739	0.401769	30.7429	0.558813	0.578066	0.533361	0.433442	0.489238	0.523254	0.483717	0.564232	12
3263	nuoI	b2281	542	0.72724	214.126	294.436	0.297544	0.359649	29.1735	0.533551	0.527314	0.537124	0.399938	0.388205	0.483108	0.402131	0.54722	15
3264	nuoH	b2282	977	0.258648	97.8591	378.348	0.27303	0.407195	27.0116	0.561696	0.570181	0.551779	0.424564	0.389798	0.517964	0.422641	0.570352	-3
3265	nuoG	b2283	2726	0.605629	302.517	499.508	0.248621	0.416588	33.9878	0.533321	0.538653	0.527379	0.44848	0.517014	0.546313	0.473333	0.533213	53
3266	nuoF	b2284	1337	0.500457	227.501	454.586	0.244747	0.401466	33.7324	0.558947	0.542036	0.577212	0.476293	0.515467	0.489988	0.495838	0.56016	-3
3267	nuoE	b2285	500	0.831282	454.93	547.263	0.255996	0.36934	37.431	0.502925	0.48997	0.512663	0.42342	0.374815	0.405374	0.416606	0.519362	3
3268	nuoC	b2286	1790	0.667824	311.336	466.194	0.229871	0.379782	34.7598	0.509778	0.497346	0.521374	0.397775	0.484855	0.535479	0.443791	0.510485	106
3269	nuoB	b2287	662	0.900337	435.952	484.21	0.244921	0.3729	41.8578	0.546522	0.538774	0.553172	0.373701	0.426277	0.455419	0.429578	0.556425	16
3270	nuoA	b2288	443	0.776855	212.635	273.712	0.239306	0.347111	28.7126	0.53953	0.556843	0.516429	0.434698	0.46961	0.472964	0.479492	0.549879	631
3276	yfcD	b2299	542	0.99375	246.107	247.655	0.270263	0.355129	21.4795	0.522651	0.521845	0.514878	0.420674	0.421785	0.505125	0.426975	0.53233	58
3277	yfcE	b2300	554	0.773458	161.762	209.142	0.293486	0.373285	17.8686	0.588261	0.555341	0.618736	0.562045	0.512701	0.542164	0.567809	0.595755	53
3288	dedD	b2314	662	0.400582	61.8432	154.383	0.329456	0.39855	15.7346	0.598491	0.63363	0.555906	0.391633	0.472453	0.533902	0.440693	0.602703	-10
3290	accD	b2316	914	0.88055	751.455	853.393	0.220469	0.389223	69.3514	0.565823	0.572803	0.542748	0.453292	0.510387	0.495079	0.486939	0.568331	156
3294	pdxB	b2320	1136	0.827974	189.026	228.3	0.296231	0.389921	16.5068	0.545163	0.582697	0.509271	0.557796	0.56	0.595037	0.571011	0.542315	1091
3296	fabB	b2323	1220	1.28383	1318.12	1026.71	0.209568	0.387672	83.0336	0.507221	0.510763	0.503096	0.524124	0.521514	0.540869	0.515469	0.504749	2286
3297	yfcL	b2325	278	2.20605	361.128	163.699	0.330124	0.366978	15.3655	0.549448	0.53263	0.557164	0.466112	0.588686	0.571785	0.488782	0.53308	34
3302	prmB	b2330	932	1.06802	243.671	228.152	0.269789	0.368777	17.5105	0.53753	0.5188	0.555357	0.523451	0.413492	0.476491	0.499581	0.543272	788
3313	yfcZ	b2343	284	3.07909	626.881	203.593	0.272318	0.327042	21.7529	0.599469	0.590922	0.60616	0.433318	0.412346	0.552756	0.42215	0.625896	3318
3338	gltX	b2400	1415	1.32197	1026.97	776.851	0.217417	0.366749	63.8066	0.487421	0.488316	0.484989	0.401307	0.418806	0.432214	0.40968	0.487871	921
3345	zipA	b2412	986	0.302158	120.638	399.256	0.239304	0.383621	27.7106	0.535903	0.548352	0.52172	0.395009	0.63059	0.613475	0.50005	0.526971	5153
3354	yfeX	b2431	899	1.14369	292.995	256.183	0.245734	0.379399	18.0011	0.549158	0.545319	0.546644	0.330452	0.402315	0.467642	0.36302	0.557657	96
3384	bamC	b2477	1034	0.517466	253.608	490.095	0.234606	0.408656	42.6915	0.528632	0.544172	0.511034	0.458575	0.49258	0.544912	0.430806	0.526012	17
3385	dapA	b2478	878	0.804609	430.592	535.156	0.217212	0.362005	44.3039	0.528731	0.524593	0.531967	0.592589	0.44253	0.460786	0.530399	0.53118	15060
3389	upp	b2498	626	1.9011	1452.78	764.181	0.209837	0.37762	88.1977	0.524626	0.506923	0.533789	0.451218	0.463488	0.501644	0.476508	0.530281	5823
3391	guaA	b2507	1577	1.19741	1542.87	1288.51	0.204118	0.387692	110.855	0.510859	0.502769	0.517413	0.460231	0.513721	0.512448	0.514707	0.510753	69
3392	guaB	b2508	1466	2.28941	2541.45	1110.09	0.206047	0.377756	106.061	0.504072	0.52733	0.478144	0.438044	0.380063	0.44138	0.426384	0.508967	1529
3394	der	b2511	1472	1.05554	323.527	306.504	0.269782	0.357561	27.3527	0.521919	0.529497	0.512739	0.469172	0.554825	0.536612	0.493252	0.520642	118
3395	bamB	b2512	1178	0.631856	272.672	431.542	0.250971	0.40281	36.5448	0.538838	0.548385	0.527692	0.530211	0.509402	0.508884	0.521602	0.539949	11
3396	yfgM	b2513	620	0.725953	265.478	365.696	0.271696	0.363242	36.2064	0.549834	0.527428	0.568024	0.483496	0.50909	0.513355	0.487591	0.552825	18
3397	hisS	b2514	1274	0.885752	370.15	417.893	0.249603	0.390447	35.3968	0.500084	0.484835	0.512025	0.356487	0.420582	0.427434	0.40118	0.503225	111
3398	ispG	b2515	1118	0.63359	198.275	312.939	0.266765	0.382352	23.4086	0.54018	0.529607	0.550569	0.466443	0.46553	0.516811	0.470182	0.545261	27
3400	rlmN	b2517	1154	0.796814	275.146	345.308	0.261875	0.385936	37.0782	0.535584	0.544955	0.524202	0.411815	0.418043	0.447295	0.429953	0.544026	150
3401	ndk	b2518	431	2.33645	3186.94	1364.01	0.191365	0.332251	132.266	0.509922	0.512017	0.498482	0.480834	0.511899	0.533272	0.492676	0.507023	149
3406	iscX	b2524	200	0.708264	361.943	511.028	0.213773	0.2922	37.8187	0.48763	0.505418	0.457281	0.360344	0.477999	0.505418	0.436949	0.486179	12
3407	fdx	b2525	335	1.31145	639.221	487.415	0.20509	0.311493	46.0556	0.477668	0.486803	0.464686	0.468557	0.485736	0.480281	0.479786	0.475378	2
3408	hscA	b2526	1850	0.551012	236.385	429.002	0.251319	0.435524	29.2938	0.551873	0.546126	0.557024	0.422119	0.520967	0.541826	0.485885	0.552108	17
3409	hscB	b2527	515	0.415512	161.313	388.228	0.242271	0.363165	31.428	0.501561	0.523889	0.4775	0.504549	0.471337	0.522265	0.464821	0.503346	96
3410	iscA	b2528	323	0.443313	540.299	1218.77	0.209795	0.314737	101.49	0.552911	0.564128	0.536418	0.461302	0.505284	0.527961	0.486038	0.564246	17
3411	iscU	b2529	386	1.81058	1407.5	777.374	0.200654	0.340984	91.8515	0.50433	0.495376	0.510333	0.438008	0.425785	0.491578	0.463339	0.514762	28
3412	iscS	b2530	1214	1.18526	1235.72	1042.58	0.191127	0.359975	89.7612	0.519446	0.501166	0.537745	0.3978	0.441654	0.467214	0.435136	0.520452	112
3413	iscR	b2531	488	1.82455	677.591	371.374	0.232233	0.357295	40.8671	0.519057	0.48473	0.547224	0.375824	0.411359	0.421525	0.384608	0.533318	452
3414	trmJ	b2532	740	1.219	353.492	289.986	0.276813	0.406068	26.339	0.554928	0.560302	0.54825	0.550945	0.478159	0.495084	0.556754	0.554457	3384
3423	glyA	b2551	1253	1.68021	2407.72	1432.98	0.190224	0.360646	96.7949	0.493296	0.494897	0.491207	0.419794	0.427772	0.403118	0.44559	0.494628	1563
3424	glnB	b2553	338	1.5238	473.993	311.059	0.262858	0.361568	19.8673	0.516971	0.519151	0.508903	0.466699	0.427166	0.500856	0.480122	0.536221	61
3434	era	b2566	905	0.687034	254.093	369.84	0.25211	0.354155	34.0514	0.509036	0.528578	0.480038	0.410335	0.542022	0.500765	0.495669	0.506333	-3
3435	rnc	b2567	680	1.05958	348.363	328.774	0.260924	0.354338	32.9232	0.496495	0.454543	0.533563	0.453363	0.409695	0.406598	0.420618	0.504875	272
3436	lepB	b2568	974	0.243006	76.2438	313.752	0.26881	0.389867	31.2243	0.526592	0.527167	0.525334	0.426859	0.499605	0.515942	0.413132	0.526963	16
3437	lepA	b2569	1799	1.14022	528.387	463.409	0.244554	0.373902	38.3006	0.515572	0.519598	0.511314	0.389257	0.405764	0.491942	0.418137	0.518425	198
3440	rseA	b2572	650	0.668668	151.185	226.099	0.280123	0.348277	21.1095	0.522314	0.533494	0.510854	0.418463	0.443107	0.46132	0.431225	0.527465	33
3441	rpoE	b2573	575	0.306067	64.3789	210.342	0.312043	0.383026	18.5128	0.578273	0.619279	0.536602	0.448618	0.507179	0.571016	0.502587	0.586447	2015
3444	yfiD	b2579	383	2.78847	1106.76	396.905	0.225051	0.336162	21.8446	0.504883	0.478722	0.526918	0.478486	0.505082	0.534589	0.505522	0.506891	1042
3445	yfiF	b2581	1037	1.2842	373.063	290.502	0.287215	0.405526	29.1062	0.562821	0.563545	0.555202	0.489576	0.423003	0.525303	0.516241	0.5611	5920
3446	kgtP	b2587	1298	0.735299	375.235	510.316	0.267366	0.33822	52.0276	0.512029	0.496286	0.525374	0.375243	0.412411	0.426592	0.419497	0.515846	5854
3447	clpB	b2592	2573	1.05221	298.802	283.976	0.312896	0.362771	16.8852	0.549712	0.54883	0.548441	0.501651	0.518345	0.548854	0.541396	0.550267	130
3449	rluD	b2594	980	1.47333	236.272	160.366	0.321622	0.378255	16.082	0.525028	0.530605	0.517192	0.377317	0.496306	0.525582	0.446265	0.526686	2937
3452	rplS	b2606	347	1.84086	14887.6	8087.28	0.227084	0.320461	739.918	0.541068	0.527899	0.54999	0.374224	0.47968	0.491406	0.456795	0.558116	42
3453	trmD	b2607	767	0.0166636	139.544	8374.16	0.216225	0.396375	747.341	0.597723	0.59789	0.595308	0.491702	0.542825	0.522926	0.51217	0.600947	31
3454	rimM	b2608	548	0.0539117	523.464	9709.67	0.205145	0.376569	763.618	0.586903	0.606732	0.564005	0.623468	0.61616	0.61849	0.607099	0.575836	19
3455	rpsP	b2609	248	1.4544	13743.6	9449.68	0.1682	0.345645	871.813	0.53585	0.490925	0.556823	0.341278	0.408822	0.441053	0.374453	0.560079	249
3456	ffh	b2610	1361	0.856053	335.795	392.26	0.251597	0.379897	34.6599	0.532095	0.531958	0.531733	0.507586	0.487928	0.504852	0.501644	0.533164	2320
3457	grpE	b2614	593	2.48124	2575.92	1038.16	0.220047	0.329207	95.5443	0.529376	0.496107	0.561776	0.412356	0.402393	0.460564	0.41043	0.545772	3300
3458	yfjF	b2618	290	0.756982	111.573	147.392	0.308419	0.364586	15.41	0.594663	0.667789	0.51758	0.549062	0.655928	0.6578	0.608871	0.578922	-10
3459	yfjG	b2619	476	1.22614	230.73	188.176	0.345861	0.332353	22.5078	0.525708	0.506166	0.53727	0.770677	0.641965	0.49073	0.732285	0.51117	2880
3472	stpA	b2669	404	2.32083	1559.56	671.986	0.255885	0.320668	82.0747	0.493421	0.476882	0.506915	0.448836	0.468188	0.46096	0.440541	0.492644	1155
3474	luxS	b2687	515	1.65234	909.187	550.243	0.223523	0.346796	44.2613	0.574101	0.561201	0.579654	0.428863	0.450148	0.493759	0.4625	0.586988	150
3475	gshA	b2688	1556	0.561206	132.233	235.622	0.284589	0.351844	20.5534	0.526743	0.529395	0.523089	0.532629	0.558462	0.544228	0.548329	0.525133	73
3478	csrA	b2696	185	1.90783	1912.77	1002.59	0.199537	0.299622	101.526	0.441249	0.435374	0.443857	0.372877	0.493937	0.436867	0.428711	0.418425	235
3479	alaS	b2697	2630	0.931712	730.452	783.989	0.22372	0.385274	59.311	0.516359	0.501741	0.523341	0.371612	0.398805	0.488716	0.385437	0.518734	128
3481	recA	b2699	1061	1.58155	721.37	456.117	0.21205	0.377747	42.1957	0.532426	0.583374	0.477978	0.485871	0.519375	0.554658	0.514931	0.52856	80
3499	rpoS	b2741	992	0.49328	199.043	403.509	0.270949	0.369244	29.0966	0.563739	0.547455	0.570519	0.443885	0.395974	0.385278	0.442109	0.573565	63
3500	nlpD	b2742	1139	0.544066	148.688	273.29	0.422401	0.33813	25.5658	0.613555	0.526469	0.539587	0.545346	0.529529	0.542706	0.548507	0.61428	140
3503	truD	b2745	1049	0.452581	104.482	230.857	0.291956	0.382364	18.5892	0.533957	0.526797	0.539168	0.540857	0.620536	0.554912	0.571683	0.528791	-3
3504	ispF	b2746	479	0.532379	142.326	267.339	0.308196	0.386138	16.3222	0.544799	0.568648	0.521592	0.452274	0.498028	0.534267	0.472656	0.549322	0
3505	ispD	b2747	710	0.27284	53.0494	194.434	0.300447	0.386254	15.5492	0.567343	0.595024	0.54073	0.477755	0.582435	0.517238	0.521787	0.564091	19
3506	ftsB	b2748	311	0.160464	50.7704	316.397	0.284647	0.356752	21.4858	0.575141	0.572751	0.566505	0.592053	0.598004	0.574446	0.611788	0.5448	194
3528	eno	b2779	1298	1.89671	4054.85	2137.83	0.183928	0.341317	232.083	0.490092	0.492308	0.486735	0.462919	0.475597	0.467164	0.488789	0.490305	88
3529	pyrG	b2780	1637	1.30732	1021.52	781.386	0.201419	0.366316	86.9521	0.509393	0.510769	0.503206	0.406873	0.412755	0.496678	0.407048	0.512357	228
3559	thyA	b2827	794	0.888299	163.148	183.663	0.291696	0.329421	18.4954	0.496939	0.485442	0.507481	0.390796	0.382943	0.427747	0.399881	0.508887	7
3562	rppH	b2830	530	0.393929	88.098	223.639	0.331281	0.324698	19.3413	0.520462	0.575057	0.462826	0.609783	0.609053	0.612775	0.651032	0.507881	353
3586	lysS	b2890	1517	1.22704	1236.87	1008.01	0.1956	0.352927	81.8024	0.470308	0.469798	0.470204	0.402665	0.367135	0.454895	0.368029	0.474238	1031
3588	prfB	b2891	1022	1.07736	882.427	819.067	0.213023	0.368395	79.3374	0.397023	0.397023	0.491238	0.391675	0.397023	0.397023	0.391675	0.538519	167
3593	ygfY	b2897	266	1.5785	254.181	161.027	0.335791	0.286278	17.2574	0.488048	0.447667	0.518068	0.496	0.44642	0.46563	0.508747	0.498334	1419
3602	pepP	b2908	1325	0.585462	127.587	217.926	0.268568	0.378257	16.7485	0.532102	0.534134	0.524438	0.399098	0.478251	0.531938	0.453511	0.533807	26
3603	ygfB	b2909	578	1.028	301.915	293.692	0.257924	0.327682	21.2495	0.53164	0.517928	0.54079	0.459773	0.404658	0.474362	0.463658	0.548675	1734
3604	serA	b2913	1232	1.89701	726.487	382.965	0.258296	0.360657	31.005	0.521459	0.526284	0.507849	0.323896	0.413012	0.466398	0.39306	0.526399	256
3605	rpiA	b2914	659	1.31102	588.219	448.673	0.235649	0.345751	46.0381	0.503677	0.441428	0.559204	0.501755	0.373093	0.411974	0.489017	0.516093	53
3610	mscS	b2924	860	0.611208	224.434	367.197	0.258462	0.358884	28.5259	0.505748	0.480059	0.522759	0.304386	0.384106	0.451669	0.3504	0.514276	358
3611	fbaA	b2925	1079	1.4804	1843.31	1245.14	0.188151	0.339778	122.47	0.469948	0.4528	0.484412	0.325398	0.374338	0.405313	0.338744	0.474282	215
3612	pgk	b2926	1163	2.13634	1978.32	926.029	0.208449	0.338555	91.4392	0.498742	0.501242	0.49577	0.462912	0.485123	0.480418	0.475392	0.498836	50
3613	epd	b2927	1019	0.302958	67.851	223.961	0.390897	0.376575	19.7333	0.602049	0.557151	0.630526	0.525934	0.510818	0.528844	0.524655	0.604809	285
3620	tktA	b2935	1991	1.57692	1132.27	718.022	0.218593	0.385635	62.1626	0.49501	0.484385	0.50626	0.431493	0.427375	0.469029	0.426089	0.496624	1242
3621	speB	b2937	920	1.81056	895.144	494.401	0.23937	0.37663	44.7733	0.498855	0.505369	0.491794	0.447263	0.455524	0.494545	0.459387	0.50202	138
3622	speA	b2938	1976	0.976821	749.257	767.036	0.221335	0.400369	67.3585	0.507811	0.508473	0.506973	0.526459	0.565186	0.523045	0.523441	0.505881	9
3629	yggL	b2959	326	1.20032	611.09	509.107	0.238705	0.31684	52.4209	0.484738	0.467829	0.49892	0.383476	0.464853	0.462983	0.430198	0.488554	0
3630	trmI	b2960	719	1.02227	296.566	290.105	0.269379	0.388456	32.5275	0.543917	0.529521	0.547232	0.486387	0.517797	0.542335	0.528315	0.543309	4168
3637	yghJ	b4466	4562	0.611971	132.963	217.27	0.29168	0.36877	20.5334	0.519723	0.501013	0.537466	0.3504	0.422671	0.481059	0.436737	0.520885	485
3661	yqhA	b3002	494	0.936447	120.142	128.295	0.277443	0.319453	16.5828	0.53698	0.531838	0.53818	0.644438	0.558296	0.552816	0.652935	0.531518	1347
3668	parC	b3019	2258	0.624692	133.776	214.148	0.294572	0.394522	16.7631	0.560373	0.547177	0.573084	0.464482	0.538297	0.540471	0.475481	0.56079	138
3675	parE	b3030	1892	0.985611	204.951	207.943	0.300757	0.384487	16.8347	0.560598	0.568944	0.55127	0.471329	0.549717	0.595683	0.507912	0.561351	29
3677	cpdA	b3032	827	0.248576	50.5699	203.439	0.286313	0.405054	15.0439	0.554041	0.565291	0.536247	0.458114	0.467887	0.499349	0.434608	0.558001	25
3681	ribB	b3041	653	1.39108	331.381	238.218	0.304582	0.354686	19.4407	0.537871	0.524545	0.536627	0.529395	0.560012	0.573937	0.564894	0.53401	7273
3683	rfaE	b3052	1433	0.896022	208.042	232.184	0.31919	0.390914	18.2863	0.545904	0.538105	0.550307	0.528077	0.410075	0.551575	0.514684	0.545009	48
3701	yhaM	b4470	1310	0.97382	123.959	127.292	0.441942	0.416863	18.3185	0.57842	0.584149	0.572165	0.431762	0.519059	0.468396	0.483936	0.580385	28
3722	deaD	b3162	1889	0.988015	777.626	787.059	0.223359	0.40189	68.5344	0.535337	0.519604	0.551262	0.473172	0.554681	0.524805	0.508706	0.534964	180
3723	nlpI	b3163	884	0.0661645	54.6583	826.098	0.272634	0.376776	71.7158	0.545363	0.547531	0.536153	0.47204	0.415616	0.45094	0.469944	0.546937	109
3724	pnp	b3164	2135	1.21383	1303.08	1073.53	0.207779	0.375171	96.1904	0.509081	0.493505	0.524008	0.338608	0.450246	0.455189	0.39208	0.510874	247
3725	rpsO	b3165	269	1.51373	12388.4	8183.97	0.171218	0.312342	718.304	0.487741	0.494248	0.478151	0.445842	0.484531	0.511382	0.464533	0.483653	149
3726	truB	b3166	944	0.368145	132.158	358.984	0.223085	0.383019	34.4055	0.524738	0.52991	0.516982	0.58585	0.618802	0.621387	0.604311	0.518498	0
3727	rbfA	b3167	401	1.55187	795.956	512.9	0.231827	0.347357	42.8387	0.515678	0.494946	0.532812	0.536252	0.474357	0.476523	0.463576	0.521684	164
3728	infB	b3168	2672	1.0225	1500.22	1467.2	0.194185	0.3721	114.335	0.52629	0.52409	0.52597	0.4833	0.54975	0.578192	0.526918	0.525607	25
3729	nusA	b3169	1487	0.970222	1050.05	1082.28	0.207037	0.366369	89.5796	0.52836	0.502369	0.553836	0.477066	0.470085	0.494343	0.48254	0.530623	28
3732	secG	b3175	332	0.379696	1081.07	2847.2	0.217941	0.32259	328.261	0.539045	0.514011	0.55533	0.478847	0.473805	0.486444	0.496663	0.548715	228
3733	glmM	b3176	1337	1.16737	479.072	410.384	0.230127	0.388422	32.9052	0.511954	0.51503	0.508554	0.360814	0.459428	0.464478	0.420156	0.51278	-7
3737	greA	b3181	476	1.21033	502.233	414.955	0.250664	0.329286	43.0671	0.493898	0.518981	0.464132	0.379643	0.415825	0.497277	0.374388	0.503727	1867
3738	obgE	b3183	1172	0.906242	400.348	441.768	0.256041	0.377073	40.2721	0.536898	0.55327	0.51885	0.366619	0.332918	0.469411	0.375892	0.542866	16
3739	yhbE	b3184	965	0.0521401	18.7922	360.417	0.287532	0.412259	29.4306	0.591925	0.564871	0.599622	0.528755	0.55121	0.566601	0.572236	0.593661	127
3740	rpmA	b3185	257	1.38595	14347.3	10351.9	0.216075	0.327665	844.066	0.486899	0.483931	0.48353	0.434783	0.447613	0.458827	0.447046	0.498217	21
3741	rplU	b3186	311	1.26048	15964.7	12665.5	0.19325	0.340611	1217.59	0.493418	0.421557	0.550978	0.442846	0.414748	0.426448	0.429426	0.50895	1784
3742	murA	b3189	1259	0.81562	336.474	412.537	0.236605	0.378125	35.0203	0.51267	0.50785	0.516711	0.415113	0.457886	0.47694	0.42787	0.515235	55
3743	yrbA	b3190	254	2.12595	558.286	262.606	0.247544	0.336024	29.2756	0.483888	0.461664	0.495374	0.479886	0.422117	0.451311	0.473954	0.504369	160
3760	sspB	b3228	497	0.252609	243.662	964.583	0.20917	0.390563	68.3996	0.528563	0.542213	0.508232	0.454232	0.386721	0.493498	0.457453	0.544924	6
3761	sspA	b3229	638	0.955615	880.022	920.896	0.194457	0.371113	81.9951	0.497128	0.465756	0.5276	0.408895	0.500046	0.465897	0.442509	0.496233	395
3762	rpsI	b3230	392	1.22408	19319.9	15783.3	0.171155	0.333444	1236.75	0.472327	0.498942	0.438918	0.402393	0.409769	0.446226	0.414747	0.476051	16
3763	rplM	b3231	428	1.28297	16227.6	12648.5	0.188075	0.323855	1246.44	0.535732	0.538526	0.527758	0.435377	0.467323	0.503863	0.446957	0.545091	219
3765	mdh	b3236	938	1.33201	702.469	527.374	0.220928	0.367058	47.6744	0.518568	0.54144	0.49242	0.462138	0.59021	0.546483	0.515318	0.513492	1589
3775	mreC	b3250	1103	0.212563	63.9598	300.897	0.271398	0.40553	21.9451	0.551831	0.528563	0.572047	0.426893	0.495817	0.595345	0.480597	0.550114	66
3776	mreB	b3251	1043	1.42283	885.615	622.434	0.224849	0.382272	63.8895	0.516072	0.522455	0.50879	0.450155	0.432491	0.452687	0.439495	0.519236	305
3780	aroE	b3281	818	0.472142	87.4764	185.276	0.3403	0.348056	16.3688	0.520564	0.526561	0.512073	0.405316	0.420379	0.45369	0.406843	0.52571	5
3781	rimN	b3282	572	1.04364	249.028	238.614	0.316743	0.360437	17.14	0.507572	0.490259	0.52541	0.533144	0.510548	0.487701	0.517095	0.505594	5
3783	smg	b3284	473	0.121959	25.4388	208.585	0.304531	0.310444	15.4009	0.531722	0.518101	0.542358	0.577354	0.524837	0.504712	0.573451	0.531941	-28
3788	rplQ	b3294	383	0.858176	15536.4	18104	0.166723	0.383264	1297.76	0.528604	0.487727	0.564173	0.359144	0.437177	0.439182	0.405255	0.547431	41
3789	rpoA	b3295	989	0.200964	3797	18894	0.202937	0.374297	1540.61	0.55372	0.558229	0.54917	0.465783	0.483292	0.555368	0.436513	0.556711	26
3790	rpsD	b3296	620	0.648855	12156.3	18735.1	0.200891	0.3585	1689.19	0.516388	0.494336	0.53739	0.456358	0.51171	0.517285	0.490504	0.514942	34
3791	rpsK	b3297	389	0.459831	8020.37	17442	0.207296	0.336221	1534.71	0.577156	0.562448	0.587633	0.474251	0.515409	0.541329	0.496017	0.58688	17
3792	rpsM	b3298	356	0.661712	11578.8	17498.2	0.1909	0.359522	1639.06	0.596155	0.572355	0.616069	0.445664	0.541498	0.581751	0.490435	0.604771	147
3794	secY	b3300	1331	0.0379929	506.527	13332.2	0.235293	0.385823	1069.52	0.571457	0.604444	0.524011	0.478875	0.530032	0.592368	0.490358	0.570347	8
3795	rplO	b3301	434	0.598311	9738.24	16276.2	0.166836	0.362903	1415.13	0.528209	0.592831	0.466002	0.512384	0.54279	0.604101	0.525882	0.516573	4
3796	rpmD	b3302	179	0.785346	12982.9	16531.5	0.206263	0.323743	1341.52	0.535684	0.521004	0.545012	0.400502	0.481139	0.518744	0.469278	0.568165	4
3797	rpsE	b3303	503	0.655981	9323.73	14213.4	0.206856	0.352107	1310.19	0.527422	0.543459	0.506534	0.429346	0.489535	0.544129	0.473837	0.531949	15
3798	rplR	b3304	353	0.823301	10703.5	13000.8	0.183595	0.353088	1364.79	0.500215	0.51195	0.475254	0.49357	0.460151	0.478483	0.499983	0.499678	10
3799	rplF	b3305	533	0.768961	13355.9	17368.8	0.195065	0.365403	1325.12	0.537315	0.495048	0.576109	0.583556	0.620436	0.53493	0.569892	0.524654	13
3800	rpsH	b3306	392	0.74071	9383.05	12667.6	0.223428	0.347908	1241.15	0.51555	0.479448	0.553888	0.421967	0.509931	0.523781	0.461903	0.510404	34
3801	rpsN	b3307	305	0.723981	10324.9	14261.3	0.189397	0.361443	1234.1	0.541678	0.49054	0.591396	0.449557	0.41461	0.422473	0.433847	0.567746	15
3802	rplE	b3308	539	0.470216	7678.56	16329.8	0.202571	0.336512	1508.57	0.544433	0.502179	0.59191	0.366962	0.35028	0.441879	0.379034	0.565004	15
3803	rplX	b3309	314	0.516317	8456.15	16377.8	0.174829	0.324459	1694.02	0.553542	0.548572	0.553176	0.565759	0.512591	0.533635	0.51922	0.555487	11
3804	rplN	b3310	371	0.454672	7948.86	17482.6	0.20994	0.369245	1694.69	0.582223	0.600534	0.557829	0.490014	0.546759	0.582063	0.506674	0.589415	165
3805	rpsQ	b3311	254	0.839225	14251.7	16982	0.193232	0.34185	1159.04	0.508208	0.513408	0.499756	0.408574	0.512507	0.532215	0.490255	0.501737	0
3806	rpmC	b3312	191	0.485999	8793.6	18093.9	0.176368	0.338796	1241.12	0.486253	0.499272	0.453713	0.381179	0.431393	0.483114	0.427317	0.486531	0
3807	rplP	b3313	410	0.761876	11511	15108.7	0.173457	0.355024	1269.57	0.525288	0.529215	0.513909	0.43707	0.452209	0.524366	0.471116	0.539712	13
3808	rpsC	b3314	701	0.712948	11275.7	15815.5	0.18749	0.370913	1306.49	0.541137	0.517257	0.561216	0.395211	0.393191	0.467711	0.387262	0.552586	18
3809	rplV	b3315	332	0.61686	10412	16879.1	0.17672	0.31503	1321.59	0.56545	0.546186	0.578431	0.437079	0.429411	0.5395	0.427138	0.588373	15
3810	rpsS	b3316	278	0.778274	12241.8	15729.4	0.190213	0.311439	1465.04	0.512538	0.520345	0.502639	0.491856	0.469101	0.50242	0.456169	0.516605	17
3811	rplB	b3317	821	0.853875	11836.7	13862.3	0.18675	0.378063	1239.63	0.558638	0.523064	0.592451	0.466989	0.522576	0.517032	0.490723	0.560462	18
3812	rplW	b3318	302	0.584874	8915.95	15244.2	0.188459	0.308477	1346.68	0.500496	0.504954	0.494909	0.477928	0.509716	0.502626	0.494216	0.497292	-3
3813	rplD	b3319	605	0.655671	10921.1	16656.3	0.159984	0.34795	1398.33	0.548189	0.550971	0.543697	0.476183	0.598199	0.612468	0.561754	0.542816	11
3814	rplC	b3320	629	0.73237	11630	15880	0.201108	0.356884	1398.95	0.528911	0.552339	0.505583	0.599634	0.580923	0.558742	0.637694	0.515775	33
3815	rpsJ	b3321	311	0.751105	13810.4	18386.8	0.164714	0.34045	1314.38	0.513037	0.45507	0.566671	0.436844	0.479069	0.455751	0.477994	0.520524	238
3821	tufA	b3339	1184	1.38703	13937	10048.1	0.276048	0.357492	818.562	0.537373	0.549308	0.505713	0.34468	0.407878	0.481594	0.399403	0.53738	71
3822	fusA	b3340	2114	0.472573	6340.75	13417.5	0.17786	0.36982	1235.25	0.528689	0.529023	0.52818	0.415779	0.490977	0.475705	0.428748	0.528922	28
3823	rpsG	b3341	539	1.37267	12148.1	8849.98	0.17983	0.347217	1002.99	0.563595	0.552546	0.569353	0.459105	0.471559	0.495398	0.456178	0.571202	97
3824	rpsL	b3342	374	1.05875	12181.8	11505.8	0.185892	0.363449	1082.89	0.54094	0.519718	0.560888	0.409273	0.472066	0.510699	0.437648	0.554592	126
3829	fkpA	b3347	812	1.60282	882.228	550.424	0.211946	0.325394	57.977	0.497512	0.491884	0.501267	0.414601	0.437835	0.428828	0.444036	0.501278	488
3830	slyD	b3349	590	1.05166	2080.16	1977.98	0.204062	0.387305	169.898	0.527462	0.515206	0.536074	0.596524	0.490099	0.506863	0.559109	0.529454	95
3839	ppiA	b3363	572	1.79602	307.979	171.479	0.268083	0.319703	18.8748	0.503073	0.526905	0.474437	0.56271	0.558083	0.49814	0.542642	0.496893	12638
3848	trpS	b3384	1004	1.10889	543.344	489.99	0.253986	0.367301	39.4215	0.512078	0.509574	0.513996	0.48944	0.465353	0.476167	0.459436	0.514657	-7
3849	gph	b3385	758	0.524105	117.3	223.81	0.311111	0.379169	20.7709	0.534143	0.563471	0.509019	0.430416	0.453672	0.512978	0.43783	0.537515	-7
3850	rpe	b3386	677	1.09053	223.507	204.952	0.287459	0.352363	18.6373	0.54798	0.541626	0.55166	0.387381	0.38946	0.466669	0.411976	0.558079	18
3852	damX	b3388	1286	0.570064	315.075	552.7	0.222415	0.364759	45.0326	0.521483	0.544937	0.496717	0.385761	0.507552	0.542535	0.494579	0.522433	92
3853	aroB	b3389	1088	0.142633	87.9767	616.804	0.271508	0.401388	48.4174	0.558509	0.553322	0.553589	0.494762	0.487154	0.49907	0.479821	0.556284	57
3854	aroK	b3390	521	1.00479	1157.12	1151.6	0.232085	0.330518	103.215	0.564854	0.570013	0.543641	0.520073	0.529092	0.558704	0.518241	0.563459	401
3878	asd	b3433	1103	1.49504	694.134	464.29	0.254026	0.395068	29.7365	0.569577	0.563704	0.574515	0.430773	0.569973	0.627668	0.531761	0.568745	843
3896	rpoH	b3461	854	0.67027	353.212	526.97	0.25232	0.391956	33.983	0.560925	0.556449	0.55887	0.410535	0.538835	0.558801	0.502025	0.563069	245
3898	ftsE	b3463	668	0.376306	91.048	241.952	0.328342	0.408817	18.6135	0.530927	0.542498	0.5139	0.482847	0.431323	0.472518	0.470085	0.537823	3
3899	ftsY	b3464	1493	0.917516	193.662	211.072	0.350546	0.365345	20.9187	0.535592	0.511908	0.553808	0.427659	0.404438	0.453456	0.415154	0.53932	1008
3944	yiaF	b3554	710	1.0002	431.821	431.733	0.22644	0.345507	43.5742	0.457187	0.494019	0.424092	0.482912	0.549964	0.533027	0.468605	0.447867	1401
3947	glyS	b3559	2069	0.96468	1068.43	1107.55	0.213611	0.399348	72.5147	0.536178	0.52428	0.545785	0.343975	0.368663	0.447876	0.354118	0.541342	10
3948	glyQ	b3560	911	0.963121	941.565	977.618	0.218664	0.386641	69.5442	0.534406	0.517302	0.545025	0.547044	0.47627	0.508016	0.519271	0.536731	95
3970	gpsA	b3608	1019	0.280555	103.675	369.535	0.28825	0.408822	30.3202	0.57377	0.575525	0.569892	0.490599	0.584961	0.625691	0.569792	0.559921	0
3971	secB	b3609	467	2.11243	1983.52	938.975	0.185512	0.328758	81.4749	0.484082	0.468178	0.498388	0.385853	0.424351	0.418623	0.403837	0.493021	63
3972	grxC	b3610	251	0.889901	596.027	669.767	0.212969	0.313865	65.545	0.512586	0.522962	0.487183	0.438639	0.526707	0.529045	0.478665	0.506516	142
3973	yibN	b3611	431	0.872079	612.932	702.84	0.229515	0.366009	67.4453	0.500175	0.487086	0.505016	0.443528	0.417118	0.455439	0.465011	0.509665	4032
3975	tdh	b3616	1025	0.88225	267.363	303.047	0.263203	0.366302	26.7791	0.53063	0.533185	0.527451	0.430646	0.463212	0.530725	0.476014	0.534387	10
3976	kbl	b3617	1196	0.87093	247.408	284.074	0.278686	0.375711	24.1457	0.51167	0.511817	0.509352	0.53547	0.453379	0.429545	0.52422	0.514499	275
3989	rpmG	b3636	167	0.891259	7654.82	8588.78	0.210952	0.24515	1022.87	0.464363	0.429417	0.489926	0.394834	0.461349	0.456545	0.421683	0.463199	21
3990	rpmB	b3637	236	1.58279	19067.1	12046.5	0.199491	0.346059	933.527	0.521844	0.545213	0.489354	0.434295	0.499277	0.530147	0.459376	0.525561	217
3993	rph	b3643	686	1.39588	387.394	277.527	0.239929	0.386691	31.0974	0.534523	0.542607	0.524961	0.537387	0.511293	0.503689	0.519475	0.534442	2939
4027	gyrB	b3699	2414	1.20314	496.775	412.9	0.24983	0.391616	36.7283	0.523148	0.517501	0.527556	0.448233	0.492464	0.468783	0.470649	0.523379	29
4029	dnaN	b3701	1100	0.615165	173.989	282.833	0.284227	0.394164	22.5042	0.53867	0.543736	0.532079	0.558972	0.561286	0.57409	0.557383	0.533082	5
4030	dnaA	b3702	1403	0.361721	104.651	289.314	0.292699	0.37779	23.4476	0.512674	0.502997	0.521234	0.467416	0.521637	0.478069	0.534216	0.512021	11543
4043	glmS	b3729	1829	0.996847	614.796	616.741	0.223509	0.373554	56.6167	0.522289	0.529452	0.509973	0.435583	0.527657	0.551091	0.461984	0.520367	162
4044	glmU	b3730	1370	0.637746	387.116	607.006	0.238008	0.366635	48.3967	0.513835	0.517538	0.50014	0.603617	0.53125	0.544892	0.596324	0.511123	353
4045	atpC	b3731	419	0.290386	1093.48	3765.6	0.197693	0.38969	259.513	0.573565	0.565582	0.561309	0.557479	0.576141	0.543681	0.576945	0.566856	21
4046	atpD	b3732	1382	0.684969	2296.39	3352.55	0.182922	0.384653	243.731	0.511206	0.51907	0.498982	0.406198	0.524855	0.584458	0.482515	0.510439	27
4047	atpG	b3733	863	0.324838	865.096	2663.16	0.186469	0.394403	216.489	0.540022	0.54001	0.534058	0.3396	0.324554	0.391455	0.32928	0.556916	51
4048	atpA	b3734	1541	0.752104	2750.31	3656.82	0.189307	0.380785	305.394	0.544663	0.5338	0.554393	0.386681	0.387779	0.442618	0.389981	0.551555	13
4049	atpH	b3735	533	0.190202	736.299	3871.14	0.193806	0.385535	330.692	0.545495	0.569748	0.502893	0.505955	0.571771	0.563035	0.543053	0.541091	15
4050	atpF	b3736	470	0.228245	1173.6	5141.84	0.181447	0.358128	456.016	0.575025	0.600587	0.541284	0.50676	0.543652	0.606446	0.524828	0.575679	62
4051	atpE	b3737	239	1.79639	7167.81	3990.13	0.166157	0.365063	357.224	0.530341	0.596919	0.438258	0.485587	0.556928	0.594778	0.504699	0.486114	47
4052	atpB	b3738	815	0.426339	747.934	1754.32	0.251835	0.357104	171.803	0.571959	0.558059	0.578338	0.477445	0.537593	0.553343	0.500927	0.573985	9
4053	atpI	b3739	380	0.0189398	11.9586	631.404	0.332637	0.387553	65.4957	0.529378	0.540854	0.480369	0.492474	0.499469	0.518034	0.505347	0.532433	617
4055	mnmG	b3741	1889	0.915781	280.754	306.573	0.284423	0.373658	27.7145	0.544231	0.536965	0.540006	0.531619	0.565083	0.575693	0.567928	0.543413	379
4056	mioC	b3742	443	0.783819	248.097	316.524	0.273831	0.315643	32.7585	0.512722	0.550228	0.462477	0.641051	0.52498	0.541823	0.582869	0.509983	90
4065	ppiC	b3775	281	2.78728	559.486	200.728	0.269625	0.320712	26.0913	0.439676	0.427035	0.449795	0.492701	0.382304	0.402315	0.476107	0.451764	438
4069	rhlB	b3780	1265	0.998174	352.85	353.496	0.275157	0.368	23.877	0.528467	0.5719	0.481557	0.604467	0.498454	0.521653	0.595122	0.529925	18722
4075	cyaY	b3807	320	1.88426	416.131	220.846	0.291802	0.332062	18.512	0.501066	0.516123	0.478994	0.546452	0.476307	0.45792	0.542596	0.506676	6233
4090	yihA	b3865	632	1.31143	323.36	246.57	0.291548	0.366503	24.4146	0.563587	0.542996	0.569419	0.582184	0.55671	0.574768	0.626215	0.565115	3104
4102	fdhE	b3891	929	0.961214	135.902	141.386	0.30553	0.375307	17.2544	0.556474	0.570171	0.541872	0.373415	0.461985	0.539551	0.421262	0.561303	-3
4116	cpxR	b3912	698	1.27357	260.511	204.551	0.309774	0.335702	15.1106	0.519007	0.515364	0.521197	0.502955	0.456461	0.481858	0.533854	0.519085	5070
4117	tpiA	b3919	767	1.6528	862.789	522.017	0.220368	0.362464	53.8808	0.486618	0.505051	0.467522	0.350053	0.402366	0.422005	0.387901	0.493243	108
4123	rraA	b3929	485	0.564533	232.398	411.663	0.272715	0.381237	31.4386	0.571001	0.550416	0.586789	0.5464	0.463995	0.55124	0.53353	0.585763	93
4125	hslU	b3931	1331	1.41854	805.2	567.625	0.210726	0.369624	39.669	0.521701	0.549507	0.489887	0.395613	0.46859	0.477197	0.434765	0.524362	10
4126	hslV	b3932	530	0.966873	526.987	545.042	0.224765	0.35183	34.7944	0.518585	0.504578	0.529401	0.466992	0.479357	0.478051	0.471184	0.522057	93
4127	ftsN	b3933	959	0.459973	84.6297	183.988	0.266935	0.384056	15.329	0.536685	0.527836	0.541249	0.499052	0.535113	0.575424	0.506717	0.536569	92
4131	metJ	b3938	317	1.74537	1146.84	657.078	0.240446	0.327823	65.559	0.493514	0.463799	0.522341	0.36992	0.37915	0.41161	0.365225	0.51384	8645
4141	trmA	b3965	1100	1.15225	182.089	158.029	0.317306	0.3522	15.8824	0.554641	0.561465	0.541275	0.598589	0.522733	0.527125	0.587235	0.556255	10806
4164	plsB	b4041	2423	0.712228	143.508	201.492	0.282577	0.388679	15.5071	0.537482	0.525791	0.53981	0.465034	0.388252	0.472415	0.442576	0.539585	3022
4240	rsgA	b4161	1052	0.722843	145.256	200.951	0.291295	0.378175	16.7634	0.558303	0.542187	0.560672	0.542035	0.509618	0.465071	0.54394	0.562514	1419
4256	ppa	b4226	530	1.85231	4716.77	2546.43	0.178914	0.301057	254.417	0.473481	0.447857	0.490339	0.385991	0.4252	0.435104	0.399549	0.478202	4959
4257	fbp	b4232	998	1.42594	391.161	274.318	0.238276	0.363267	30.8751	0.522452	0.530686	0.502052	0.460098	0.461905	0.5056	0.470843	0.525359	1705
4258	yjgA	b4234	551	0.607163	245.857	404.928	0.233711	0.342178	37.3621	0.525038	0.513968	0.528848	0.653144	0.553785	0.484968	0.60644	0.518399	2035
4264	yjgF	b4243	386	2.29641	1554.75	677.035	0.185341	0.316373	47.4902	0.451035	0.443891	0.457404	0.438189	0.403586	0.454142	0.448114	0.449888	73
4272	valS	b4258	2855	1.18544	691.45	583.288	0.219365	0.386571	41.8482	0.512496	0.502763	0.522183	0.387815	0.342174	0.364137	0.373312	0.516321	0
4273	holC	b4259	443	0.189486	41.9599	221.441	0.390659	0.404808	15.3092	0.62126	0.650596	0.58762	0.63025	0.662857	0.636646	0.662138	0.611213	160
4274	pepA	b4260	1511	0.785581	273.74	348.456	0.267865	0.406585	22.7362	0.55512	0.542721	0.563517	0.392483	0.454862	0.506091	0.441585	0.557416	2610
4335	yjiY	b4354	2150	0.445072	292.409	656.992	0.213939	0.397107	54.5662	0.502965	0.514037	0.492261	0.381979	0.354008	0.359993	0.386087	0.507162	2082
4350	yjjK	b4391	1667	1.25256	623.732	497.967	0.221718	0.386155	45.5604	0.530299	0.545349	0.512074	0.393744	0.473036	0.43263	0.458971	0.531142	2711
4352	rob	b4396	869	0.813418	148.37	182.403	0.29369	0.362854	16.4976	0.503408	0.478645	0.525438	0.436519	0.412668	0.453233	0.450629	0.509484	4280
4353	arcA	b4401	716	0.976942	548.289	561.23	0.23319	0.342025	50.9534	0.510747	0.486237	0.532013	0.372519	0.41065	0.441504	0.402608	0.519228	NA
