# Supplementary material for: Operon mRNAs are organized into ORF-centric structures that predict translation efficiency
Source: eLife journal article supplement (doi:10.7554/elife.22037), 2017-01-31
Supplement: supp [file elife-22037-supp-v1.zip › elife_poa_e22037_Supplementary_File_3.xlsx]

## Sheet: Sheet1
Supplementary File 3: In vivo untranslated (Ksg-treated) data summary (N = 480)
ID	ID number set by authors indicating gene location on chromosome
Gene	Gene name
bNums	b number
Length	ORF length from the first base of start codon to the last base of stop codon
TE	Translation efficiency of the ORF (average ribosome density/mRNA abundance) in WT cells
Ribosome	Average ribosome density of the ORF (see materials and methods for definition) in WT cells
mRNA	mRNA abundance of the ORF (see materials and methods for definition) in WT cells
Gini_mRNA	Gini calculated from WT mRNA-seq signals of the ORF (to eliminate ORFs with intragenic promoters)
-ΔG/nt	- mRNA free energy per nucleotide calculated from ViennaRNA
Mean_DMS_ksg	Mean of ksg-treated DMS-seq signals of the ORF
Gini_ksg	Gini of the full-length ORF calculated from ksg-treated in vivo DMS-seq
Gini_ksg_1	Gini of the first half of the ORF calculated from ksg-treated in vivo DMS-seq
Gini_ksg_2	Gini of the second half of the ORF calculated from ksg-treated in vivo DMS-seq
Gini_ksg_-20:40	Gini calculated from ksg-treated in vivo DMS-seq signals in the region from 20nt upstream to 40nt downstream of ORF start codon
Gini_ksg_0:60	Gini calculated from ksg-treated in vivo DMS-seq signals in the region from the first base of start codon to 60nt downstream
Gini_ksg_0:100	Gini calculated from ksg-treated in vivo DMS-seq signals in the region from the first base of start codon to 100nt downstream
Gini_ksg_head	Gini calculated from ksg-treated in vivo DMS-seq signals in the region from the 20nt upstream to 60nt downstream of start codon
Gini_ksg_body	Gini calculated from ksg-treated in vivo DMS-seq signals in the region from 60nt downstream of start codon to the stop codon of ORF
ORF_distance	Distance (nt) between the first base of start codon and the last base of the upstream stop codon
ORF selection criteria for ksg-treated in vivo dataset:
1. Mean_DMS_ksg ≥ 15
2. Length ≥ 150
3. Gini_mRNA < 0.45 (to select genes with relatively constant mRNA level across ORFs, i.e. without internal promoters or terminators)
ID	Gene	bNums	Length	TE	Ribosome	mRNA	Gini_mRNA	-ΔG/nt	Mean_DMS_ksg	Gini_ksg	Gini_ksg_1	Gini_ksg_2	Gini_ksg_-20:40	Gini_ksg_0:60	Gini_ksg_0:100	Gini_ksg_head	Gini_ksg_body	ORF_distance
6	talB	b0008	953	2.53224	1397.74	551.98	0.186955	0.361658	18.2219	0.409751	0.388089	0.42896	0.274087	0.305742	0.328199	0.279523	0.413963	2708
7	mog	b0009	587	1.52839	212.46	139.009	0.315749	0.369404	15.7419	0.443663	0.466761	0.416586	0.424825	0.494533	0.460545	0.48261	0.43487	115
8	dnaK	b0014	1916	1.86346	4612.68	2475.33	0.18917	0.345945	30.8082	0.462868	0.47807	0.443048	0.417019	0.390508	0.412712	0.409337	0.461514	2270
14	ribF	b0025	941	0.327865	82.1628	250.6	0.266853	0.387226	26.4254	0.478544	0.416362	0.524595	0.533312	0.449994	0.438953	0.503028	0.476657	8
15	ileS	b0026	2816	1.09723	581.498	529.969	0.236226	0.405653	23.1808	0.487087	0.471785	0.468158	0.282539	0.379508	0.385251	0.333016	0.483821	43
16	lspA	b0027	494	0.185374	94.3168	508.793	0.243507	0.41251	19.6366	0.441443	0.455682	0.418494	0.343943	0.405918	0.478348	0.374412	0.435222	0
43	mraZ	b0081	458	0.0935944	35.0411	374.393	0.272041	0.350087	59.324	0.531968	0.535731	0.524121	0.425914	0.487103	0.501921	0.47672	0.539148	602
45	ftsL	b0083	365	0.274571	66.0096	240.41	0.382244	0.367205	17.5565	0.564024	0.57015	0.457614	0.46767	0.52718	0.545963	0.507135	0.539388	-3
54	ddlB	b0092	920	0.670499	120.624	179.902	0.29888	0.386141	15.7744	0.496373	0.492093	0.480976	0.536016	0.526941	0.507553	0.508824	0.493307	-7
55	ftsQ	b0093	830	0.169948	33.3552	196.267	0.317836	0.384988	16.8814	0.498436	0.49134	0.503378	0.360617	0.44101	0.478051	0.427622	0.504042	2
56	ftsA	b0094	1262	0.509704	158.766	311.487	0.319452	0.384842	20.4217	0.494177	0.495683	0.482819	0.365515	0.346756	0.399121	0.397191	0.500705	-3
57	ftsZ	b0095	1151	1.00171	630.035	628.962	0.239189	0.386273	44.0722	0.457628	0.443877	0.453079	0.364851	0.452704	0.476926	0.400173	0.455117	61
58	lpxC	b0096	917	0.449183	585.618	1303.74	0.227042	0.371134	312.318	0.44748	0.426558	0.468195	0.436352	0.468416	0.462031	0.459622	0.442315	101
65	pdhR	b0113	764	0.413539	230.636	557.712	0.269866	0.374306	53.7823	0.568384	0.528708	0.474752	0.363263	0.414527	0.443693	0.377703	0.562465	1957
66	aceE	b0114	2663	1.10876	4408.44	3976	0.186644	0.365772	91.1105	0.422327	0.430824	0.396685	0.250678	0.300095	0.325601	0.275218	0.422916	161
67	aceF	b0115	1892	1.12971	3889.68	3443.07	0.204498	0.405338	119.653	0.493039	0.540953	0.416112	0.344712	0.410273	0.547612	0.39836	0.494383	15
68	lpd	b0116	1424	1.1803	3410.31	2889.37	0.212214	0.362444	135.97	0.414757	0.402095	0.417621	0.33115	0.2702	0.325649	0.316279	0.410938	325
69	acnB	b0118	2597	1.14278	690.914	604.592	0.221286	0.390697	26.9451	0.430851	0.415128	0.43951	0.33027	0.312197	0.33657	0.341	0.427208	2279
70	yacL	b0119	362	0.943031	141.691	150.251	0.371495	0.34011	16.2583	0.451307	0.420594	0.475504	0.338254	0.439503	0.375548	0.372785	0.452968	176
72	hpt	b0125	536	1.42947	678.866	474.906	0.246503	0.349328	18.2367	0.399416	0.416739	0.378896	0.309394	0.402633	0.40072	0.362756	0.399958	2798
85	erpA	b0156	344	1.58121	1152.89	729.115	0.213936	0.300145	64.7397	0.404596	0.392453	0.413471	0.349548	0.373177	0.375806	0.356054	0.409799	82
87	degP	b0161	1424	2.32849	236.391	101.521	0.329337	0.381053	24.924	0.416957	0.407736	0.42391	0.300877	0.257895	0.334702	0.296661	0.422063	130
89	rpsB	b0169	725	1.4015	11884.2	8479.64	0.171052	0.338772	807.816	0.464474	0.472244	0.452481	0.416232	0.444258	0.446739	0.405466	0.463984	6254
90	tsf	b0170	851	1.98158	9456.35	4772.14	0.192278	0.357544	254.125	0.430903	0.425564	0.435325	0.33785	0.414572	0.407993	0.375031	0.431083	258
91	pyrH	b0171	725	0.842856	474.738	563.249	0.222984	0.367062	21.4756	0.460359	0.482704	0.439197	0.455413	0.475427	0.447723	0.45212	0.457942	147
92	frr	b0172	557	1.25575	2257.84	1798.01	0.175653	0.336948	99.8845	0.467486	0.433776	0.496845	0.286741	0.354693	0.376006	0.315475	0.470474	292
94	ispU	b0174	761	0.314403	102.75	326.811	0.288292	0.360263	36.6243	0.44988	0.440073	0.456859	0.368259	0.485199	0.473418	0.439041	0.445	186
95	cdsA	b0175	857	0.206064	47.7656	231.8	0.295718	0.372964	26.1848	0.426813	0.434578	0.418584	0.361556	0.429056	0.477376	0.418732	0.425969	13
96	rseP	b0176	1352	0.144368	36.6954	254.179	0.361053	0.382944	57.3938	0.556069	0.572418	0.484187	0.489635	0.55634	0.510921	0.526674	0.551836	12
97	bamA	b0177	2432	0.856574	396.135	462.464	0.25017	0.371209	47.0308	0.481292	0.471596	0.464768	0.325241	0.412022	0.520751	0.359001	0.481527	30
98	skp	b0178	485	1.50561	1987.37	1319.98	0.214214	0.358247	116.917	0.454931	0.457442	0.450288	0.40816	0.410534	0.394279	0.426718	0.457583	122
99	lpxD	b0179	1025	0.367283	378.136	1029.55	0.23648	0.379337	60.5251	0.488361	0.484185	0.459153	0.320914	0.3931	0.517691	0.344318	0.48774	4
100	fabZ	b0180	455	1.52714	1413.13	925.344	0.209578	0.340286	73.9531	0.428232	0.405651	0.449114	0.293605	0.393091	0.387922	0.382799	0.433329	105
101	lpxA	b0181	788	0.185177	229.727	1240.58	0.202747	0.398858	57.6495	0.491602	0.466343	0.505	0.461729	0.494514	0.449023	0.45523	0.48974	4
105	accA	b0185	959	0.917376	739.232	805.812	0.217046	0.360574	28.9161	0.422316	0.395374	0.448417	0.267987	0.29545	0.39667	0.268007	0.429495	13
121	lpcA	b0222	578	1.16129	345.431	297.454	0.290031	0.348028	15.8324	0.42784	0.395904	0.456706	0.30534	0.314792	0.337534	0.323638	0.439629	2727
132	gpt	b0238	458	4.0032	1171.35	292.602	0.216887	0.341223	19.8368	0.392466	0.382069	0.383435	0.322354	0.284055	0.321942	0.320627	0.39352	1772
134	crl	b0240	401	4.85432	974.835	200.818	0.224323	0.339676	49.1425	0.427682	0.425584	0.427444	0.376819	0.274673	0.344477	0.386556	0.445563	58
216	tgt	b0406	1127	0.9195	645.403	701.906	0.260208	0.360453	23.3379	0.465762	0.427936	0.465734	0.41653	0.384987	0.399489	0.415754	0.469663	56
217	yajC	b0407	332	1.98475	2518.16	1268.76	0.229588	0.32494	50.1221	0.478811	0.472577	0.483462	0.267404	0.450511	0.469686	0.405533	0.480724	23
219	secF	b0409	971	0.281891	162.286	575.703	0.234317	0.379269	18.2006	0.505556	0.511097	0.481608	0.359757	0.377084	0.422834	0.394591	0.508456	11
223	ribE	b0415	470	1.48997	692.981	465.096	0.278753	0.350787	27.1111	0.47128	0.416745	0.433751	0.399541	0.413354	0.385979	0.43785	0.474063	89
224	nusB	b0416	419	0.816379	495.85	607.377	0.20884	0.377446	25.1256	0.486276	0.425159	0.505013	0.329804	0.357248	0.373013	0.336529	0.502723	20
228	yajQ	b0426	491	1.70498	1276.4	748.633	0.221586	0.340978	83.9654	0.455466	0.45122	0.458525	0.489148	0.430314	0.421134	0.480041	0.456904	1686
229	bolA	b0435	317	1.12474	129.7	115.315	0.358219	0.325962	32.0521	0.426467	0.407335	0.436898	0.387439	0.452362	0.41554	0.459685	0.416728	9298
230	tig	b0436	1298	1.85355	6246.28	3369.9	0.197738	0.350385	220.658	0.439854	0.453964	0.426112	0.355708	0.377852	0.410614	0.373309	0.441672	344
231	clpP	b0437	623	1.18638	615.161	518.519	0.227315	0.349117	39.4781	0.406792	0.425592	0.380683	0.299275	0.370365	0.362994	0.344384	0.404358	246
232	clpX	b0438	1274	0.63586	528.954	831.871	0.217794	0.379631	54.2956	0.463905	0.461178	0.466272	0.286294	0.384019	0.436334	0.360177	0.467605	126
233	lon	b0439	2354	0.730581	548.193	750.352	0.236456	0.377889	15.908	0.461863	0.485819	0.435471	0.314178	0.314135	0.411807	0.31977	0.464983	188
234	hupB	b0440	272	2.26118	6902.14	3052.45	0.193428	0.301029	261.461	0.415114	0.392796	0.400451	0.308726	0.274086	0.335789	0.353029	0.450284	209
235	ppiD	b0441	1871	0.625811	206.344	329.723	0.253781	0.354874	17.8035	0.454396	0.447778	0.440124	0.348774	0.34816	0.41762	0.328324	0.454255	192
249	apt	b0469	551	1.91329	1150.43	601.284	0.200241	0.364682	19.7222	0.417917	0.403177	0.427976	0.309644	0.317337	0.312978	0.301564	0.431928	153
251	ybaB	b0471	329	2.18389	1685.64	771.852	0.206122	0.307903	25	0.411441	0.357957	0.410924	0.33167	0.367354	0.344231	0.362243	0.411947	53
252	recR	b0472	605	0.12716	85.5375	672.677	0.220322	0.434017	16.408	0.486529	0.47382	0.498333	0.332715	0.420258	0.491792	0.39759	0.492048	0
254	adk	b0474	644	2.7325	2098.77	768.077	0.218391	0.334224	25.3691	0.439087	0.435706	0.41582	0.323464	0.414897	0.381889	0.389279	0.439811	181
285	cysS	b0526	1385	1.14279	337.229	295.092	0.258478	0.368989	18.0568	0.473232	0.441191	0.471338	0.284826	0.366131	0.348032	0.372363	0.47293	3279
337	ahpC	b0605	563	2.59211	8331.34	3214.11	0.20589	0.315062	1086.37	0.377957	0.371263	0.380291	0.294692	0.244349	0.367058	0.306372	0.383434	4199
338	ahpF	b0606	1565	1.32676	590.966	445.422	0.234941	0.363565	151.211	0.406898	0.397688	0.41412	0.323533	0.279723	0.288403	0.319867	0.411512	245
343	cspE	b0623	209	3.13934	23170.8	7380.79	0.176917	0.277751	649.033	0.427273	0.400349	0.445248	0.301843	0.389248	0.393224	0.37082	0.438975	175
346	tatE	b0627	203	1.93948	360.234	185.737	0.33878	0.316404	21.046	0.426476	0.383367	0.455813	0.2912	0.372246	0.383367	0.323351	0.439345	126
354	glnS	b0680	1664	1.20691	676.058	560.155	0.21439	0.369309	17.0141	0.477828	0.455599	0.459428	0.366894	0.364485	0.322198	0.36991	0.481037	203
357	seqA	b0687	545	1.097	473.948	432.041	0.248452	0.322624	17.0891	0.404499	0.40226	0.396485	0.240065	0.281254	0.352116	0.266349	0.418526	2871
390	ybgC	b0736	404	0.405843	103.921	256.063	0.277637	0.343243	17.8907	0.451683	0.4279	0.436625	0.37478	0.413501	0.42929	0.390706	0.446076	150
394	tolB	b0740	1292	1.02653	642.108	625.516	0.409265	0.380108	55.0966	0.530995	0.388706	0.601811	0.298632	0.274744	0.314739	0.324972	0.539565	133
395	pal	b0741	521	1.88253	4191.3	2226.42	0.175147	0.327313	141.116	0.394286	0.389524	0.39572	0.361026	0.323848	0.381136	0.377793	0.397027	35
396	ybgF	b0742	791	0.511068	350.487	685.794	0.313146	0.368015	38.6745	0.486093	0.520644	0.447253	0.376728	0.550572	0.617645	0.481141	0.445179	10
414	moaB	b0782	512	0.917314	181.563	197.929	0.26774	0.344043	15.2195	0.452735	0.429475	0.465602	0.352292	0.287425	0.365135	0.338264	0.471106	22
426	ompX	b0814	515	2.30214	11141.4	4839.58	0.185121	0.350563	253.202	0.326119	0.329849	0.320918	0.286114	0.290154	0.30692	0.310097	0.325443	7192
460	clpS	b0881	320	0.616812	60.9346	98.7895	0.413069	0.28825	18.4192	0.458258	0.398471	0.453822	0.354445	0.375006	0.387978	0.377017	0.46481	620
461	clpA	b0882	2276	0.539183	94.3166	174.925	0.335105	0.388888	28.0236	0.435846	0.401752	0.466541	0.254687	0.31131	0.331878	0.302447	0.439295	31
462	lrp	b0889	494	1.39729	651.219	466.06	0.238056	0.334251	35.4323	0.428808	0.4499	0.406448	0.316698	0.353615	0.360217	0.331203	0.437247	7055
464	lolA	b0891	611	1.38423	177.047	127.903	0.38012	0.323437	19.5928	0.432478	0.42454	0.436784	0.352895	0.383941	0.419499	0.377758	0.437096	159
478	rpsA	b0911	1673	0.620512	6418.06	10343.2	0.187188	0.357292	547.628	0.448954	0.45692	0.440507	0.275076	0.52034	0.532258	0.43402	0.444377	111
479	ihfB	b0912	284	1.95303	1667.3	853.697	0.183509	0.28338	117.239	0.354786	0.37206	0.302493	0.326448	0.348198	0.369794	0.343061	0.353236	160
487	smtA	b0921	785	0.275594	44.721	162.271	0.311227	0.349146	16.0926	0.439336	0.445963	0.428093	0.402412	0.355371	0.395724	0.412255	0.445196	892
529	gnsA	b4517	173	3.91546	626.242	159.941	0.291981	0.189711	24.2292	0.342195	0.325754	0.328624	0.289631	0.306359	0.36117	0.305793	0.339708	-10
578	yceD	b1088	521	0.095481	532.897	5581.19	0.262306	0.361823	733.028	0.51985	0.460793	0.492341	0.407753	0.367731	0.380554	0.42499	0.522538	895
579	rpmF	b1089	173	2.77045	19807.8	7149.66	0.144803	0.315491	804.174	0.382913	0.362266	0.400703	0.226399	0.271732	0.361626	0.267153	0.436364	52
581	fabH	b1091	953	0.816368	842.585	1032.11	0.234468	0.394071	43.0065	0.465176	0.472475	0.449869	0.365435	0.363133	0.412271	0.360475	0.47143	68
582	fabD	b1092	929	1.10294	1360.46	1233.49	0.221739	0.413692	41.2922	0.475375	0.513091	0.437149	0.256448	0.434955	0.468372	0.371666	0.476636	16
583	fabG	b1093	734	0.574222	1547.05	2694.17	0.305704	0.383937	166.128	0.583764	0.417702	0.510771	0.345816	0.390998	0.39034	0.388289	0.579664	13
584	acpP	b1094	236	3.23596	38379.7	11860.4	0.211797	0.290381	957.473	0.379191	0.354537	0.399652	0.296713	0.282244	0.357368	0.286353	0.408986	211
585	fabF	b1095	1241	0.529772	1238.24	2337.3	0.217365	0.399041	170.311	0.476239	0.458608	0.479994	0.611908	0.502376	0.502297	0.581329	0.474964	88
591	ptsG	b1101	1433	0.436063	539.176	1236.46	0.203895	0.381724	17.8476	0.463658	0.447116	0.476958	0.482662	0.450537	0.520258	0.475113	0.458175	295
592	hinT	b1103	359	1.16875	227.021	194.244	0.281792	0.332061	17.1455	0.40681	0.344612	0.466288	0.287585	0.289311	0.291651	0.307551	0.429398	2583
593	ycfL	b1104	377	0.116011	17.0573	147.032	0.293381	0.353236	15.1408	0.50753	0.480828	0.489953	0.376835	0.393959	0.436743	0.390756	0.506128	3
598	ndh	b1109	1304	1.58064	1074.83	679.998	0.228513	0.351956	33.6486	0.414904	0.385454	0.414348	0.406423	0.398367	0.385505	0.393521	0.414876	400
600	bhsA	b1112	257	8.57678	258.027	30.0844	0.3692	0.286148	54.3904	0.35408	0.316483	0.386085	0.297638	0.28792	0.32122	0.296632	0.371799	935
607	icd	b1136	1250	1.96183	2597.54	1324.04	0.214847	0.339056	30.2449	0.439367	0.401753	0.462653	0.356426	0.332099	0.317885	0.338393	0.443269	8053
642	emtA	b1193	611	0.970995	137.176	141.273	0.356676	0.360851	16.1375	0.48089	0.460072	0.498092	0.205301	0.397795	0.42962	0.317315	0.485455	3231
664	galU	b1236	908	1.57059	845.631	538.417	0.226871	0.325264	18.7668	0.443753	0.425413	0.453512	0.360535	0.317059	0.397406	0.340388	0.44958	202
667	oppA	b1243	1631	1.88079	1504.91	800.145	0.197499	0.311508	169.223	0.398381	0.377017	0.370483	0.360368	0.376892	0.361324	0.3613	0.392164	738
668	oppB	b1244	920	0.471738	130.408	276.442	0.266029	0.324011	15.055	0.460138	0.415814	0.478777	0.358826	0.327622	0.326375	0.338272	0.466798	86
669	oppC	b1245	908	0.41861	161.065	384.763	0.263318	0.383789	36.281	0.408895	0.406306	0.410678	0.299534	0.319955	0.332745	0.318188	0.415334	15
670	oppD	b1246	1013	0.545766	259.753	475.942	0.230838	0.357957	37.6829	0.405315	0.390292	0.419276	0.297858	0.272133	0.3302	0.304822	0.412448	12
671	oppF	b1247	1004	0.667283	276.724	414.703	0.258136	0.358436	42.3159	0.421096	0.414944	0.421235	0.311033	0.325723	0.357655	0.332642	0.426531	-3
672	yciY	b4595	173	1.62668	455.328	279.913	0.293251	0.347341	36.4722	0.442704	0.514264	0.365681	0.468122	0.554782	0.504512	0.543467	0.349663	2020
678	rluB	b1269	875	1.53581	654.265	426.006	0.261895	0.389783	19.1123	0.44192	0.411755	0.468313	0.432088	0.430712	0.40936	0.433181	0.442337	211
680	topA	b1274	2597	0.804737	300.578	373.51	0.259992	0.368263	16.8127	0.445842	0.428266	0.462478	0.322159	0.348159	0.398547	0.314521	0.446698	667
688	pyrF	b1281	737	1.08944	231.03	212.064	0.302092	0.380353	21.9929	0.434866	0.410992	0.457425	0.258794	0.308597	0.370056	0.307838	0.444619	194
689	yciH	b1282	326	1.06468	142.243	133.602	0.333966	0.308528	20.5522	0.420484	0.439352	0.392175	0.348099	0.395346	0.460499	0.375643	0.419783	0
719	ynaJ	b1332	257	2.41712	674.638	279.108	0.289816	0.332451	34.7763	0.428661	0.413504	0.43108	0.347302	0.378073	0.414609	0.371635	0.423147	273
793	ydcY	b1446	233	1.96582	593.655	301.989	0.24786	0.321803	33.9608	0.394533	0.395643	0.352066	0.375717	0.317007	0.418566	0.372632	0.403659	86
821	marA	b1531	383	1.53329	96.4994	62.9364	0.359163	0.255822	19.8418	0.414164	0.403042	0.410999	0.248338	0.259622	0.394383	0.249341	0.422222	20
882	slyB	b1641	467	2.15392	1853.36	860.458	0.209429	0.348137	28.7329	0.453571	0.428847	0.466828	0.308786	0.310322	0.397564	0.349056	0.464061	4894
892	sodB	b1656	581	3.91284	3601.93	920.541	0.201016	0.327246	71.4348	0.367636	0.350611	0.385059	0.220306	0.322921	0.318008	0.288482	0.372103	128
897	ydhR	b1667	305	1.59739	226.994	142.103	0.322144	0.278	46.3949	0.396608	0.35139	0.41509	0.243683	0.251114	0.308381	0.277544	0.420098	1870
900	lpp	b1677	236	2.48685	106248	42723.8	0.183552	0.333559	3485.06	0.415417	0.377433	0.442788	0.325549	0.27899	0.367828	0.311802	0.437403	311
943	gapA	b1779	995	2.38568	10054.5	4214.52	0.170434	0.314372	31.3975	0.43773	0.436771	0.435476	0.334351	0.383637	0.461122	0.366312	0.437596	10243
958	yoaB	b1809	344	2.88735	547.29	189.548	0.256674	0.317122	19.8794	0.410741	0.403047	0.410581	0.429719	0.411116	0.39509	0.411823	0.399165	6557
995	ftnA	b1905	497	5.73392	323.761	56.4641	0.280006	0.251247	23.4573	0.358544	0.329536	0.375001	0.320108	0.292145	0.302595	0.317852	0.363587	171
997	yecF	b1915	224	7.10143	568.405	80.0409	0.258436	0.277634	26.0872	0.423338	0.449405	0.397601	0.272715	0.377759	0.434046	0.332368	0.438884	4926
1105	yeiP	b2171	572	2.16685	550.511	254.06	0.255972	0.323776	30.1639	0.402163	0.379758	0.405921	0.365324	0.333487	0.376186	0.373255	0.412022	406
1109	spr	b2175	566	0.887228	402.317	453.454	0.236228	0.357279	40.2607	0.45248	0.459312	0.443691	0.337818	0.43561	0.404859	0.377907	0.453472	412
1116	rplY	b2185	284	1.89913	8169.55	4301.73	0.173182	0.270915	568.357	0.370921	0.367818	0.350858	0.221297	0.320608	0.357156	0.296024	0.372997	125
1117	yejL	b2187	227	4.43719	691.778	155.905	0.263969	0.234581	19.5	0.424173	0.405852	0.422303	0.422987	0.347653	0.403915	0.408145	0.445166	1328
1123	rcsB	b2217	650	1.42069	452.511	318.515	0.226361	0.308369	18.2802	0.389774	0.380541	0.397486	0.367654	0.379015	0.382179	0.360451	0.388777	17
1156	ackA	b2296	1202	1.9914	2610.36	1310.82	0.200807	0.3351	30.7127	0.435998	0.418611	0.450891	0.343576	0.371147	0.359906	0.376235	0.425922	4009
1165	fadL	b2344	1340	1.14989	401.463	349.131	0.248028	0.34103	16.6369	0.435089	0.464846	0.395764	0.35039	0.401088	0.415533	0.369924	0.432974	12149
1199	ptsH	b2415	257	2.93412	5146.55	1754.04	0.162368	0.279105	28.9912	0.397249	0.369246	0.411301	0.340746	0.388286	0.349957	0.372126	0.397289	384
1200	ptsI	b2416	1727	0.9437	1228.38	1301.66	0.243911	0.358014	26.5724	0.588132	0.513583	0.598471	0.304946	0.394041	0.432238	0.356164	0.593405	45
1201	crr	b2417	509	1.5387	2796.33	1817.33	0.210073	0.331395	93.6104	0.396829	0.374443	0.415208	0.280964	0.274436	0.329504	0.287374	0.408996	41
1250	suhB	b2533	803	1.39451	741.234	531.538	0.212557	0.36477	27.6382	0.497301	0.461928	0.415846	0.473604	0.483703	0.401068	0.470745	0.495686	10103
1263	yfhL	b2562	260	2.63825	117.308	44.4643	0.419204	0.269308	19.29	0.402499	0.441608	0.363862	0.315576	0.470597	0.420689	0.447221	0.385864	56
1268	trxC	b2582	419	4.07502	156.756	38.4674	0.350368	0.327136	102.367	0.371383	0.337292	0.393139	0.311364	0.317431	0.300405	0.318218	0.376648	1292
1273	bamD	b2595	737	1.2995	536.432	412.799	0.239482	0.35133	15.7401	0.416388	0.386172	0.437315	0.290751	0.357168	0.417123	0.310632	0.41772	11695
1291	rnlA	b2630	1073	0.64608	44.9785	69.6175	0.412732	0.308211	19.2146	0.631928	0.46888	0.538568	0.481829	0.405071	0.429076	0.481942	0.628091	4745
1328	mprA	b2684	530	2.3568	1012.48	429.598	0.216565	0.315547	16.1058	0.44591	0.386551	0.44311	0.352674	0.357282	0.400807	0.359152	0.453427	91
1366	sdaC	b2796	1289	0.696801	657.702	943.888	0.194767	0.355229	37.5262	0.40709	0.416808	0.379727	0.383076	0.349253	0.410893	0.379624	0.394233	557
1378	ygdQ	b2832	713	0.546389	33.2831	60.9146	0.397121	0.333759	20.2544	0.453541	0.491374	0.368629	0.460628	0.455208	0.437161	0.461356	0.440523	69
1415	zapA	b2910	329	0.723261	300.004	414.793	0.332147	0.269878	85.4267	0.405455	0.365716	0.416891	0.29943	0.411263	0.394211	0.374355	0.395121	10511
1438	yggX	b2962	275	1.63646	500.748	305.995	0.297065	0.294036	15.439	0.428379	0.371284	0.469251	0.333333	0.316545	0.358765	0.328425	0.446372	28
1457	ygiN	b3029	314	1.53996	465.574	302.33	0.234685	0.323121	17.0386	0.420638	0.399304	0.434171	0.362965	0.338987	0.373412	0.373077	0.44104	31
1462	yqiC	b3042	290	9.09145	641.384	70.5481	0.272637	0.267897	22.5441	0.349299	0.337678	0.358785	0.378065	0.304665	0.328015	0.382639	0.355404	1517
1478	rpsU	b3065	215	1.8794	18413.5	9797.53	0.207956	0.310791	464.93	0.480954	0.509581	0.452798	0.431542	0.480822	0.512843	0.469512	0.475818	1294
1479	dnaG	b3066	1745	0.131628	47.2748	359.155	0.335488	0.364997	35.0618	0.535116	0.527002	0.473149	0.460316	0.587123	0.563536	0.544642	0.512605	111
1480	rpoD	b3067	1841	1.15621	1045.33	904.097	0.198212	0.35226	38.0822	0.459043	0.436551	0.475164	0.375104	0.46087	0.437874	0.419266	0.455474	195
1508	yhaL	b3107	164	1.20622	83.7707	69.4487	0.431963	0.317927	15.2	0.469648	0.459363	0.476779	0.441154	0.399784	0.436966	0.44611	0.513343	23
1539	yhbY	b3180	293	2.80692	1632.17	581.479	0.194324	0.329078	88.0455	0.424375	0.404348	0.440987	0.436405	0.342098	0.368235	0.416762	0.44774	7810
1541	ispB	b3187	971	0.744703	193.086	259.28	0.26368	0.357673	21.2728	0.431245	0.434739	0.426295	0.33491	0.380162	0.398465	0.379516	0.435526	3314
1547	lptA	b3200	557	0.924425	214.193	231.704	0.26967	0.306068	17.5076	0.413727	0.404926	0.421129	0.31708	0.304555	0.310014	0.331509	0.425229	-31
1554	yrbL	b3207	632	0.751914	123.966	164.867	0.287852	0.340079	19.9784	0.402189	0.394245	0.408722	0.452835	0.329115	0.378219	0.425975	0.409199	214
1565	yhcB	b3233	398	1.06777	269.411	252.311	0.255249	0.368643	27.4851	0.413211	0.403837	0.398972	0.30034	0.411972	0.422149	0.357344	0.406053	3955
1568	argR	b3237	470	1.42379	315.928	221.892	0.25696	0.305872	20.1814	0.431999	0.426859	0.433161	0.262172	0.263112	0.369339	0.266608	0.443218	1436
1569	yhcN	b3238	263	3.26527	292.724	89.6478	0.388699	0.303384	15.2222	0.389086	0.335996	0.375265	0.315421	0.268836	0.332348	0.311085	0.391949	365
1574	accB	b3255	470	1.78141	2847.81	1598.62	0.193318	0.329021	40.3673	0.494595	0.492279	0.395645	0.28042	0.30943	0.38706	0.312575	0.500394	402
1575	accC	b3256	1349	0.591595	953.042	1610.97	0.209603	0.383069	24.6856	0.496154	0.498072	0.492456	0.456596	0.508723	0.509706	0.499943	0.49396	11
1579	dusB	b3260	965	0.0241591	35.794	1481.59	0.284341	0.374497	178.737	0.514484	0.501551	0.524662	0.473977	0.49098	0.476794	0.501728	0.51624	329
1580	fis	b3261	296	2.05662	4515.79	2195.73	0.205485	0.269122	185.019	0.406223	0.391928	0.417691	0.309334	0.412511	0.397725	0.366366	0.40141	26
1592	def	b3287	509	1.08048	326.626	302.296	0.242207	0.31666	42.9688	0.425506	0.424092	0.424031	0.320106	0.370773	0.36766	0.346054	0.418672	3900
1593	fmt	b3288	947	0.691372	214.445	310.173	0.24125	0.372418	34.4259	0.414749	0.439511	0.390958	0.310848	0.452036	0.481761	0.394803	0.410445	15
1596	mscL	b3291	410	1.3595	192.504	141.599	0.329317	0.310146	16.4593	0.387336	0.397528	0.366735	0.404307	0.281202	0.327977	0.384817	0.400353	130
1609	slyX	b3348	218	1.24594	198.813	159.568	0.344743	0.29289	33.4444	0.410625	0.329253	0.432344	0.397629	0.351929	0.338429	0.419533	0.41881	11420
1614	crp	b3357	632	1.13091	722.475	638.842	0.215426	0.34663	33.2687	0.403605	0.405236	0.393131	0.301723	0.402327	0.413028	0.37146	0.396956	761
1632	pck	b3403	1622	1.62012	466.87	288.171	0.260748	0.358039	24.3063	0.448479	0.433781	0.409324	0.366196	0.337361	0.411091	0.342752	0.446651	2166
1661	dcrB	b3472	557	1.57653	548.61	347.985	0.235501	0.353124	15.161	0.420717	0.436031	0.400686	0.351098	0.437073	0.403203	0.393291	0.414231	73
1675	pitA	b3493	1499	0.318415	157.845	495.72	0.252851	0.409186	28.1034	0.503884	0.541707	0.466723	0.397489	0.44589	0.458265	0.392739	0.504268	1749
1676	uspA	b3495	434	4.51223	1089.87	241.537	0.212228	0.287811	66.9012	0.345037	0.348918	0.338383	0.263921	0.264884	0.313131	0.289789	0.351264	970
1705	cspA	b3556	212	2.24015	7347.97	3280.12	0.219443	0.301132	227.311	0.423446	0.342531	0.456371	0.355231	0.336845	0.327489	0.364515	0.438732	281
1754	dut	b3640	455	1.19042	415.777	349.271	0.242818	0.380637	24.5704	0.462282	0.438571	0.480773	0.334132	0.362229	0.374744	0.388173	0.477533	-19
1756	yicC	b3644	863	1.06934	252.71	236.322	0.280467	0.360452	15.2722	0.422587	0.444065	0.398618	0.483844	0.497522	0.483312	0.46484	0.416253	1586
1759	gmk	b3648	623	0.713979	391.423	548.228	0.255952	0.338507	71.0673	0.455546	0.465887	0.434184	0.364981	0.403357	0.414445	0.376584	0.457089	1937
1760	rpoZ	b3649	275	2.16505	2722.07	1257.28	0.186606	0.329455	255.045	0.4125	0.376794	0.435424	0.345318	0.341249	0.377541	0.373495	0.426057	55
1761	spoT	b3650	2108	0.144883	54.4233	375.637	0.416401	0.382443	25.8124	0.765124	0.711504	0.472595	0.383822	0.486374	0.499482	0.470877	0.753472	19
1777	yidQ	b3688	332	0.714971	42.6473	59.649	0.403547	0.354578	15.5314	0.501087	0.454803	0.535659	0.382547	0.364406	0.425429	0.390713	0.516636	3113
1781	rnpA	b3704	359	0.162053	183.096	1129.85	0.400123	0.327103	57.3576	0.564524	0.59316	0.510164	0.514491	0.644627	0.627792	0.615883	0.477006	17
1782	yidD	b4557	257	0.0851038	67.8642	797.428	0.275735	0.387237	48.0877	0.459753	0.438929	0.477073	0.429555	0.350116	0.407491	0.40272	0.480839	-36
1783	yidC	b3705	1646	0.399178	430.712	1079	0.211371	0.375571	47.5294	0.4619	0.448216	0.424056	0.279942	0.407606	0.484248	0.340308	0.457034	3
1803	yifE	b3764	338	1.5303	3670.73	2398.7	0.246405	0.319112	369.88	0.472194	0.431011	0.508588	0.260211	0.287195	0.373556	0.274039	0.51003	8867
1813	trxA	b3781	329	1.9511	2753.05	1411.03	0.206337	0.345289	71.69	0.400224	0.382312	0.411087	0.271473	0.2959	0.357853	0.298276	0.41944	3063
1814	rho	b3783	1259	2.05497	1427.64	694.728	0.206623	0.333312	37.9675	0.504927	0.495729	0.430502	0.329588	0.353487	0.334033	0.333758	0.500117	327
1815	rfe	b3784	1103	0.386694	95.6236	247.285	0.292359	0.363463	17.2216	0.513594	0.494153	0.466193	0.293751	0.368415	0.467475	0.348305	0.517926	240
1827	yifK	b3795	1385	0.481543	102.175	212.183	0.285511	0.398007	16.5361	0.46029	0.466374	0.428533	0.344849	0.341682	0.407937	0.347267	0.45057	191
1836	corA	b3816	950	0.652708	114.756	175.815	0.310792	0.366316	57.9229	0.412084	0.426634	0.392842	0.351268	0.272396	0.282779	0.325998	0.419758	1281
1843	metE	b3829	2261	1.80016	23032.5	12794.7	0.1807	0.385935	192.717	0.412439	0.405025	0.412534	0.267764	0.314823	0.329706	0.31741	0.413247	1078
1846	ubiE	b3833	755	1.2985	421.291	324.444	0.230391	0.346106	33.5344	0.43722	0.415628	0.430985	0.361812	0.330137	0.386897	0.353532	0.442575	95
1847	yigP	b3834	605	0.468512	117.799	251.433	0.282685	0.399702	17.1493	0.479443	0.476901	0.464471	0.356196	0.368553	0.470103	0.368733	0.477574	14
1849	tatA	b3836	269	1.78268	715.013	401.09	0.257493	0.290595	72.5542	0.38794	0.396251	0.379644	0.294315	0.222628	0.390559	0.313237	0.408844	79
1850	tatB	b3838	515	0.241329	98.5426	408.332	0.269262	0.353223	27.4733	0.482761	0.477953	0.432263	0.403683	0.569424	0.509533	0.485301	0.453658	4
1861	dsbA	b3860	626	2.09037	835.477	399.679	0.242139	0.337061	18.7638	0.43677	0.431777	0.440409	0.407135	0.492113	0.394017	0.460496	0.432554	17
1866	typA	b3871	1823	0.878523	1595.07	1815.63	0.19113	0.361744	55.3161	0.425273	0.406124	0.437765	0.453666	0.455075	0.411948	0.461685	0.42091	4989
1882	sodA	b3908	620	2.36725	4119.84	1740.35	0.205843	0.35	28.6125	0.414793	0.368953	0.452036	0.255134	0.22965	0.324355	0.240225	0.431986	1316
1887	pfkA	b3916	962	1.27001	395.445	311.372	0.246912	0.376383	16.9636	0.424503	0.425342	0.413974	0.401884	0.406876	0.406413	0.431132	0.42253	181
1894	rpmE	b3936	212	1.71998	5754	3345.39	0.201019	0.286462	663.891	0.384918	0.339356	0.424246	0.327975	0.306653	0.337108	0.315089	0.41425	8253
1898	katG	b3942	2180	0.983191	182.712	185.836	0.302088	0.391317	69.4333	0.440806	0.420984	0.452358	0.367359	0.361767	0.392423	0.38899	0.441672	329
1909	fabR	b3963	647	0.600866	93.6634	155.881	0.285902	0.376553	17.856	0.492647	0.510066	0.473681	0.416483	0.463102	0.527328	0.465633	0.48411	1717
1910	yijD	b3964	359	1.63913	212.176	129.444	0.312963	0.322423	18.0879	0.363091	0.351817	0.358246	0.406432	0.313267	0.367042	0.400635	0.356378	0
1915	tufB	b3980	1184	1.56477	31230.8	19958.7	0.212476	0.35853	87.4009	0.938928	0.92087	0.954413	0.54125	0.564844	0.691043	0.522107	0.957894	1897
1916	secE	b3981	383	0.554137	953.694	1721.04	0.20502	0.387415	184.073	0.407366	0.441119	0.369332	0.386144	0.405109	0.43168	0.400377	0.398577	230
1917	nusG	b3982	545	0.948382	1665	1755.63	0.191399	0.385009	167.225	0.445969	0.409627	0.477551	0.304428	0.346415	0.358674	0.315811	0.45514	2
1918	rplK	b3983	428	1.29133	12523.5	9698.18	0.158556	0.366262	747.043	0.438262	0.418151	0.455685	0.368612	0.386393	0.386992	0.38693	0.444214	159
1919	rplA	b3984	704	0.935114	12600.1	13474.4	0.187911	0.354077	829.279	0.424623	0.413448	0.430007	0.326584	0.313754	0.358634	0.310302	0.434866	4
1920	rplJ	b3985	497	0.639827	14119.4	22067.6	0.192895	0.361569	1952.38	0.468011	0.4656	0.469261	0.280338	0.241651	0.352511	0.295346	0.494969	413
1921	rplL	b3986	365	1.87034	34118	18241.6	0.172975	0.305753	1958.96	0.395621	0.39729	0.381004	0.342424	0.297863	0.392449	0.357892	0.411602	67
1922	rpoB	b3987	4028	0.752156	1662.41	2210.2	0.198592	0.372649	70.7024	0.456156	0.430545	0.460844	0.305372	0.359527	0.375343	0.345078	0.457413	320
1923	rpoC	b3988	4223	0.641611	1691.78	2636.76	0.19846	0.391487	130.016	0.458663	0.457364	0.453478	0.343119	0.276973	0.384528	0.33438	0.459933	77
1929	hupA	b4000	272	2.56523	6826.65	2661.22	0.166865	0.299485	220.716	0.393673	0.361398	0.372346	0.356219	0.308191	0.393175	0.345539	0.415197	187
1956	lexA	b4043	608	0.896491	298.497	332.962	0.264727	0.387056	53.2763	0.463667	0.444493	0.47885	0.423899	0.3892	0.415453	0.432657	0.466142	110
1969	ssb	b4059	536	2.40367	1232.91	512.928	0.24832	0.410616	34.3748	0.463678	0.394538	0.527645	0.250482	0.3381	0.369202	0.304337	0.476397	3111
1986	proP	b4111	1502	0.658524	74.4742	113.093	0.360598	0.367284	15.9762	0.463466	0.463808	0.423908	0.341792	0.331089	0.40689	0.335232	0.46237	264
1994	groS	b4142	293	1.90969	5888.91	3083.7	0.202582	0.317509	26.5606	0.427831	0.463671	0.385858	0.348276	0.421063	0.45753	0.389266	0.422962	1548
1995	groL	b4143	1646	1.67343	6009.84	3591.33	0.187346	0.36181	45.0482	0.427563	0.393672	0.447394	0.242944	0.316406	0.333731	0.330316	0.430572	44
1997	efp	b4147	566	1.74504	3757.79	2153.41	0.17987	0.347668	63.3985	0.383508	0.382397	0.382903	0.276991	0.336729	0.384745	0.322417	0.386813	2537
2000	sugE	b4148	317	0.357532	25.1426	70.3227	0.427548	0.37653	24.1007	0.479414	0.476273	0.418948	0.409049	0.407137	0.50747	0.42854	0.455502	176
2010	miaA	b4171	950	0.0844394	51.9462	615.189	0.377722	0.393295	50	0.608823	0.518583	0.53252	0.386415	0.355705	0.392473	0.392928	0.601578	-7
2011	hfq	b4172	308	2.46466	3092.84	1254.87	0.201233	0.322013	145.599	0.405555	0.39333	0.412704	0.375842	0.465259	0.456969	0.415822	0.386379	86
2014	hflC	b4175	1004	0.417035	201.041	482.072	0.226583	0.37245	20.3005	0.447489	0.425987	0.465157	0.403996	0.413435	0.420681	0.426803	0.448457	3
2016	purA	b4177	1298	1.0158	892.294	878.419	0.230896	0.378875	29.4381	0.490168	0.484203	0.462779	0.475407	0.386717	0.404411	0.432205	0.484207	104
2034	rpsF	b4200	395	1.48126	14924.7	10075.7	0.153131	0.336557	1471.39	0.528828	0.493838	0.545779	0.336208	0.396876	0.437286	0.385331	0.542213	732
2035	priB	b4201	314	0.0103505	81.7289	7896.15	0.189381	0.388981	1108.95	0.528282	0.524382	0.525698	0.550558	0.51123	0.533546	0.518129	0.529491	7
2036	rpsR	b4202	227	1.84224	13484	7319.36	0.16683	0.27141	1045.29	0.450054	0.427029	0.467975	0.498904	0.450838	0.440398	0.477191	0.438926	5
2037	rplI	b4203	449	1.02132	9576.81	9376.87	0.164831	0.346637	1209.91	0.459234	0.457677	0.458494	0.339259	0.374077	0.491239	0.368232	0.470028	42
2039	fklB	b4207	620	2.68992	815.208	303.06	0.240306	0.367371	25.5601	0.40837	0.423855	0.39183	0.44775	0.327079	0.344328	0.433982	0.412691	837
2044	ytfK	b4217	206	1.07432	231.703	215.675	0.305466	0.278883	17.2542	0.430296	0.428794	0.414145	0.404052	0.452091	0.427996	0.430022	0.411771	942
2047	ytfP	b4222	341	0.662065	162.499	245.442	0.260537	0.353372	34.4038	0.430367	0.446059	0.412138	0.278926	0.361905	0.398524	0.332694	0.451316	3
2061	rraB	b4255	416	2.11646	976.059	461.175	0.257561	0.299231	53.6718	0.383119	0.353412	0.389227	0.304347	0.217724	0.259412	0.287259	0.399019	1222
2105	holD	b4372	413	0.18457	40.9753	222.004	0.338794	0.385642	22.612	0.489483	0.438789	0.493556	0.435519	0.410174	0.434392	0.47927	0.491865	1763
2139	rpsT	b0023	263	1.2516	14515.6	11597.6	0.205825	0.286806	850.526	0.43345	0.399612	0.441178	0.314523	0.327169	0.376837	0.317119	0.456857	13703
2150	surA	b0053	1286	0.965451	357.211	369.994	0.250722	0.372348	18.3254	0.460544	0.477941	0.427358	0.328856	0.337013	0.438864	0.339238	0.465957	53
2176	speD	b0120	794	1.22159	387.979	317.602	0.216958	0.274723	15.4967	0.354519	0.334027	0.375942	0.306521	0.221285	0.296131	0.307229	0.363295	16
2177	speE	b0121	866	1.02423	418.27	408.376	0.227156	0.333152	32.4516	0.432095	0.409826	0.361814	0.369342	0.323896	0.321104	0.350229	0.432482	106
2180	can	b0126	662	1.69943	676.041	397.805	0.219805	0.332054	20.564	0.406888	0.390661	0.403579	0.418906	0.390834	0.377189	0.417896	0.407093	3644
2181	panD	b0131	380	2.14655	1187.05	553.005	0.217251	0.343211	20.4217	0.435551	0.405333	0.442966	0.358545	0.456152	0.432572	0.406874	0.430015	1250
2192	pcnB	b0143	1397	0.502046	168.958	336.54	0.248382	0.377437	22.6572	0.422632	0.396482	0.387631	0.2538	0.320528	0.415757	0.297281	0.424793	60
2194	dksA	b0145	455	1.4454	1782.91	1233.51	0.193451	0.35044	123.54	0.434816	0.393619	0.466469	0.297711	0.339408	0.33313	0.343224	0.441722	178
2200	mtn	b0159	698	1.59651	555.994	348.256	0.271656	0.365731	18.9133	0.411377	0.403343	0.400371	0.385857	0.387097	0.394362	0.413295	0.408239	4556
2205	map	b0168	794	1.567	782.501	499.364	0.213113	0.342544	17.5752	0.433364	0.398512	0.464579	0.354134	0.388556	0.409353	0.368018	0.432938	24172
2206	rof	b0189	254	0.860001	111.595	129.762	0.401794	0.326024	28.8489	0.455678	0.443278	0.4566	0.329618	0.412855	0.440461	0.407722	0.466257	-7
2207	yaeP	b4406	200	0.519216	70.7288	136.222	0.308084	0.2901	30.5322	0.412618	0.394728	0.426835	0.355017	0.344099	0.394728	0.384371	0.440234	2054
2212	metQ	b0197	815	1.57203	2131.7	1356.02	0.207541	0.321521	54.8804	0.402272	0.39399	0.401784	0.356331	0.338996	0.365346	0.342733	0.406221	40
2216	mltD	b0211	1358	0.309928	61.3016	197.793	0.325441	0.382482	26.6117	0.499781	0.543272	0.453997	0.493081	0.449358	0.462194	0.495531	0.497179	72
2225	dinJ	b0226	260	1.90748	100.672	52.7776	0.347597	0.287923	22.3939	0.417989	0.444068	0.333459	0.44958	0.404373	0.493298	0.438105	0.376593	1853
2273	ykgM	b0296	263	1.91985	14097	7342.72	0.207061	0.29057	417.03	0.425753	0.386621	0.452774	0.449827	0.369033	0.381647	0.470193	0.437268	936
2306	ddlA	b0381	1094	1.59185	383.416	240.861	0.271408	0.360009	18.0582	0.438947	0.430938	0.432091	0.337596	0.310141	0.3851	0.361718	0.440961	3912
2313	tsx	b0411	884	1.62353	893.658	550.441	0.212868	0.334231	16.3181	0.390618	0.387313	0.375573	0.416837	0.32707	0.370671	0.388929	0.392154	299
2318	xseB	b0422	242	1.2043	219.714	182.442	0.274184	0.311983	16.5681	0.426548	0.447542	0.366832	0.41124	0.461973	0.466058	0.418726	0.410054	1708
2322	cyoE	b0428	890	0.13657	222.816	1631.51	0.249153	0.397596	91.777	0.492966	0.525203	0.424995	0.461576	0.511874	0.563143	0.506392	0.475919	12
2323	cyoD	b0429	329	0.700873	1269.18	1810.85	0.196796	0.344468	101.237	0.421273	0.427553	0.408383	0.309828	0.311923	0.397411	0.304055	0.442739	0
2324	cyoC	b0430	614	0.478154	792.839	1658.12	0.214476	0.390782	77.1043	0.431383	0.441394	0.418046	0.297402	0.315866	0.387398	0.293527	0.446643	-10
2325	cyoB	b0431	1991	0.346232	633.328	1829.2	0.205905	0.373179	48.1116	0.42598	0.441457	0.410128	0.319014	0.333503	0.367722	0.330121	0.425543	22
2326	cyoA	b0432	947	0.546985	1101.14	2013.12	0.177642	0.32226	81.061	0.478842	0.469056	0.440763	0.281552	0.325545	0.364981	0.310645	0.483175	460
2334	ylaC	b0458	470	2.83986	76.1319	26.8083	0.373611	0.27583	56.1247	0.394699	0.358424	0.414369	0.318637	0.279572	0.290594	0.310758	0.416177	116
2363	ppiB	b0525	494	1.88382	1934.95	1027.14	0.209213	0.303522	20.1118	0.410826	0.410546	0.406313	0.241041	0.282181	0.343995	0.264693	0.426416	1595
2365	ybcJ	b0528	212	1.6614	364.708	219.519	0.24475	0.371698	16.929	0.42473	0.470173	0.37315	0.324708	0.406053	0.451899	0.354333	0.42968	2
2366	folD	b0529	866	1.68072	292.735	174.173	0.265684	0.373291	21.3405	0.457169	0.458331	0.415394	0.322471	0.350342	0.391339	0.343548	0.456476	6107
2374	borD	b0557	293	2.41954	2265.4	936.294	0.203992	0.256382	30.2538	0.388698	0.378701	0.39224	0.45176	0.365249	0.37567	0.418492	0.38054	291
2378	ompT	b0565	953	2.09434	3655.27	1745.31	0.194616	0.277041	99.5801	0.353193	0.325526	0.378329	0.351424	0.269708	0.316977	0.35005	0.35101	514
2401	uspG	b0607	428	1.71753	98.6489	57.4366	0.405241	0.315	28.0376	0.363	0.325145	0.378883	0.315916	0.241295	0.321454	0.315454	0.379902	1690
2413	lipA	b0628	965	1.48317	907.711	612.007	0.233437	0.356124	23.1314	0.449819	0.432753	0.439504	0.346953	0.385432	0.423418	0.349129	0.444913	209
2422	ybeB	b0637	317	1.52467	736.567	483.099	0.22046	0.385931	26.8993	0.41458	0.383513	0.431133	0.366224	0.366359	0.366107	0.362934	0.421319	260
2441	miaB	b0661	1424	1.46332	421.246	287.869	0.256469	0.38184	28.3348	0.44198	0.458775	0.414108	0.314942	0.401589	0.406792	0.405089	0.439802	2558
2447	fur	b0683	446	0.919553	634.629	690.149	0.214805	0.304686	211.031	0.389971	0.405825	0.365284	0.322978	0.358795	0.37819	0.342468	0.391324	-7
2450	ybfE	b0685	293	1.10519	108.24	97.9375	0.291235	0.313311	21.6402	0.440419	0.380778	0.498488	0.308169	0.401352	0.40279	0.37768	0.445102	140
2472	gpmA	b0755	752	1.89661	2289.44	1207.12	0.196931	0.34488	39.9751	0.426177	0.436947	0.413931	0.405587	0.343167	0.399046	0.358262	0.428241	202
2504	dps	b0812	503	2.04644	201.799	98.6094	0.354799	0.305726	246.572	0.359707	0.315912	0.398282	0.220378	0.186161	0.303952	0.213114	0.37417	299
2507	ybiS	b0819	920	1.99181	423.389	212.564	0.235333	0.366174	21.1369	0.439891	0.427439	0.451535	0.366684	0.365604	0.402139	0.367529	0.443383	2052
2522	grxA	b0849	257	2.30871	166.248	72.0091	0.378453	0.279533	174.947	0.381489	0.39417	0.329612	0.435057	0.323384	0.367718	0.412024	0.362825	9091
2538	cspD	b0880	224	0.885282	87.3943	98.7192	0.389439	0.305223	15.2462	0.456105	0.458431	0.431134	0.33302	0.432009	0.469101	0.38259	0.457707	3635
2539	infA	b0884	218	1.73701	2869.15	1651.78	0.205327	0.275826	335.513	0.385425	0.349445	0.414871	0.34371	0.352187	0.349134	0.349187	0.395244	285
2543	trxB	b0888	965	1.02073	709.363	694.954	0.215026	0.365627	44.1741	0.425834	0.425089	0.41794	0.405744	0.329348	0.402834	0.416059	0.431036	12881
2547	pflB	b0903	2282	1.26669	764.556	603.588	0.212546	0.333265	16.6689	0.450496	0.419032	0.465355	0.325311	0.367856	0.374416	0.337119	0.452017	55
2552	ompF	b0929	1088	1.98581	6809	3428.82	0.19661	0.336415	113.316	0.415356	0.433274	0.397754	0.427545	0.485876	0.423707	0.444743	0.41024	603
2553	asnS	b0930	1400	1.11921	1182.5	1056.55	0.211375	0.371086	15.5259	0.463131	0.462366	0.463342	0.349779	0.476224	0.447694	0.409229	0.459828	169
2561	fabA	b0954	518	1.52881	1937.6	1267.39	0.234428	0.384768	108.067	0.43648	0.429904	0.437748	0.371437	0.306428	0.393106	0.378401	0.453771	69
2563	ompA	b0957	1040	1.25323	13316.4	10625.7	0.187559	0.367644	737.756	0.412111	0.405962	0.410626	0.351306	0.398797	0.386937	0.400378	0.408982	357
2569	hspQ	b0966	317	0.342666	91.344	266.568	0.241252	0.371577	25.5174	0.474843	0.480233	0.459279	0.409751	0.421752	0.4277	0.422714	0.471309	58
2614	bssS	b1060	254	0.116293	16.3681	140.749	0.329967	0.301693	57.6356	0.420032	0.444662	0.384684	0.443988	0.454426	0.457739	0.445869	0.403844	287
2664	dsbB	b1185	530	0.876924	150.961	172.149	0.30715	0.372528	21.1198	0.436509	0.430979	0.440856	0.474318	0.399863	0.392643	0.464961	0.439072	146
2678	prs	b1207	947	0.942056	1325.37	1406.89	0.190827	0.365945	60.5174	0.459994	0.437093	0.479006	0.253075	0.295228	0.342233	0.278843	0.469176	151
2691	hns	b1237	413	10.6542	8408.88	789.253	0.184927	0.276586	317.065	0.397994	0.369672	0.413395	0.24692	0.331371	0.302242	0.32425	0.404107	2215
2714	yciN	b1273	251	3.44799	557.96	161.822	0.246687	0.276892	30.6396	0.364825	0.371669	0.354658	0.371853	0.308913	0.359894	0.338284	0.383984	7902
2722	fabI	b1288	788	1.89236	3199	1690.48	0.17532	0.360888	28.0619	0.407074	0.375614	0.37838	0.220004	0.296914	0.339878	0.290197	0.413235	368
2734	tpx	b1324	506	2.67044	3565.13	1335.04	0.188964	0.329526	68.501	0.369674	0.348191	0.388636	0.282753	0.319674	0.357064	0.331193	0.377197	1059
2740	fnr	b1334	752	1.12139	597.964	533.235	0.250128	0.339229	27.7331	0.416854	0.390213	0.419091	0.387657	0.345213	0.44533	0.417386	0.403345	195
2852	gnsB	b1550	173	5.09789	353.709	69.3834	0.352913	0.153237	17.0486	0.343132	0.27719	0.307759	0.234957	0.283789	0.291176	0.265618	0.35268	172
2891	tyrS	b1637	1274	1.16482	605.738	520.025	0.240611	0.366272	42.8908	0.448066	0.452226	0.424206	0.318916	0.354804	0.405232	0.340724	0.448549	129
2895	slyA	b1642	434	1.34611	112.661	83.694	0.324967	0.305991	19.8198	0.409548	0.418805	0.399003	0.285817	0.342933	0.405802	0.317552	0.405699	3310
2899	grxD	b1654	347	2.58171	1284.48	497.533	0.19467	0.342939	43.9403	0.38828	0.360882	0.411603	0.2398	0.274106	0.326489	0.265567	0.417756	2020
2930	ihfA	b1712	299	0.556895	607.194	1090.32	0.209582	0.316522	93.5074	0.429225	0.319371	0.428669	0.308973	0.303012	0.31209	0.325269	0.440789	5
2931	pheT	b1713	2387	1.20074	879.611	732.557	0.244169	0.389589	15.1951	0.608261	0.465082	0.623609	0.378654	0.374891	0.432036	0.403576	0.611466	15
2934	rplT	b1716	356	1.00117	13177.5	13162.1	0.185574	0.331096	1074.2	0.464295	0.451179	0.457289	0.421383	0.398686	0.469101	0.397166	0.473856	53
2935	rpmI	b1717	197	1.52167	18444.2	12121	0.166483	0.286091	1072.79	0.476434	0.448549	0.493685	0.380687	0.424922	0.445905	0.412432	0.495364	97
2936	infC	b1718	542	0.243334	2122.99	8724.62	0.404228	0.333875	665.702	0.609733	0.396057	0.517009	0.304234	0.313185	0.32961	0.31667	0.602218	4
2937	thrS	b1719	1928	0.944424	1293.56	1369.69	0.248522	0.345742	44.3144	0.547405	0.429884	0.56987	0.337215	0.340666	0.418492	0.366324	0.553143	2755
2973	mipA	b1782	746	2.30451	1691.39	733.948	0.209081	0.338391	30.3431	0.419598	0.420303	0.408523	0.335756	0.389508	0.442753	0.380266	0.42132	7606
2990	cspC	b1823	209	4.08544	10240.5	2506.58	0.204847	0.309569	148.806	0.428271	0.408642	0.411069	0.267314	0.368211	0.404097	0.363983	0.437495	13
2992	yebO	b1825	287	0.712911	187.84	263.483	0.301842	0.289338	31.5969	0.404548	0.386631	0.382392	0.478996	0.320311	0.419394	0.460858	0.373504	75
2997	proQ	b1831	698	1.1141	1276.58	1145.84	0.200841	0.349799	60.8117	0.40041	0.405319	0.395118	0.338667	0.359116	0.402798	0.344256	0.402325	97
3007	eda	b1850	641	1.83778	764.14	415.796	0.239423	0.388456	33.3725	0.453189	0.452731	0.452754	0.369174	0.403869	0.440517	0.423487	0.456707	37
3012	znuA	b1857	932	2.32682	6156.54	2645.9	0.196192	0.34633	15.1772	0.449889	0.461426	0.429141	0.403804	0.40823	0.433307	0.447892	0.453134	1763
3015	ruvC	b1863	521	0.0806802	33.2172	411.714	0.246934	0.416641	16.7033	0.465373	0.47517	0.454749	0.407869	0.541444	0.581535	0.489459	0.455235	35
3016	yebC	b1864	740	1.51694	1169.82	771.167	0.215532	0.355054	22.7764	0.424019	0.415907	0.428979	0.282602	0.311507	0.313039	0.333271	0.427379	29
3017	nudB	b1865	452	0.0444141	23.0841	519.747	0.24808	0.392788	17.331	0.498006	0.535705	0.453765	0.544254	0.513803	0.581343	0.511327	0.493381	118
3045	yecJ	b4537	251	7.90594	229.636	29.0461	0.253895	0.251753	18.0946	0.413954	0.38525	0.333879	0.364112	0.378331	0.385813	0.376074	0.36579	1493
3059	yedD	b1928	413	1.75691	448.994	255.56	0.269442	0.399225	25.6406	0.515962	0.510647	0.518823	0.549645	0.511941	0.527469	0.553056	0.491685	3947
3064	dsrB	b1952	188	2.46357	190.831	77.4613	0.413333	0.315798	16.3899	0.402337	0.346554	0.404716	0.466732	0.347404	0.341756	0.499557	0.417778	1500
3090	yeeX	b2007	329	2.30509	829.098	359.682	0.238279	0.273678	18.5067	0.364814	0.327182	0.389674	0.266467	0.324221	0.331393	0.312833	0.374877	172
3096	yeeF	b2014	1358	0.530865	838.81	1580.08	0.210165	0.365825	18.5688	0.450158	0.453873	0.420099	0.354249	0.477932	0.453825	0.473256	0.433715	267
3101	cld	b2027	980	0.643252	380.22	591.091	0.238973	0.318531	66.9737	0.407051	0.413816	0.386971	0.338511	0.32328	0.357083	0.362401	0.411035	146
3103	gnd	b2029	1406	1.2931	2021.96	1563.65	0.18608	0.34564	39.398	0.389519	0.383431	0.389472	0.343824	0.355065	0.375181	0.351387	0.389954	1673
3107	wbbK	b2032	1118	0.784499	54.4298	69.3816	0.344002	0.242487	22.7264	0.35318	0.34568	0.359514	0.341638	0.320978	0.313791	0.339441	0.354483	-15
3108	wbbJ	b2033	590	0.579634	77.5527	133.796	0.300669	0.27222	24.8217	0.360852	0.332237	0.373555	0.239392	0.231374	0.25416	0.247441	0.362726	-19
3109	wbbI	b2034	992	1.92013	214.178	111.544	0.304111	0.262218	28.9564	0.366233	0.38963	0.343006	0.293944	0.264934	0.288264	0.300475	0.371452	3
3110	rfc	b2035	1166	0.204972	15.6	76.1082	0.37102	0.246441	18.3131	0.341606	0.3408	0.331925	0.320705	0.353757	0.37812	0.330138	0.34055	0
3111	glf	b2036	1103	2.09141	278.185	133.014	0.321061	0.250082	19.6304	0.345326	0.364225	0.320175	0.298966	0.327291	0.308261	0.320894	0.343383	8
3113	rfbC	b2038	557	0.883709	163.241	184.722	0.266465	0.285583	16.233	0.391217	0.407421	0.358213	0.335188	0.367723	0.414649	0.371844	0.383055	0
3114	rfbA	b2039	881	1.41993	345.215	243.122	0.26809	0.304642	15.1244	0.404166	0.409964	0.387673	0.337303	0.264608	0.322344	0.302426	0.408241	58
3116	rfbB	b2041	1085	1.43314	466.509	325.516	0.241019	0.307419	16.7737	0.386709	0.372416	0.394897	0.280147	0.31195	0.285578	0.30456	0.38732	373
3117	galF	b2042	893	0.899814	557.889	620.005	0.229819	0.345733	15.3438	0.465539	0.481612	0.400392	0.446785	0.393791	0.434235	0.423685	0.454739	175
3167	mrp	b2113	1109	1.19985	396.367	330.346	0.252074	0.383995	16.6778	0.437443	0.448421	0.424968	0.358839	0.394091	0.406918	0.384734	0.440429	17558
3187	folE	b2153	668	2.28761	1808.01	790.347	0.215883	0.320434	19.5258	0.41738	0.385006	0.414945	0.351156	0.368545	0.376182	0.353471	0.414604	1126
3200	yejG	b2181	344	1.23027	225.087	182.957	0.324017	0.305581	63.1746	0.396382	0.373552	0.40249	0.272858	0.27714	0.33426	0.300362	0.422625	333
3227	ompC	b2215	1103	1.57222	13376.5	8508.01	0.183244	0.341623	384.541	0.436935	0.409132	0.461326	0.328169	0.422663	0.454669	0.37175	0.4357	4278
3234	gyrA	b2231	2627	0.573082	416.702	727.124	0.222305	0.390544	22.3618	0.491668	0.490578	0.465307	0.341532	0.371315	0.427022	0.355814	0.487968	997
3262	nuoJ	b2280	554	0.250629	92.5793	369.388	0.290739	0.401769	15.0762	0.461574	0.435807	0.479459	0.315314	0.384586	0.389533	0.361555	0.46908	12
3269	nuoB	b2287	662	0.900337	435.952	484.21	0.244921	0.3729	20.9874	0.500456	0.473352	0.483298	0.284506	0.344721	0.368117	0.35023	0.517623	16
3270	nuoA	b2288	443	0.776855	212.635	273.712	0.239306	0.347111	26.2295	0.40508	0.386571	0.414225	0.33009	0.296774	0.281683	0.336283	0.42173	631
3276	yfcD	b2299	542	0.99375	246.107	247.655	0.270263	0.355129	15.9103	0.483979	0.458221	0.507375	0.435312	0.416044	0.45736	0.419793	0.489268	58
3277	yfcE	b2300	554	0.773458	161.762	209.142	0.293486	0.373285	19.8724	0.494123	0.486624	0.484801	0.421166	0.4032	0.421426	0.45868	0.464904	53
3287	cvpA	b2313	488	0.166164	23.411	140.891	0.302508	0.348709	25.8083	0.475249	0.465641	0.455556	0.4689	0.504114	0.500302	0.488431	0.462668	259
3290	accD	b2316	914	0.88055	751.455	853.393	0.220469	0.389223	34.0294	0.47706	0.496656	0.443862	0.343723	0.414412	0.393747	0.391315	0.473113	156
3296	fabB	b2323	1220	1.28383	1318.12	1026.71	0.209568	0.387672	18.0982	0.514956	0.525066	0.435873	0.32356	0.353561	0.350704	0.337985	0.501494	2286
3302	prmB	b2330	932	1.06802	243.671	228.152	0.269789	0.368777	19.9967	0.453629	0.436161	0.453275	0.35391	0.291238	0.404063	0.347205	0.448625	788
3310	sixA	b2340	485	0.672686	124.681	185.348	0.300453	0.381443	28.0022	0.47078	0.45913	0.47531	0.295794	0.345314	0.392407	0.342213	0.489889	203
3313	yfcZ	b2343	284	3.07909	626.881	203.593	0.272318	0.327042	34.298	0.529589	0.546285	0.510244	0.395223	0.370387	0.488229	0.391619	0.544911	3318
3345	zipA	b2412	986	0.302158	120.638	399.256	0.239304	0.383621	36.5946	0.459163	0.465809	0.422319	0.270796	0.44539	0.476043	0.353889	0.455394	5153
3354	yfeX	b2431	899	1.14369	292.995	256.183	0.245734	0.379399	18.292	0.436005	0.436052	0.428205	0.364269	0.356573	0.431927	0.354135	0.439598	96
3355	yfeY	b2432	575	0.485389	46.5739	95.9517	0.382127	0.371478	18.5	0.46361	0.486159	0.439145	0.455318	0.432541	0.444494	0.437802	0.461499	61
3384	bamC	b2477	1034	0.517466	253.608	490.095	0.234606	0.408656	82.996	0.459637	0.467616	0.446051	0.328853	0.388929	0.421233	0.352283	0.45628	17
3385	dapA	b2478	878	0.804609	430.592	535.156	0.217212	0.362005	56.9611	0.484734	0.456856	0.461	0.451651	0.389597	0.348746	0.425408	0.488591	15060
3387	hda	b2496	746	0.35296	33.6087	95.2197	0.446818	0.376528	15.2343	0.499637	0.492105	0.42649	0.719253	0.55081	0.475056	0.655836	0.474933	50
3389	upp	b2498	626	1.9011	1452.78	764.181	0.209837	0.37762	68.1541	0.438892	0.411105	0.463152	0.360605	0.326413	0.371999	0.36233	0.450231	5823
3394	der	b2511	1472	1.05554	323.527	306.504	0.269782	0.357561	21.5939	0.450277	0.449896	0.444134	0.347836	0.412829	0.410561	0.361841	0.450969	118
3395	bamB	b2512	1178	0.631856	272.672	431.542	0.250971	0.40281	40.1828	0.444167	0.448196	0.439167	0.384667	0.341924	0.390244	0.35958	0.447186	11
3396	yfgM	b2513	620	0.725953	265.478	365.696	0.271696	0.363242	34.8714	0.483735	0.427296	0.508771	0.325559	0.353843	0.366404	0.359762	0.496261	18
3397	hisS	b2514	1274	0.885752	370.15	417.893	0.249603	0.390447	19.2104	0.483723	0.461694	0.473194	0.329582	0.373405	0.364957	0.373256	0.482476	111
3400	rlmN	b2517	1154	0.796814	275.146	345.308	0.261875	0.385936	19.0524	0.457311	0.466405	0.444814	0.310637	0.400342	0.391401	0.380008	0.461114	150
3401	ndk	b2518	431	2.33645	3186.94	1364.01	0.191365	0.332251	48.4154	0.467232	0.45082	0.440061	0.350919	0.416178	0.466958	0.375662	0.474813	149
3410	iscA	b2528	323	0.443313	540.299	1218.77	0.209795	0.314737	39.2109	0.518336	0.548795	0.486515	0.428252	0.475405	0.509563	0.455896	0.525182	17
3411	iscU	b2529	386	1.81058	1407.5	777.374	0.200654	0.340984	28.9188	0.44902	0.43978	0.454514	0.359878	0.396875	0.416378	0.386767	0.448353	28
3412	iscS	b2530	1214	1.18526	1235.72	1042.58	0.191127	0.359975	29.6979	0.419518	0.406403	0.422548	0.263584	0.321643	0.353171	0.308389	0.424118	112
3413	iscR	b2531	488	1.82455	677.591	371.374	0.232233	0.357295	38.8802	0.430844	0.396161	0.439231	0.29308	0.323024	0.310982	0.296375	0.439064	452
3414	trmJ	b2532	740	1.219	353.492	289.986	0.276813	0.406068	18.4473	0.448814	0.435765	0.456247	0.348047	0.333791	0.39292	0.378751	0.457589	3384
3423	glyA	b2551	1253	1.68021	2407.72	1432.98	0.190224	0.360646	51.4975	0.432814	0.404639	0.43653	0.285338	0.293606	0.305574	0.310082	0.437554	1563
3424	glnB	b2553	338	1.5238	473.993	311.059	0.262858	0.361568	16.7735	0.424583	0.4329	0.41244	0.349804	0.326519	0.410764	0.367393	0.446586	61
3429	tadA	b2559	503	0.552956	68.9029	124.608	0.375993	0.389145	19.8713	0.440184	0.43994	0.43677	0.377297	0.370313	0.417829	0.407938	0.446251	58
3435	rnc	b2567	680	1.05958	348.363	328.774	0.260924	0.354338	17.172	0.439056	0.398851	0.45906	0.30743	0.26068	0.278558	0.278323	0.455246	272
3436	lepB	b2568	974	0.243006	76.2438	313.752	0.26881	0.389867	15.781	0.443817	0.457902	0.42996	0.441341	0.534564	0.50499	0.447933	0.436326	16
3437	lepA	b2569	1799	1.14022	528.387	463.409	0.244554	0.373902	20.2514	0.422794	0.411586	0.432966	0.28142	0.265463	0.325217	0.309808	0.428068	198
3439	rseB	b2571	956	0.432294	65.9958	152.664	0.312338	0.351318	19.6699	0.542928	0.536107	0.460473	0.281002	0.357479	0.539291	0.349609	0.472789	0
3440	rseA	b2572	650	0.668668	151.185	226.099	0.280123	0.348277	108.322	0.434966	0.457146	0.390997	0.362865	0.380661	0.391689	0.369745	0.425303	33
3441	rpoE	b2573	575	0.306067	64.3789	210.342	0.312043	0.383026	110.386	0.496763	0.529196	0.460473	0.475398	0.516624	0.502446	0.491096	0.492865	2015
3444	yfiD	b2579	383	2.78847	1106.76	396.905	0.225051	0.336162	17.4463	0.390959	0.388079	0.382604	0.42764	0.432885	0.429763	0.429671	0.377427	1042
3445	yfiF	b2581	1037	1.2842	373.063	290.502	0.287215	0.405526	39.9048	0.451397	0.443336	0.458736	0.348539	0.305993	0.428325	0.367947	0.457371	5920
3446	kgtP	b2587	1298	0.735299	375.235	510.316	0.267366	0.33822	78.0016	0.502879	0.452171	0.46591	0.278266	0.310303	0.350755	0.319696	0.498877	5854
3452	rplS	b2606	347	1.84086	14887.6	8087.28	0.227084	0.320461	754.811	0.498178	0.460681	0.52686	0.331289	0.4002	0.38796	0.391278	0.518499	42
3453	trmD	b2607	767	0.0166636	139.544	8374.16	0.216225	0.396375	608.369	0.551937	0.534857	0.564558	0.431094	0.45577	0.452654	0.451722	0.557534	31
3454	rimM	b2608	548	0.0539117	523.464	9709.67	0.205145	0.376569	733.717	0.535413	0.580679	0.480015	0.570642	0.571172	0.600043	0.555237	0.523933	19
3455	rpsP	b2609	248	1.4544	13743.6	9449.68	0.1682	0.345645	776.594	0.458595	0.410813	0.484236	0.323824	0.366109	0.37396	0.347559	0.478351	249
3456	ffh	b2610	1361	0.856053	335.795	392.26	0.251597	0.379897	20.3716	0.47241	0.450835	0.48467	0.35239	0.359903	0.411676	0.376834	0.476037	2320
3457	grpE	b2614	593	2.48124	2575.92	1038.16	0.220047	0.329207	60.2979	0.444348	0.417911	0.46175	0.291349	0.262306	0.343692	0.295026	0.460265	3300
3459	yfjG	b2619	476	1.22614	230.73	188.176	0.345861	0.332353	17.8166	0.420335	0.414728	0.42409	0.714815	0.564791	0.457128	0.662354	0.40073	2880
3478	csrA	b2696	185	1.90783	1912.77	1002.59	0.199537	0.299622	100.058	0.335606	0.347782	0.325027	0.293633	0.39216	0.350572	0.355074	0.314448	235
3479	alaS	b2697	2630	0.931712	730.452	783.989	0.22372	0.385274	21.3318	0.583612	0.454659	0.593686	0.285537	0.318701	0.399617	0.308483	0.588452	128
3481	recA	b2699	1061	1.58155	721.37	456.117	0.21205	0.377747	50.9167	0.420894	0.455556	0.374836	0.399821	0.386536	0.389471	0.41496	0.415482	80
3499	rpoS	b2741	992	0.49328	199.043	403.509	0.270949	0.369244	43.3749	0.481029	0.467347	0.491902	0.305094	0.30061	0.284324	0.306509	0.490744	63
3506	ftsB	b2748	311	0.160464	50.7704	316.397	0.284647	0.356752	40.0851	0.498485	0.48617	0.442345	0.476641	0.506553	0.504443	0.517442	0.444873	194
3528	eno	b2779	1298	1.89671	4054.85	2137.83	0.183928	0.341317	30.0244	0.410118	0.3809	0.436298	0.26641	0.294426	0.353136	0.296684	0.414642	88
3529	pyrG	b2780	1637	1.30732	1021.52	781.386	0.201419	0.366316	15.648	0.499979	0.547625	0.438392	0.348692	0.381722	0.442343	0.356028	0.464778	228
3562	rppH	b2830	530	0.393929	88.098	223.639	0.331281	0.324698	27.8004	0.448819	0.488439	0.407938	0.512	0.591943	0.580005	0.577624	0.430254	353
3588	prfB	b2891	1022	1.07736	882.427	819.067	0.213023	0.368395	16.0755	0.288511	0.288511	0.439301	0.275965	0.288511	0.288511	0.275965	0.470594	167
3593	ygfY	b2897	266	1.5785	254.181	161.027	0.335791	0.286278	27.8565	0.344638	0.288495	0.388443	0.304175	0.302813	0.276586	0.303221	0.353555	1419
3598	gcvH	b2904	389	2.37242	391.532	165.035	0.295139	0.32964	16.9694	0.438382	0.429747	0.445711	0.322027	0.367742	0.411905	0.372656	0.451468	24
3605	rpiA	b2914	659	1.31102	588.219	448.673	0.235649	0.345751	15.4603	0.415428	0.369861	0.459386	0.39626	0.298025	0.346158	0.383252	0.426473	53
3610	mscS	b2924	860	0.611208	224.434	367.197	0.258462	0.358884	31.8424	0.400518	0.382457	0.41114	0.268801	0.313959	0.34739	0.307416	0.405929	358
3622	speA	b2938	1976	0.976821	749.257	767.036	0.221335	0.400369	21.1541	0.421972	0.418266	0.424398	0.45535	0.47545	0.437632	0.458449	0.419361	9
3629	yggL	b2959	326	1.20032	611.09	509.107	0.238705	0.31684	44.0808	0.428026	0.418435	0.43683	0.32376	0.394389	0.415068	0.372088	0.431652	0
3630	trmI	b2960	719	1.02227	296.566	290.105	0.269379	0.388456	28.5942	0.445212	0.45369	0.43426	0.425424	0.448652	0.480335	0.445147	0.444621	4168
3661	yqhA	b3002	494	0.936447	120.142	128.295	0.277443	0.319453	38.2258	0.414567	0.387701	0.411836	0.493513	0.344124	0.329508	0.476403	0.419103	1347
3681	ribB	b3041	653	1.39108	331.381	238.218	0.304582	0.354686	32.0689	0.40662	0.406988	0.398738	0.370042	0.372984	0.410415	0.382546	0.408348	7273
3686	bacA	b3057	821	0.620783	81.2035	130.808	0.326544	0.388745	20.0114	0.463366	0.456974	0.465205	0.324584	0.349437	0.39374	0.323428	0.470586	90
3701	yhaM	b4470	1310	0.97382	123.959	127.292	0.441942	0.416863	16.8735	0.457312	0.443524	0.469182	0.296448	0.389289	0.381499	0.358824	0.460145	28
3722	deaD	b3162	1889	0.988015	777.626	787.059	0.223359	0.40189	79.3167	0.453989	0.439871	0.464338	0.344865	0.451842	0.424247	0.393581	0.45303	180
3723	nlpI	b3163	884	0.0661645	54.6583	826.098	0.272634	0.376776	164.094	0.558045	0.612612	0.492529	0.456633	0.447635	0.4395	0.483498	0.546971	109
3724	pnp	b3164	2135	1.21383	1303.08	1073.53	0.207779	0.375171	70.4093	0.445126	0.412771	0.442158	0.198082	0.277778	0.330833	0.234996	0.447888	247
3725	rpsO	b3165	269	1.51373	12388.4	8183.97	0.171218	0.312342	833.129	0.376446	0.35432	0.390049	0.258561	0.276798	0.347497	0.275068	0.395259	149
3726	truB	b3166	944	0.368145	132.158	358.984	0.223085	0.383019	28.7311	0.442871	0.44146	0.443475	0.502178	0.520241	0.536506	0.538278	0.433597	0
3727	rbfA	b3167	401	1.55187	795.956	512.9	0.231827	0.347357	54.9731	0.428329	0.383593	0.471455	0.336921	0.309128	0.350763	0.308047	0.445591	164
3728	infB	b3168	2672	1.0225	1500.22	1467.2	0.194185	0.3721	110.009	0.438615	0.439586	0.436957	0.376716	0.450607	0.468825	0.424887	0.436919	25
3729	nusA	b3169	1487	0.970222	1050.05	1082.28	0.207037	0.366369	147.544	0.470656	0.444271	0.4976	0.325152	0.324553	0.393497	0.329963	0.475884	28
3732	secG	b3175	332	0.379696	1081.07	2847.2	0.217941	0.32259	442.98	0.453089	0.432683	0.454145	0.370156	0.406529	0.442521	0.392506	0.455442	228
3733	glmM	b3176	1337	1.16737	479.072	410.384	0.230127	0.388422	18.0894	0.417162	0.423385	0.410311	0.34329	0.411346	0.437037	0.376902	0.416359	-7
3737	greA	b3181	476	1.21033	502.233	414.955	0.250664	0.329286	54.0179	0.376182	0.390479	0.357013	0.23718	0.240752	0.33705	0.243999	0.393763	1867
3738	obgE	b3183	1172	0.906242	400.348	441.768	0.256041	0.377073	52.2476	0.44468	0.466151	0.414013	0.355869	0.380547	0.46082	0.369038	0.442796	16
3739	yhbE	b3184	965	0.0521401	18.7922	360.417	0.287532	0.412259	59.1432	0.507305	0.500036	0.496998	0.494017	0.499616	0.506573	0.521981	0.505127	127
3740	rpmA	b3185	257	1.38595	14347.3	10351.9	0.216075	0.327665	846.474	0.411273	0.392727	0.421643	0.324924	0.348083	0.349974	0.359556	0.429488	21
3741	rplU	b3186	311	1.26048	15964.7	12665.5	0.19325	0.340611	1026.79	0.42363	0.368913	0.474094	0.331328	0.320521	0.329342	0.3301	0.435854	1784
3760	sspB	b3228	497	0.252609	243.662	964.583	0.20917	0.390563	53.4103	0.454634	0.460079	0.441613	0.334781	0.312868	0.435848	0.3495	0.46999	6
3761	sspA	b3229	638	0.955615	880.022	920.896	0.194457	0.371113	70.0722	0.416041	0.414314	0.415826	0.328334	0.448968	0.445774	0.398689	0.403904	395
3762	rpsI	b3230	392	1.22408	19319.9	15783.3	0.171155	0.333444	1335.84	0.431934	0.459616	0.390041	0.315272	0.334199	0.396855	0.334997	0.441016	16
3763	rplM	b3231	428	1.28297	16227.6	12648.5	0.188075	0.323855	1108.66	0.460316	0.448668	0.469539	0.391668	0.399313	0.418478	0.390719	0.466158	219
3765	mdh	b3236	938	1.33201	702.469	527.374	0.220928	0.367058	43.8867	0.405374	0.42652	0.374706	0.43489	0.451709	0.357266	0.415097	0.401258	1589
3776	mreB	b3251	1043	1.42283	885.615	622.434	0.224849	0.382272	39.426	0.44023	0.443618	0.418687	0.305052	0.381975	0.351006	0.358788	0.442582	305
3783	smg	b3284	473	0.121959	25.4388	208.585	0.304531	0.310444	27.1194	0.418472	0.384853	0.452181	0.434996	0.417541	0.378109	0.439473	0.417561	-28
3788	rplQ	b3294	383	0.858176	15536.4	18104	0.166723	0.383264	1298.11	0.499012	0.382442	0.586042	0.276375	0.362102	0.348031	0.334075	0.522421	41
3789	rpoA	b3295	989	0.200964	3797	18894	0.202937	0.374297	1317.47	0.488117	0.491878	0.483694	0.376986	0.459342	0.469514	0.392261	0.488465	26
3790	rpsD	b3296	620	0.648855	12156.3	18735.1	0.200891	0.3585	1342.46	0.463225	0.425599	0.497624	0.431578	0.380355	0.421951	0.418502	0.467069	34
3791	rpsK	b3297	389	0.459831	8020.37	17442	0.207296	0.336221	1411.91	0.5115	0.519375	0.501657	0.444853	0.517883	0.513607	0.482807	0.506355	17
3792	rpsM	b3298	356	0.661712	11578.8	17498.2	0.1909	0.359522	1394.87	0.494338	0.457973	0.527649	0.28646	0.408497	0.465169	0.382227	0.511887	147
3794	secY	b3300	1331	0.0379929	506.527	13332.2	0.235293	0.385823	1245.72	0.505592	0.55845	0.426187	0.402832	0.530979	0.569383	0.476508	0.502071	8
3795	rplO	b3301	434	0.598311	9738.24	16276.2	0.166836	0.362903	1436.45	0.459555	0.504657	0.415483	0.422081	0.443091	0.498653	0.426276	0.458596	4
3796	rpmD	b3302	179	0.785346	12982.9	16531.5	0.206263	0.323743	1300.24	0.455454	0.452876	0.450236	0.379966	0.418649	0.452613	0.426803	0.478316	4
3797	rpsE	b3303	503	0.655981	9323.73	14213.4	0.206856	0.352107	1314.35	0.475659	0.483608	0.464854	0.346987	0.397718	0.447356	0.383402	0.484377	15
3798	rplR	b3304	353	0.823301	10703.5	13000.8	0.183595	0.353088	1303.06	0.453191	0.490222	0.411227	0.377715	0.388868	0.430691	0.384217	0.463388	10
3799	rplF	b3305	533	0.768961	13355.9	17368.8	0.195065	0.365403	1266.65	0.482072	0.450507	0.510255	0.486456	0.535708	0.460874	0.482517	0.472344	13
3800	rpsH	b3306	392	0.74071	9383.05	12667.6	0.223428	0.347908	1206.21	0.44168	0.445054	0.433963	0.440146	0.485283	0.461248	0.454905	0.42856	34
3801	rpsN	b3307	305	0.723981	10324.9	14261.3	0.189397	0.361443	1446.36	0.475684	0.43939	0.510585	0.312001	0.348852	0.352333	0.338501	0.492181	15
3802	rplE	b3308	539	0.470216	7678.56	16329.8	0.202571	0.336512	1763.48	0.450169	0.413783	0.488908	0.273998	0.292842	0.366198	0.295189	0.468303	15
3803	rplX	b3309	314	0.516317	8456.15	16377.8	0.174829	0.324459	1841.19	0.492695	0.490206	0.488686	0.464583	0.41225	0.479066	0.418668	0.503861	11
3804	rplN	b3310	371	0.454672	7948.86	17482.6	0.20994	0.369245	1766.24	0.486712	0.496245	0.469012	0.355338	0.432311	0.495582	0.379407	0.495929	165
3805	rpsQ	b3311	254	0.839225	14251.7	16982	0.193232	0.34185	1391.17	0.428604	0.401645	0.456086	0.251829	0.371328	0.41372	0.348696	0.443399	0
3806	rpmC	b3312	191	0.485999	8793.6	18093.9	0.176368	0.338796	1164.22	0.381696	0.392917	0.36625	0.267979	0.333815	0.396343	0.304064	0.402418	0
3807	rplP	b3313	410	0.761876	11511	15108.7	0.173457	0.355024	1092.69	0.433797	0.42438	0.438556	0.282911	0.351753	0.40262	0.345163	0.450015	13
3808	rpsC	b3314	701	0.712948	11275.7	15815.5	0.18749	0.370913	1310.87	0.501689	0.475074	0.511596	0.346565	0.34698	0.428887	0.35417	0.509349	18
3809	rplV	b3315	332	0.61686	10412	16879.1	0.17672	0.31503	1369.62	0.470205	0.427645	0.503758	0.410338	0.385329	0.423017	0.408116	0.480803	15
3810	rpsS	b3316	278	0.778274	12241.8	15729.4	0.190213	0.311439	1209.7	0.40412	0.42915	0.376628	0.396609	0.404856	0.429906	0.396723	0.400837	17
3811	rplB	b3317	821	0.853875	11836.7	13862.3	0.18675	0.378063	1202.01	0.489322	0.454932	0.525859	0.299573	0.385294	0.366863	0.341971	0.493997	18
3812	rplW	b3318	302	0.584874	8915.95	15244.2	0.188459	0.308477	1133.01	0.443826	0.435087	0.451563	0.404112	0.442938	0.45111	0.426186	0.442331	-3
3813	rplD	b3319	605	0.655671	10921.1	16656.3	0.159984	0.34795	1396.7	0.462113	0.480077	0.44337	0.409048	0.490227	0.500984	0.47544	0.458543	11
3814	rplC	b3320	629	0.73237	11630	15880	0.201108	0.356884	1296.41	0.462066	0.457064	0.461251	0.471184	0.498465	0.432199	0.492489	0.45255	33
3815	rpsJ	b3321	311	0.751105	13810.4	18386.8	0.164714	0.34045	1428.41	0.411466	0.350549	0.471284	0.3185	0.347504	0.373706	0.34939	0.426842	238
3821	tufA	b3339	1184	1.38703	13937	10048.1	0.276048	0.357492	59.497	0.952659	0.931832	0.969083	0.55916	0.59863	0.737569	0.565305	0.966766	71
3822	fusA	b3340	2114	0.472573	6340.75	13417.5	0.17786	0.36982	721.354	0.458516	0.450395	0.465951	0.34806	0.447848	0.400588	0.385405	0.457205	28
3823	rpsG	b3341	539	1.37267	12148.1	8849.98	0.17983	0.347217	755.953	0.491703	0.483204	0.497187	0.356493	0.347475	0.363227	0.363389	0.501438	97
3824	rpsL	b3342	374	1.05875	12181.8	11505.8	0.185892	0.363449	817.371	0.496157	0.47759	0.511878	0.357867	0.427727	0.475341	0.389574	0.508787	126
3829	fkpA	b3347	812	1.60282	882.228	550.424	0.211946	0.325394	34.894	0.446003	0.433504	0.451124	0.386098	0.338017	0.361183	0.357835	0.453042	488
3830	slyD	b3349	590	1.05166	2080.16	1977.98	0.204062	0.387305	125.276	0.440994	0.417404	0.457545	0.474828	0.391045	0.385706	0.439657	0.4446	95
3853	aroB	b3389	1088	0.142633	87.9767	616.804	0.271508	0.401388	17.7866	0.510484	0.474601	0.517755	0.406698	0.386673	0.37137	0.415755	0.51256	57
3854	aroK	b3390	521	1.00479	1157.12	1151.6	0.232085	0.330518	38.6606	0.459197	0.455258	0.444102	0.383321	0.392741	0.405478	0.382758	0.462628	401
3860	nudE	b3397	560	0.618535	116.346	188.099	0.32798	0.364375	27.5405	0.432684	0.392146	0.459991	0.391393	0.362752	0.398792	0.427397	0.436369	4566
3871	glpE	b3425	326	0.932333	119.638	128.321	0.319531	0.347853	22.6431	0.411093	0.398354	0.416463	0.389054	0.364594	0.389457	0.336583	0.41638	1898
3896	rpoH	b3461	854	0.67027	353.212	526.97	0.25232	0.391956	118.708	0.468077	0.463099	0.470752	0.340695	0.416382	0.432095	0.402191	0.470171	245
3944	yiaF	b3554	710	1.0002	431.821	431.733	0.22644	0.345507	26.1542	0.392058	0.412222	0.372043	0.364298	0.400762	0.409407	0.353915	0.391245	1401
3954	bax	b3570	824	0.559557	72.9946	130.451	0.365024	0.341481	21.3245	0.527253	0.549559	0.486203	0.390744	0.530472	0.562102	0.508626	0.511422	3932
3968	yibT	b4554	209	1.1301	79.1785	70.0632	0.37585	0.298852	16.2556	0.353684	0.380855	0.323226	0.300197	0.286442	0.388118	0.31399	0.365881	5361
3971	secB	b3609	467	2.11243	1983.52	938.975	0.185512	0.328758	71.8653	0.396284	0.389098	0.398812	0.173774	0.226226	0.241122	0.2143	0.412107	63
3972	grxC	b3610	251	0.889901	596.027	669.767	0.212969	0.313865	58.9459	0.443312	0.404274	0.429036	0.294608	0.392576	0.391558	0.345183	0.441848	142
3973	yibN	b3611	431	0.872079	612.932	702.84	0.229515	0.366009	72.0498	0.432712	0.453799	0.409987	0.390299	0.412526	0.509338	0.441939	0.435205	4032
3975	tdh	b3616	1025	0.88225	267.363	303.047	0.263203	0.366302	25.5904	0.423568	0.428382	0.415639	0.445778	0.46762	0.47117	0.489173	0.415663	10
3976	kbl	b3617	1196	0.87093	247.408	284.074	0.278686	0.375711	18.2099	0.439738	0.426178	0.452283	0.368543	0.321812	0.335787	0.363382	0.446005	275
3989	rpmG	b3636	167	0.891259	7654.82	8588.78	0.210952	0.24515	1069.06	0.425308	0.429934	0.410751	0.443971	0.442173	0.444506	0.464531	0.388288	21
3990	rpmB	b3637	236	1.58279	19067.1	12046.5	0.199491	0.346059	915.135	0.36363	0.368484	0.356152	0.291932	0.368175	0.334526	0.335215	0.35679	217
3993	rph	b3643	686	1.39588	387.394	277.527	0.239929	0.386691	30.8295	0.47273	0.482914	0.44028	0.447494	0.472501	0.446425	0.462833	0.468077	2939
4030	dnaA	b3702	1403	0.361721	104.651	289.314	0.292699	0.37779	18.2009	0.494459	0.468153	0.449955	0.332421	0.437692	0.382408	0.420323	0.491622	11543
4044	glmU	b3730	1370	0.637746	387.116	607.006	0.238008	0.366635	19.0738	0.483932	0.46307	0.451404	0.537715	0.477584	0.493603	0.541891	0.477292	353
4045	atpC	b3731	419	0.290386	1093.48	3765.6	0.197693	0.38969	243.041	0.475732	0.471351	0.471201	0.44252	0.514541	0.486298	0.508361	0.465369	21
4046	atpD	b3732	1382	0.684969	2296.39	3352.55	0.182922	0.384653	179.922	0.441859	0.460781	0.423326	0.452447	0.490763	0.532845	0.478744	0.438507	27
4047	atpG	b3733	863	0.324838	865.096	2663.16	0.186469	0.394403	129.85	0.480364	0.492104	0.466548	0.275069	0.289682	0.359703	0.297389	0.493915	51
4048	atpA	b3734	1541	0.752104	2750.31	3656.82	0.189307	0.380785	131.978	0.458231	0.458561	0.455035	0.27766	0.309695	0.344027	0.309151	0.464229	13
4049	atpH	b3735	533	0.190202	736.299	3871.14	0.193806	0.385535	161.657	0.463086	0.474164	0.442748	0.376074	0.398306	0.429995	0.384007	0.470749	15
4050	atpF	b3736	470	0.228245	1173.6	5141.84	0.181447	0.358128	197.644	0.508851	0.534873	0.479118	0.409421	0.44531	0.52352	0.429241	0.512951	62
4051	atpE	b3737	239	1.79639	7167.81	3990.13	0.166157	0.365063	143.19	0.418852	0.468806	0.341188	0.353635	0.42344	0.475121	0.374568	0.382559	47
4052	atpB	b3738	815	0.426339	747.934	1754.32	0.251835	0.357104	118.429	0.481785	0.472475	0.490015	0.317257	0.430641	0.432599	0.401167	0.485289	9
4053	atpI	b3739	380	0.0189398	11.9586	631.404	0.332637	0.387553	96.9744	0.49315	0.508035	0.475946	0.312911	0.372691	0.452911	0.346583	0.491725	617
4056	mioC	b3742	443	0.783819	248.097	316.524	0.273831	0.315643	47.4106	0.446768	0.48501	0.394418	0.574862	0.49211	0.474858	0.533767	0.438373	90
4065	ppiC	b3775	281	2.78728	559.486	200.728	0.269625	0.320712	28.373	0.390669	0.335041	0.44101	0.310341	0.281575	0.309774	0.324156	0.420292	438
4080	yigI	b3820	467	1.83092	155.015	84.6651	0.332025	0.354561	32.6598	0.416146	0.390229	0.430013	0.423879	0.349209	0.349961	0.397348	0.419643	3742
4090	yihA	b3865	632	1.31143	323.36	246.57	0.291548	0.366503	20.466	0.445224	0.426079	0.465036	0.379002	0.42763	0.435968	0.440841	0.446402	3104
4123	rraA	b3929	485	0.564533	232.398	411.663	0.272715	0.381237	42.0066	0.468352	0.456278	0.477091	0.453247	0.391476	0.468178	0.454874	0.478604	93
4131	metJ	b3938	317	1.74537	1146.84	657.078	0.240446	0.327823	20.2083	0.439564	0.417693	0.455572	0.365525	0.384962	0.402375	0.391504	0.439768	8645
4141	trmA	b3965	1100	1.15225	182.089	158.029	0.317306	0.3522	16.2876	0.485284	0.479688	0.464861	0.445929	0.400952	0.462356	0.437246	0.489566	10806
4169	yjcB	b4060	281	0.841168	32.8631	39.0685	0.406767	0.33274	52.3968	0.355225	0.337272	0.349192	0.353008	0.327482	0.325161	0.344757	0.345108	2019
4170	soxS	b4062	323	5.94827	115.656	19.4436	0.418132	0.295077	22.3265	0.358928	0.264387	0.434966	0.295018	0.268027	0.242149	0.279627	0.380479	4400
4204	yjdM	b4108	335	7.86364	476.543	60.6009	0.306026	0.255642	22.4706	0.385854	0.392703	0.372006	0.247688	0.280595	0.356882	0.268705	0.378552	5447
4240	rsgA	b4161	1052	0.722843	145.256	200.951	0.291295	0.378175	17.2366	0.471526	0.442019	0.469879	0.359703	0.378908	0.365152	0.364539	0.478233	1419
4256	ppa	b4226	530	1.85231	4716.77	2546.43	0.178914	0.301057	78.6766	0.386096	0.341764	0.423083	0.272831	0.298747	0.33193	0.272538	0.393531	4959
4258	yjgA	b4234	551	0.607163	245.857	404.928	0.233711	0.342178	48.2625	0.457467	0.463924	0.447161	0.452441	0.407486	0.426763	0.445916	0.455549	2035
4264	yjgF	b4243	386	2.29641	1554.75	677.035	0.185341	0.316373	51.7423	0.354956	0.362656	0.336591	0.316888	0.254198	0.340006	0.315567	0.369098	73
4274	pepA	b4260	1511	0.785581	273.74	348.456	0.267865	0.406585	21.9804	0.456983	0.426307	0.478395	0.314108	0.352976	0.353541	0.363733	0.458919	2610
4353	arcA	b4401	716	0.976942	548.289	561.23	0.23319	0.342025	72.8544	0.443676	0.43709	0.447509	0.199139	0.287486	0.390999	0.265169	0.456073	NA
