# Supplementary material for: Operon mRNAs are organized into ORF-centric structures that predict translation efficiency
Source: eLife journal article supplement (doi:10.7554/elife.22037), 2017-01-31
Supplement: supp [file elife-22037-supp-v1.zip › elife_poa_e22037_Supplementary_File_4.xlsx]

## Sheet: Sheet1
Supplementary File 4: Data summary of common ORFs among datasets (N = 421)
ID	ID number set by authors indicating gene location on chromosome
Gene	Gene name
bNums	b number
Length	ORF length from the first base of start codon to the last base of stop codon
TE	Translation efficiency of the ORF (average ribosome density/mRNA abundance)
Ribosome	Average ribosome density of the ORF (see materials and methods for definition)
mRNA	mRNA abundance of the ORF (see materials and methods for definition)
Gini_mRNA	Gini calculated from WT mRNA-seq signals of the ORF (to eliminate ORFs with intragenic promoters)
-ΔG/nt	- mRNA free energy per nucleotide calculated from ViennaRNA
Mean_DMS_vivo	Mean of in vivo WT DMS-seq signals of the ORF
Gini_vivo	Gini of the full-length ORF calculated from DMS-seq of in vivo WT cells
Gini_vivo_1	Gini of the first half of the ORF calculated from DMS-seq of in vivo WT cells
Gini_vivo_2	Gini of the second half of the ORF calculated from DMS-seq of in vivo WT cells
Gini_vivo_-20:40	Gini calculated from WT in vivo DMS-seq signals in the region from 20nt upstream to 40nt downstream of ORF start codon
Gini_vivo_0:60	Gini calculated from WT in vivo DMS-seq signals in the region from the first base of start codon to 60nt downstream
Gini_vivo_0:100	Gini calculated from WT in vivo DMS-seq signals in the region from the first base of start codon to 100nt downstream
Gini_vivo_head	Gini calculated from WT in vivo DMS-seq signals in the region from the 20nt upstream to 60nt downstream of start codon
Gini_vivo_body	Gini calculated from WT in vivo DMS-seq signals in the region from 60nt downstream of start codon to the stop codon of ORF
Mean_DMS_vitro	Mean of in vitro DMS-seq signals of the ORF
Gini_vitro	Gini of the full-length ORF calculated from in vitro DMS-seq
Gini_vitro_1	Gini of the first half of the ORF calculated from in vitro DMS-seq
Gini_vitro_2	Gini of the second half of the ORF calculated from in vitro DMS-seq
Gini_vitro_-20:40	Gini calculated from in vitro DMS-seq signals in the region from 20nt upstream to 40nt downstream of ORF start codon
Gini_vitro_0:60	Gini calculated from in vitro DMS-seq signals in the region from the first base of start codon to 60nt downstream
Gini_vitro_0:100	Gini calculated from in vitro DMS-seq signals in the region from the first base of start codon to 100nt downstream
Gini_vitro_head	Gini calculated from in vitro DMS-seq signals in the region from the 20nt upstream to 60nt downstream of start codon
Gini_vitro_body	Gini calculated from in vitro DMS-seq signals in the region from 60nt downstream of start codon to the stop codon of ORF
Mean_DMS_ksg	Mean of ksg-treated DMS-seq signals of the ORF
Gini_ksg	Gini of the full-length ORF calculated from ksg-treated in vivo DMS-seq
Gini_ksg_1	Gini of the first half of the ORF calculated from ksg-treated in vivo DMS-seq
Gini_ksg_2	Gini of the second half of the ORF calculated from ksg-treated in vivo DMS-seq
Gini_ksg_-20:40	Gini calculated from ksg-treated in vivo DMS-seq signals in the region from 20nt upstream to 40nt downstream of ORF start codon
Gini_ksg_0:60	Gini calculated from ksg-treated in vivo DMS-seq signals in the region from the first base of start codon to 60nt downstream
Gini_ksg_0:100	Gini calculated from ksg-treated in vivo DMS-seq signals in the region from the first base of start codon to 100nt downstream
Gini_ksg_head	Gini calculated from ksg-treated in vivo DMS-seq signals in the region from the 20nt upstream to 60nt downstream of start codon
Gini_ksg_body	Gini calculated from ksg-treated in vivo DMS-seq signals in the region from 60nt downstream of start codon to the stop codon of ORF
tAI	tRNA adaptation index of the gene (Tuller et al., 2010; dos Reis et al., 2004)
Boel_multiple	Codon influence of the ORF calculated from the multiple parameter regression model in (Boel et al, 2016)
aSD	Strength of Shine-Dalgarno sequence (Salis et al., 2009)
ORF_distance	Distance (nt) between the first base of start codon and the last base of the upstream stop codon
ORF selection criteria for common dataset:
1. Mean_DMS_vivo ≥ 15
2. Mean_DMS_vitro ≥ 15
3. Mean_DMS_ksg ≥ 15
4. Length ≥ 150
5. Gini_mRNA < 0.45 (to select genes with relatively constant mRNA level across ORFs, i.e. without internal promoters or terminators)
ID	Gene	bNums	Length	TE	Ribosome	mRNA	Gini_mRNA	-ΔG/nt	Mean_DMS_vivo	Gini_vivo	Gini_vivo_1	Gini_vivo_2	Gini_vivo_-20:40	Gini_vivo_0:60	Gini_vivo_0:100	Gini_vivo_head	Gini_vivo_body	Mean_DMS_vitro	Gini_vitro	Gini_vitro_1	Gini_vitro_2	Gini_vitro_-20:40	Gini_vitro_0:60	Gini_vitro_0:100	Gini_vitro_head	Gini_vitro_body	Mean_DMS_ksg	Gini_ksg	Gini_ksg_1	Gini_ksg_2	Gini_ksg_-20:40	Gini_ksg_0:60	Gini_ksg_0:100	Gini_ksg_head	Gini_ksg_body	tAI	Boel_multiple	aSD	ORF_distance
6	talB	b0008	953	2.53224	1397.74	551.98	0.186955	0.361658	186.737	0.388929	0.371529	0.407163	0.346979	0.32744	0.359386	0.333573	0.390926	60.6277	0.499731	0.465924	0.532947	0.385295	0.389156	0.4226	0.359361	0.503489	18.2219	0.409751	0.388089	0.42896	0.274087	0.305742	0.328199	0.279523	0.413963	0.277938	4.31626	-3.48135	2708
8	dnaK	b0014	1916	1.86346	4612.68	2475.33	0.18917	0.345945	377.208	0.396253	0.40355	0.388325	0.356824	0.365724	0.38166	0.350371	0.396042	165.725	0.518121	0.527522	0.508467	0.467115	0.462673	0.472529	0.451203	0.517572	30.8082	0.462868	0.47807	0.443048	0.417019	0.390508	0.412712	0.409337	0.461514	0.288343	5.3688	-6.18135	2270
14	ribF	b0025	941	0.327865	82.1628	250.6	0.266853	0.387226	42.5743	0.509575	0.444662	0.554672	0.476693	0.397854	0.459217	0.452751	0.515825	21.1393	0.536017	0.515048	0.555765	0.575177	0.459637	0.496595	0.535875	0.540241	26.4254	0.478544	0.416362	0.524595	0.533312	0.449994	0.438953	0.503028	0.476657	0.229648	3.77156	-2.88135	8
15	ileS	b0026	2816	1.09723	581.498	529.969	0.236226	0.405653	51.8782	0.44404	0.435819	0.452364	0.314053	0.38773	0.402932	0.354142	0.444052	32.3186	0.543802	0.530927	0.553932	0.505924	0.545893	0.519547	0.527793	0.543164	23.1808	0.487087	0.471785	0.468158	0.282539	0.379508	0.385251	0.333016	0.483821	0.263251	4.33758	-2.88135	43
16	lspA	b0027	494	0.185374	94.3168	508.793	0.243507	0.41251	39.1717	0.468396	0.495425	0.441769	0.387909	0.469728	0.516894	0.435026	0.459715	23.0753	0.532199	0.507578	0.548348	0.398403	0.446116	0.507896	0.439884	0.539054	19.6366	0.441443	0.455682	0.418494	0.343943	0.405918	0.478348	0.374412	0.435222	0.237146	2.06027	-2.18135	0
43	mraZ	b0081	458	0.0935944	35.0411	374.393	0.272041	0.350087	52.1678	0.535082	0.533499	0.535058	0.427278	0.455367	0.509117	0.475775	0.548226	28.3427	0.562902	0.553941	0.569653	0.490829	0.45113	0.522005	0.541273	0.57709	59.324	0.531968	0.535731	0.524121	0.425914	0.487103	0.501921	0.47672	0.539148	0.20442	3.27968	-9.98135	602
45	ftsL	b0083	365	0.274571	66.0096	240.41	0.382244	0.367205	35.1366	0.554777	0.607778	0.426099	0.438962	0.505935	0.540634	0.493272	0.500693	15.6905	0.605862	0.639737	0.521733	0.424843	0.521433	0.583333	0.514374	0.591897	17.5565	0.564024	0.57015	0.457614	0.46767	0.52718	0.545963	0.507135	0.539388	0.188534	4.44284	-7.28135	-3
54	ddlB	b0092	920	0.670499	120.624	179.902	0.29888	0.386141	31.2465	0.473075	0.48364	0.458374	0.468679	0.516286	0.526499	0.45623	0.470324	18.4276	0.56523	0.574114	0.553591	0.604586	0.586147	0.618069	0.574248	0.562445	15.7744	0.496373	0.492093	0.480976	0.536016	0.526941	0.507553	0.508824	0.493307	0.227386	4.46249	-9.48135	-7
55	ftsQ	b0093	830	0.169948	33.3552	196.267	0.317836	0.384988	28.1673	0.504416	0.506251	0.501436	0.369376	0.477074	0.532936	0.450654	0.50756	16.9463	0.578795	0.574477	0.58078	0.456783	0.532604	0.558292	0.519178	0.581292	16.8814	0.498436	0.49134	0.503378	0.360617	0.44101	0.478051	0.427622	0.504042	0.230202	3.93896	-4.98135	2
56	ftsA	b0094	1262	0.509704	158.766	311.487	0.319452	0.384842	41.3302	0.484734	0.456704	0.506716	0.311578	0.330208	0.401072	0.339516	0.490172	24.1987	0.555021	0.526208	0.571219	0.422349	0.366595	0.451573	0.430996	0.563387	20.4217	0.494177	0.495683	0.482819	0.365515	0.346756	0.399121	0.397191	0.500705	0.223907	4.35991	-3.98135	-3
57	ftsZ	b0095	1151	1.00171	630.035	628.962	0.239189	0.386273	81.8255	0.426483	0.414082	0.435064	0.371104	0.434939	0.457041	0.427827	0.425695	48.9412	0.51396	0.517313	0.506964	0.41341	0.575548	0.555916	0.487338	0.50992	44.0722	0.457628	0.443877	0.453079	0.364851	0.452704	0.476926	0.400173	0.455117	0.263312	5.00333	-6.18135	61
58	lpxC	b0096	917	0.449183	585.618	1303.74	0.227042	0.371134	209.328	0.486494	0.479664	0.478638	0.403904	0.448132	0.47858	0.431283	0.476198	92.1002	0.547816	0.540082	0.54961	0.492875	0.533526	0.544491	0.50453	0.543796	312.318	0.44748	0.426558	0.468195	0.436352	0.468416	0.462031	0.459622	0.442315	0.248794	4.19925	-2.88135	101
65	pdhR	b0113	764	0.413539	230.636	557.712	0.269866	0.374306	80.2196	0.511514	0.522113	0.465163	0.394062	0.438094	0.47193	0.407468	0.509205	46.6245	0.544884	0.533427	0.534932	0.415883	0.477423	0.510721	0.437378	0.542276	53.7823	0.568384	0.528708	0.474752	0.363263	0.414527	0.443693	0.377703	0.562465	0.223357	4.27291	-4.58135	1957
66	aceE	b0114	2663	1.10876	4408.44	3976	0.186644	0.365772	450.015	0.40802	0.38711	0.40544	0.278998	0.34825	0.35645	0.315367	0.408078	307.638	0.479875	0.475733	0.481952	0.366934	0.452697	0.423654	0.400417	0.480238	91.1105	0.422327	0.430824	0.396685	0.250678	0.300095	0.325601	0.275218	0.422916	0.280996	4.2397	-7.38135	161
67	aceF	b0115	1892	1.12971	3889.68	3443.07	0.204498	0.405338	323.064	0.462819	0.479611	0.444799	0.313839	0.397256	0.410573	0.360808	0.463941	269.805	0.527278	0.542632	0.509674	0.394931	0.440676	0.455128	0.420506	0.529785	119.653	0.493039	0.540953	0.416112	0.344712	0.410273	0.547612	0.39836	0.494383	0.27299	4.90173	-7.88135	15
68	lpd	b0116	1424	1.1803	3410.31	2889.37	0.212214	0.362444	407.933	0.414962	0.3976	0.430588	0.246134	0.324427	0.349803	0.291503	0.418487	239.3	0.484582	0.481735	0.487189	0.327399	0.390795	0.457188	0.347478	0.487904	135.97	0.414757	0.402095	0.417621	0.33115	0.2702	0.325649	0.316279	0.410938	0.284165	4.89762	-7.88135	325
69	acnB	b0118	2597	1.14278	690.914	604.592	0.221286	0.390697	66.8064	0.428985	0.420797	0.436968	0.39584	0.39844	0.39609	0.392046	0.428186	39.0397	0.522096	0.507513	0.537042	0.472844	0.483254	0.501391	0.477823	0.522411	26.9451	0.430851	0.415128	0.43951	0.33027	0.312197	0.33657	0.341	0.427208	0.269785	4.45161	-7.78135	2279
72	hpt	b0125	536	1.42947	678.866	474.906	0.246503	0.349328	115.994	0.393335	0.397645	0.385359	0.288872	0.353125	0.345369	0.331844	0.39995	49.8343	0.513196	0.548623	0.470059	0.444449	0.534305	0.523927	0.505088	0.510148	18.2367	0.399416	0.416739	0.378896	0.309394	0.402633	0.40072	0.362756	0.399958	0.282912	4.76272	-3.38135	2798
85	erpA	b0156	344	1.58121	1152.89	729.115	0.213936	0.300145	107.507	0.406126	0.370741	0.439931	0.356483	0.341364	0.356277	0.341075	0.417413	69.1714	0.517575	0.473554	0.556373	0.466976	0.483427	0.475796	0.480433	0.524106	64.7397	0.404596	0.392453	0.413471	0.349548	0.373177	0.375806	0.356054	0.409799	0.264736	5.40012	-6.18135	82
89	rpsB	b0169	725	1.4015	11884.2	8479.64	0.171052	0.338772	1621.06	0.406078	0.405055	0.405891	0.274307	0.336033	0.344561	0.319222	0.411222	773.218	0.516633	0.541681	0.487326	0.459568	0.505414	0.524339	0.462891	0.516096	807.816	0.464474	0.472244	0.452481	0.416232	0.444258	0.446739	0.405466	0.463984	0.280723	4.42103	-7.88135	6254
90	tsf	b0170	851	1.98158	9456.35	4772.14	0.192278	0.357544	1075.47	0.403099	0.394259	0.411249	0.313527	0.365123	0.357909	0.354435	0.404962	495.399	0.524431	0.528354	0.517815	0.4531	0.516451	0.511419	0.477467	0.523958	254.125	0.430903	0.425564	0.435325	0.33785	0.414572	0.407993	0.375031	0.431083	0.29593	5.07555	-6.18135	258
91	pyrH	b0171	725	0.842856	474.738	563.249	0.222984	0.367062	79.8347	0.443769	0.447361	0.440136	0.341207	0.403745	0.391389	0.366462	0.446807	56.694	0.501996	0.521976	0.482734	0.452346	0.494356	0.472252	0.458586	0.501681	21.4756	0.460359	0.482704	0.439197	0.455413	0.475427	0.447723	0.45212	0.457942	0.283112	4.28185	-5.18135	147
92	frr	b0172	557	1.25575	2257.84	1798.01	0.175653	0.336948	337.935	0.435636	0.406266	0.454517	0.349136	0.394593	0.374551	0.36698	0.437331	153.589	0.481546	0.477148	0.483121	0.370224	0.414728	0.41727	0.393568	0.486157	99.8845	0.467486	0.433776	0.496845	0.286741	0.354693	0.376006	0.315475	0.470474	0.303123	5.57106	-6.08135	292
94	ispU	b0174	761	0.314403	102.75	326.811	0.288292	0.360263	56.3163	0.481592	0.482283	0.471496	0.378126	0.470217	0.474791	0.434963	0.481989	32.6762	0.515617	0.506706	0.522802	0.435842	0.553831	0.542495	0.486706	0.510617	36.6243	0.44988	0.440073	0.456859	0.368259	0.485199	0.473418	0.439041	0.445	0.196756	3.93005	-5.78135	186
95	cdsA	b0175	857	0.206064	47.7656	231.8	0.295718	0.372964	33.3928	0.447747	0.453641	0.440619	0.310834	0.409288	0.496119	0.379012	0.449909	19.9928	0.501996	0.524271	0.480881	0.449001	0.501821	0.573967	0.481699	0.501086	26.1848	0.426813	0.434578	0.418584	0.361556	0.429056	0.477376	0.418732	0.425969	0.198912	1.88573	-10.2814	13
96	rseP	b0176	1352	0.144368	36.6954	254.179	0.361053	0.382944	37.8987	0.544293	0.478832	0.554334	0.408131	0.519312	0.498353	0.487324	0.543821	22.486	0.56977	0.537425	0.54391	0.504785	0.568186	0.515231	0.521899	0.567514	57.3938	0.556069	0.572418	0.484187	0.489635	0.55634	0.510921	0.526674	0.551836	0.209674	3.37958	-7.38135	12
97	bamA	b0177	2432	0.856574	396.135	462.464	0.25017	0.371209	71.2848	0.451278	0.449541	0.451443	0.388901	0.472342	0.512368	0.430475	0.450624	43.4831	0.518952	0.534807	0.500855	0.458523	0.469194	0.583425	0.48326	0.519702	47.0308	0.481292	0.471596	0.464768	0.325241	0.412022	0.520751	0.359001	0.481527	0.250478	4.72052	-5.18135	30
98	skp	b0178	485	1.50561	1987.37	1319.98	0.214214	0.358247	269.381	0.412311	0.397652	0.422753	0.25493	0.340477	0.343371	0.328524	0.419394	113.882	0.522596	0.522314	0.521488	0.466895	0.51989	0.498913	0.512689	0.518986	116.917	0.454931	0.457442	0.450288	0.40816	0.410534	0.394279	0.426718	0.457583	0.287137	4.30372	-9.98135	122
99	lpxD	b0179	1025	0.367283	378.136	1029.55	0.23648	0.379337	158.086	0.47984	0.48694	0.468483	0.365738	0.440451	0.539033	0.394754	0.480843	82.4076	0.519599	0.525143	0.511682	0.390387	0.483539	0.576028	0.422584	0.521271	60.5251	0.488361	0.484185	0.459153	0.320914	0.3931	0.517691	0.344318	0.48774	0.246206	3.66552	-3.28135	4
100	fabZ	b0180	455	1.52714	1413.13	925.344	0.209578	0.340286	222.857	0.401798	0.377712	0.420611	0.269246	0.360114	0.384048	0.343705	0.408363	100.573	0.532535	0.548418	0.514064	0.417193	0.481438	0.510777	0.498555	0.539794	73.9531	0.428232	0.405651	0.449114	0.293605	0.393091	0.387922	0.382799	0.433329	0.257905	4.16279	-5.18135	105
101	lpxA	b0181	788	0.185177	229.727	1240.58	0.202747	0.398858	163.013	0.552133	0.524191	0.574051	0.464546	0.545761	0.519704	0.52071	0.550653	80.6232	0.570338	0.541563	0.594752	0.530911	0.485658	0.497584	0.502831	0.575812	57.6495	0.491602	0.466343	0.505	0.461729	0.494514	0.449023	0.45523	0.48974	0.236679	4.47526	-9.48135	4
105	accA	b0185	959	0.917376	739.232	805.812	0.217046	0.360574	142.783	0.411092	0.399281	0.418101	0.313126	0.361828	0.416949	0.31704	0.413514	70.1828	0.508457	0.488305	0.52918	0.364068	0.39823	0.482689	0.35748	0.514888	28.9161	0.422316	0.395374	0.448417	0.267987	0.29545	0.39667	0.268007	0.429495	0.26912	4.83673	-3.28135	13
121	lpcA	b0222	578	1.16129	345.431	297.454	0.290031	0.348028	59.9275	0.402345	0.394695	0.407594	0.298578	0.314123	0.350789	0.329984	0.409143	26.3934	0.501399	0.508636	0.492058	0.460579	0.444813	0.456032	0.467172	0.507569	15.8324	0.42784	0.395904	0.456706	0.30534	0.314792	0.337534	0.323638	0.439629	0.257403	4.39333	-6.08135	2727
132	gpt	b0238	458	4.0032	1171.35	292.602	0.216887	0.341223	112.61	0.358566	0.337618	0.379793	0.269671	0.267005	0.291877	0.27733	0.371733	39.6946	0.496686	0.482958	0.510446	0.398002	0.440385	0.471924	0.417186	0.504863	19.8368	0.392466	0.382069	0.383435	0.322354	0.284055	0.321942	0.320627	0.39352	0.241577	4.79012	-3.58135	1772
134	crl	b0240	401	4.85432	974.835	200.818	0.224323	0.339676	79.2886	0.403824	0.387172	0.418788	0.363366	0.294002	0.320555	0.370756	0.422431	29.4167	0.538782	0.540943	0.534086	0.43941	0.403903	0.414027	0.478923	0.557457	49.1425	0.427682	0.425584	0.427444	0.376819	0.274673	0.344477	0.386556	0.445563	0.219582	4.654	-7.78135	58
216	tgt	b0406	1127	0.9195	645.403	701.906	0.260208	0.360453	141.918	0.451044	0.427753	0.448504	0.4343	0.472711	0.483051	0.471195	0.448792	72.3352	0.543851	0.509423	0.551819	0.454549	0.445536	0.456721	0.471287	0.546077	23.3379	0.465762	0.427936	0.465734	0.41653	0.384987	0.399489	0.415754	0.469663	0.235324	4.15501	-5.88135	56
217	yajC	b0407	332	1.98475	2518.16	1268.76	0.229588	0.32494	308.12	0.403604	0.408763	0.397815	0.217381	0.367562	0.397081	0.331159	0.407794	146.548	0.534829	0.583401	0.478773	0.326051	0.550786	0.607471	0.471835	0.527553	50.1221	0.478811	0.472577	0.483462	0.267404	0.450511	0.469686	0.405533	0.480724	0.289258	4.6024	-6.78135	23
219	secF	b0409	971	0.281891	162.286	575.703	0.234317	0.379269	88.4516	0.486391	0.472946	0.496409	0.3756	0.432107	0.441768	0.431703	0.48896	51.0531	0.56457	0.547182	0.579806	0.433972	0.488927	0.482753	0.488612	0.569717	18.2006	0.505556	0.511097	0.481608	0.359757	0.377084	0.422834	0.394591	0.508456	0.251998	3.34329	-10.0814	11
223	ribE	b0415	470	1.48997	692.981	465.096	0.278753	0.350787	94.9512	0.407917	0.408258	0.404679	0.362537	0.443997	0.379654	0.409759	0.402285	48.2222	0.524664	0.547506	0.485888	0.548293	0.597443	0.510728	0.574506	0.512502	27.1111	0.47128	0.416745	0.433751	0.399541	0.413354	0.385979	0.43785	0.474063	0.255099	4.95669	-3.48135	89
224	nusB	b0416	419	0.816379	495.85	607.377	0.20884	0.377446	107.183	0.451012	0.449434	0.450931	0.404636	0.419084	0.430592	0.410789	0.451055	53.5077	0.527701	0.525391	0.52591	0.435305	0.491096	0.484742	0.43656	0.53041	25.1256	0.486276	0.425159	0.505013	0.329804	0.357248	0.373013	0.336529	0.502723	0.282141	4.05014	-9.08135	20
228	yajQ	b0426	491	1.70498	1276.4	748.633	0.221586	0.340978	166.764	0.38112	0.395381	0.365683	0.446693	0.383684	0.413318	0.426899	0.379323	62.7619	0.560752	0.582231	0.536877	0.581847	0.55666	0.517053	0.5611	0.558998	83.9654	0.455466	0.45122	0.458525	0.489148	0.430314	0.421134	0.480041	0.456904	0.270665	5.0536	-8.38135	1686
230	tig	b0436	1298	1.85355	6246.28	3369.9	0.197738	0.350385	801.205	0.413395	0.412888	0.4073	0.322601	0.334059	0.366207	0.319676	0.414866	321.558	0.512198	0.52509	0.498379	0.381663	0.460643	0.483213	0.402335	0.513032	220.658	0.439854	0.453964	0.426112	0.355708	0.377852	0.410614	0.373309	0.441672	0.308089	5.87371	-7.88135	344
231	clpP	b0437	623	1.18638	615.161	518.519	0.227315	0.349117	85.4359	0.390149	0.393655	0.385131	0.297725	0.355242	0.397095	0.341389	0.386601	41.3131	0.487961	0.480301	0.49482	0.402261	0.436842	0.449422	0.442141	0.49022	39.4781	0.406792	0.425592	0.380683	0.299275	0.370365	0.362994	0.344384	0.404358	0.243882	4.00183	-7.78135	246
232	clpX	b0438	1274	0.63586	528.954	831.871	0.217794	0.379631	113.1	0.463989	0.463144	0.464033	0.293702	0.328631	0.388898	0.323032	0.469985	54.1108	0.549909	0.543489	0.556465	0.44156	0.496885	0.567402	0.460523	0.551527	54.2956	0.463905	0.461178	0.466272	0.286294	0.384019	0.436334	0.360177	0.467605	0.263841	5.15846	-7.88135	126
233	lon	b0439	2354	0.730581	548.193	750.352	0.236456	0.377889	102.778	0.468847	0.47911	0.455595	0.302624	0.380002	0.410182	0.343528	0.470318	50.4378	0.542097	0.556162	0.523764	0.438656	0.464408	0.539901	0.454928	0.543676	15.908	0.461863	0.485819	0.435471	0.314178	0.314135	0.411807	0.31977	0.464983	0.270824	4.77701	-6.18135	188
234	hupB	b0440	272	2.26118	6902.14	3052.45	0.193428	0.301029	690.656	0.38451	0.356684	0.390925	0.243868	0.266295	0.355354	0.265065	0.406149	282.597	0.496056	0.494472	0.455747	0.32547	0.400851	0.480354	0.407108	0.510272	261.461	0.415114	0.392796	0.400451	0.308726	0.274086	0.335789	0.353029	0.450284	0.254229	4.59458	-6.78135	209
235	ppiD	b0441	1871	0.625811	206.344	329.723	0.253781	0.354874	76.3654	0.407164	0.401953	0.412051	0.361889	0.336351	0.412701	0.335672	0.408914	36.3534	0.509466	0.50144	0.516694	0.428097	0.43131	0.467835	0.408448	0.511425	17.8035	0.454396	0.447778	0.440124	0.348774	0.34816	0.41762	0.328324	0.454255	0.276033	4.90882	-7.38135	192
249	apt	b0469	551	1.91329	1150.43	601.284	0.200241	0.364682	130.348	0.397344	0.389213	0.402986	0.28077	0.26838	0.303577	0.284246	0.412374	66.2165	0.512703	0.525196	0.495933	0.34399	0.354568	0.434173	0.350917	0.526321	19.7222	0.417917	0.403177	0.427976	0.309644	0.317337	0.312978	0.301564	0.431928	0.269574	4.61197	-5.18135	153
251	ybaB	b0471	329	2.18389	1685.64	771.852	0.206122	0.307903	161.133	0.369659	0.345351	0.392623	0.359421	0.343896	0.319079	0.344891	0.37302	82.0233	0.510286	0.464401	0.550409	0.39933	0.467653	0.468422	0.449292	0.515758	25	0.411441	0.357957	0.410924	0.33167	0.367354	0.344231	0.362243	0.411947	0.352591	5.0796	-6.28135	53
252	recR	b0472	605	0.12716	85.5375	672.677	0.220322	0.434017	90.632	0.538939	0.568439	0.506665	0.402302	0.486154	0.581951	0.472343	0.541244	48.8941	0.583332	0.608833	0.554313	0.482395	0.530586	0.606924	0.539374	0.586505	16.408	0.486529	0.47382	0.498333	0.332715	0.420258	0.491792	0.39759	0.492048	0.229069	4.0084	-3.18135	0
254	adk	b0474	644	2.7325	2098.77	768.077	0.218391	0.334224	190.696	0.377749	0.365167	0.383542	0.359541	0.329311	0.308532	0.338409	0.380427	79.974	0.508857	0.496569	0.51543	0.43486	0.52057	0.486307	0.476079	0.505527	25.3691	0.439087	0.435706	0.41582	0.323464	0.414897	0.381889	0.389279	0.439811	0.287208	5.30602	-9.08135	181
285	cysS	b0526	1385	1.14279	337.229	295.092	0.258478	0.368989	54.9444	0.404054	0.391515	0.415098	0.292289	0.324417	0.329906	0.347125	0.408441	29.0147	0.532388	0.516107	0.545718	0.442076	0.470369	0.45514	0.47451	0.535703	18.0568	0.473232	0.441191	0.471338	0.284826	0.366131	0.348032	0.372363	0.47293	0.261962	4.81702	-3.58135	3279
337	ahpC	b0605	563	2.59211	8331.34	3214.11	0.20589	0.315062	643.55	0.358499	0.345284	0.36959	0.281376	0.216542	0.302762	0.267324	0.365782	341.74	0.493855	0.48381	0.499763	0.35541	0.330619	0.457115	0.35191	0.494892	1086.37	0.377957	0.371263	0.380291	0.294692	0.244349	0.367058	0.306372	0.383434	0.289927	4.58156	-9.48135	4199
338	ahpF	b0606	1565	1.32676	590.966	445.422	0.234941	0.363565	56.3844	0.402029	0.394332	0.407285	0.351539	0.307796	0.326368	0.347385	0.405347	36.3451	0.51939	0.510669	0.525366	0.488662	0.432407	0.442498	0.476038	0.522441	151.211	0.406898	0.397688	0.41412	0.323533	0.279723	0.288403	0.319867	0.411512	0.269907	4.64765	-7.78135	245
343	cspE	b0623	209	3.13934	23170.8	7380.79	0.176917	0.277751	2119.24	0.376551	0.390123	0.362241	0.289463	0.354219	0.389528	0.338697	0.382063	893.256	0.494598	0.466873	0.514598	0.367125	0.452001	0.464454	0.432082	0.508589	649.033	0.427273	0.400349	0.445248	0.301843	0.389248	0.393224	0.37082	0.438975	0.24536	3.38359	-4.98135	175
346	tatE	b0627	203	1.93948	360.234	185.737	0.33878	0.316404	35.6029	0.436904	0.422236	0.441122	0.303416	0.380392	0.422236	0.338899	0.448471	17.6667	0.530374	0.530383	0.527694	0.369681	0.51206	0.530383	0.432036	0.534541	21.046	0.426476	0.383367	0.455813	0.2912	0.372246	0.383367	0.323351	0.439345	0.223871	5.7453	-6.88135	126
354	glnS	b0680	1664	1.20691	676.058	560.155	0.21439	0.369309	86.8511	0.430453	0.421773	0.432027	0.425212	0.389439	0.369818	0.420955	0.431067	47.5235	0.524648	0.50903	0.537277	0.526277	0.474178	0.413764	0.527691	0.525209	17.0141	0.477828	0.455599	0.459428	0.366894	0.364485	0.322198	0.36991	0.481037	0.264757	4.42934	-7.48135	203
357	seqA	b0687	545	1.097	473.948	432.041	0.248452	0.322624	70.5916	0.404799	0.434139	0.373379	0.289177	0.345604	0.411321	0.312929	0.410918	32.9554	0.47616	0.509226	0.440975	0.398447	0.441411	0.518163	0.428167	0.475891	17.0891	0.404499	0.40226	0.396485	0.240065	0.281254	0.352116	0.266349	0.418526	0.224231	3.59468	-1.68135	2871
390	ybgC	b0736	404	0.405843	103.921	256.063	0.277637	0.343243	38.9185	0.479628	0.481947	0.47046	0.432159	0.461852	0.496159	0.434589	0.471753	21.928	0.524125	0.503768	0.541867	0.437642	0.445882	0.481059	0.44671	0.535153	17.8907	0.451683	0.4279	0.436625	0.37478	0.413501	0.42929	0.390706	0.446076	0.209052	3.25646	-3.78135	150
394	tolB	b0740	1292	1.02653	642.108	625.516	0.409265	0.380108	134.261	0.504326	0.397198	0.556345	0.355052	0.330268	0.361682	0.364133	0.510838	69.7292	0.589269	0.531283	0.614282	0.417731	0.4004	0.436132	0.429705	0.595362	55.0966	0.530995	0.388706	0.601811	0.298632	0.274744	0.314739	0.324972	0.539565	0.231757	3.43969	-6.98135	133
395	pal	b0741	521	1.88253	4191.3	2226.42	0.175147	0.327313	542.496	0.401454	0.413174	0.38592	0.288774	0.364827	0.38561	0.333325	0.388728	209.085	0.520393	0.539817	0.495038	0.438778	0.482735	0.531738	0.470773	0.513581	141.116	0.394286	0.389524	0.39572	0.361026	0.323848	0.381136	0.377793	0.397027	0.306422	3.78203	-6.08135	35
396	ybgF	b0742	791	0.511068	350.487	685.794	0.313146	0.368015	152.967	0.477575	0.501577	0.451577	0.381247	0.568294	0.623826	0.503476	0.447474	66.2244	0.534619	0.552105	0.515282	0.50664	0.623989	0.652707	0.587155	0.512241	38.6745	0.486093	0.520644	0.447253	0.376728	0.550572	0.617645	0.481141	0.445179	0.228995	3.61168	-2.88135	10
426	ompX	b0814	515	2.30214	11141.4	4839.58	0.185121	0.350563	1202.18	0.331042	0.316845	0.343336	0.30977	0.323195	0.31473	0.330412	0.331717	483.459	0.451417	0.430386	0.471645	0.454472	0.446352	0.429156	0.476996	0.450921	253.202	0.326119	0.329849	0.320918	0.286114	0.290154	0.30692	0.310097	0.325443	0.269303	3.49449	-10.8814	7192
462	lrp	b0889	494	1.39729	651.219	466.06	0.238056	0.334251	92.9657	0.393991	0.405851	0.379242	0.267055	0.344086	0.355129	0.292738	0.402027	32.7978	0.514925	0.514702	0.514187	0.354745	0.464558	0.461151	0.408011	0.519805	35.4323	0.428808	0.4499	0.406448	0.316698	0.353615	0.360217	0.331203	0.437247	0.232697	3.94667	-3.98135	7055
478	rpsA	b0911	1673	0.620512	6418.06	10343.2	0.187188	0.357292	2061.8	0.428382	0.431309	0.425004	0.263431	0.407587	0.455923	0.347468	0.42914	1032.76	0.504175	0.50877	0.499261	0.299122	0.464756	0.507531	0.394554	0.50451	547.628	0.448954	0.45692	0.440507	0.275076	0.52034	0.532258	0.43402	0.444377	0.298419	5.23664	-0.281351	111
479	ihfB	b0912	284	1.95303	1667.3	853.697	0.183509	0.28338	200.933	0.378044	0.343945	0.389541	0.306189	0.319346	0.319337	0.326585	0.394836	100.651	0.461264	0.462761	0.410437	0.420377	0.467547	0.450194	0.436632	0.45278	117.239	0.354786	0.37206	0.302493	0.326448	0.348198	0.369794	0.343061	0.353236	0.24437	4.22637	-9.48135	160
529	gnsA	b4517	173	3.91546	626.242	159.941	0.291981	0.189711	51.7816	0.311581	0.323955	0.295133	0.263064	0.321252	0.319817	0.308451	0.302178	20.5625	0.488732	0.496029	0.463689	0.420035	0.47952	0.49341	0.444331	0.469555	24.2292	0.342195	0.325754	0.328624	0.289631	0.306359	0.36117	0.305793	0.339708	0.251275	4.51894	-7.88135	-10
578	yceD	b1088	521	0.095481	532.897	5581.19	0.262306	0.361823	1128.16	0.58789	0.535998	0.542504	0.411382	0.421363	0.44897	0.451232	0.592523	544.313	0.578803	0.532555	0.561078	0.456627	0.483717	0.504922	0.517567	0.576334	733.028	0.51985	0.460793	0.492341	0.407753	0.367731	0.380554	0.42499	0.522538	0.223248	5.3032	0.418649	895
579	rpmF	b1089	173	2.77045	19807.8	7149.66	0.144803	0.315491	2083.4	0.404017	0.414266	0.38625	0.287365	0.347638	0.402283	0.334557	0.423539	764.597	0.501842	0.5243	0.468013	0.411685	0.449305	0.519743	0.432025	0.520397	804.174	0.382913	0.362266	0.400703	0.226399	0.271732	0.361626	0.267153	0.436364	0.295772	3.00892	-10.0814	52
581	fabH	b1091	953	0.816368	842.585	1032.11	0.234468	0.394071	129.265	0.465689	0.467039	0.461919	0.40019	0.422279	0.450986	0.392637	0.464777	93.039	0.528773	0.524493	0.530381	0.46487	0.453985	0.474822	0.44305	0.533392	43.0065	0.465176	0.472475	0.449869	0.365435	0.363133	0.412271	0.360475	0.47143	0.230007	4.40099	-2.88135	68
582	fabD	b1092	929	1.10294	1360.46	1233.49	0.221739	0.413692	179.041	0.453484	0.46125	0.445607	0.325517	0.449957	0.456222	0.398098	0.453441	124.809	0.531505	0.57191	0.493058	0.341148	0.490603	0.546932	0.424036	0.532914	41.2922	0.475375	0.513091	0.437149	0.256448	0.434955	0.468372	0.371666	0.476636	0.241763	4.46962	-7.38135	16
583	fabG	b1093	734	0.574222	1547.05	2694.17	0.305704	0.383937	498.137	0.544257	0.436015	0.536408	0.308242	0.431368	0.427495	0.380709	0.547563	252.488	0.556689	0.52857	0.534875	0.431365	0.519297	0.510753	0.49003	0.555116	166.128	0.583764	0.417702	0.510771	0.345816	0.390998	0.39034	0.388289	0.579664	0.254565	4.29024	-6.18135	13
584	acpP	b1094	236	3.23596	38379.7	11860.4	0.211797	0.290381	2913.91	0.358915	0.311922	0.399975	0.285314	0.287719	0.309161	0.269918	0.3764	1329.45	0.454797	0.414183	0.492671	0.358794	0.362884	0.409609	0.343811	0.484049	957.473	0.379191	0.354537	0.399652	0.296713	0.282244	0.357368	0.286353	0.408986	0.25575	6.89593	-5.18135	211
585	fabF	b1095	1241	0.529772	1238.24	2337.3	0.217365	0.399041	380.714	0.49552	0.489237	0.501175	0.436534	0.473063	0.516161	0.468372	0.496118	202.447	0.569092	0.563458	0.571942	0.475458	0.538282	0.583643	0.513658	0.569271	170.311	0.476239	0.458608	0.479994	0.611908	0.502376	0.502297	0.581329	0.474964	0.245843	4.11775	-9.48135	88
591	ptsG	b1101	1433	0.436063	539.176	1236.46	0.203895	0.381724	276.218	0.449728	0.445663	0.44895	0.318751	0.38144	0.454579	0.348783	0.452021	139.865	0.523691	0.548239	0.498472	0.431045	0.459773	0.539122	0.444517	0.526091	17.8476	0.463658	0.447116	0.476958	0.482662	0.450537	0.520258	0.475113	0.458175	0.256768	2.92453	-7.78135	295
592	hinT	b1103	359	1.16875	227.021	194.244	0.281792	0.332061	39.3306	0.378487	0.382702	0.364637	0.270671	0.336256	0.375396	0.310909	0.38632	15.4121	0.494417	0.481222	0.502558	0.285183	0.384571	0.449632	0.354201	0.515256	17.1455	0.40681	0.344612	0.466288	0.287585	0.289311	0.291651	0.307551	0.429398	0.241221	4.40283	-6.08135	2583
598	ndh	b1109	1304	1.58064	1074.83	679.998	0.228513	0.351956	118.924	0.389424	0.377953	0.401084	0.388973	0.391148	0.355422	0.371327	0.388497	61.2659	0.481052	0.472805	0.489379	0.48015	0.467805	0.461986	0.462804	0.479908	33.6486	0.414904	0.385454	0.414348	0.406423	0.398367	0.385505	0.393521	0.414876	0.252759	3.9814	-14.0814	400
607	icd	b1136	1250	1.96183	2597.54	1324.04	0.214847	0.339056	280.788	0.368693	0.364584	0.372564	0.286223	0.288727	0.297322	0.298856	0.372941	145.029	0.49085	0.470055	0.510272	0.445842	0.401062	0.416473	0.420998	0.495553	30.2449	0.439367	0.401753	0.462653	0.356426	0.332099	0.317885	0.338393	0.443269	0.27624	4.44058	-8.68135	8053
664	galU	b1236	908	1.57059	845.631	538.417	0.226871	0.325264	127.022	0.369497	0.356379	0.378653	0.310028	0.31256	0.371366	0.319089	0.37258	54.6268	0.498656	0.500492	0.494081	0.446528	0.480652	0.520187	0.440927	0.498413	18.7668	0.443753	0.425413	0.453512	0.360535	0.317059	0.397406	0.340388	0.44958	0.23614	5.28813	-7.78135	202
667	oppA	b1243	1631	1.88079	1504.91	800.145	0.197499	0.311508	208.904	0.3544	0.344487	0.362317	0.317711	0.344101	0.365757	0.331394	0.352562	94.2097	0.449963	0.427518	0.470089	0.371215	0.424123	0.44865	0.402151	0.44902	169.223	0.398381	0.377017	0.370483	0.360368	0.376892	0.361324	0.3613	0.392164	0.234807	4.15432	-8.38135	738
668	oppB	b1244	920	0.471738	130.408	276.442	0.266029	0.324011	60.3268	0.401867	0.397669	0.402763	0.444141	0.421051	0.425029	0.420629	0.399426	37.376	0.489999	0.477713	0.502841	0.546748	0.454122	0.445243	0.503054	0.491266	15.055	0.460138	0.415814	0.478777	0.358826	0.327622	0.326375	0.338272	0.466798	0.216026	1.80907	-8.18135	86
669	oppC	b1245	908	0.41861	161.065	384.763	0.263318	0.383789	57.4323	0.423595	0.420349	0.424229	0.324441	0.338076	0.377413	0.345854	0.42831	37.9477	0.513186	0.52374	0.498447	0.378806	0.473352	0.448635	0.44809	0.516531	36.281	0.408895	0.406306	0.410678	0.299534	0.319955	0.332745	0.318188	0.415334	0.228623	2.88387	-6.18135	15
670	oppD	b1246	1013	0.545766	259.753	475.942	0.230838	0.357957	79.0404	0.428257	0.406723	0.44638	0.353191	0.331813	0.380221	0.348119	0.434546	45.8811	0.496936	0.473089	0.519243	0.405344	0.359773	0.404809	0.397545	0.505969	37.6829	0.405315	0.390292	0.419276	0.297858	0.272133	0.3302	0.304822	0.412448	0.228822	3.60346	-9.98135	12
671	oppF	b1247	1004	0.667283	276.724	414.703	0.258136	0.358436	74.7721	0.430548	0.441902	0.398085	0.324987	0.360006	0.380062	0.355377	0.434995	44.5374	0.503476	0.510157	0.481579	0.445872	0.502587	0.472928	0.488622	0.503261	42.3159	0.421096	0.414944	0.421235	0.311033	0.325723	0.357655	0.332642	0.426531	0.226159	3.45735	-9.48135	-3
672	yciY	b4595	173	1.62668	455.328	279.913	0.293251	0.347341	73.8621	0.477152	0.550669	0.373838	0.496095	0.578393	0.543674	0.571249	0.368807	26.3056	0.555037	0.618684	0.455375	0.600326	0.609845	0.61542	0.656457	0.489851	36.4722	0.442704	0.514264	0.365681	0.468122	0.554782	0.504512	0.543467	0.349663	0.179526	-0.348992	-2.88135	2020
678	rluB	b1269	875	1.53581	654.265	426.006	0.261895	0.389783	90.274	0.432718	0.438069	0.425877	0.442217	0.478672	0.442202	0.450966	0.427579	40.9563	0.535839	0.51345	0.556722	0.473196	0.488459	0.464472	0.488994	0.53894	19.1123	0.44192	0.411755	0.468313	0.432088	0.430712	0.40936	0.433181	0.442337	0.269221	4.0239	-6.08135	211
680	topA	b1274	2597	0.804737	300.578	373.51	0.259992	0.368263	63.8102	0.452936	0.443112	0.462124	0.363854	0.373162	0.433057	0.341215	0.454545	31.1324	0.527083	0.518334	0.535001	0.474645	0.453612	0.507189	0.425705	0.528337	16.8127	0.445842	0.428266	0.462478	0.322159	0.348159	0.398547	0.314521	0.446698	0.252813	4.37737	-7.08135	667
688	pyrF	b1281	737	1.08944	231.03	212.064	0.302092	0.380353	34.9797	0.415556	0.413274	0.415747	0.363316	0.333396	0.415823	0.395063	0.417969	20.2161	0.513353	0.476019	0.548402	0.408048	0.410893	0.473779	0.430999	0.519488	21.9929	0.434866	0.410992	0.457425	0.258794	0.308597	0.370056	0.307838	0.444619	0.221505	3.71631	-6.88135	194
689	yciH	b1282	326	1.06468	142.243	133.602	0.333966	0.308528	33.9694	0.446199	0.476689	0.411353	0.355152	0.39942	0.483365	0.377097	0.455736	20.8081	0.508005	0.538601	0.467741	0.458461	0.496799	0.564875	0.475135	0.506344	20.5522	0.420484	0.439352	0.392175	0.348099	0.395346	0.460499	0.375643	0.419783	0.252305	5.48368	-6.18135	0
719	ynaJ	b1332	257	2.41712	674.638	279.108	0.289816	0.332451	74.2791	0.388874	0.378623	0.366265	0.260606	0.292495	0.38557	0.289189	0.399418	26.6535	0.527946	0.502086	0.539354	0.485523	0.524058	0.51496	0.525208	0.508232	34.7763	0.428661	0.413504	0.43108	0.347302	0.378073	0.414609	0.371635	0.423147	0.21459	2.49141	-6.08135	273
793	ydcY	b1446	233	1.96582	593.655	301.989	0.24786	0.321803	59.3333	0.415555	0.446323	0.363897	0.418611	0.459444	0.475226	0.431797	0.383435	22.3676	0.544477	0.545053	0.529074	0.470926	0.521831	0.562901	0.48719	0.534915	33.9608	0.394533	0.395643	0.352066	0.375717	0.317007	0.418566	0.372632	0.403659	0.238718	6.13234	-9.98135	86
882	slyB	b1641	467	2.15392	1853.36	860.458	0.209429	0.348137	184.41	0.382624	0.351258	0.407734	0.266241	0.277708	0.361211	0.293515	0.39378	87.9429	0.509659	0.488666	0.524205	0.340868	0.411071	0.5058	0.393569	0.518234	28.7329	0.453571	0.428847	0.466828	0.308786	0.310322	0.397564	0.349056	0.464061	0.256602	4.23918	-7.78135	4894
892	sodB	b1656	581	3.91284	3601.93	920.541	0.201016	0.327246	206.034	0.358399	0.32341	0.393317	0.307581	0.314832	0.295969	0.339208	0.362597	112.611	0.487012	0.470459	0.502804	0.403189	0.457471	0.441395	0.442434	0.489726	71.4348	0.367636	0.350611	0.385059	0.220306	0.322921	0.318008	0.288482	0.372103	0.236118	3.86884	-9.88135	128
900	lpp	b1677	236	2.48685	106248	42723.8	0.183552	0.333559	10968.5	0.383498	0.354741	0.403067	0.301197	0.262833	0.342235	0.301882	0.407042	3947.42	0.573407	0.555902	0.584258	0.482218	0.490733	0.558917	0.485552	0.588971	3485.06	0.415417	0.377433	0.442788	0.325549	0.27899	0.367828	0.311802	0.437403	0.294775	3.2472	-6.58135	311
943	gapA	b1779	995	2.38568	10054.5	4214.52	0.170434	0.314372	880.518	0.373566	0.360942	0.384277	0.278174	0.325221	0.401367	0.30784	0.375469	378.035	0.509974	0.52163	0.496514	0.406884	0.500425	0.563884	0.45636	0.51008	31.3975	0.43773	0.436771	0.435476	0.334351	0.383637	0.461122	0.366312	0.437596	0.281784	4.10908	-5.28135	10243
958	yoaB	b1809	344	2.88735	547.29	189.548	0.256674	0.317122	45.9449	0.368839	0.346202	0.394402	0.369886	0.331521	0.32149	0.362346	0.375288	21.4254	0.517031	0.458641	0.576356	0.475272	0.428589	0.419928	0.459051	0.533084	19.8794	0.410741	0.403047	0.410581	0.429719	0.411116	0.39509	0.411823	0.399165	0.248354	4.80859	-7.48135	6557
995	ftnA	b1905	497	5.73392	323.761	56.4641	0.280006	0.251247	29.8032	0.338633	0.343416	0.328235	0.322727	0.247279	0.258499	0.31495	0.344483	29.4701	0.465756	0.452777	0.474855	0.464694	0.379533	0.40155	0.431393	0.473637	23.4573	0.358544	0.329536	0.375001	0.320108	0.292145	0.302595	0.317852	0.363587	0.254558	4.48496	-6.18135	171
997	yecF	b1915	224	7.10143	568.405	80.0409	0.258436	0.277634	54.2	0.376507	0.38397	0.363772	0.312035	0.31762	0.347206	0.314737	0.395787	20.9949	0.498099	0.543916	0.42987	0.376022	0.483706	0.520726	0.430314	0.494885	26.0872	0.423338	0.449405	0.397601	0.272715	0.377759	0.434046	0.332368	0.438884	0.281889	4.12049	-6.88135	4926
1105	yeiP	b2171	572	2.16685	550.511	254.06	0.255972	0.323776	73.082	0.354806	0.351358	0.357507	0.318756	0.305716	0.33787	0.336159	0.359071	29.3352	0.481357	0.463492	0.498463	0.45787	0.417926	0.45059	0.458466	0.491246	30.1639	0.402163	0.379758	0.405921	0.365324	0.333487	0.376186	0.373255	0.412022	0.285027	5.17936	-5.18135	406
1109	spr	b2175	566	0.887228	402.317	453.454	0.236228	0.357279	106.24	0.442568	0.449982	0.416114	0.339343	0.436534	0.41305	0.380719	0.442793	44.5289	0.511812	0.525374	0.488844	0.383446	0.462479	0.460199	0.422298	0.514918	40.2607	0.45248	0.459312	0.443691	0.337818	0.43561	0.404859	0.377907	0.453472	0.221816	3.18122	-5.78135	412
1116	rplY	b2185	284	1.89913	8169.55	4301.73	0.173182	0.270915	1192.78	0.391521	0.412753	0.369854	0.290089	0.424056	0.419449	0.371489	0.385566	470.761	0.448901	0.478885	0.419284	0.321793	0.437895	0.452187	0.398776	0.451665	568.357	0.370921	0.367818	0.350858	0.221297	0.320608	0.357156	0.296024	0.372997	0.293766	4.5391	-6.18135	125
1117	yejL	b2187	227	4.43719	691.778	155.905	0.263969	0.234581	72.0965	0.418291	0.393282	0.428897	0.399202	0.362602	0.395886	0.426438	0.420816	25.298	0.515602	0.528518	0.482538	0.555125	0.491335	0.530175	0.574897	0.507125	19.5	0.424173	0.405852	0.422303	0.422987	0.347653	0.403915	0.408145	0.445166	0.251243	3.55143	-0.281351	1328
1123	rcsB	b2217	650	1.42069	452.511	318.515	0.226361	0.308369	76.4055	0.367371	0.341267	0.391257	0.317184	0.368169	0.348356	0.340719	0.366389	31.8261	0.484774	0.433708	0.530328	0.460884	0.445452	0.426813	0.455716	0.486861	18.2802	0.389774	0.380541	0.397486	0.367654	0.379015	0.382179	0.360451	0.388777	0.245218	4.21076	-4.88135	17
1156	ackA	b2296	1202	1.9914	2610.36	1310.82	0.200807	0.3351	257.63	0.391907	0.366008	0.415675	0.341448	0.365423	0.361202	0.356331	0.391576	129.186	0.491449	0.459396	0.517375	0.4014	0.451234	0.443105	0.448167	0.492606	30.7127	0.435998	0.418611	0.450891	0.343576	0.371147	0.359906	0.376235	0.425922	0.276142	4.09159	-4.98135	4009
1165	fadL	b2344	1340	1.14989	401.463	349.131	0.248028	0.34103	84.6614	0.399308	0.420384	0.377775	0.388417	0.399501	0.416205	0.395073	0.398924	42.9794	0.496665	0.534527	0.456121	0.500459	0.506543	0.524062	0.50711	0.495491	16.6369	0.435089	0.464846	0.395764	0.35039	0.401088	0.415533	0.369924	0.432974	0.233728	3.34078	-7.28135	12149
1199	ptsH	b2415	257	2.93412	5146.55	1754.04	0.162368	0.279105	456.31	0.352478	0.327069	0.36386	0.24266	0.350318	0.326383	0.30932	0.349725	198.846	0.471639	0.462961	0.465557	0.358559	0.479964	0.443197	0.435357	0.469196	28.9912	0.397249	0.369246	0.411301	0.340746	0.388286	0.349957	0.372126	0.397289	0.253669	5.25478	-5.28135	384
1200	ptsI	b2416	1727	0.9437	1228.38	1301.66	0.243911	0.358014	237.824	0.483243	0.503784	0.454722	0.399246	0.466766	0.473368	0.435373	0.48296	125.79	0.52757	0.532239	0.520039	0.424848	0.496839	0.50251	0.447136	0.527915	26.5724	0.588132	0.513583	0.598471	0.304946	0.394041	0.432238	0.356164	0.593405	0.266867	4.60364	-9.48135	45
1201	crr	b2417	509	1.5387	2796.33	1817.33	0.210073	0.331395	404.51	0.395053	0.376707	0.411851	0.306665	0.306559	0.357711	0.310199	0.404002	181.812	0.469073	0.473178	0.464009	0.374596	0.390065	0.433171	0.381212	0.476365	93.6104	0.396829	0.374443	0.415208	0.280964	0.274436	0.329504	0.287374	0.408996	0.269896	5.57722	-7.78135	41
1250	suhB	b2533	803	1.39451	741.234	531.538	0.212557	0.36477	119.884	0.409251	0.403381	0.406149	0.468646	0.465965	0.431422	0.449585	0.403523	57.5672	0.512939	0.487614	0.537513	0.530524	0.546797	0.518894	0.545692	0.507888	27.6382	0.497301	0.461928	0.415846	0.473604	0.483703	0.401068	0.470745	0.495686	0.263894	4.40984	-6.28135	10103
1273	bamD	b2595	737	1.2995	536.432	412.799	0.239482	0.35133	97.1802	0.374357	0.365453	0.38202	0.302906	0.366173	0.390833	0.328286	0.374688	40.8065	0.481092	0.473621	0.483467	0.358507	0.456674	0.508851	0.397844	0.482465	15.7401	0.416388	0.386172	0.437315	0.290751	0.357168	0.417123	0.310632	0.41772	0.250183	3.97764	-7.48135	11695
1328	mprA	b2684	530	2.3568	1012.48	429.598	0.216565	0.315547	116.347	0.375705	0.36525	0.383962	0.285025	0.381636	0.41906	0.354982	0.374015	43.1617	0.499892	0.481139	0.516372	0.398194	0.520586	0.553728	0.467767	0.496406	16.1058	0.44591	0.386551	0.44311	0.352674	0.357282	0.400807	0.359152	0.453427	0.228639	4.37012	-8.48135	91
1366	sdaC	b2796	1289	0.696801	657.702	943.888	0.194767	0.355229	147.878	0.383808	0.389313	0.376033	0.384608	0.348058	0.347263	0.377531	0.37882	97.7349	0.473085	0.501774	0.443928	0.509547	0.462267	0.506564	0.508258	0.466382	37.5262	0.40709	0.416808	0.379727	0.383076	0.349253	0.410893	0.379624	0.394233	0.288775	2.1899	-7.78135	557
1415	zapA	b2910	329	0.723261	300.004	414.793	0.332147	0.269878	92.0273	0.428699	0.384018	0.430443	0.346391	0.441576	0.452026	0.42563	0.403972	40.9933	0.525801	0.456462	0.559268	0.412284	0.517426	0.525526	0.476293	0.518906	85.4267	0.405455	0.365716	0.416891	0.29943	0.411263	0.394211	0.374355	0.395121	0.248867	4.05847	-8.98135	10511
1438	yggX	b2962	275	1.63646	500.748	305.995	0.297065	0.294036	74.3986	0.352305	0.330182	0.36889	0.295872	0.296842	0.334277	0.300789	0.36168	31.626	0.477971	0.42829	0.513942	0.413787	0.43867	0.42623	0.433585	0.48346	15.439	0.428379	0.371284	0.469251	0.333333	0.316545	0.358765	0.328425	0.446372	0.273328	4.64121	-6.78135	28
1457	ygiN	b3029	314	1.53996	465.574	302.33	0.234685	0.323121	65.5746	0.389013	0.392105	0.382683	0.384448	0.34989	0.350598	0.37898	0.398372	25.3614	0.54571	0.564299	0.518484	0.555981	0.528723	0.555178	0.562481	0.54739	17.0386	0.420638	0.399304	0.434171	0.362965	0.338987	0.373412	0.373077	0.44104	0.24045	4.22457	-8.68135	31
1478	rpsU	b3065	215	1.8794	18413.5	9797.53	0.207956	0.310791	1752.36	0.442736	0.438177	0.431677	0.359633	0.42292	0.435157	0.374832	0.443824	738.468	0.606589	0.595383	0.60851	0.479586	0.589174	0.593419	0.52051	0.615458	464.93	0.480954	0.509581	0.452798	0.431542	0.480822	0.512843	0.469512	0.475818	0.306842	4.24927	-5.48135	1294
1479	dnaG	b3066	1745	0.131628	47.2748	359.155	0.335488	0.364997	44.0808	0.577177	0.567505	0.498649	0.533767	0.671865	0.619869	0.596273	0.559246	29.5915	0.591868	0.582044	0.535579	0.580025	0.67655	0.622103	0.633711	0.573682	35.0618	0.535116	0.527002	0.473149	0.460316	0.587123	0.563536	0.544642	0.512605	0.216609	3.36917	-2.28135	111
1480	rpoD	b3067	1841	1.15621	1045.33	904.097	0.198212	0.35226	131.647	0.435829	0.421248	0.447463	0.382321	0.426598	0.412751	0.406709	0.435818	78.7047	0.511932	0.499297	0.521849	0.482357	0.521906	0.480449	0.495911	0.511088	38.0822	0.459043	0.436551	0.475164	0.375104	0.46087	0.437874	0.419266	0.455474	0.291601	5.68978	-3.58135	195
1539	yhbY	b3180	293	2.80692	1632.17	581.479	0.194324	0.329078	173.895	0.363486	0.319185	0.400116	0.331885	0.263124	0.292854	0.324022	0.392304	80.2045	0.526586	0.512259	0.538559	0.525002	0.44348	0.481315	0.502183	0.550315	88.0455	0.424375	0.404348	0.440987	0.436405	0.342098	0.368235	0.416762	0.44774	0.249184	4.06661	-2.18135	7810
1541	ispB	b3187	971	0.744703	193.086	259.28	0.26368	0.357673	54.466	0.453353	0.46502	0.440305	0.494732	0.506179	0.469865	0.521504	0.450212	24.7654	0.541706	0.53461	0.546877	0.60815	0.602308	0.565747	0.611568	0.536964	21.2728	0.431245	0.434739	0.426295	0.33491	0.380162	0.398465	0.379516	0.435526	0.239272	4.46716	-1.68135	3314
1547	lptA	b3200	557	0.924425	214.193	231.704	0.26967	0.306068	41.328	0.372727	0.379479	0.364558	0.316739	0.327074	0.329027	0.344397	0.376984	21.1061	0.49141	0.489321	0.489231	0.470002	0.50682	0.508968	0.48639	0.488636	17.5076	0.413727	0.404926	0.421129	0.31708	0.304555	0.310014	0.331509	0.425229	0.269738	4.31916	-4.18135	-31
1565	yhcB	b3233	398	1.06777	269.411	252.311	0.255249	0.368643	69.9749	0.397832	0.362022	0.406292	0.2818	0.307561	0.364873	0.302089	0.407751	24.5556	0.515959	0.508467	0.505215	0.413778	0.524899	0.556546	0.463991	0.501643	27.4851	0.413211	0.403837	0.398972	0.30034	0.411972	0.422149	0.357344	0.406053	0.267456	4.29984	-6.18135	3955
1568	argR	b3237	470	1.42379	315.928	221.892	0.25696	0.305872	54.4501	0.398405	0.387919	0.401141	0.365776	0.275531	0.343303	0.316622	0.415789	22.8934	0.482758	0.461224	0.502133	0.453173	0.37307	0.416529	0.417642	0.499193	20.1814	0.431999	0.426859	0.433161	0.262172	0.263112	0.369339	0.266608	0.443218	0.236146	3.87884	-3.38135	1436
1574	accB	b3255	470	1.78141	2847.81	1598.62	0.193318	0.329021	273.193	0.405988	0.425187	0.382126	0.265885	0.264084	0.323861	0.275191	0.422057	148.349	0.501717	0.544286	0.455375	0.377828	0.363764	0.41626	0.39268	0.518242	40.3673	0.494595	0.492279	0.395645	0.28042	0.30943	0.38706	0.312575	0.500394	0.270853	4.53918	-3.58135	402
1575	accC	b3256	1349	0.591595	953.042	1610.97	0.209603	0.383069	248.77	0.48433	0.513387	0.455212	0.521152	0.584429	0.551569	0.57319	0.47863	129.443	0.539362	0.573415	0.501624	0.56396	0.627521	0.59472	0.612624	0.532167	24.6856	0.496154	0.498072	0.492456	0.456596	0.508723	0.509706	0.499943	0.49396	0.280182	4.04698	-6.78135	11
1579	dusB	b3260	965	0.0241591	35.794	1481.59	0.284341	0.374497	291.696	0.596043	0.541159	0.606123	0.489134	0.51234	0.495416	0.524469	0.598724	157.456	0.577922	0.575647	0.564258	0.559437	0.552747	0.546886	0.569752	0.577486	178.737	0.514484	0.501551	0.524662	0.473977	0.49098	0.476794	0.501728	0.51624	0.216069	3.48749	-1.68135	329
1580	fis	b3261	296	2.05662	4515.79	2195.73	0.205485	0.269122	542.185	0.357219	0.334308	0.378943	0.322178	0.386555	0.368032	0.360094	0.344553	254.955	0.456523	0.43907	0.472399	0.383015	0.489851	0.474427	0.432439	0.444092	185.019	0.406223	0.391928	0.417691	0.309334	0.412511	0.397725	0.366366	0.40141	0.324091	4.36175	-3.48135	26
1592	def	b3287	509	1.08048	326.626	302.296	0.242207	0.31666	82.7059	0.408645	0.40068	0.414043	0.378876	0.422404	0.382239	0.4073	0.406088	38.4396	0.493471	0.467215	0.51627	0.418269	0.471175	0.43056	0.441637	0.495642	42.9688	0.425506	0.424092	0.424031	0.320106	0.370773	0.36766	0.346054	0.418672	0.259289	4.72334	-6.18135	3900
1593	fmt	b3288	947	0.691372	214.445	310.173	0.24125	0.372418	52.6392	0.436038	0.474123	0.398197	0.350919	0.506905	0.545197	0.439614	0.428991	28.1329	0.510149	0.539724	0.481545	0.353702	0.49991	0.516937	0.440111	0.510413	34.4259	0.414749	0.439511	0.390958	0.310848	0.452036	0.481761	0.394803	0.410445	0.228546	3.91445	-7.38135	15
1596	mscL	b3291	410	1.3595	192.504	141.599	0.329317	0.310146	34.5401	0.385245	0.409017	0.359506	0.419031	0.38029	0.386182	0.433251	0.381876	17.1654	0.507777	0.500379	0.506885	0.538422	0.467029	0.468824	0.545504	0.505271	16.4593	0.387336	0.397528	0.366735	0.404307	0.281202	0.327977	0.384817	0.400353	0.237516	3.3883	-9.68135	130
1609	slyX	b3348	218	1.24594	198.813	159.568	0.344743	0.29289	38.6712	0.433671	0.394879	0.452663	0.41328	0.45523	0.403607	0.475869	0.415376	15.9048	0.535819	0.502245	0.562064	0.522044	0.48929	0.502314	0.554601	0.54592	33.4444	0.410625	0.329253	0.432344	0.397629	0.351929	0.338429	0.419533	0.41881	0.227627	5.27833	-7.88135	11420
1614	crp	b3357	632	1.13091	722.475	638.842	0.215426	0.34663	151.524	0.373142	0.377548	0.367577	0.328746	0.340904	0.337351	0.352422	0.375361	57.1277	0.49427	0.491642	0.494167	0.422082	0.494777	0.483511	0.488784	0.492877	33.2687	0.403605	0.405236	0.393131	0.301723	0.402327	0.413028	0.37146	0.396956	0.276003	3.67894	-5.18135	761
1632	pck	b3403	1622	1.62012	466.87	288.171	0.260748	0.358039	52.4763	0.417173	0.403753	0.41115	0.26325	0.274275	0.343544	0.268197	0.418727	28.4972	0.520568	0.521746	0.51229	0.406262	0.43303	0.471304	0.409386	0.521939	24.3063	0.448479	0.433781	0.409324	0.366196	0.337361	0.411091	0.342752	0.446651	0.260675	4.25549	-9.98135	2166
1661	dcrB	b3472	557	1.57653	548.61	347.985	0.235501	0.353124	87.9642	0.386737	0.392424	0.377076	0.283002	0.392384	0.363575	0.347399	0.384384	36.4773	0.502016	0.514834	0.482593	0.474421	0.566775	0.530871	0.524729	0.490238	15.161	0.420717	0.436031	0.400686	0.351098	0.437073	0.403203	0.393291	0.414231	0.259874	4.56467	-6.08135	73
1675	pitA	b3493	1499	0.318415	157.845	495.72	0.252851	0.409186	69.8327	0.506092	0.527609	0.484327	0.426813	0.448737	0.457447	0.412789	0.5073	42.0585	0.577547	0.593831	0.562474	0.549296	0.544647	0.570001	0.541172	0.577535	28.1034	0.503884	0.541707	0.466723	0.397489	0.44589	0.458265	0.392739	0.504268	0.240065	2.77752	-1.68135	1749
1676	uspA	b3495	434	4.51223	1089.87	241.537	0.212228	0.287811	81.0299	0.331849	0.333316	0.329609	0.286024	0.307155	0.3257	0.297449	0.335197	31.0963	0.500482	0.513363	0.483921	0.386989	0.441241	0.439138	0.42317	0.509305	66.9012	0.345037	0.348918	0.338383	0.263921	0.264884	0.313131	0.289789	0.351264	0.256738	4.2225	-8.68135	970
1705	cspA	b3556	212	2.24015	7347.97	3280.12	0.219443	0.301132	574.005	0.348961	0.347903	0.337116	0.323411	0.338721	0.336797	0.330314	0.340771	144.552	0.512011	0.460166	0.545793	0.430508	0.40753	0.442776	0.443546	0.541001	227.311	0.423446	0.342531	0.456371	0.355231	0.336845	0.327489	0.364515	0.438732	0.290312	4.08008	-4.18135	281
1754	dut	b3640	455	1.19042	415.777	349.271	0.242818	0.380637	73.6469	0.414934	0.439935	0.380523	0.348513	0.393541	0.414283	0.399314	0.415389	32.561	0.524092	0.498449	0.549575	0.383541	0.381943	0.445292	0.419077	0.544301	24.5704	0.462282	0.438571	0.480773	0.334132	0.362229	0.374744	0.388173	0.477533	0.241892	4.62726	-2.88135	-19
1756	yicC	b3644	863	1.06934	252.71	236.322	0.280467	0.360452	51.6354	0.427067	0.420303	0.430266	0.442968	0.446849	0.445465	0.441493	0.422196	21.7974	0.546292	0.558847	0.531872	0.57277	0.500758	0.525163	0.539421	0.547364	15.2722	0.422587	0.444065	0.398618	0.483844	0.497522	0.483312	0.46484	0.416253	0.269737	4.70848	-5.18135	1586
1759	gmk	b3648	623	0.713979	391.423	548.228	0.255952	0.338507	105.849	0.457208	0.438069	0.473687	0.298552	0.394773	0.406829	0.353785	0.459079	49.8148	0.523151	0.52626	0.519134	0.442343	0.477572	0.489681	0.475199	0.523125	71.0673	0.455546	0.465887	0.434184	0.364981	0.403357	0.414445	0.376584	0.457089	0.223184	5.02899	-0.281351	1937
1760	rpoZ	b3649	275	2.16505	2722.07	1257.28	0.186606	0.329455	354.152	0.373386	0.338985	0.401794	0.336572	0.296976	0.343769	0.349276	0.387948	136.992	0.486084	0.457812	0.507208	0.365946	0.406353	0.435913	0.409849	0.502967	255.045	0.4125	0.376794	0.435424	0.345318	0.341249	0.377541	0.373495	0.426057	0.303241	6.34363	-6.18135	55
1761	spoT	b3650	2108	0.144883	54.4233	375.637	0.416401	0.382443	59.8568	0.616087	0.627742	0.484697	0.45292	0.51612	0.547941	0.505943	0.600847	31.5204	0.622593	0.621067	0.548648	0.436846	0.480724	0.528295	0.484863	0.617335	25.8124	0.765124	0.711504	0.472595	0.383822	0.486374	0.499482	0.470877	0.753472	0.243078	4.0202	-6.88135	19
1781	rnpA	b3704	359	0.162053	183.096	1129.85	0.400123	0.327103	232.933	0.586644	0.603986	0.551985	0.581516	0.634151	0.614885	0.645136	0.52734	98.2424	0.562368	0.576832	0.539129	0.556604	0.600706	0.589098	0.637263	0.52338	57.3576	0.564524	0.59316	0.510164	0.514491	0.644627	0.627792	0.615883	0.477006	0.208477	3.17714	-0.881351	17
1782	yidD	b4557	257	0.0851038	67.8642	797.428	0.275735	0.387237	145.279	0.493833	0.501466	0.478903	0.511335	0.42262	0.439459	0.500983	0.500298	80.4474	0.505079	0.520731	0.487197	0.492358	0.422253	0.466136	0.46765	0.519899	48.0877	0.459753	0.438929	0.477073	0.429555	0.350116	0.407491	0.40272	0.480839	0.179317	1.71608	-3.58135	-36
1783	yidC	b3705	1646	0.399178	430.712	1079	0.211371	0.375571	199.132	0.423852	0.415302	0.432378	0.280932	0.382183	0.461785	0.329257	0.424723	101.75	0.505019	0.49373	0.516968	0.385145	0.513681	0.562913	0.434824	0.504042	47.5294	0.4619	0.448216	0.424056	0.279942	0.407606	0.484248	0.340308	0.457034	0.275744	3.21282	-2.88135	3
1803	yifE	b3764	338	1.5303	3670.73	2398.7	0.246405	0.319112	485.277	0.434995	0.407862	0.457749	0.310496	0.328198	0.354261	0.323101	0.456917	211.129	0.554849	0.497541	0.600054	0.406459	0.390936	0.412961	0.380697	0.585694	369.88	0.472194	0.431011	0.508588	0.260211	0.287195	0.373556	0.274039	0.51003	0.221559	4.98762	-8.98135	8867
1813	trxA	b3781	329	1.9511	2753.05	1411.03	0.206337	0.345289	339.809	0.355079	0.350522	0.354897	0.24492	0.263782	0.322945	0.278667	0.374538	126.853	0.498911	0.513722	0.481476	0.417135	0.458302	0.489093	0.445638	0.507055	71.69	0.400224	0.382312	0.411087	0.271473	0.2959	0.357853	0.298276	0.41944	0.267738	4.73063	-6.18135	3063
1814	rho	b3783	1259	2.05497	1427.64	694.728	0.206623	0.333312	177.375	0.400687	0.390208	0.409925	0.347472	0.371031	0.382463	0.362784	0.401361	76.0382	0.500388	0.505974	0.49459	0.420698	0.434002	0.445583	0.421759	0.502798	37.9675	0.504927	0.495729	0.430502	0.329588	0.353487	0.334033	0.333758	0.500117	0.273281	4.45258	-2.18135	327
1815	rfe	b3784	1103	0.386694	95.6236	247.285	0.292359	0.363463	43.4728	0.431736	0.427807	0.428856	0.335736	0.411379	0.444878	0.373311	0.432502	21.5242	0.519635	0.535076	0.502461	0.375639	0.458435	0.549567	0.444197	0.522582	17.2216	0.513594	0.494153	0.466193	0.293751	0.368415	0.467475	0.348305	0.517925	0.225592	1.7584	-2.98135	240
1827	yifK	b3795	1385	0.481543	102.175	212.183	0.285511	0.398007	37.0988	0.43472	0.443455	0.425659	0.380361	0.383225	0.448231	0.374253	0.434675	18.8282	0.536788	0.547112	0.524028	0.363164	0.37575	0.464202	0.357653	0.545686	16.5361	0.46029	0.466374	0.428533	0.344849	0.341682	0.407937	0.347267	0.45057	0.237707	1.86161	-6.18135	191
1836	corA	b3816	950	0.652708	114.756	175.815	0.310792	0.366316	37.6982	0.454886	0.444183	0.452764	0.40856	0.367155	0.338104	0.39379	0.460541	20.823	0.5255	0.505797	0.540696	0.519434	0.414739	0.451843	0.481362	0.532959	57.9229	0.412084	0.426634	0.392842	0.351268	0.272396	0.282779	0.325998	0.419758	0.253991	4.32433	-6.18135	1281
1843	metE	b3829	2261	1.80016	23032.5	12794.7	0.1807	0.385935	1286.14	0.373642	0.365377	0.381297	0.249699	0.306196	0.326202	0.289949	0.374834	725.172	0.494269	0.491939	0.495067	0.415091	0.463058	0.458901	0.450006	0.494722	192.717	0.412439	0.405025	0.412534	0.267764	0.314823	0.329706	0.31741	0.413247	0.255439	4.41848	-6.18135	1078
1846	ubiE	b3833	755	1.2985	421.291	324.444	0.230391	0.346106	57.4087	0.409702	0.408231	0.392678	0.330302	0.357782	0.424681	0.366187	0.406526	27.1446	0.515303	0.508394	0.514396	0.524172	0.4543	0.518197	0.507587	0.51726	33.5344	0.43722	0.415628	0.430985	0.361812	0.330137	0.386897	0.353532	0.442575	0.249797	4.43384	-6.58135	95
1847	yigP	b3834	605	0.468512	117.799	251.433	0.282685	0.399702	34.6881	0.472215	0.476725	0.463485	0.397643	0.407382	0.490074	0.390167	0.477558	19.9844	0.56328	0.565915	0.553345	0.487597	0.495382	0.571352	0.479782	0.56715	17.1493	0.479443	0.476901	0.464471	0.356196	0.368553	0.470103	0.368733	0.477574	0.247419	4.61741	-7.78135	14
1849	tatA	b3836	269	1.78268	715.013	401.09	0.257493	0.290595	105.611	0.359169	0.371199	0.345396	0.34619	0.348835	0.376214	0.385201	0.359472	44.6375	0.431864	0.446753	0.419991	0.449024	0.429985	0.461667	0.464459	0.430618	72.5542	0.38794	0.396251	0.379644	0.294315	0.222628	0.390559	0.313237	0.408844	0.23306	5.38725	-6.18135	79
1850	tatB	b3838	515	0.241329	98.5426	408.332	0.269262	0.353223	69.0465	0.487257	0.488471	0.467129	0.392717	0.534965	0.514764	0.470938	0.481145	32.4403	0.49256	0.506946	0.470419	0.433638	0.545981	0.524219	0.49538	0.486065	27.4733	0.482761	0.477953	0.432263	0.403683	0.569424	0.509533	0.485301	0.453658	0.217249	4.91717	-5.98135	4
1861	dsbA	b3860	626	2.09037	835.477	399.679	0.242139	0.337061	116.807	0.387057	0.370208	0.399982	0.381974	0.477376	0.367573	0.432095	0.377194	49.5511	0.515902	0.490318	0.537675	0.495819	0.586391	0.50482	0.560531	0.503786	18.7638	0.43677	0.431777	0.440409	0.407135	0.492113	0.394017	0.460496	0.432554	0.254457	4.68251	-6.18135	17
1866	typA	b3871	1823	0.878523	1595.07	1815.63	0.19113	0.361744	280.026	0.439988	0.426728	0.452759	0.470475	0.501024	0.466106	0.493159	0.436562	140.617	0.506393	0.484786	0.527526	0.555581	0.544374	0.506751	0.552292	0.503669	55.3161	0.425273	0.406124	0.437765	0.453666	0.455075	0.411948	0.461685	0.42091	0.281261	5.00614	-6.18135	4989
1882	sodA	b3908	620	2.36725	4119.84	1740.35	0.205843	0.35	462.671	0.372829	0.344638	0.401558	0.346518	0.308963	0.292784	0.333123	0.375145	123.43	0.49402	0.471972	0.515675	0.486945	0.498183	0.478681	0.477946	0.49169	28.6125	0.414793	0.368953	0.452036	0.255134	0.22965	0.324355	0.240225	0.431986	0.28422	4.4631	-6.18135	1316
1887	pfkA	b3916	962	1.27001	395.445	311.372	0.246912	0.376383	50.9065	0.417028	0.420817	0.41161	0.370066	0.438043	0.430555	0.420636	0.411467	25.9603	0.509741	0.51646	0.499962	0.524105	0.53834	0.535477	0.562044	0.502467	16.9636	0.424503	0.425342	0.413974	0.401884	0.406876	0.406413	0.431132	0.42253	0.284331	4.20443	-7.88135	181
1894	rpmE	b3936	212	1.71998	5754	3345.39	0.201019	0.286462	1268.01	0.35999	0.340822	0.375856	0.338751	0.324809	0.328132	0.340986	0.373544	347.142	0.478296	0.433969	0.52259	0.493187	0.470451	0.438004	0.479242	0.474629	663.891	0.384918	0.339356	0.424246	0.327975	0.306653	0.337108	0.315089	0.41425	0.26026	3.67278	-7.88135	8253
1915	tufB	b3980	1184	1.56477	31230.8	19958.7	0.212476	0.35853	3270.58	0.420183	0.414613	0.420969	0.261897	0.303831	0.324561	0.306873	0.423493	1690.48	0.51401	0.520234	0.503849	0.303896	0.346449	0.409293	0.363289	0.515489	87.4009	0.938928	0.92087	0.954413	0.54125	0.564844	0.691043	0.522107	0.957894	0.291014	4.88149	-6.18135	1897
1916	secE	b3981	383	0.554137	953.694	1721.04	0.20502	0.387415	279.646	0.441288	0.467519	0.395913	0.404927	0.415375	0.458179	0.402898	0.426866	149.819	0.510536	0.537975	0.46313	0.451886	0.492553	0.530598	0.480221	0.496008	184.073	0.407366	0.441119	0.369332	0.386144	0.405109	0.43168	0.400377	0.398577	0.247811	4.00843	-7.08135	230
1917	nusG	b3982	545	0.948382	1665	1755.63	0.191399	0.385009	322.949	0.476259	0.446512	0.502843	0.351616	0.401703	0.421361	0.37398	0.483489	160.198	0.542524	0.506986	0.573216	0.482722	0.529995	0.480104	0.500455	0.543808	167.225	0.445969	0.409627	0.477551	0.304428	0.346415	0.358674	0.315811	0.45514	0.27025	4.77474	-7.88135	2
1918	rplK	b3983	428	1.29133	12523.5	9698.18	0.158556	0.366262	2353.91	0.414959	0.391464	0.43586	0.370577	0.405888	0.395487	0.412126	0.416825	1051.31	0.500391	0.490506	0.506266	0.426362	0.473768	0.485145	0.466924	0.504109	747.043	0.438262	0.418151	0.455685	0.368612	0.386393	0.386992	0.38693	0.444214	0.283667	4.29386	-7.48135	159
1919	rplA	b3984	704	0.935114	12600.1	13474.4	0.187911	0.354077	2579.15	0.424462	0.428679	0.418226	0.356222	0.344241	0.392092	0.338138	0.430737	1271.23	0.523361	0.512815	0.532219	0.434502	0.452873	0.499947	0.42758	0.529199	829.279	0.424623	0.413448	0.430007	0.326584	0.313754	0.358634	0.310302	0.434866	0.299713	4.7254	-9.48135	4
1920	rplJ	b3985	497	0.639827	14119.4	22067.6	0.192895	0.361569	3968.31	0.508843	0.499115	0.515377	0.364601	0.348056	0.429747	0.356817	0.531063	1902.83	0.572046	0.578081	0.564333	0.364615	0.346086	0.472238	0.379902	0.598344	1952.38	0.468011	0.4656	0.469261	0.280338	0.241651	0.352511	0.295346	0.494969	0.276929	4.69855	-7.78135	413
1921	rplL	b3986	365	1.87034	34118	18241.6	0.172975	0.305753	5032.14	0.340655	0.329403	0.348555	0.250623	0.281701	0.309113	0.27317	0.350743	2142.77	0.441175	0.440304	0.438965	0.428208	0.358723	0.414986	0.427633	0.454314	1958.96	0.395621	0.39729	0.381004	0.342424	0.297863	0.392449	0.357892	0.411602	0.30148	5.99616	-5.18135	67
1922	rpoB	b3987	4028	0.752156	1662.41	2210.2	0.198592	0.372649	184	0.463462	0.448455	0.477699	0.338858	0.356901	0.387941	0.361226	0.464896	166.281	0.521059	0.510257	0.529692	0.427398	0.44769	0.454016	0.426391	0.521863	70.7024	0.456156	0.430545	0.460844	0.305372	0.359527	0.375343	0.345078	0.457413	0.28975	4.68835	-6.18135	320
1923	rpoC	b3988	4223	0.641611	1691.78	2636.76	0.19846	0.391487	274.128	0.473926	0.471775	0.471746	0.37174	0.30289	0.395863	0.366919	0.475664	209.51	0.523288	0.515373	0.531008	0.405836	0.388146	0.468609	0.408784	0.524756	130.016	0.458663	0.457364	0.453478	0.343119	0.276973	0.384528	0.33438	0.459933	0.289172	4.50063	-6.18135	77
1929	hupA	b4000	272	2.56523	6826.65	2661.22	0.166865	0.299485	747.128	0.316299	0.262773	0.361273	0.24128	0.241684	0.268979	0.248718	0.338475	271.778	0.475398	0.466119	0.473092	0.423139	0.417288	0.505822	0.413268	0.493118	220.716	0.393673	0.361398	0.372346	0.356219	0.308191	0.393175	0.345539	0.415197	0.276415	4.71348	-7.38135	187
1956	lexA	b4043	608	0.896491	298.497	332.962	0.264727	0.387056	65.5681	0.463661	0.459136	0.45666	0.449357	0.410783	0.455934	0.440381	0.463991	28.3212	0.532733	0.539787	0.510933	0.570481	0.506052	0.527074	0.5617	0.526673	53.2763	0.463667	0.444493	0.47885	0.423899	0.3892	0.415453	0.432657	0.466142	0.250848	4.84586	-10.1814	110
1969	ssb	b4059	536	2.40367	1232.91	512.928	0.24832	0.410616	111.339	0.421983	0.38789	0.436569	0.324091	0.311707	0.319206	0.347804	0.4331	50.4024	0.565029	0.519803	0.60216	0.352468	0.45416	0.480409	0.424466	0.577419	34.3748	0.463678	0.394538	0.527645	0.250482	0.3381	0.369202	0.304337	0.476397	0.270022	4.74979	-7.78135	3111
1994	groS	b4142	293	1.90969	5888.91	3083.7	0.202582	0.317509	549.048	0.383719	0.382132	0.37892	0.313401	0.31032	0.357551	0.30181	0.400816	235.614	0.505659	0.526555	0.480833	0.442894	0.437302	0.510588	0.428433	0.522698	26.5606	0.427831	0.463671	0.385858	0.348276	0.421063	0.45753	0.389266	0.422962	0.272601	4.54003	-9.88135	1548
1995	groL	b4143	1646	1.67343	6009.84	3591.33	0.187346	0.36181	604.885	0.381721	0.365086	0.398578	0.235607	0.32179	0.340342	0.286913	0.383402	261.452	0.486171	0.456273	0.516286	0.293635	0.411138	0.425195	0.38049	0.48941	45.0482	0.427563	0.393672	0.447394	0.242944	0.316406	0.333731	0.330316	0.430572	0.315976	5.14827	-7.38135	44
1997	efp	b4147	566	1.74504	3757.79	2153.41	0.17987	0.347668	487.393	0.401966	0.408095	0.394427	0.341339	0.359641	0.394162	0.34663	0.402335	203.79	0.485943	0.49279	0.476127	0.410969	0.433333	0.457863	0.406351	0.490442	63.3985	0.383508	0.382397	0.382903	0.276991	0.336729	0.384745	0.322417	0.386813	0.266504	4.68397	-6.18135	2537
2010	miaA	b4171	950	0.0844394	51.9462	615.189	0.377722	0.393295	103.844	0.602147	0.551226	0.567306	0.42506	0.470393	0.494158	0.457401	0.597303	51.9674	0.592265	0.545711	0.56895	0.472843	0.536152	0.52077	0.506053	0.589198	50	0.608823	0.518583	0.53252	0.386415	0.355705	0.392473	0.392928	0.601578	0.19484	3.75439	-0.881351	-7
2011	hfq	b4172	308	2.46466	3092.84	1254.87	0.201233	0.322013	322.877	0.405999	0.387494	0.418933	0.352811	0.454927	0.40268	0.416972	0.394022	125.638	0.473438	0.461242	0.476496	0.365665	0.536498	0.486044	0.434004	0.461031	145.599	0.405555	0.39333	0.412704	0.375842	0.465259	0.456969	0.415822	0.386379	0.208496	3.79655	-7.38135	86
2014	hflC	b4175	1004	0.417035	201.041	482.072	0.226583	0.37245	84.1662	0.42699	0.405089	0.444959	0.333152	0.344885	0.363311	0.348431	0.43083	40.8021	0.511591	0.508698	0.512279	0.440894	0.482591	0.486195	0.474649	0.511759	20.3005	0.447489	0.425987	0.465157	0.403996	0.413435	0.420681	0.426803	0.448457	0.280355	4.68915	-10.1814	3
2016	purA	b4177	1298	1.0158	892.294	878.419	0.230896	0.378875	135.518	0.449318	0.460459	0.427655	0.516297	0.465527	0.460541	0.48686	0.442181	71.1048	0.544607	0.552881	0.527366	0.566034	0.478753	0.492853	0.520809	0.54512	29.4381	0.490168	0.484203	0.462779	0.475407	0.386717	0.404411	0.432205	0.484207	0.269897	4.78859	-1.98135	104
2034	rpsF	b4200	395	1.48126	14924.7	10075.7	0.153131	0.336557	1992.88	0.421606	0.404975	0.428451	0.305935	0.321116	0.335589	0.322047	0.433671	871.279	0.568512	0.543623	0.574592	0.353612	0.476273	0.523613	0.423477	0.576639	1471.39	0.528828	0.493838	0.545779	0.336208	0.396876	0.437286	0.385331	0.542213	0.26619	5.26584	-9.98135	732
2035	priB	b4201	314	0.0103505	81.7289	7896.15	0.189381	0.388981	1499.8	0.56006	0.589688	0.51522	0.534488	0.559414	0.563828	0.52559	0.552887	706.425	0.597782	0.604294	0.585347	0.581477	0.572287	0.578463	0.548645	0.60084	1108.95	0.528282	0.524382	0.525698	0.550558	0.51123	0.533546	0.518129	0.529491	0.174931	2.16331	-3.58135	7
2036	rpsR	b4202	227	1.84224	13484	7319.36	0.16683	0.27141	1677.64	0.39567	0.328455	0.451631	0.369994	0.336459	0.324218	0.360682	0.407333	702.874	0.465552	0.409039	0.512154	0.515411	0.42072	0.400939	0.469387	0.47258	1045.29	0.450054	0.427029	0.467975	0.498904	0.450838	0.440398	0.477191	0.438926	0.287276	2.76141	-6.18135	5
2037	rplI	b4203	449	1.02132	9576.81	9376.87	0.164831	0.346637	1908.97	0.447137	0.426695	0.464083	0.312859	0.322976	0.414574	0.321681	0.460279	718.569	0.496673	0.497991	0.491468	0.381693	0.394183	0.477329	0.389597	0.509611	1209.91	0.459234	0.457677	0.458494	0.339259	0.374077	0.491239	0.368232	0.470028	0.27229	5.24749	-6.98135	42
2039	fklB	b4207	620	2.68992	815.208	303.06	0.240306	0.367371	70.3816	0.380351	0.383705	0.370485	0.412634	0.325909	0.34079	0.398506	0.386775	29.1015	0.495491	0.504431	0.485529	0.568366	0.461394	0.430899	0.550504	0.499188	25.5601	0.40837	0.423855	0.39183	0.44775	0.327079	0.344328	0.433982	0.412691	0.270644	5.12838	-6.08135	837
2044	ytfK	b4217	206	1.07432	231.703	215.675	0.305466	0.278883	52.3285	0.405662	0.395457	0.403761	0.305867	0.412095	0.401172	0.365516	0.398226	19.791	0.512661	0.55905	0.461253	0.502418	0.582342	0.561339	0.544822	0.471178	17.2542	0.430296	0.428794	0.414145	0.404052	0.452091	0.427996	0.430022	0.411771	0.246794	2.80089	-7.78135	942
2047	ytfP	b4222	341	0.662065	162.499	245.442	0.260537	0.353372	50.731	0.451519	0.434442	0.466626	0.305569	0.328956	0.369284	0.314095	0.475827	24.359	0.530638	0.548192	0.50577	0.442237	0.488836	0.49409	0.477152	0.541415	34.4038	0.430367	0.446059	0.412138	0.278926	0.361905	0.398524	0.332694	0.451316	0.200628	3.5676	-2.88135	3
2061	rraB	b4255	416	2.11646	976.059	461.175	0.257561	0.299231	111.779	0.385125	0.3679	0.404569	0.359423	0.29069	0.352019	0.361181	0.398529	47.0568	0.489064	0.460005	0.509832	0.480134	0.369255	0.375635	0.464935	0.510871	53.6718	0.383119	0.353412	0.389227	0.304347	0.217724	0.259412	0.287259	0.399019	0.258929	8.27487	-6.18135	1222
2105	holD	b4372	413	0.18457	40.9753	222.004	0.338794	0.385642	30.372	0.494657	0.489105	0.479269	0.460025	0.431099	0.470161	0.505999	0.492617	15.8099	0.546503	0.529191	0.541035	0.57299	0.498553	0.528921	0.620657	0.540921	22.612	0.489483	0.438789	0.493556	0.435519	0.410174	0.434392	0.47927	0.491865	0.185373	2.99029	-7.78135	1763
2139	rpsT	b0023	263	1.2516	14515.6	11597.6	0.205825	0.286806	2696.02	0.399016	0.393387	0.401742	0.367621	0.348759	0.38772	0.341725	0.407782	1069.06	0.480938	0.466637	0.491112	0.423182	0.402326	0.447226	0.400374	0.498676	850.526	0.43345	0.399612	0.441178	0.314523	0.327169	0.376837	0.317119	0.456857	0.294041	2.58413	-6.18135	13703
2150	surA	b0053	1286	0.965451	357.211	369.994	0.250722	0.372348	77.8516	0.443329	0.437586	0.440758	0.306107	0.366729	0.420184	0.350163	0.446004	35.4089	0.531201	0.527657	0.532065	0.374005	0.450188	0.48067	0.399993	0.53453	18.3254	0.460544	0.477941	0.427358	0.328856	0.337013	0.438864	0.339238	0.465957	0.275279	3.95714	-2.28135	53
2176	speD	b0120	794	1.22159	387.979	317.602	0.216958	0.274723	90.2352	0.352506	0.33588	0.36977	0.249522	0.242881	0.316796	0.262665	0.359571	43.5804	0.433392	0.412245	0.454536	0.315345	0.345407	0.390009	0.329251	0.439318	15.4967	0.354519	0.334027	0.375942	0.306521	0.221285	0.296131	0.307229	0.363295	0.235342	4.28606	-9.98135	16
2177	speE	b0121	866	1.02423	418.27	408.376	0.227156	0.333152	84.7013	0.390493	0.390412	0.381009	0.320662	0.28085	0.304524	0.308903	0.395576	42.1708	0.482985	0.49411	0.466474	0.403162	0.392589	0.416616	0.397594	0.489477	32.4516	0.432095	0.409826	0.361814	0.369342	0.323896	0.321104	0.350229	0.432482	0.229803	4.36615	-13.6814	106
2180	can	b0126	662	1.69943	676.041	397.805	0.219805	0.332054	101.163	0.382194	0.375676	0.375569	0.326194	0.291797	0.314462	0.333118	0.388569	39.643	0.476172	0.469854	0.4754	0.461251	0.424007	0.440954	0.47919	0.478368	20.564	0.406888	0.390661	0.403579	0.418906	0.390834	0.377189	0.417896	0.407093	0.244889	3.83497	-5.08135	3644
2181	panD	b0131	380	2.14655	1187.05	553.005	0.217251	0.343211	137.782	0.40786	0.353325	0.46218	0.342533	0.401288	0.361364	0.367596	0.402699	57.1852	0.500652	0.493473	0.498252	0.418668	0.536453	0.498431	0.473251	0.484376	20.4217	0.435551	0.405333	0.442966	0.358545	0.456152	0.432572	0.406874	0.430015	0.224647	4.27117	-4.88135	1250
2192	pcnB	b0143	1397	0.502046	168.958	336.54	0.248382	0.377437	49.7089	0.446335	0.449341	0.42723	0.347088	0.39331	0.487292	0.375042	0.445886	25.75	0.514058	0.515292	0.50695	0.409424	0.422236	0.52248	0.420944	0.516087	22.6572	0.422632	0.396482	0.387631	0.2538	0.320528	0.415757	0.297281	0.424793	0.26441	3.85956	NA	60
2194	dksA	b0145	455	1.4454	1782.91	1233.51	0.193451	0.35044	289.667	0.399302	0.359597	0.433138	0.321747	0.343133	0.324199	0.38087	0.405537	110.441	0.527194	0.509769	0.543493	0.429983	0.52191	0.463191	0.496202	0.527342	123.54	0.434816	0.393619	0.466469	0.297711	0.339408	0.33313	0.343224	0.441722	0.283124	5.60261	-9.98135	178
2200	mtn	b0159	698	1.59651	555.994	348.256	0.271656	0.365731	79.8412	0.431417	0.433356	0.413983	0.398792	0.445958	0.4724	0.463793	0.411793	33.9387	0.498147	0.50141	0.491154	0.505151	0.503517	0.522398	0.556798	0.486813	18.9133	0.411377	0.403343	0.400371	0.385857	0.387097	0.394362	0.413295	0.408239	0.247397	3.72089	-2.88135	4556
2205	map	b0168	794	1.567	782.501	499.364	0.213113	0.342544	130.487	0.405948	0.397261	0.413793	0.34591	0.405639	0.413482	0.395405	0.405746	44.1752	0.510224	0.477354	0.540533	0.41297	0.438102	0.478181	0.426048	0.515879	17.5752	0.433364	0.398512	0.464579	0.354134	0.388556	0.409353	0.368018	0.432938	0.257835	4.46086	-3.58135	24172
2212	metQ	b0197	815	1.57203	2131.7	1356.02	0.207541	0.321521	497.303	0.351266	0.323253	0.371962	0.266316	0.262088	0.277421	0.244036	0.35712	190.242	0.467864	0.467789	0.45963	0.429261	0.470976	0.463596	0.420729	0.464617	54.8804	0.402272	0.39399	0.401784	0.356331	0.338996	0.365346	0.342733	0.406221	0.279238	4.82961	-7.48135	40
2216	mltD	b0211	1358	0.309928	61.3016	197.793	0.325441	0.382482	46.5202	0.518668	0.531786	0.502925	0.448697	0.466045	0.478222	0.46749	0.520027	21.4966	0.58852	0.603212	0.572508	0.55974	0.510091	0.534656	0.565886	0.5898	26.6117	0.499781	0.543272	0.453997	0.493081	0.449358	0.462194	0.495531	0.497179	0.239643	3.27936	-0.281351	72
2306	ddlA	b0381	1094	1.59185	383.416	240.861	0.271408	0.360009	49.5881	0.39317	0.395169	0.386814	0.309738	0.250701	0.316318	0.31188	0.395571	22.9296	0.501374	0.494491	0.507134	0.426462	0.336834	0.415637	0.411095	0.508558	18.0582	0.438947	0.430938	0.432091	0.337596	0.310141	0.3851	0.361718	0.440961	0.234605	4.33742	-4.98135	3912
2313	tsx	b0411	884	1.62353	893.658	550.441	0.212868	0.334231	129.741	0.367334	0.376561	0.356191	0.443024	0.452642	0.432168	0.438097	0.357261	56.3719	0.47484	0.494349	0.452552	0.544679	0.506035	0.527477	0.534929	0.469103	16.3181	0.390618	0.387313	0.375573	0.416837	0.32707	0.370671	0.388929	0.392154	0.264863	3.44967	-1.98135	299
2318	xseB	b0422	242	1.2043	219.714	182.442	0.274184	0.311983	39.8477	0.447291	0.45929	0.397374	0.449529	0.467154	0.477743	0.445843	0.431264	19.4648	0.509286	0.518271	0.459385	0.559398	0.523348	0.530305	0.541071	0.497077	16.5681	0.426548	0.447542	0.366832	0.41124	0.461973	0.466058	0.418726	0.410054	0.26739	5.85063	-2.98135	1708
2322	cyoE	b0428	890	0.13657	222.816	1631.51	0.249153	0.397596	201.099	0.518744	0.540132	0.481311	0.430614	0.463535	0.50322	0.462792	0.520393	151.538	0.554375	0.55369	0.537572	0.476596	0.482825	0.522151	0.509265	0.560218	91.777	0.492966	0.525203	0.424995	0.461576	0.511874	0.563143	0.506392	0.475919	0.244195	2.13152	-4.98135	12
2323	cyoD	b0429	329	0.700873	1269.18	1810.85	0.196796	0.344468	286.909	0.41944	0.436033	0.399646	0.351097	0.35376	0.418927	0.342231	0.433747	210.19	0.502939	0.509729	0.49057	0.433082	0.402487	0.494918	0.402655	0.524402	101.237	0.421273	0.427553	0.408383	0.309828	0.311923	0.397411	0.304055	0.442739	0.267097	2.1367	-8.58135	0
2324	cyoC	b0430	614	0.478154	792.839	1658.12	0.214476	0.390782	202.348	0.425902	0.445446	0.397144	0.311977	0.315055	0.395778	0.306722	0.43495	142.132	0.49747	0.507729	0.478715	0.384827	0.357069	0.438625	0.361165	0.516784	77.1043	0.431383	0.441394	0.418046	0.297402	0.315866	0.387398	0.293527	0.446643	0.243916	2.52794	-9.48135	-10
2325	cyoB	b0431	1991	0.346232	633.328	1829.2	0.205905	0.373179	209.526	0.425595	0.43944	0.411804	0.329279	0.394709	0.42091	0.36181	0.421233	163.517	0.499361	0.51032	0.488616	0.468654	0.479028	0.523521	0.468908	0.496491	48.1116	0.42598	0.441457	0.410128	0.319014	0.333503	0.367722	0.330121	0.425543	0.256087	2.37218	-7.48135	22
2326	cyoA	b0432	947	0.546985	1101.14	2013.12	0.177642	0.32226	372.344	0.431997	0.421523	0.435047	0.240853	0.311507	0.338603	0.315656	0.435107	219.877	0.523447	0.524412	0.519224	0.397409	0.493684	0.518487	0.468097	0.523153	81.061	0.478842	0.469056	0.440763	0.281552	0.325545	0.364981	0.310645	0.483175	0.248825	3.1815	-7.88135	460
2363	ppiB	b0525	494	1.88382	1934.95	1027.14	0.209213	0.303522	241.566	0.368294	0.338944	0.391004	0.298787	0.266333	0.318156	0.290047	0.378845	108.54	0.487145	0.450081	0.506583	0.417316	0.424027	0.421443	0.424643	0.493919	20.1118	0.410826	0.410546	0.406313	0.241041	0.282181	0.343995	0.264693	0.426416	0.285345	4.23005	-5.18135	1595
2365	ybcJ	b0528	212	1.6614	364.708	219.519	0.24475	0.371698	58.6197	0.430784	0.434952	0.422983	0.309824	0.349089	0.420665	0.318895	0.450076	24.7541	0.585501	0.585221	0.583021	0.381414	0.505709	0.578488	0.435163	0.601656	16.929	0.42473	0.470173	0.37315	0.324708	0.406053	0.451899	0.354333	0.42968	0.236644	4.75388	-5.18135	2
2366	folD	b0529	866	1.68072	292.735	174.173	0.265684	0.373291	44.9758	0.42869	0.443453	0.409551	0.315364	0.360417	0.400956	0.344887	0.431759	19.4612	0.517529	0.529693	0.50326	0.461148	0.474945	0.505922	0.493798	0.520407	21.3405	0.457169	0.458331	0.415394	0.322471	0.350342	0.391339	0.343548	0.456476	0.24597	4.06306	-3.58135	6107
2374	borD	b0557	293	2.41954	2265.4	936.294	0.203992	0.256382	247.439	0.302315	0.255692	0.338835	0.359237	0.254777	0.240515	0.328353	0.3113	103.754	0.463512	0.451382	0.472378	0.531739	0.455734	0.436167	0.51522	0.459613	30.2538	0.388698	0.378701	0.39224	0.45176	0.365249	0.37567	0.418492	0.38054	0.214988	3.42961	-3.58135	291
2378	ompT	b0565	953	2.09434	3655.27	1745.31	0.194616	0.277041	378.97	0.316407	0.327707	0.302239	0.408792	0.336461	0.357947	0.403355	0.314448	210.653	0.441637	0.436507	0.44474	0.470797	0.468981	0.489852	0.481994	0.43707	99.5801	0.353193	0.325526	0.378329	0.351424	0.269708	0.316977	0.35005	0.35101	0.204546	3.21267	-6.18135	514
2413	lipA	b0628	965	1.48317	907.711	612.007	0.233437	0.356124	119.768	0.408416	0.398762	0.417779	0.330716	0.384734	0.399579	0.331918	0.407314	57.2382	0.498154	0.507524	0.487627	0.492011	0.507216	0.507574	0.483998	0.494755	23.1314	0.449819	0.432753	0.439504	0.346953	0.385432	0.423418	0.349129	0.444913	0.25203	4.25721	-3.58135	209
2422	ybeB	b0637	317	1.52467	736.567	483.099	0.22046	0.385931	86.522	0.394433	0.365544	0.421023	0.358846	0.335132	0.331371	0.360714	0.406612	46.0938	0.508645	0.50832	0.505308	0.491925	0.499936	0.497223	0.492917	0.506935	26.8993	0.41458	0.383513	0.431133	0.366224	0.366359	0.366107	0.362934	0.421319	0.25384	4.73293	-10.1814	260
2441	miaB	b0661	1424	1.46332	421.246	287.869	0.256469	0.38184	53.7305	0.431222	0.449182	0.412454	0.263977	0.325072	0.357647	0.315328	0.436691	30.0595	0.536985	0.543253	0.53048	0.454802	0.468752	0.482511	0.493369	0.54078	28.3348	0.44198	0.458775	0.414108	0.314942	0.401589	0.406792	0.405089	0.439802	0.264969	4.72674	-2.88135	2558
2447	fur	b0683	446	0.919553	634.629	690.149	0.214805	0.304686	167.025	0.412713	0.411773	0.407044	0.347608	0.398981	0.403462	0.364349	0.411693	64.1727	0.498752	0.507366	0.483586	0.441749	0.47103	0.491675	0.442762	0.501112	211.031	0.389971	0.405825	0.365284	0.322978	0.358795	0.37819	0.342468	0.391324	0.245335	5.27461	-5.18135	-7
2472	gpmA	b0755	752	1.89661	2289.44	1207.12	0.196931	0.34488	218.728	0.35455	0.339817	0.366273	0.335115	0.264657	0.303514	0.291254	0.360997	90.6155	0.50236	0.511729	0.492144	0.479883	0.416522	0.45052	0.416499	0.508884	39.9751	0.426177	0.436947	0.413931	0.405587	0.343167	0.399046	0.358262	0.428241	0.262558	4.77051	-10.0814	202
2507	ybiS	b0819	920	1.99181	423.389	212.564	0.235333	0.366174	59.8762	0.384326	0.375461	0.392152	0.342505	0.3555	0.416949	0.343155	0.385419	31.8822	0.500996	0.482414	0.515107	0.432002	0.418329	0.475403	0.434486	0.504588	21.1369	0.439891	0.427439	0.451535	0.366684	0.365604	0.402139	0.367529	0.443383	0.249592	4.21494	-1.68135	2052
2539	infA	b0884	218	1.73701	2869.15	1651.78	0.205327	0.275826	341.018	0.378664	0.381502	0.366511	0.342572	0.373774	0.386807	0.36764	0.371244	160.899	0.490441	0.507078	0.471487	0.43236	0.474818	0.506647	0.451437	0.490787	335.513	0.385425	0.349445	0.414871	0.34371	0.352187	0.349134	0.349187	0.395244	0.291612	3.92693	-6.18135	285
2543	trxB	b0888	965	1.02073	709.363	694.954	0.215026	0.365627	129.234	0.429477	0.456047	0.398853	0.346343	0.386956	0.461693	0.401954	0.43129	54.0256	0.512206	0.526769	0.496097	0.491353	0.442575	0.554895	0.5195	0.515135	44.1741	0.425834	0.425089	0.41794	0.405744	0.329348	0.402834	0.416059	0.431036	0.254735	4.63831	-5.28135	12881
2547	pflB	b0903	2282	1.26669	764.556	603.588	0.212546	0.333265	93.3031	0.399847	0.393286	0.405935	0.313198	0.309074	0.346736	0.304326	0.400124	50.9245	0.500689	0.493766	0.506586	0.438026	0.447295	0.473278	0.414121	0.50038	16.6689	0.450496	0.419032	0.465355	0.325311	0.367856	0.374416	0.337119	0.452017	0.295471	3.93461	-9.88135	55
2552	ompF	b0929	1088	1.98581	6809	3428.82	0.19661	0.336415	1028.94	0.38088	0.396778	0.361039	0.362435	0.425479	0.371936	0.389083	0.377379	334.36	0.490899	0.485522	0.491429	0.501539	0.593519	0.507514	0.5352	0.48251	113.316	0.415356	0.433274	0.397754	0.427545	0.485876	0.423707	0.444743	0.41024	0.27333	4.26747	-5.58135	603
2553	asnS	b0930	1400	1.11921	1182.5	1056.55	0.211375	0.371086	172.016	0.427722	0.418577	0.433424	0.362726	0.442776	0.446556	0.403929	0.426423	90.9832	0.53353	0.52535	0.540515	0.466961	0.560561	0.550823	0.500029	0.53153	15.5259	0.463131	0.462366	0.463342	0.349779	0.476224	0.447694	0.409229	0.459828	0.253297	4.85482	-3.98135	169
2561	fabA	b0954	518	1.52881	1937.6	1267.39	0.234428	0.384768	290.239	0.41663	0.376527	0.451326	0.305149	0.283009	0.334847	0.326809	0.435207	113.333	0.519946	0.503304	0.531307	0.456747	0.383164	0.428961	0.458253	0.538662	108.067	0.43648	0.429904	0.437748	0.371437	0.306428	0.393106	0.378401	0.453771	0.29582	4.62755	-5.48135	69
2563	ompA	b0957	1040	1.25323	13316.4	10625.7	0.187559	0.367644	2254.69	0.40048	0.392623	0.403662	0.293408	0.378173	0.369481	0.335683	0.400787	956.936	0.488706	0.491447	0.482505	0.406711	0.457701	0.447067	0.457407	0.488937	737.756	0.412111	0.405962	0.410626	0.351306	0.398797	0.386937	0.400378	0.408982	0.274437	3.87091	-6.78135	357
2569	hspQ	b0966	317	0.342666	91.344	266.568	0.241252	0.371577	44.805	0.522617	0.571551	0.4776	0.485541	0.489392	0.541117	0.488235	0.522432	21.8889	0.555356	0.610045	0.508506	0.515412	0.524161	0.563315	0.524072	0.560627	25.5174	0.474843	0.480233	0.459279	0.409751	0.421752	0.4277	0.422714	0.471309	0.224574	4.58337	-11.1814	58
2664	dsbB	b1185	530	0.876924	150.961	172.149	0.30715	0.372528	31.9416	0.450309	0.424736	0.469742	0.400146	0.320181	0.358518	0.389132	0.458757	15.5629	0.541231	0.525406	0.55469	0.511994	0.41358	0.452837	0.503675	0.553624	21.1198	0.436509	0.430979	0.440856	0.474318	0.399863	0.392643	0.464961	0.439072	0.215346	2.33856	-5.78135	146
2678	prs	b1207	947	0.942056	1325.37	1406.89	0.190827	0.365945	246.321	0.45637	0.434263	0.473599	0.307247	0.344476	0.383103	0.33281	0.462997	129.618	0.543853	0.521253	0.564542	0.34022	0.367463	0.370227	0.366382	0.554674	60.5174	0.459994	0.437093	0.479006	0.253075	0.295228	0.342233	0.278843	0.469176	0.264824	4.07184	-7.88135	151
2691	hns	b1237	413	10.6542	8408.88	789.253	0.184927	0.276586	693.983	0.354441	0.323465	0.379743	0.267915	0.285985	0.266452	0.296251	0.36381	157.174	0.511289	0.497591	0.520266	0.321512	0.373108	0.38075	0.368931	0.529509	317.065	0.397994	0.369672	0.413395	0.24692	0.331371	0.302242	0.32425	0.404107	0.282685	5.26199	-2.28135	2215
2714	yciN	b1273	251	3.44799	557.96	161.822	0.246687	0.276892	62.0913	0.355301	0.347473	0.354493	0.356137	0.314077	0.344962	0.335511	0.369708	25.4865	0.491567	0.494361	0.468854	0.492159	0.43871	0.500114	0.460352	0.51102	30.6396	0.364825	0.371669	0.354658	0.371853	0.308913	0.359894	0.338284	0.383984	0.248867	5.34539	-9.98135	7902
2722	fabI	b1288	788	1.89236	3199	1690.48	0.17532	0.360888	338.444	0.376901	0.361193	0.390317	0.269011	0.322742	0.313187	0.312251	0.379807	152.717	0.493787	0.479435	0.506387	0.384713	0.484935	0.530598	0.446715	0.493768	28.0619	0.407074	0.375614	0.37838	0.220004	0.296914	0.339878	0.290197	0.413235	0.260644	4.03533	-7.38135	368
2734	tpx	b1324	506	2.67044	3565.13	1335.04	0.188964	0.329526	380.095	0.377414	0.347887	0.402219	0.347232	0.373125	0.353944	0.354273	0.377546	143.872	0.472593	0.440272	0.502995	0.42466	0.40858	0.446059	0.421671	0.482332	68.501	0.369674	0.348191	0.388636	0.282753	0.319674	0.357064	0.331193	0.377197	0.244164	4.0996	-5.18135	1059
2740	fnr	b1334	752	1.12139	597.964	533.235	0.250128	0.339229	118.782	0.413149	0.390904	0.428043	0.405004	0.383168	0.418802	0.425331	0.411146	57.0138	0.480461	0.483399	0.471005	0.540011	0.471858	0.522912	0.563478	0.472797	27.7331	0.416854	0.390213	0.419091	0.387657	0.345213	0.44533	0.417386	0.403345	0.25554	3.10596	-2.88135	195
2852	gnsB	b1550	173	5.09789	353.709	69.3834	0.352913	0.153237	45.1667	0.330685	0.274367	0.315816	0.247334	0.27821	0.304464	0.30069	0.307896	20.7292	0.425534	0.358155	0.424616	0.30323	0.334338	0.378622	0.330894	0.435415	17.0486	0.343132	0.27719	0.307759	0.234957	0.283789	0.291176	0.265618	0.35268	0.249818	4.51353	-6.18135	172
2891	tyrS	b1637	1274	1.16482	605.738	520.025	0.240611	0.366272	101.336	0.421736	0.437386	0.395621	0.335728	0.362826	0.368304	0.371603	0.42409	52.7759	0.515881	0.526922	0.498045	0.444924	0.508448	0.515963	0.468006	0.515624	42.8908	0.448066	0.452226	0.424206	0.318916	0.354804	0.405232	0.340724	0.448549	0.256829	4.01489	-6.18135	129
2899	grxD	b1654	347	2.58171	1284.48	497.533	0.19467	0.342939	147.911	0.347045	0.292216	0.386192	0.232866	0.217915	0.260157	0.233533	0.371321	54.3491	0.496621	0.466109	0.527372	0.320933	0.370271	0.422016	0.359106	0.524039	43.9403	0.38828	0.360882	0.411603	0.2398	0.274106	0.326489	0.265567	0.417756	0.271536	4.15378	-7.48135	2020
2930	ihfA	b1712	299	0.556895	607.194	1090.32	0.209582	0.316522	211.933	0.416157	0.359565	0.419927	0.265509	0.314305	0.315805	0.305721	0.432631	95.8	0.454087	0.390777	0.457727	0.361623	0.370504	0.37482	0.397231	0.466684	93.5074	0.429225	0.319371	0.428669	0.308973	0.303012	0.31209	0.325269	0.440789	0.240928	5.46151	-5.78135	5
2931	pheT	b1713	2387	1.20074	879.611	732.557	0.244169	0.389589	82.0465	0.463903	0.431513	0.481049	0.267583	0.364065	0.398176	0.314957	0.466407	58.5254	0.5152	0.516706	0.512842	0.367651	0.414966	0.487523	0.397349	0.5173	15.1951	0.608261	0.465082	0.623609	0.378654	0.374891	0.432036	0.403576	0.611466	0.257814	4.66268	-9.48135	15
2934	rplT	b1716	356	1.00117	13177.5	13162.1	0.185574	0.331096	3079.57	0.436185	0.400385	0.458402	0.451526	0.366711	0.409249	0.383694	0.44905	1186.63	0.550967	0.544122	0.551815	0.599751	0.516319	0.558218	0.547196	0.557416	1074.2	0.464295	0.451179	0.457289	0.421383	0.398686	0.469101	0.397166	0.473856	0.302467	2.31109	-7.78135	53
2935	rpmI	b1717	197	1.52167	18444.2	12121	0.166483	0.286091	3229.46	0.424179	0.421258	0.421373	0.418085	0.422323	0.420554	0.406484	0.413116	1237.05	0.530652	0.500882	0.555681	0.49038	0.482304	0.50299	0.46966	0.545954	1072.79	0.476434	0.448549	0.493685	0.380687	0.424922	0.445905	0.412432	0.495364	0.306844	3.54259	-4.68135	97
2936	infC	b1718	542	0.243334	2122.99	8724.62	0.404228	0.333875	1758.45	0.638463	0.455186	0.56284	0.335656	0.370645	0.37908	0.350908	0.630868	818.277	0.632413	0.442048	0.576656	0.328446	0.409192	0.430068	0.374773	0.629827	665.702	0.609733	0.396057	0.517009	0.304234	0.313185	0.32961	0.31667	0.602218	0.256134	4.65434	NA	4
2937	thrS	b1719	1928	0.944424	1293.56	1369.69	0.248522	0.345742	165.555	0.486666	0.407873	0.543966	0.342048	0.335786	0.384018	0.344046	0.491049	104.911	0.543158	0.483415	0.582531	0.458269	0.462307	0.508688	0.449649	0.545425	44.3144	0.547405	0.429884	0.56987	0.337215	0.340666	0.418492	0.366324	0.553143	0.257723	4.37569	-7.38135	2755
2973	mipA	b1782	746	2.30451	1691.39	733.948	0.209081	0.338391	170.056	0.372156	0.381007	0.361994	0.319959	0.389976	0.41132	0.374303	0.367807	79.6932	0.514112	0.521651	0.50506	0.506975	0.529675	0.56249	0.519463	0.510924	30.3431	0.419598	0.420303	0.408523	0.335756	0.389508	0.442753	0.380266	0.42132	0.26005	3.85252	-7.38135	7606
2990	cspC	b1823	209	4.08544	10240.5	2506.58	0.204847	0.309569	862.21	0.333342	0.283505	0.375056	0.218449	0.199266	0.277241	0.21609	0.369702	311.289	0.507913	0.474611	0.529531	0.318898	0.390795	0.470751	0.366102	0.544456	148.806	0.428271	0.408642	0.411069	0.267314	0.368211	0.404097	0.363983	0.437495	0.251762	4.19446	-7.38135	13
2992	yebO	b1825	287	0.712911	187.84	263.483	0.301842	0.289338	53.3576	0.409646	0.396334	0.407874	0.499401	0.416379	0.421033	0.487624	0.390991	25.6279	0.474949	0.449306	0.47403	0.519228	0.409154	0.450382	0.512133	0.459133	31.5969	0.404548	0.386631	0.382392	0.478996	0.320311	0.419394	0.460858	0.373504	0.220149	3.64255	-7.88135	75
2997	proQ	b1831	698	1.1141	1276.58	1145.84	0.200841	0.349799	229.631	0.403699	0.413018	0.392374	0.268559	0.336884	0.428975	0.326812	0.406732	103.755	0.469875	0.470618	0.467787	0.361329	0.390404	0.476648	0.395934	0.476215	60.8117	0.40041	0.405319	0.395118	0.338667	0.359116	0.402798	0.344256	0.402325	0.242234	4.78758	-5.18135	97
3007	eda	b1850	641	1.83778	764.14	415.796	0.239423	0.388456	82.6308	0.388099	0.370807	0.396227	0.303086	0.321711	0.327058	0.343127	0.395256	39.5408	0.578291	0.56409	0.588467	0.453503	0.483291	0.512183	0.508927	0.587879	33.3725	0.453189	0.452731	0.452754	0.369174	0.403869	0.440517	0.423487	0.456707	0.261126	4.29316	-2.88135	37
3012	znuA	b1857	932	2.32682	6156.54	2645.9	0.196192	0.34633	33.9571	0.372133	0.372062	0.371697	0.398616	0.365393	0.415654	0.407797	0.371579	45.8771	0.504386	0.500836	0.506911	0.522703	0.458462	0.509287	0.53373	0.50652	15.1772	0.449889	0.461426	0.429141	0.403804	0.40823	0.433307	0.447892	0.453134	0.192887	4.51302	-3.38135	1763
3015	ruvC	b1863	521	0.0806802	33.2172	411.714	0.246934	0.416641	61.6609	0.527954	0.546254	0.506739	0.504541	0.615991	0.632101	0.571503	0.507952	33.9817	0.541434	0.551935	0.525706	0.519791	0.609228	0.640682	0.567555	0.518675	16.7033	0.465373	0.47517	0.454749	0.407869	0.541444	0.581535	0.489459	0.455235	0.237471	3.82965	-6.18135	35
3016	yebC	b1864	740	1.51694	1169.82	771.167	0.215532	0.355054	123.265	0.376965	0.365042	0.386976	0.30548	0.304275	0.288284	0.33574	0.385379	68.173	0.49192	0.500772	0.48116	0.368435	0.412007	0.417005	0.403687	0.49964	22.7764	0.424019	0.415907	0.428979	0.282602	0.311507	0.313039	0.333271	0.427379	0.281225	5.66777	-6.18135	29
3017	nudB	b1865	452	0.0444141	23.0841	519.747	0.24808	0.392788	51.8168	0.55454	0.557985	0.546959	0.565281	0.498589	0.551045	0.532456	0.559746	38.9409	0.569856	0.59767	0.518986	0.613543	0.601004	0.622311	0.603429	0.560872	17.331	0.498006	0.535705	0.453765	0.544254	0.513803	0.581343	0.511327	0.493381	0.212458	4.42443	-6.18135	118
3059	yedD	b1928	413	1.75691	448.994	255.56	0.269442	0.399225	48.3261	0.449289	0.433207	0.465724	0.466802	0.397192	0.476289	0.451044	0.44714	19.1901	0.607562	0.597331	0.612361	0.638061	0.537923	0.603886	0.624066	0.610979	25.6406	0.515962	0.510647	0.518823	0.549645	0.511941	0.527469	0.553056	0.491685	0.245344	4.4139	-3.68135	3947
3090	yeeX	b2007	329	2.30509	829.098	359.682	0.238279	0.273678	118.288	0.339517	0.322044	0.354639	0.307996	0.370905	0.333024	0.337014	0.332786	47.6667	0.448215	0.463983	0.428687	0.445141	0.496252	0.470693	0.476936	0.432813	18.5067	0.364814	0.327182	0.389674	0.266467	0.324221	0.331393	0.312833	0.374877	0.325439	5.0572	-7.78135	172
3096	yeeF	b2014	1358	0.530865	838.81	1580.08	0.210165	0.365825	267.595	0.415496	0.396701	0.432568	0.338966	0.370586	0.383241	0.392131	0.417265	169.263	0.516591	0.509663	0.521904	0.461105	0.522334	0.511684	0.530289	0.513515	18.5688	0.450158	0.453873	0.420099	0.354249	0.477932	0.453825	0.473256	0.433715	0.256332	2.8337	-8.68135	267
3101	cld	b2027	980	0.643252	380.22	591.091	0.238973	0.318531	146.147	0.348202	0.33161	0.364541	0.28632	0.295062	0.325406	0.334151	0.350521	69.9863	0.450194	0.457176	0.441914	0.404227	0.399981	0.417599	0.465562	0.452269	66.9737	0.407051	0.413816	0.386971	0.338511	0.32328	0.357083	0.362401	0.411035	0.228309	3.67632	-3.68135	146
3103	gnd	b2029	1406	1.2931	2021.96	1563.65	0.18608	0.34564	324.529	0.365262	0.350821	0.378158	0.265805	0.329157	0.366145	0.296912	0.365109	158.405	0.471342	0.481235	0.459455	0.389572	0.42924	0.46108	0.410314	0.471965	39.398	0.389519	0.383431	0.389472	0.343824	0.355065	0.375181	0.351387	0.389954	0.260269	4.21536	-7.78135	1673
3107	wbbK	b2032	1118	0.784499	54.4298	69.3816	0.344002	0.242487	32.0965	0.334538	0.332191	0.335285	0.335027	0.411961	0.351543	0.370856	0.327491	16.3939	0.487805	0.492784	0.48026	0.487202	0.582428	0.523542	0.549644	0.479477	22.7264	0.35318	0.34568	0.359514	0.341638	0.320978	0.313791	0.339441	0.354483	0.193693	2.46524	-2.88135	-15
3108	wbbJ	b2033	590	0.579634	77.5527	133.796	0.300669	0.27222	40.489	0.369157	0.356196	0.377522	0.231607	0.239579	0.274029	0.240039	0.3804	22.4171	0.454562	0.451715	0.455403	0.380289	0.375991	0.372153	0.386196	0.458707	24.8217	0.360852	0.332237	0.373555	0.239392	0.231374	0.25416	0.247441	0.362726	0.174671	2.53001	-8.58135	-19
3109	wbbI	b2034	992	1.92013	214.178	111.544	0.304111	0.262218	54.9416	0.314989	0.321106	0.30838	0.243754	0.30995	0.304098	0.294453	0.312734	29.5171	0.456683	0.480894	0.431392	0.397014	0.356899	0.413027	0.381583	0.461262	28.9564	0.366233	0.38963	0.343006	0.293944	0.264934	0.288264	0.300475	0.371452	0.170768	2.99371	-0.0813514	3
3110	rfc	b2035	1166	0.204972	15.6	76.1082	0.37102	0.246441	26.0805	0.390243	0.360213	0.399104	0.324983	0.357338	0.399916	0.370111	0.391208	18.1856	0.447742	0.451566	0.431568	0.415377	0.448021	0.478378	0.432809	0.446687	18.3131	0.341606	0.3408	0.331925	0.320705	0.353757	0.37812	0.330138	0.34055	0.180177	0.139362	-3.28135	0
3111	glf	b2036	1103	2.09141	278.185	133.014	0.321061	0.250082	52.5553	0.307954	0.319847	0.282064	0.273281	0.256122	0.240916	0.284147	0.308992	29.6881	0.42762	0.443313	0.400114	0.380236	0.418159	0.385598	0.414211	0.427199	19.6304	0.345326	0.364225	0.320175	0.298966	0.327291	0.308261	0.320894	0.343383	0.200343	3.56053	-6.18135	8
3113	rfbC	b2038	557	0.883709	163.241	184.722	0.266465	0.285583	48.9839	0.334392	0.340183	0.324544	0.206755	0.239801	0.292175	0.236785	0.335375	26.3883	0.465094	0.496868	0.42176	0.368756	0.469239	0.54567	0.434135	0.449355	16.233	0.391217	0.407421	0.358213	0.335188	0.367723	0.414649	0.371844	0.383055	0.176186	4.08712	-6.08135	0
3114	rfbA	b2039	881	1.41993	345.215	243.122	0.26809	0.304642	56.6939	0.345914	0.35956	0.331406	0.229311	0.242767	0.265628	0.230658	0.350823	32.7477	0.468872	0.483467	0.449731	0.229084	0.252931	0.339086	0.224402	0.479425	15.1244	0.404166	0.409964	0.387673	0.337303	0.264608	0.322344	0.302426	0.408241	0.21417	3.58273	-6.08135	58
3116	rfbB	b2041	1085	1.43314	466.509	325.516	0.241019	0.307419	81.3564	0.349157	0.342419	0.355208	0.261164	0.286492	0.281418	0.269886	0.35038	43.7831	0.44536	0.443835	0.444244	0.368908	0.446105	0.372677	0.418394	0.443693	16.7737	0.386709	0.372416	0.394897	0.280147	0.31195	0.285578	0.30456	0.38732	0.200898	4.1928	-3.58135	373
3117	galF	b2042	893	0.899814	557.889	620.005	0.229819	0.345733	119.464	0.41749	0.446268	0.382649	0.405821	0.388081	0.439304	0.407748	0.411896	60.2164	0.521503	0.543596	0.493035	0.581129	0.483494	0.53748	0.543586	0.516946	15.3438	0.465539	0.481612	0.400392	0.446785	0.393791	0.434235	0.423685	0.454739	0.248143	3.74189	-6.88135	175
3167	mrp	b2113	1109	1.19985	396.367	330.346	0.252074	0.383995	56.8297	0.430008	0.432422	0.423666	0.406448	0.445992	0.406964	0.430767	0.429003	31.9315	0.539813	0.528356	0.547561	0.536587	0.518568	0.533848	0.551576	0.541296	16.6778	0.437443	0.448421	0.424968	0.358839	0.394091	0.406918	0.384734	0.440429	0.245059	3.94159	-8.68135	17558
3187	folE	b2153	668	2.28761	1808.01	790.347	0.215883	0.320434	148.531	0.367089	0.364993	0.368596	0.33018	0.366596	0.363574	0.351799	0.36645	63.9687	0.45644	0.447394	0.465338	0.420729	0.479556	0.448449	0.431175	0.454099	19.5258	0.41738	0.385006	0.414945	0.351156	0.368545	0.376182	0.353471	0.414604	0.231092	4.36299	-7.78135	1126
3200	yejG	b2181	344	1.23027	225.087	182.957	0.324017	0.305581	38.1014	0.395847	0.362343	0.412976	0.356828	0.320009	0.344422	0.354141	0.41226	17.1937	0.461734	0.433622	0.485245	0.487357	0.456699	0.416546	0.472019	0.461432	63.1746	0.396382	0.373552	0.40249	0.272858	0.27714	0.33426	0.300362	0.422625	0.173009	3.00413	-5.28135	333
3227	ompC	b2215	1103	1.57222	13376.5	8508.01	0.183244	0.341623	1745.35	0.377555	0.350222	0.402274	0.295544	0.375351	0.357388	0.337996	0.376794	913.391	0.485125	0.469969	0.499178	0.45065	0.542002	0.503722	0.479316	0.481416	384.541	0.436935	0.409132	0.461326	0.328169	0.422663	0.454669	0.37175	0.4357	0.301901	3.84835	-6.58135	4278
3234	gyrA	b2231	2627	0.573082	416.702	727.124	0.222305	0.390544	104.393	0.469749	0.470478	0.468847	0.374812	0.413622	0.465643	0.402371	0.471053	60.0069	0.542746	0.542811	0.541958	0.469197	0.511034	0.572677	0.486282	0.543209	22.3618	0.491668	0.490578	0.465307	0.341532	0.371315	0.427022	0.355814	0.487968	0.272699	4.96849	-7.18135	997
3262	nuoJ	b2280	554	0.250629	92.5793	369.388	0.290739	0.401769	27.5207	0.477051	0.469789	0.481738	0.356619	0.412603	0.428922	0.418812	0.484328	30.7429	0.558813	0.578066	0.533361	0.433442	0.489238	0.523254	0.483717	0.564232	15.0762	0.461574	0.435807	0.479459	0.315314	0.384586	0.389533	0.361555	0.46908	0.245078	2.76673	-9.98135	12
3269	nuoB	b2287	662	0.900337	435.952	484.21	0.244921	0.3729	77.2896	0.438518	0.439859	0.431137	0.320079	0.398499	0.407638	0.392976	0.441979	41.8578	0.546522	0.538774	0.553172	0.373701	0.426277	0.455419	0.429578	0.556425	20.9874	0.500456	0.473352	0.483298	0.284506	0.344721	0.368117	0.35023	0.517623	0.259378	3.72838	-6.18135	16
3270	nuoA	b2288	443	0.776855	212.635	273.712	0.239306	0.347111	53.223	0.448357	0.432979	0.457037	0.347223	0.338246	0.348726	0.350839	0.464051	28.7126	0.53953	0.556843	0.516429	0.434698	0.46961	0.472964	0.479492	0.549879	26.2295	0.40508	0.386571	0.414225	0.33009	0.296774	0.281683	0.336283	0.42173	0.247674	2.54461	-3.58135	631
3276	yfcD	b2299	542	0.99375	246.107	247.655	0.270263	0.355129	45.3186	0.437708	0.407334	0.462575	0.282205	0.299868	0.366368	0.305354	0.449918	21.4795	0.522651	0.521845	0.514878	0.420674	0.421785	0.505125	0.426975	0.53233	15.9103	0.483979	0.458221	0.507375	0.435312	0.416044	0.45736	0.419793	0.489268	0.255628	4.56512	-6.88135	58
3277	yfcE	b2300	554	0.773458	161.762	209.142	0.293486	0.373285	36.1423	0.444427	0.42636	0.458172	0.364202	0.348562	0.355513	0.400416	0.44829	17.8686	0.588261	0.555341	0.618736	0.562045	0.512701	0.542164	0.567809	0.595755	19.8724	0.494123	0.486624	0.484801	0.421166	0.4032	0.421426	0.45868	0.464904	0.22237	3.48734	-6.18135	53
3290	accD	b2316	914	0.88055	751.455	853.393	0.220469	0.389223	142.976	0.46209	0.46692	0.450018	0.356812	0.404691	0.39742	0.385995	0.464368	69.3514	0.565823	0.572803	0.542748	0.453292	0.510387	0.495079	0.486939	0.568331	34.0294	0.47706	0.496656	0.443862	0.343723	0.414412	0.393747	0.391315	0.473113	0.25043	4.12384	-4.98135	156
3296	fabB	b2323	1220	1.28383	1318.12	1026.71	0.209568	0.387672	143.512	0.433092	0.447152	0.41628	0.404839	0.381456	0.395481	0.38284	0.432547	83.0336	0.507221	0.510763	0.503096	0.524124	0.521514	0.540869	0.515469	0.504749	18.0982	0.514956	0.525066	0.435873	0.32356	0.353561	0.350704	0.337985	0.501494	0.274336	3.94261	-7.88135	2286
3302	prmB	b2330	932	1.06802	243.671	228.152	0.269789	0.368777	34.4716	0.419879	0.423964	0.399849	0.442421	0.352145	0.398647	0.425291	0.414718	17.5105	0.53753	0.5188	0.555357	0.523451	0.413492	0.476491	0.499581	0.543272	19.9967	0.453629	0.436161	0.453275	0.35391	0.291238	0.404063	0.347205	0.448625	0.24015	4.75225	-9.48135	788
3313	yfcZ	b2343	284	3.07909	626.881	203.593	0.272318	0.327042	47.5193	0.417241	0.411174	0.421966	0.350758	0.330061	0.425619	0.361914	0.416324	21.7529	0.599469	0.590922	0.60616	0.433318	0.412346	0.552756	0.42215	0.625896	34.298	0.529589	0.546285	0.510244	0.395223	0.370387	0.488229	0.391619	0.544911	0.238851	4.41183	-5.18135	3318
3345	zipA	b2412	986	0.302158	120.638	399.256	0.239304	0.383621	62.9564	0.459548	0.481175	0.434368	0.359045	0.496699	0.495185	0.444965	0.457268	27.7106	0.535903	0.548352	0.52172	0.395009	0.63059	0.613475	0.50005	0.526971	36.5946	0.459163	0.465809	0.422319	0.270796	0.44539	0.476043	0.353889	0.455394	0.208949	4.08184	-2.88135	5153
3354	yfeX	b2431	899	1.14369	292.995	256.183	0.245734	0.379399	35.5733	0.442819	0.446176	0.434566	0.357418	0.378323	0.453159	0.378123	0.44606	18.0011	0.549158	0.545319	0.546644	0.330452	0.402315	0.467642	0.36302	0.557657	18.292	0.436005	0.436052	0.428205	0.364269	0.356573	0.431927	0.354135	0.439598	0.252647	4.99008	-11.0814	96
3384	bamC	b2477	1034	0.517466	253.608	490.095	0.234606	0.408656	82.8966	0.462563	0.472813	0.450718	0.424088	0.447335	0.477086	0.403531	0.458985	42.6915	0.528632	0.544172	0.511034	0.458575	0.49258	0.544912	0.430806	0.526012	82.996	0.459637	0.467616	0.446051	0.328853	0.388929	0.421233	0.352283	0.45628	0.241011	4.26546	-9.68135	17
3385	dapA	b2478	878	0.804609	430.592	535.156	0.217212	0.362005	94.041	0.444948	0.433661	0.451951	0.412426	0.387535	0.380852	0.398516	0.446227	44.3039	0.528731	0.524593	0.531967	0.592589	0.44253	0.460786	0.530399	0.53118	56.9611	0.484734	0.456856	0.461	0.451651	0.389597	0.348746	0.425408	0.488591	0.23182	3.9637	-6.18135	15060
3389	upp	b2498	626	1.9011	1452.78	764.181	0.209837	0.37762	186.673	0.395693	0.37684	0.405821	0.323499	0.275244	0.305658	0.323343	0.407613	88.1977	0.524626	0.506923	0.533789	0.451218	0.463488	0.501644	0.476508	0.530281	68.1541	0.438892	0.411105	0.463152	0.360605	0.326413	0.371999	0.36233	0.450231	0.278087	5.11255	-8.68135	5823
3394	der	b2511	1472	1.05554	323.527	306.504	0.269782	0.357561	47.2553	0.427815	0.441204	0.413122	0.379494	0.41628	0.412401	0.385389	0.427587	27.3527	0.521919	0.529497	0.512739	0.469172	0.554825	0.536612	0.493252	0.520642	21.5939	0.450277	0.449896	0.444134	0.347836	0.412829	0.410561	0.361841	0.450969	0.260904	4.94591	-5.58135	118
3395	bamB	b2512	1178	0.631856	272.672	431.542	0.250971	0.40281	58.1009	0.449625	0.437896	0.457164	0.436506	0.403031	0.412633	0.412032	0.451878	36.5448	0.538838	0.548385	0.527692	0.530211	0.509402	0.508884	0.521602	0.539949	40.1828	0.444167	0.448196	0.439167	0.384667	0.341924	0.390244	0.35958	0.447186	0.233576	4.01146	-7.18135	11
3396	yfgM	b2513	620	0.725953	265.478	365.696	0.271696	0.363242	57.5845	0.450984	0.433808	0.465976	0.334126	0.362687	0.374141	0.352509	0.458511	36.2064	0.549834	0.527428	0.568024	0.483496	0.50909	0.513355	0.487591	0.552825	34.8714	0.483735	0.427296	0.508771	0.325559	0.353843	0.366404	0.359762	0.496261	0.244218	4.51019	-8.68135	18
3397	hisS	b2514	1274	0.885752	370.15	417.893	0.249603	0.390447	58.3992	0.42557	0.423185	0.427435	0.282204	0.373223	0.375287	0.345277	0.427809	35.3968	0.500084	0.484835	0.512025	0.356487	0.420582	0.427434	0.40118	0.503225	19.2104	0.483723	0.461694	0.473194	0.329582	0.373405	0.364957	0.373256	0.482476	0.253504	4.20365	-2.88135	111
3400	rlmN	b2517	1154	0.796814	275.146	345.308	0.261875	0.385936	69.3939	0.445995	0.450553	0.436321	0.325252	0.338222	0.366189	0.349465	0.453882	37.0782	0.535584	0.544955	0.524202	0.411815	0.418043	0.447295	0.429953	0.544026	19.0524	0.457311	0.466405	0.444814	0.310637	0.400342	0.391401	0.380008	0.461114	0.267311	3.87253	-6.78135	150
3401	ndk	b2518	431	2.33645	3186.94	1364.01	0.191365	0.332251	297.775	0.355766	0.313297	0.381704	0.33416	0.304878	0.322774	0.319242	0.364295	132.266	0.509922	0.512017	0.498482	0.480834	0.511899	0.533272	0.492676	0.507023	48.4154	0.467232	0.45082	0.440061	0.350919	0.416178	0.466958	0.375662	0.474813	0.262408	4.85187	-7.88135	149
3410	iscA	b2528	323	0.443313	540.299	1218.77	0.209795	0.314737	162.253	0.536602	0.567956	0.50078	0.472005	0.481734	0.525937	0.480565	0.544284	101.49	0.552911	0.564128	0.536418	0.461302	0.505284	0.527961	0.486038	0.564246	39.2109	0.518336	0.548795	0.486515	0.428252	0.475405	0.509563	0.455896	0.525182	0.251264	5.45848	-7.88135	17
3411	iscU	b2529	386	1.81058	1407.5	777.374	0.200654	0.340984	169.55	0.425663	0.410212	0.438326	0.381648	0.397271	0.388189	0.407228	0.429585	91.8515	0.50433	0.495376	0.510333	0.438008	0.425785	0.491578	0.463339	0.514762	28.9188	0.44902	0.43978	0.454514	0.359878	0.396875	0.416378	0.386767	0.448353	0.265743	4.80267	-7.78135	28
3412	iscS	b2530	1214	1.18526	1235.72	1042.58	0.191127	0.359975	156.638	0.418597	0.417073	0.417983	0.338536	0.389451	0.427117	0.377083	0.418302	89.7612	0.519446	0.501166	0.537745	0.3978	0.441654	0.467214	0.435136	0.520452	29.6979	0.419518	0.406403	0.422548	0.263584	0.321643	0.353171	0.308389	0.424118	0.283935	4.10612	-6.18135	112
3413	iscR	b2531	488	1.82455	677.591	371.374	0.232233	0.357295	94.0613	0.437936	0.413138	0.458989	0.336334	0.369632	0.372961	0.350878	0.446511	40.8671	0.519057	0.48473	0.547224	0.375824	0.411359	0.421525	0.384608	0.533318	38.8802	0.430844	0.396161	0.439231	0.29308	0.323024	0.310982	0.296375	0.439064	0.2431	4.45736	-7.88135	452
3414	trmJ	b2532	740	1.219	353.492	289.986	0.276813	0.406068	58.085	0.443671	0.458796	0.425991	0.356497	0.358462	0.428539	0.38853	0.440593	26.339	0.554928	0.560302	0.54825	0.550945	0.478159	0.495084	0.556754	0.554457	18.4473	0.448814	0.435765	0.456247	0.348047	0.333791	0.39292	0.378751	0.457589	0.239798	4.16098	-0.281351	3384
3423	glyA	b2551	1253	1.68021	2407.72	1432.98	0.190224	0.360646	185.464	0.380178	0.366863	0.392665	0.309414	0.313026	0.314189	0.324039	0.380858	96.7949	0.493296	0.494897	0.491207	0.419794	0.427772	0.403118	0.44559	0.494628	51.4975	0.432814	0.404639	0.43653	0.285338	0.293606	0.305574	0.310082	0.437554	0.270453	4.63326	-7.78135	1563
3424	glnB	b2553	338	1.5238	473.993	311.059	0.262858	0.361568	58.9351	0.414917	0.416727	0.410498	0.320203	0.307153	0.389875	0.345817	0.438064	19.8673	0.516971	0.519151	0.508903	0.466699	0.427166	0.500856	0.480122	0.536221	16.7735	0.424583	0.4329	0.41244	0.349804	0.326519	0.410764	0.367393	0.446586	0.271515	5.74666	-3.28135	61
3435	rnc	b2567	680	1.05958	348.363	328.774	0.260924	0.354338	67.862	0.421734	0.393313	0.444504	0.380092	0.324528	0.328945	0.336946	0.431458	32.9232	0.496495	0.454543	0.533563	0.453363	0.409695	0.406598	0.420618	0.504875	17.172	0.439056	0.398851	0.45906	0.30743	0.26068	0.278558	0.278323	0.455246	0.236596	4.19041	-3.38135	272
3436	lepB	b2568	974	0.243006	76.2438	313.752	0.26881	0.389867	51.8051	0.457863	0.461301	0.452993	0.390135	0.463328	0.498637	0.391581	0.456296	31.2243	0.526592	0.527167	0.525334	0.426859	0.499605	0.515942	0.413132	0.526963	15.781	0.443817	0.457902	0.42996	0.441341	0.534564	0.50499	0.447933	0.436326	0.237938	4.18832	-7.78135	16
3437	lepA	b2569	1799	1.14022	528.387	463.409	0.244554	0.373902	63.9033	0.419766	0.414001	0.424983	0.244183	0.340597	0.380095	0.301097	0.42239	38.3006	0.515572	0.519598	0.511314	0.389257	0.405764	0.491942	0.418137	0.518425	20.2514	0.422794	0.411586	0.432966	0.28142	0.265463	0.325217	0.309808	0.428068	0.27121	4.36316	-3.28135	198
3440	rseA	b2572	650	0.668668	151.185	226.099	0.280123	0.348277	44.1889	0.437086	0.438324	0.433261	0.351956	0.396513	0.405074	0.361945	0.433751	21.1095	0.522314	0.533494	0.510854	0.418463	0.443107	0.46132	0.431225	0.527465	108.322	0.434966	0.457146	0.390997	0.362865	0.380661	0.391689	0.369745	0.425303	0.23527	4.18717	-6.38135	33
3441	rpoE	b2573	575	0.306067	64.3789	210.342	0.312043	0.383026	36.9306	0.505573	0.514928	0.48169	0.443953	0.454846	0.479592	0.450598	0.511645	18.5128	0.578273	0.619279	0.536602	0.448618	0.507179	0.571016	0.502587	0.586447	110.386	0.496763	0.529196	0.460473	0.475398	0.516624	0.502446	0.491096	0.492865	0.204918	3.85235	-9.28135	2015
3444	yfiD	b2579	383	2.78847	1106.76	396.905	0.225051	0.336162	50.7318	0.347026	0.299396	0.381086	0.333109	0.299787	0.320382	0.333596	0.355465	21.8446	0.504883	0.478722	0.526918	0.478486	0.505082	0.534589	0.505522	0.506891	17.4463	0.390959	0.388079	0.382604	0.42764	0.432885	0.429763	0.429671	0.377427	0.276821	5.54022	-9.48135	1042
3445	yfiF	b2581	1037	1.2842	373.063	290.502	0.287215	0.405526	59.3362	0.46486	0.478394	0.448498	0.344576	0.347629	0.45419	0.391174	0.461959	29.1062	0.562821	0.563545	0.555202	0.489576	0.423003	0.525303	0.516241	0.5611	39.9048	0.451397	0.443336	0.458736	0.348539	0.305993	0.428325	0.367947	0.457371	0.259065	4.89344	-6.18135	5920
3446	kgtP	b2587	1298	0.735299	375.235	510.316	0.267366	0.33822	110.674	0.41054	0.388122	0.430313	0.263816	0.326491	0.349535	0.315619	0.411036	52.0276	0.512029	0.496286	0.525374	0.375243	0.412411	0.426592	0.419497	0.515846	78.0016	0.502879	0.452171	0.46591	0.278266	0.310303	0.350755	0.319696	0.498877	0.209216	1.75631	-7.78135	5854
3452	rplS	b2606	347	1.84086	14887.6	8087.28	0.227084	0.320461	1637.54	0.43418	0.394951	0.466076	0.250853	0.321838	0.348061	0.321112	0.462549	739.918	0.541068	0.527899	0.54999	0.374224	0.47968	0.491406	0.456795	0.558116	754.811	0.498178	0.460681	0.52686	0.331289	0.4002	0.38796	0.391278	0.518499	0.266061	3.28209	-3.58135	42
3453	trmD	b2607	767	0.0166636	139.544	8374.16	0.216225	0.396375	1449.11	0.614958	0.618572	0.608073	0.509826	0.534927	0.519897	0.518972	0.619792	747.341	0.597723	0.59789	0.595308	0.491702	0.542825	0.522926	0.51217	0.600947	608.369	0.551937	0.534857	0.564558	0.431094	0.45577	0.452654	0.451722	0.557534	0.2341	3.95038	-2.38135	31
3454	rimM	b2608	548	0.0539117	523.464	9709.67	0.205145	0.376569	1484.87	0.578974	0.59841	0.556822	0.597677	0.594205	0.600003	0.582552	0.571108	763.618	0.586903	0.606732	0.564005	0.623468	0.61616	0.61849	0.607099	0.575836	733.717	0.535413	0.580679	0.480015	0.570642	0.571172	0.600043	0.555237	0.523933	0.242526	4.87744	-6.98135	19
3455	rpsP	b2609	248	1.4544	13743.6	9449.68	0.1682	0.345645	1802.81	0.427539	0.402112	0.437303	0.316608	0.375007	0.382866	0.34716	0.439918	871.813	0.53585	0.490925	0.556823	0.341278	0.408822	0.441053	0.374453	0.560079	776.594	0.458595	0.410813	0.484236	0.323824	0.366109	0.37396	0.347559	0.478351	0.264913	3.58332	-6.18135	249
3456	ffh	b2610	1361	0.856053	335.795	392.26	0.251597	0.379897	60.6079	0.449031	0.449028	0.447962	0.3959	0.455728	0.468169	0.432086	0.448418	34.6599	0.532095	0.531958	0.531733	0.507586	0.487928	0.504852	0.501644	0.533164	20.3716	0.47241	0.450835	0.48467	0.35239	0.359903	0.411676	0.376834	0.476037	0.280242	4.6449	-4.58135	2320
3457	grpE	b2614	593	2.48124	2575.92	1038.16	0.220047	0.329207	217.525	0.396141	0.383652	0.409086	0.320808	0.271108	0.318734	0.290767	0.409695	95.5443	0.529376	0.496107	0.561776	0.412356	0.402393	0.460564	0.41043	0.545772	60.2979	0.444348	0.417911	0.46175	0.291349	0.262306	0.343692	0.295026	0.460265	0.272357	5.72703	-6.18135	3300
3459	yfjG	b2619	476	1.22614	230.73	188.176	0.345861	0.332353	41.5472	0.407664	0.39876	0.410836	0.7484	0.474146	0.39191	0.615454	0.399292	22.5078	0.525708	0.506166	0.53727	0.770677	0.641965	0.49073	0.732285	0.51117	17.8166	0.420335	0.414728	0.42409	0.714815	0.564791	0.457128	0.662354	0.40073	0.197451	3.08649	-4.28135	2880
3478	csrA	b2696	185	1.90783	1912.77	1002.59	0.199537	0.299622	217.624	0.331013	0.328689	0.326601	0.288706	0.344964	0.332346	0.342752	0.322439	101.526	0.441249	0.435374	0.443857	0.372877	0.493937	0.436867	0.428711	0.418425	100.058	0.335606	0.347782	0.325027	0.293633	0.39216	0.350572	0.355074	0.314448	0.223679	3.8205	-8.68135	235
3479	alaS	b2697	2630	0.931712	730.452	783.989	0.22372	0.385274	104.419	0.448633	0.428204	0.459313	0.30926	0.308167	0.394949	0.298765	0.451498	59.311	0.516359	0.501741	0.523341	0.371612	0.398805	0.488716	0.385437	0.518734	21.3318	0.583612	0.454659	0.593686	0.285537	0.318701	0.399617	0.308483	0.588452	0.258624	4.79301	-3.28135	128
3481	recA	b2699	1061	1.58155	721.37	456.117	0.21205	0.377747	93.7966	0.402481	0.424321	0.379833	0.365502	0.321718	0.334512	0.364534	0.402718	42.1957	0.532426	0.583374	0.477978	0.485871	0.519375	0.554658	0.514931	0.52856	50.9167	0.420894	0.455556	0.374836	0.399821	0.386536	0.389471	0.41496	0.415482	0.297131	4.6068	-7.78135	80
3499	rpoS	b2741	992	0.49328	199.043	403.509	0.270949	0.369244	53.4663	0.49533	0.480549	0.507776	0.302	0.313334	0.333638	0.322286	0.5056	29.0966	0.563739	0.547455	0.570519	0.443885	0.395974	0.385278	0.442109	0.573565	43.3749	0.481029	0.467347	0.491902	0.305094	0.30061	0.284324	0.306509	0.490744	0.247314	5.1952	-7.78135	63
3506	ftsB	b2748	311	0.160464	50.7704	316.397	0.284647	0.356752	41.7115	0.493284	0.481114	0.491465	0.503183	0.54521	0.517745	0.537913	0.476627	21.4858	0.575141	0.572751	0.566505	0.592053	0.598004	0.574446	0.611788	0.5448	40.0851	0.498485	0.48617	0.442345	0.476641	0.506553	0.504443	0.517442	0.444873	0.195947	3.86509	-10.1814	194
3528	eno	b2779	1298	1.89671	4054.85	2137.83	0.183928	0.341317	538.349	0.367143	0.347902	0.384737	0.327908	0.3411	0.319563	0.349519	0.368336	232.083	0.490092	0.492308	0.486735	0.462919	0.475597	0.467164	0.488789	0.490305	30.0244	0.410118	0.3809	0.436298	0.26641	0.294426	0.353136	0.296684	0.414642	0.295862	4.42179	-7.48135	88
3529	pyrG	b2780	1637	1.30732	1021.52	781.386	0.201419	0.366316	164.399	0.41948	0.412345	0.419936	0.353895	0.347614	0.34227	0.341931	0.420886	86.9521	0.509393	0.510769	0.503206	0.406873	0.412755	0.496678	0.407048	0.512357	15.648	0.499979	0.547625	0.438392	0.348692	0.381722	0.442343	0.356028	0.464778	0.255511	4.23107	-4.98135	228
3562	rppH	b2830	530	0.393929	88.098	223.639	0.331281	0.324698	37.9247	0.440422	0.488049	0.388892	0.529146	0.558436	0.551391	0.555699	0.426039	19.3413	0.520462	0.575057	0.462826	0.609783	0.609053	0.612775	0.651032	0.507881	27.8004	0.448819	0.488439	0.407938	0.512	0.591943	0.580005	0.577624	0.430254	0.205205	3.06719	-7.88135	353
3588	prfB	b2891	1022	1.07736	882.427	819.067	0.213023	0.368395	123.505	0.341237	0.341237	0.444564	0.319454	0.341237	0.341237	0.319454	0.439574	79.3374	0.397023	0.397023	0.491238	0.391675	0.397023	0.397023	0.391675	0.538519	16.0755	0.288511	0.288511	0.439301	0.275965	0.288511	0.288511	0.275965	0.470594	0.277938	5.5623	-0.881351	167
3593	ygfY	b2897	266	1.5785	254.181	161.027	0.335791	0.286278	42.4419	0.350867	0.349878	0.349307	0.345184	0.383797	0.357621	0.378986	0.337285	17.2574	0.488048	0.447667	0.518068	0.496	0.44642	0.46563	0.508747	0.498334	27.8565	0.344638	0.288495	0.388443	0.304175	0.302813	0.276586	0.303221	0.353555	0.248574	4.25554	-4.78135	1419
3605	rpiA	b2914	659	1.31102	588.219	448.673	0.235649	0.345751	97.3576	0.384742	0.366723	0.403105	0.371388	0.278559	0.343623	0.367575	0.39056	46.0381	0.503677	0.441428	0.559204	0.501755	0.373093	0.411974	0.489017	0.516093	15.4603	0.415428	0.369861	0.459386	0.39626	0.298025	0.346158	0.383252	0.426473	0.257929	4.26189	-3.28135	53
3610	mscS	b2924	860	0.611208	224.434	367.197	0.258462	0.358884	64.3728	0.416507	0.412538	0.417517	0.268276	0.332753	0.399066	0.319715	0.421407	28.5259	0.505748	0.480059	0.522759	0.304386	0.384106	0.451669	0.3504	0.514276	31.8424	0.400518	0.382457	0.41114	0.268801	0.313959	0.34739	0.307416	0.405929	0.244216	3.18913	-6.08135	358
3622	speA	b2938	1976	0.976821	749.257	767.036	0.221335	0.400369	99.7198	0.439994	0.455722	0.423981	0.502475	0.551577	0.483332	0.500106	0.436294	67.3585	0.507811	0.508473	0.506973	0.526459	0.565186	0.523045	0.523441	0.505881	21.1541	0.421972	0.418266	0.424398	0.45535	0.47545	0.437632	0.458449	0.419361	0.260062	4.17148	-7.88135	9
3629	yggL	b2959	326	1.20032	611.09	509.107	0.238705	0.31684	98.4251	0.405964	0.361158	0.443583	0.307788	0.357104	0.324669	0.340605	0.413311	52.4209	0.484738	0.467829	0.49892	0.383476	0.464853	0.462983	0.430198	0.488554	44.0808	0.428026	0.418435	0.43683	0.32376	0.394389	0.415068	0.372088	0.431652	0.257695	5.33446	-6.58135	0
3630	trmI	b2960	719	1.02227	296.566	290.105	0.269379	0.388456	58.9833	0.442609	0.435932	0.441311	0.369261	0.420786	0.4352	0.408009	0.44327	32.5275	0.543917	0.529521	0.547232	0.486387	0.517797	0.542335	0.528315	0.543309	28.5942	0.445212	0.45369	0.43426	0.425424	0.448652	0.480335	0.445147	0.444621	0.235833	4.93389	-2.28135	4168
3661	yqhA	b3002	494	0.936447	120.142	128.295	0.277443	0.319453	35.996	0.419506	0.400525	0.428866	0.395675	0.404214	0.386948	0.428341	0.420876	16.5828	0.53698	0.531838	0.53818	0.644438	0.558296	0.552816	0.652935	0.531518	38.2258	0.414567	0.387701	0.411836	0.493513	0.344124	0.329508	0.476403	0.419103	0.239991	2.28441	-3.28135	1347
3681	ribB	b3041	653	1.39108	331.381	238.218	0.304582	0.354686	36.7691	0.3991	0.408429	0.371445	0.33631	0.380169	0.425445	0.401973	0.399851	19.4407	0.537871	0.524545	0.536627	0.529395	0.560012	0.573937	0.564894	0.53401	32.0689	0.40662	0.406988	0.398738	0.370042	0.372984	0.410415	0.382546	0.408348	0.249897	4.73875	-8.98135	7273
3722	deaD	b3162	1889	0.988015	777.626	787.059	0.223359	0.40189	118.633	0.441597	0.423858	0.459557	0.375657	0.456306	0.42526	0.411535	0.440653	68.5344	0.535337	0.519604	0.551262	0.473172	0.554681	0.524805	0.508706	0.534964	79.3167	0.453989	0.439871	0.464338	0.344865	0.451842	0.424247	0.393581	0.45303	0.285492	4.82236	-5.58135	180
3723	nlpI	b3163	884	0.0661645	54.6583	826.098	0.272634	0.376776	117.52	0.526738	0.532474	0.516006	0.529739	0.491793	0.489085	0.532668	0.522551	71.7158	0.545363	0.547531	0.536153	0.47204	0.415616	0.45094	0.469944	0.546937	164.094	0.558045	0.612612	0.492529	0.456633	0.447635	0.4395	0.483498	0.546971	0.205225	3.89836	-6.18135	109
3724	pnp	b3164	2135	1.21383	1303.08	1073.53	0.207779	0.375171	156.646	0.428738	0.423995	0.432856	0.28854	0.390919	0.388047	0.331169	0.429659	96.1904	0.509081	0.493505	0.524008	0.338608	0.450246	0.455189	0.39208	0.510874	70.4093	0.445126	0.412771	0.442158	0.198082	0.277778	0.330833	0.234996	0.447888	0.280264	4.82907	-6.08135	247
3725	rpsO	b3165	269	1.51373	12388.4	8183.97	0.171218	0.312342	1795.02	0.374039	0.355989	0.381682	0.25968	0.282527	0.350486	0.285002	0.385965	718.304	0.487741	0.494248	0.478151	0.445842	0.484531	0.511382	0.464533	0.483653	833.129	0.376446	0.35432	0.390049	0.258561	0.276798	0.347497	0.275068	0.395259	0.292155	3.34371	-6.18135	149
3726	truB	b3166	944	0.368145	132.158	358.984	0.223085	0.383019	57.4011	0.498446	0.490714	0.503402	0.525076	0.603081	0.585424	0.55265	0.49146	34.4055	0.524738	0.52991	0.516982	0.58585	0.618802	0.621387	0.604311	0.518498	28.7311	0.442871	0.44146	0.443475	0.502178	0.520241	0.536506	0.538278	0.433597	0.247948	4.35841	-11.9814	0
3727	rbfA	b3167	401	1.55187	795.956	512.9	0.231827	0.347357	75.1542	0.437409	0.412332	0.459625	0.380779	0.373893	0.385855	0.363065	0.448096	42.8387	0.515678	0.494946	0.532812	0.536252	0.474357	0.476523	0.463576	0.521684	54.9731	0.428329	0.383593	0.471455	0.336921	0.309128	0.350763	0.308047	0.445591	0.300004	5.55769	-7.78135	164
3728	infB	b3168	2672	1.0225	1500.22	1467.2	0.194185	0.3721	176.729	0.449149	0.44852	0.448474	0.312681	0.456646	0.477106	0.391962	0.448741	114.335	0.52629	0.52409	0.52597	0.4833	0.54975	0.578192	0.526918	0.525607	110.009	0.438615	0.439586	0.436957	0.376716	0.450607	0.468825	0.424887	0.436919	0.282424	5.50603	-7.28135	25
3729	nusA	b3169	1487	0.970222	1050.05	1082.28	0.207037	0.366369	152.003	0.448729	0.427302	0.470316	0.363796	0.376139	0.39966	0.389173	0.45168	89.5796	0.52836	0.502369	0.553836	0.477066	0.470085	0.494343	0.48254	0.530623	147.544	0.470656	0.444271	0.4976	0.325152	0.324553	0.393497	0.329963	0.475884	0.277952	5.74601	-5.88135	28
3732	secG	b3175	332	0.379696	1081.07	2847.2	0.217941	0.32259	351.189	0.44401	0.437909	0.44468	0.339682	0.356975	0.41455	0.367961	0.454986	328.261	0.539045	0.514011	0.55533	0.478847	0.473805	0.486444	0.496663	0.548715	442.98	0.453089	0.432683	0.454145	0.370156	0.406529	0.442521	0.392506	0.455442	0.243252	3.43026	-7.88135	228
3733	glmM	b3176	1337	1.16737	479.072	410.384	0.230127	0.388422	59.0964	0.41234	0.413848	0.407799	0.281319	0.351977	0.380114	0.326773	0.413912	32.9052	0.511954	0.51503	0.508554	0.360814	0.459428	0.464478	0.420156	0.51278	18.0894	0.417162	0.423385	0.410311	0.34329	0.411346	0.437037	0.376902	0.416359	0.253962	4.53359	-6.08135	-7
3737	greA	b3181	476	1.21033	502.233	414.955	0.250664	0.329286	106.036	0.35062	0.35031	0.350025	0.267119	0.312895	0.349879	0.281354	0.354684	43.0671	0.493898	0.518981	0.464132	0.379643	0.415825	0.497277	0.374388	0.503727	54.0179	0.376182	0.390479	0.357013	0.23718	0.240752	0.33705	0.243998	0.393763	0.282529	5.63453	-7.88135	1867
3738	obgE	b3183	1172	0.906242	400.348	441.768	0.256041	0.377073	58.8295	0.446228	0.467108	0.42501	0.339163	0.370247	0.444103	0.363097	0.446744	40.2721	0.536898	0.55327	0.51885	0.366619	0.332918	0.469411	0.375892	0.542866	52.2476	0.44468	0.466151	0.414013	0.355869	0.380547	0.46082	0.369038	0.442796	0.262491	5.7148	-6.18135	16
3739	yhbE	b3184	965	0.0521401	18.7922	360.417	0.287532	0.412259	49.4886	0.572491	0.56253	0.544094	0.475869	0.464683	0.484467	0.505272	0.576988	29.4306	0.591925	0.564871	0.599622	0.528755	0.55121	0.566601	0.572236	0.593661	59.1432	0.507305	0.500036	0.496998	0.494017	0.499616	0.506573	0.521981	0.505127	0.208803	2.19461	-7.18135	127
3740	rpmA	b3185	257	1.38595	14347.3	10351.9	0.216075	0.327665	2199.56	0.408637	0.404125	0.410348	0.308709	0.356894	0.377429	0.344072	0.424666	844.066	0.486899	0.483931	0.48353	0.434783	0.447613	0.458827	0.447046	0.498217	846.474	0.411273	0.392727	0.421643	0.324924	0.348083	0.349974	0.359556	0.429488	0.285306	4.62485	-10.0814	21
3741	rplU	b3186	311	1.26048	15964.7	12665.5	0.19325	0.340611	2542.2	0.411379	0.380098	0.442314	0.393985	0.373194	0.360993	0.392893	0.421931	1217.59	0.493418	0.421557	0.550978	0.442846	0.414748	0.426448	0.429426	0.50895	1026.79	0.42363	0.368913	0.474094	0.331328	0.320521	0.329342	0.3301	0.435854	0.244774	4.46039	-9.18135	1784
3760	sspB	b3228	497	0.252609	243.662	964.583	0.20917	0.390563	132.992	0.504825	0.53343	0.475538	0.416324	0.395139	0.487355	0.432588	0.514955	68.3996	0.528563	0.542213	0.508232	0.454232	0.386721	0.493498	0.457453	0.544924	53.4103	0.454634	0.460079	0.441613	0.334781	0.312868	0.435848	0.3495	0.46999	0.221003	4.81843	-6.18135	6
3761	sspA	b3229	638	0.955615	880.022	920.896	0.194457	0.371113	167.404	0.428162	0.416689	0.438031	0.390193	0.464255	0.453667	0.418825	0.424105	81.9951	0.497128	0.465756	0.5276	0.408895	0.500046	0.465897	0.442509	0.496233	70.0722	0.416041	0.414314	0.415826	0.328334	0.448968	0.445774	0.398689	0.403904	0.259244	4.1276	-11.1814	395
3762	rpsI	b3230	392	1.22408	19319.9	15783.3	0.171155	0.333444	2675.33	0.437966	0.450596	0.420882	0.314594	0.399911	0.409425	0.371946	0.442858	1236.75	0.472327	0.498942	0.438918	0.402393	0.409769	0.446226	0.414747	0.476051	1335.84	0.431934	0.459616	0.390041	0.315272	0.334199	0.396855	0.334997	0.441016	0.315378	3.20239	-3.58135	16
3763	rplM	b3231	428	1.28297	16227.6	12648.5	0.188075	0.323855	2872.7	0.430454	0.436434	0.422414	0.330824	0.365559	0.419488	0.349122	0.438556	1246.44	0.535732	0.538526	0.527758	0.435377	0.467323	0.503863	0.446957	0.545091	1108.66	0.460316	0.448668	0.469539	0.391668	0.399313	0.418478	0.390719	0.466158	0.266938	4.46843	-3.28135	219
3765	mdh	b3236	938	1.33201	702.469	527.374	0.220928	0.367058	97.6262	0.413178	0.412188	0.411563	0.361345	0.434332	0.383109	0.372951	0.410805	47.6744	0.518568	0.54144	0.49242	0.462138	0.59021	0.546483	0.515318	0.513492	43.8867	0.405374	0.42652	0.374706	0.43489	0.451709	0.357266	0.415097	0.401258	0.258391	4.53439	-9.98135	1589
3776	mreB	b3251	1043	1.42283	885.615	622.434	0.224849	0.382272	123.622	0.412674	0.423001	0.401416	0.369266	0.401558	0.368939	0.378662	0.412508	63.8895	0.516072	0.522455	0.50879	0.450155	0.432491	0.452687	0.439495	0.519236	39.426	0.44023	0.443618	0.418687	0.305052	0.381975	0.351006	0.358788	0.442582	0.270147	4.36913	-5.18135	305
3783	smg	b3284	473	0.121959	25.4388	208.585	0.304531	0.310444	33.0105	0.434306	0.424421	0.437565	0.487782	0.426563	0.402798	0.478434	0.433489	15.4009	0.531722	0.518101	0.542358	0.577354	0.524837	0.504712	0.573451	0.531941	27.1194	0.418472	0.384853	0.452181	0.434996	0.417541	0.378109	0.439473	0.417561	0.207216	4.651	-13.3814	-28
3788	rplQ	b3294	383	0.858176	15536.4	18104	0.166723	0.383264	2694.96	0.492382	0.438903	0.54386	0.300317	0.404675	0.405527	0.377672	0.508949	1297.76	0.528604	0.487727	0.564173	0.359144	0.437177	0.439182	0.405255	0.547431	1298.11	0.499012	0.382442	0.586042	0.276375	0.362102	0.348031	0.334075	0.522421	0.259076	3.49647	-7.88135	41
3789	rpoA	b3295	989	0.200964	3797	18894	0.202937	0.374297	2688.9	0.527825	0.529287	0.525682	0.408273	0.479458	0.492856	0.407566	0.529877	1540.61	0.55372	0.558229	0.54917	0.465783	0.483292	0.555368	0.436513	0.556711	1317.47	0.488117	0.491878	0.483694	0.376986	0.459342	0.469514	0.392261	0.488465	0.237349	4.50192	-8.18135	26
3790	rpsD	b3296	620	0.648855	12156.3	18735.1	0.200891	0.3585	3006.34	0.466784	0.450733	0.482149	0.330755	0.466854	0.473177	0.412812	0.464067	1689.19	0.516388	0.494336	0.53739	0.456358	0.51171	0.517285	0.490504	0.514942	1342.46	0.463225	0.425599	0.497624	0.431578	0.380355	0.421951	0.418502	0.467069	0.267636	3.96006	-6.18135	34
3791	rpsK	b3297	389	0.459831	8020.37	17442	0.207296	0.336221	2665.05	0.484788	0.457598	0.507413	0.360983	0.425974	0.432115	0.397691	0.488639	1534.71	0.577156	0.562448	0.587633	0.474251	0.515409	0.541329	0.496017	0.58688	1411.91	0.5115	0.519375	0.501657	0.444853	0.517883	0.513607	0.482807	0.506355	0.249641	2.71093	-6.98135	17
3792	rpsM	b3298	356	0.661712	11578.8	17498.2	0.1909	0.359522	2818.98	0.527281	0.486925	0.566204	0.397619	0.456559	0.48822	0.431986	0.540984	1639.06	0.596155	0.572355	0.616069	0.445664	0.541498	0.581751	0.490435	0.604771	1394.87	0.494338	0.457973	0.527649	0.28646	0.408497	0.465169	0.382227	0.511887	0.257794	3.80409	-7.78135	147
3794	secY	b3300	1331	0.0379929	506.527	13332.2	0.235293	0.385823	1597.24	0.563942	0.597925	0.521323	0.438506	0.522582	0.563916	0.47879	0.563563	1069.52	0.571457	0.604444	0.524011	0.478875	0.530032	0.592368	0.490358	0.570347	1245.72	0.505592	0.55845	0.426187	0.402832	0.530979	0.569383	0.476508	0.502071	0.2271	2.58051	-5.18135	8
3795	rplO	b3301	434	0.598311	9738.24	16276.2	0.166836	0.362903	2103.69	0.508753	0.545253	0.469995	0.451837	0.494998	0.55358	0.465869	0.510881	1415.13	0.528209	0.592831	0.466002	0.512384	0.54279	0.604101	0.525882	0.516573	1436.45	0.459555	0.504657	0.415483	0.422081	0.443091	0.498653	0.426276	0.458596	0.293449	3.69636	-10.0814	4
3796	rpmD	b3302	179	0.785346	12982.9	16531.5	0.206263	0.323743	2251.22	0.484035	0.459797	0.499179	0.338735	0.450702	0.454536	0.435614	0.497971	1341.52	0.535684	0.521004	0.545012	0.400502	0.481139	0.518744	0.469278	0.568165	1300.24	0.455454	0.452876	0.450236	0.379966	0.418649	0.452613	0.426803	0.478316	0.247754	3.66753	-6.68135	4
3797	rpsE	b3303	503	0.655981	9323.73	14213.4	0.206856	0.352107	1972.98	0.465097	0.468202	0.460269	0.407571	0.451708	0.444666	0.462085	0.465623	1310.19	0.527422	0.543459	0.506534	0.429346	0.489535	0.544129	0.473837	0.531949	1314.35	0.475659	0.483608	0.464854	0.346987	0.397718	0.447356	0.383402	0.484377	0.276406	4.23637	-7.88135	15
3798	rplR	b3304	353	0.823301	10703.5	13000.8	0.183595	0.353088	1959.02	0.480836	0.495922	0.455062	0.407362	0.409672	0.439103	0.412499	0.485162	1364.79	0.500215	0.51195	0.475254	0.49357	0.460151	0.478483	0.499983	0.499678	1303.06	0.453191	0.490222	0.411227	0.377715	0.388868	0.430691	0.384217	0.463388	0.270728	4.39134	-4.98135	10
3799	rplF	b3305	533	0.768961	13355.9	17368.8	0.195065	0.365403	1872.53	0.483983	0.474569	0.491654	0.507695	0.579832	0.492899	0.518277	0.469801	1325.12	0.537315	0.495048	0.576109	0.583556	0.620436	0.53493	0.569892	0.524654	1266.65	0.482072	0.450507	0.510255	0.486456	0.535708	0.460874	0.482517	0.472344	0.248552	4.07856	-9.48135	13
3800	rpsH	b3306	392	0.74071	9383.05	12667.6	0.223428	0.347908	1943.79	0.486274	0.466532	0.504901	0.401837	0.475576	0.468497	0.433675	0.484718	1241.15	0.51555	0.479448	0.553888	0.421967	0.509931	0.523781	0.461903	0.510404	1206.21	0.44168	0.445054	0.433963	0.440146	0.485283	0.461248	0.454905	0.42856	0.272026	4.67606	-6.18135	34
3801	rpsN	b3307	305	0.723981	10324.9	14261.3	0.189397	0.361443	2106.14	0.487959	0.441401	0.530168	0.35356	0.387288	0.366689	0.356953	0.512737	1234.1	0.541678	0.49054	0.591396	0.449557	0.41461	0.422473	0.433847	0.567746	1446.36	0.475684	0.43939	0.510585	0.312001	0.348852	0.352333	0.338501	0.492181	0.2641	3.81851	-9.48135	15
3802	rplE	b3308	539	0.470216	7678.56	16329.8	0.202571	0.336512	2540.3	0.449196	0.40072	0.496378	0.312621	0.299889	0.387348	0.336637	0.46617	1508.57	0.544433	0.502179	0.59191	0.366962	0.35028	0.441879	0.379034	0.565004	1763.48	0.450169	0.413783	0.488908	0.273998	0.292842	0.366198	0.295189	0.468303	0.292003	3.5094	-6.18135	15
3803	rplX	b3309	314	0.516317	8456.15	16377.8	0.174829	0.324459	3379.88	0.497832	0.485373	0.501771	0.485967	0.443812	0.466239	0.445429	0.495572	1694.02	0.553542	0.548572	0.553176	0.565759	0.512591	0.533635	0.51922	0.555487	1841.19	0.492695	0.490206	0.488686	0.464583	0.41225	0.479066	0.418668	0.503861	0.281052	4.58913	-9.98135	11
3804	rplN	b3310	371	0.454672	7948.86	17482.6	0.20994	0.369245	3055.58	0.515304	0.533998	0.48802	0.429301	0.520355	0.550128	0.45861	0.511126	1694.69	0.582223	0.600534	0.557829	0.490014	0.546759	0.582063	0.506674	0.589415	1766.24	0.486712	0.496245	0.469012	0.355338	0.432311	0.495582	0.379407	0.495929	0.272275	3.33405	-6.18135	165
3805	rpsQ	b3311	254	0.839225	14251.7	16982	0.193232	0.34185	2369.65	0.470384	0.453022	0.479877	0.393823	0.479124	0.484527	0.464305	0.466665	1159.04	0.508208	0.513408	0.499756	0.408574	0.512507	0.532215	0.490255	0.501737	1391.17	0.428604	0.401645	0.456086	0.251829	0.371328	0.41372	0.348696	0.443399	0.275863	4.36702	-8.98135	0
3806	rpmC	b3312	191	0.485999	8793.6	18093.9	0.176368	0.338796	2537.33	0.45216	0.469359	0.423176	0.335588	0.40404	0.455722	0.385572	0.455685	1241.12	0.486253	0.499272	0.453713	0.381179	0.431393	0.483114	0.427317	0.486531	1164.22	0.381696	0.392917	0.36625	0.267979	0.333815	0.396343	0.304064	0.402418	0.284728	4.18238	-6.08135	0
3807	rplP	b3313	410	0.761876	11511	15108.7	0.173457	0.355024	2058.18	0.432086	0.425351	0.429287	0.33581	0.337704	0.391988	0.363825	0.451415	1269.57	0.525288	0.529215	0.513909	0.43707	0.452209	0.524366	0.471116	0.539712	1092.69	0.433797	0.42438	0.438556	0.282911	0.351753	0.40262	0.345163	0.450015	0.298331	3.70623	-11.1814	13
3808	rpsC	b3314	701	0.712948	11275.7	15815.5	0.18749	0.370913	2055.67	0.481224	0.456326	0.495923	0.288458	0.350474	0.424913	0.31266	0.491391	1306.49	0.541137	0.517257	0.561216	0.395211	0.393191	0.467711	0.387262	0.552586	1310.87	0.501689	0.475074	0.511596	0.346565	0.34698	0.428887	0.35417	0.509349	0.291639	4.00166	-6.18135	18
3809	rplV	b3315	332	0.61686	10412	16879.1	0.17672	0.31503	2106.43	0.46801	0.449402	0.480888	0.400476	0.404602	0.449439	0.391764	0.477519	1321.59	0.56545	0.546186	0.578431	0.437079	0.429411	0.5395	0.427138	0.588373	1369.62	0.470205	0.427645	0.503758	0.410338	0.385329	0.423017	0.408116	0.480803	0.253266	4.56754	-11.0814	15
3810	rpsS	b3316	278	0.778274	12241.8	15729.4	0.190213	0.311439	2000.76	0.441427	0.467131	0.414858	0.420859	0.416693	0.445414	0.4028	0.443715	1465.04	0.512538	0.520345	0.502639	0.491856	0.469101	0.50242	0.456169	0.516605	1209.7	0.40412	0.42915	0.376628	0.396609	0.404856	0.429906	0.396723	0.400837	0.245169	4.20113	-6.18135	17
3811	rplB	b3317	821	0.853875	11836.7	13862.3	0.18675	0.378063	1730.1	0.478881	0.445706	0.51241	0.324727	0.404405	0.392734	0.377336	0.484178	1239.63	0.558638	0.523064	0.592451	0.466989	0.522576	0.517032	0.490723	0.560462	1202.01	0.489322	0.454932	0.525859	0.299573	0.385294	0.366863	0.341971	0.493997	0.273128	3.86852	-9.48135	18
3812	rplW	b3318	302	0.584874	8915.95	15244.2	0.188459	0.308477	2120.82	0.443553	0.450656	0.434322	0.449113	0.507761	0.469447	0.461303	0.427872	1346.68	0.500496	0.504954	0.494909	0.477928	0.509716	0.502626	0.494216	0.497292	1133.01	0.443826	0.435087	0.451563	0.404112	0.442938	0.45111	0.426186	0.442331	0.309247	4.72076	-10.0814	-3
3813	rplD	b3319	605	0.655671	10921.1	16656.3	0.159984	0.34795	2068.25	0.46436	0.465818	0.462014	0.405079	0.497127	0.481634	0.457738	0.460586	1398.33	0.548189	0.550971	0.543697	0.476183	0.598199	0.612468	0.561754	0.542816	1396.7	0.462113	0.480077	0.44337	0.409048	0.490227	0.500984	0.47544	0.458543	0.268608	4.5483	-9.98135	11
3814	rplC	b3320	629	0.73237	11630	15880	0.201108	0.356884	2325.12	0.475144	0.472086	0.476459	0.501144	0.476045	0.471039	0.522062	0.466602	1398.95	0.528911	0.552339	0.505583	0.599634	0.580923	0.558742	0.637694	0.515775	1296.41	0.462066	0.457064	0.461251	0.471184	0.498465	0.432199	0.492489	0.45255	0.273006	4.73677	-7.98135	33
3815	rpsJ	b3321	311	0.751105	13810.4	18386.8	0.164714	0.34045	2234.55	0.441312	0.388334	0.491591	0.383424	0.424394	0.412444	0.412931	0.444034	1314.38	0.513037	0.45507	0.566671	0.436844	0.479069	0.455751	0.477994	0.520524	1428.41	0.411466	0.350549	0.471284	0.3185	0.347504	0.373706	0.34939	0.426842	0.26196	4.4166	-6.18135	238
3821	tufA	b3339	1184	1.38703	13937	10048.1	0.276048	0.357492	1600.3	0.444431	0.448663	0.426699	0.290276	0.318469	0.356529	0.322129	0.437993	818.562	0.537373	0.549308	0.505713	0.34468	0.407878	0.481594	0.399403	0.53738	59.497	0.952659	0.931832	0.969083	0.55916	0.59863	0.737569	0.565305	0.966766	0.290049	4.83914	-7.38135	71
3822	fusA	b3340	2114	0.472573	6340.75	13417.5	0.17786	0.36982	1880.24	0.479401	0.467141	0.491603	0.389209	0.472993	0.445052	0.422201	0.479456	1235.25	0.528689	0.529023	0.52818	0.415779	0.490977	0.475705	0.428748	0.528922	721.354	0.458516	0.450395	0.465951	0.34806	0.447848	0.400588	0.385405	0.457205	0.280383	4.86009	-6.18135	28
3823	rpsG	b3341	539	1.37267	12148.1	8849.98	0.17983	0.347217	1756.08	0.438854	0.434731	0.434918	0.388017	0.407732	0.397057	0.39792	0.441152	1002.99	0.563595	0.552546	0.569353	0.459105	0.471559	0.495398	0.456178	0.571202	755.953	0.491703	0.483204	0.497187	0.356493	0.347475	0.363227	0.363389	0.501438	0.257374	3.74332	-6.18135	97
3824	rpsL	b3342	374	1.05875	12181.8	11505.8	0.185892	0.363449	2106.76	0.494255	0.494241	0.481531	0.335944	0.424256	0.482003	0.369758	0.507133	1082.89	0.54094	0.519718	0.560888	0.409273	0.472066	0.510699	0.437648	0.554592	817.371	0.496157	0.47759	0.511878	0.357867	0.427727	0.475341	0.389574	0.508787	0.268029	2.90798	-7.78135	126
3829	fkpA	b3347	812	1.60282	882.228	550.424	0.211946	0.325394	152.443	0.399462	0.392807	0.405175	0.397772	0.397829	0.374191	0.418361	0.398554	57.977	0.497512	0.491884	0.501267	0.414601	0.437835	0.428828	0.444036	0.501278	34.894	0.446003	0.433504	0.451124	0.386098	0.338017	0.361183	0.357835	0.453042	0.267122	5.21896	-6.18135	488
3830	slyD	b3349	590	1.05166	2080.16	1977.98	0.204062	0.387305	378.849	0.430441	0.401911	0.453147	0.479601	0.43881	0.426562	0.45762	0.428668	169.898	0.527462	0.515206	0.536074	0.596524	0.490099	0.506863	0.559109	0.529454	125.276	0.440994	0.417404	0.457545	0.474828	0.391045	0.385706	0.439657	0.4446	0.249648	6.52048	-7.78135	95
3853	aroB	b3389	1088	0.142633	87.9767	616.804	0.271508	0.401388	78.0523	0.528422	0.530892	0.515774	0.531103	0.52205	0.506784	0.509479	0.519274	48.4174	0.558509	0.553322	0.553589	0.494762	0.487154	0.49907	0.479821	0.556284	17.7866	0.510484	0.474601	0.517755	0.406698	0.386673	0.37137	0.415755	0.51256	0.219141	3.93367	-9.08135	57
3854	aroK	b3390	521	1.00479	1157.12	1151.6	0.232085	0.330518	214.111	0.431103	0.437545	0.408055	0.322645	0.383613	0.389065	0.346277	0.433266	103.215	0.564854	0.570013	0.543641	0.520073	0.529092	0.558704	0.518241	0.563459	38.6606	0.459197	0.455258	0.444102	0.383321	0.392741	0.405478	0.382758	0.462628	0.240446	5.13916	0.0186486	401
3896	rpoH	b3461	854	0.67027	353.212	526.97	0.25232	0.391956	89.9392	0.452352	0.441798	0.452948	0.298539	0.39119	0.435787	0.366798	0.455272	33.983	0.560925	0.556449	0.55887	0.410535	0.538835	0.558801	0.502025	0.563069	118.708	0.468077	0.463099	0.470752	0.340695	0.416382	0.432095	0.402191	0.470171	0.285968	4.34093	-6.28135	245
3944	yiaF	b3554	710	1.0002	431.821	431.733	0.22644	0.345507	99.8129	0.37462	0.424074	0.329716	0.432428	0.456933	0.468996	0.427463	0.366995	43.5742	0.457187	0.494019	0.424092	0.482912	0.549964	0.533027	0.468605	0.447867	26.1542	0.392058	0.412222	0.372043	0.364298	0.400762	0.409407	0.353915	0.391245	0.224443	3.853	-8.68135	1401
3971	secB	b3609	467	2.11243	1983.52	938.975	0.185512	0.328758	216.502	0.354387	0.32111	0.385644	0.231884	0.252513	0.284518	0.248745	0.369645	81.4749	0.484082	0.468178	0.498388	0.385853	0.424351	0.418623	0.403837	0.493021	71.8653	0.396284	0.389098	0.398812	0.173774	0.226226	0.241122	0.2143	0.412107	0.255164	4.76706	-5.48135	63
3972	grxC	b3610	251	0.889901	596.027	669.767	0.212969	0.313865	160.028	0.456813	0.417175	0.477383	0.329705	0.396615	0.401763	0.366525	0.473063	65.545	0.512586	0.522962	0.487183	0.438639	0.526707	0.529045	0.478665	0.506516	58.9459	0.443312	0.404274	0.429036	0.294608	0.392576	0.391558	0.345183	0.441848	0.259652	4.64062	-7.78135	142
3973	yibN	b3611	431	0.872079	612.932	702.84	0.229515	0.366009	171.891	0.423887	0.42843	0.410855	0.384468	0.310698	0.36906	0.378563	0.438158	67.4453	0.500175	0.487086	0.505016	0.443528	0.417118	0.455439	0.465011	0.509665	72.0498	0.432712	0.453799	0.409987	0.390299	0.412526	0.509338	0.441939	0.435205	0.251511	3.459	-6.18135	4032
3975	tdh	b3616	1025	0.88225	267.363	303.047	0.263203	0.366302	43.6725	0.444926	0.425781	0.463844	0.364611	0.411328	0.459257	0.442552	0.446632	26.7791	0.53063	0.533185	0.527451	0.430646	0.463212	0.530725	0.476014	0.534387	25.5904	0.423568	0.428382	0.415639	0.445778	0.46762	0.47117	0.489173	0.415663	0.249875	4.05007	-8.58135	10
3976	kbl	b3617	1196	0.87093	247.408	284.074	0.278686	0.375711	34.4612	0.455964	0.419397	0.492844	0.372791	0.327628	0.323913	0.380782	0.46251	24.1457	0.51167	0.511817	0.509352	0.53547	0.453379	0.429545	0.52422	0.514499	18.2099	0.439738	0.426178	0.452283	0.368543	0.321812	0.335787	0.363382	0.446005	0.248019	4.62902	-6.18135	275
3989	rpmG	b3636	167	0.891259	7654.82	8588.78	0.210952	0.24515	2886.94	0.388773	0.357481	0.408022	0.321647	0.368864	0.372998	0.35124	0.394802	1022.87	0.464363	0.429417	0.489926	0.394834	0.461349	0.456545	0.421683	0.463199	1069.06	0.425308	0.429934	0.410751	0.443971	0.442173	0.444506	0.464531	0.388288	0.273605	3.80302	-5.18135	21
3990	rpmB	b3637	236	1.58279	19067.1	12046.5	0.199491	0.346059	2387.74	0.408411	0.402366	0.403218	0.404638	0.421562	0.382477	0.411606	0.402573	933.527	0.521844	0.545213	0.489354	0.434295	0.499277	0.530147	0.459376	0.525561	915.135	0.36363	0.368484	0.356152	0.291932	0.368175	0.334526	0.335215	0.35679	0.253747	2.95302	-6.18135	217
3993	rph	b3643	686	1.39588	387.394	277.527	0.239929	0.386691	63.0524	0.425543	0.42557	0.418381	0.405452	0.392459	0.39276	0.418	0.428624	31.0974	0.534523	0.542607	0.524961	0.537387	0.511293	0.503689	0.519475	0.534442	30.8295	0.47273	0.482914	0.44028	0.447494	0.472501	0.446425	0.462833	0.468077	0.258504	4.34192	-6.18135	2939
4030	dnaA	b3702	1403	0.361721	104.651	289.314	0.292699	0.37779	42.052	0.470277	0.483695	0.44808	0.473543	0.498316	0.472235	0.507029	0.468487	23.4476	0.512674	0.502997	0.521234	0.467416	0.521637	0.478069	0.534216	0.512021	18.2009	0.494459	0.468153	0.449955	0.332421	0.437692	0.382408	0.420323	0.491622	0.226082	3.5578	-6.18135	11543
4044	glmU	b3730	1370	0.637746	387.116	607.006	0.238008	0.366635	98.0708	0.460158	0.462937	0.444957	0.507528	0.543496	0.513924	0.529826	0.45538	48.3967	0.513835	0.517538	0.50014	0.603617	0.53125	0.544892	0.596324	0.511123	19.0738	0.483932	0.46307	0.451404	0.537715	0.477584	0.493603	0.541891	0.477292	0.256583	4.51929	-3.28135	353
4045	atpC	b3731	419	0.290386	1093.48	3765.6	0.197693	0.38969	481.388	0.537581	0.546389	0.52191	0.507777	0.566439	0.520753	0.553856	0.531397	259.513	0.573565	0.565582	0.561309	0.557479	0.576141	0.543681	0.576945	0.566856	243.041	0.475732	0.471351	0.471201	0.44252	0.514541	0.486298	0.508361	0.465369	0.246251	4.66288	-9.48135	21
4046	atpD	b3732	1382	0.684969	2296.39	3352.55	0.182922	0.384653	328.524	0.448558	0.45602	0.441088	0.409885	0.476723	0.516928	0.45012	0.446944	243.731	0.511206	0.51907	0.498982	0.406198	0.524855	0.584458	0.482515	0.510439	179.922	0.441859	0.460781	0.423326	0.452447	0.490763	0.532845	0.478744	0.438507	0.296533	4.79051	-6.18135	27
4047	atpG	b3733	863	0.324838	865.096	2663.16	0.186469	0.394403	262.51	0.495008	0.488519	0.493625	0.338995	0.310752	0.373646	0.314003	0.505581	216.489	0.540022	0.54001	0.534058	0.3396	0.324554	0.391455	0.32928	0.556916	129.85	0.480364	0.492104	0.466548	0.275069	0.289682	0.359703	0.297389	0.493915	0.281154	3.70733	-10.0814	51
4048	atpA	b3734	1541	0.752104	2750.31	3656.82	0.189307	0.380785	440.254	0.455036	0.461317	0.4422	0.289877	0.307233	0.339845	0.302061	0.461131	305.394	0.544663	0.5338	0.554393	0.386681	0.387779	0.442618	0.389981	0.551555	131.978	0.458231	0.458561	0.455035	0.27766	0.309695	0.344027	0.309151	0.464229	0.279984	3.88942	-9.08135	13
4049	atpH	b3735	533	0.190202	736.299	3871.14	0.193806	0.385535	522.496	0.522118	0.541395	0.468246	0.509444	0.538853	0.542367	0.520361	0.517492	330.692	0.545495	0.569748	0.502893	0.505955	0.571771	0.563035	0.543053	0.541091	161.657	0.463086	0.474164	0.442748	0.376074	0.398306	0.429995	0.384007	0.470749	0.229896	4.43389	-13.2814	15
4050	atpF	b3736	470	0.228245	1173.6	5141.84	0.181447	0.358128	839.773	0.521423	0.549522	0.484497	0.458366	0.529608	0.565935	0.497928	0.51787	456.016	0.575025	0.600587	0.541284	0.50676	0.543652	0.606446	0.524828	0.575679	197.644	0.508851	0.534873	0.479118	0.409421	0.44531	0.52352	0.429241	0.512951	0.257937	4.32853	-6.18135	62
4051	atpE	b3737	239	1.79639	7167.81	3990.13	0.166157	0.365063	793.296	0.35541	0.353665	0.337783	0.318092	0.316215	0.346023	0.32057	0.344724	357.224	0.530341	0.596919	0.438258	0.485587	0.556928	0.594778	0.504699	0.486114	143.19	0.418852	0.468806	0.341188	0.353635	0.42344	0.475121	0.374568	0.382559	0.289701	3.01857	-6.18135	47
4052	atpB	b3738	815	0.426339	747.934	1754.32	0.251835	0.357104	304.809	0.480515	0.46706	0.490159	0.354681	0.456554	0.474487	0.401465	0.481594	171.803	0.571959	0.558059	0.578338	0.477445	0.537593	0.553343	0.500927	0.573985	118.429	0.481785	0.472475	0.490015	0.317257	0.430641	0.432599	0.401167	0.485289	0.254067	2.04448	-5.18135	9
4053	atpI	b3739	380	0.0189398	11.9586	631.404	0.332637	0.387553	112.801	0.537456	0.526177	0.487783	0.376643	0.401682	0.499949	0.390517	0.556961	65.4957	0.529378	0.540854	0.480369	0.492474	0.499469	0.518034	0.505347	0.532433	96.9744	0.49315	0.508035	0.475946	0.312911	0.372691	0.452911	0.346583	0.491725	0.198544	0.696372	-7.78135	617
4056	mioC	b3742	443	0.783819	248.097	316.524	0.273831	0.315643	71.6779	0.414315	0.467758	0.357056	0.492334	0.430669	0.449638	0.482737	0.411116	32.7585	0.512722	0.550228	0.462477	0.641051	0.52498	0.541823	0.582869	0.509983	47.4106	0.446768	0.48501	0.394418	0.574862	0.49211	0.474858	0.533767	0.438373	0.228951	5.29616	-7.78135	90
4065	ppiC	b3775	281	2.78728	559.486	200.728	0.269625	0.320712	64.1312	0.342845	0.308531	0.37572	0.337786	0.250071	0.293308	0.327167	0.368533	26.0913	0.439676	0.427035	0.449795	0.492701	0.382304	0.402315	0.476107	0.451764	28.373	0.390669	0.335041	0.44101	0.310341	0.281575	0.309774	0.324156	0.420292	0.250742	4.26194	-3.28135	438
4090	yihA	b3865	632	1.31143	323.36	246.57	0.291548	0.366503	57.5893	0.43545	0.424416	0.437531	0.426307	0.426726	0.431529	0.461394	0.436755	24.4146	0.563587	0.542996	0.569419	0.582184	0.55671	0.574768	0.626215	0.565115	20.466	0.445224	0.426079	0.465036	0.379002	0.42763	0.435968	0.440841	0.446402	0.26054	4.56737	-6.18135	3104
4123	rraA	b3929	485	0.564533	232.398	411.663	0.272715	0.381237	61.0926	0.488968	0.472912	0.501446	0.462594	0.441693	0.519522	0.472557	0.494563	31.4386	0.571001	0.550416	0.586789	0.5464	0.463995	0.55124	0.53353	0.585763	42.0066	0.468352	0.456278	0.477091	0.453247	0.391476	0.468178	0.454874	0.478604	0.249342	4.98807	0.318649	93
4131	metJ	b3938	317	1.74537	1146.84	657.078	0.240446	0.327823	148.393	0.395649	0.375221	0.414917	0.33899	0.352307	0.357356	0.343859	0.402873	65.559	0.493514	0.463799	0.522341	0.36992	0.37915	0.41161	0.365225	0.51384	20.2083	0.439564	0.417693	0.455572	0.365525	0.384962	0.402375	0.391504	0.439768	0.245258	5.02367	-5.18135	8645
4141	trmA	b3965	1100	1.15225	182.089	158.029	0.317306	0.3522	40.2979	0.449181	0.439098	0.449628	0.464897	0.414975	0.424461	0.446839	0.45128	15.8824	0.554641	0.561465	0.541275	0.598589	0.522733	0.527125	0.587235	0.556255	16.2876	0.485284	0.479688	0.464861	0.445929	0.400952	0.462356	0.437246	0.489566	0.245043	4.23561	-5.18135	10806
4240	rsgA	b4161	1052	0.722843	145.256	200.951	0.291295	0.378175	36.0123	0.467388	0.477375	0.435712	0.461404	0.465271	0.425408	0.464521	0.463526	16.7634	0.558303	0.542187	0.560672	0.542035	0.509618	0.465071	0.54394	0.562514	17.2366	0.471526	0.442019	0.469879	0.359703	0.378908	0.365152	0.364539	0.478233	0.255444	4.12005	-7.78135	1419
4256	ppa	b4226	530	1.85231	4716.77	2546.43	0.178914	0.301057	624.313	0.382095	0.379867	0.374257	0.35365	0.37083	0.37396	0.350618	0.382395	254.417	0.473481	0.447857	0.490339	0.385991	0.4252	0.435104	0.399549	0.478202	78.6766	0.386096	0.341764	0.423083	0.272831	0.298747	0.33193	0.272538	0.393531	0.268385	4.73843	-6.08135	4959
4258	yjgA	b4234	551	0.607163	245.857	404.928	0.233711	0.342178	91.0362	0.434095	0.440559	0.427296	0.468998	0.411277	0.391032	0.447016	0.433985	37.3621	0.525038	0.513968	0.528848	0.653144	0.553785	0.484968	0.60644	0.518399	48.2625	0.457467	0.463924	0.447161	0.452441	0.407486	0.426763	0.445916	0.455549	0.267283	5.89227	-9.98135	2035
4264	yjgF	b4243	386	2.29641	1554.75	677.035	0.185341	0.316373	119.721	0.376282	0.360891	0.38716	0.307976	0.2931	0.353918	0.323718	0.380877	47.4902	0.451035	0.443891	0.457404	0.438189	0.403586	0.454142	0.448114	0.449888	51.7423	0.354956	0.362656	0.336591	0.316888	0.254198	0.340006	0.315567	0.369098	0.290962	4.07787	-8.68135	73
4274	pepA	b4260	1511	0.785581	273.74	348.456	0.267865	0.406585	45.1098	0.462065	0.446652	0.452915	0.30649	0.35163	0.415474	0.359729	0.465267	22.7362	0.55512	0.542721	0.563517	0.392483	0.454862	0.506091	0.441585	0.557416	21.9804	0.456983	0.426307	0.478395	0.314108	0.352976	0.353541	0.363733	0.458919	0.246258	3.8998	-8.98135	2610
4353	arcA	b4401	716	0.976942	548.289	561.23	0.23319	0.342025	120.794	0.43154	0.400798	0.454091	0.283117	0.320372	0.372472	0.293293	0.441156	50.9534	0.510747	0.486237	0.532013	0.372519	0.41065	0.441504	0.402608	0.519228	72.8544	0.443676	0.43709	0.447509	0.199139	0.287486	0.390999	0.265169	0.456073	0.273854	4.56591	-4.98135	NA
