# Supplementary figures and images for: Operon mRNAs are organized into ORF-centric structures that predict translation efficiency
Source: eLife journal article supplement (doi:10.7554/elife.22037), 2017-01-31

Figure 3 - figure supplement 1

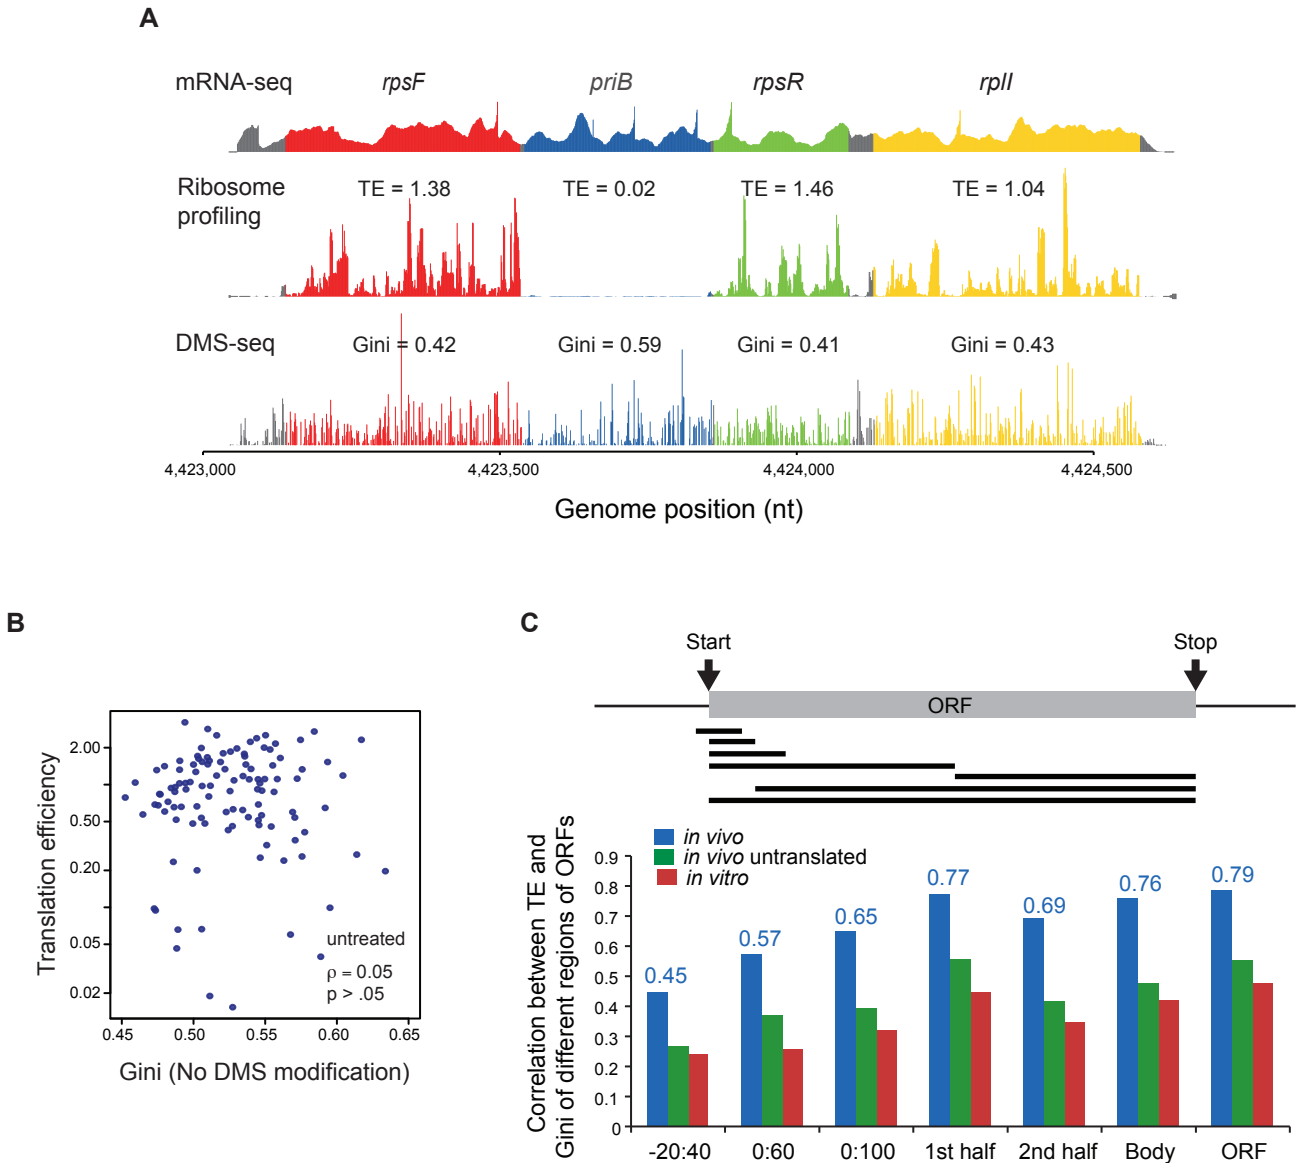

Supplement: supp [file elife-22037-supp-v1.zip › elife_poa_e22037_Figure_3_figure_supplement_1.pdf]

Figure 6 - figure supplement 1

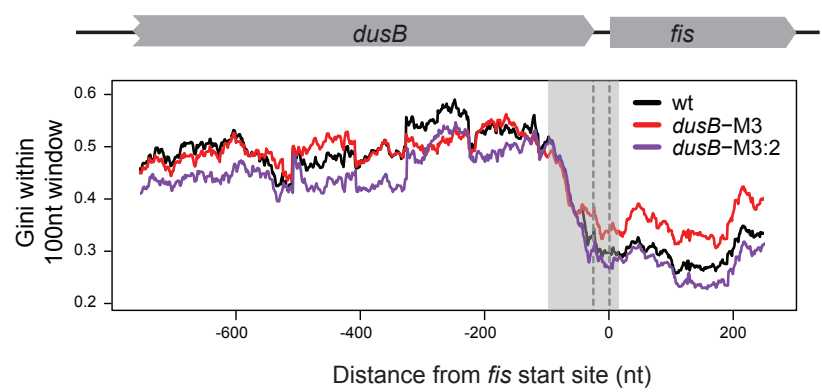

Supplement: supp [file elife-22037-supp-v1.zip › elife_poa_e22037_Figure_6_figure_supplement_1.pdf]

Figure 5 - figure supplement 1

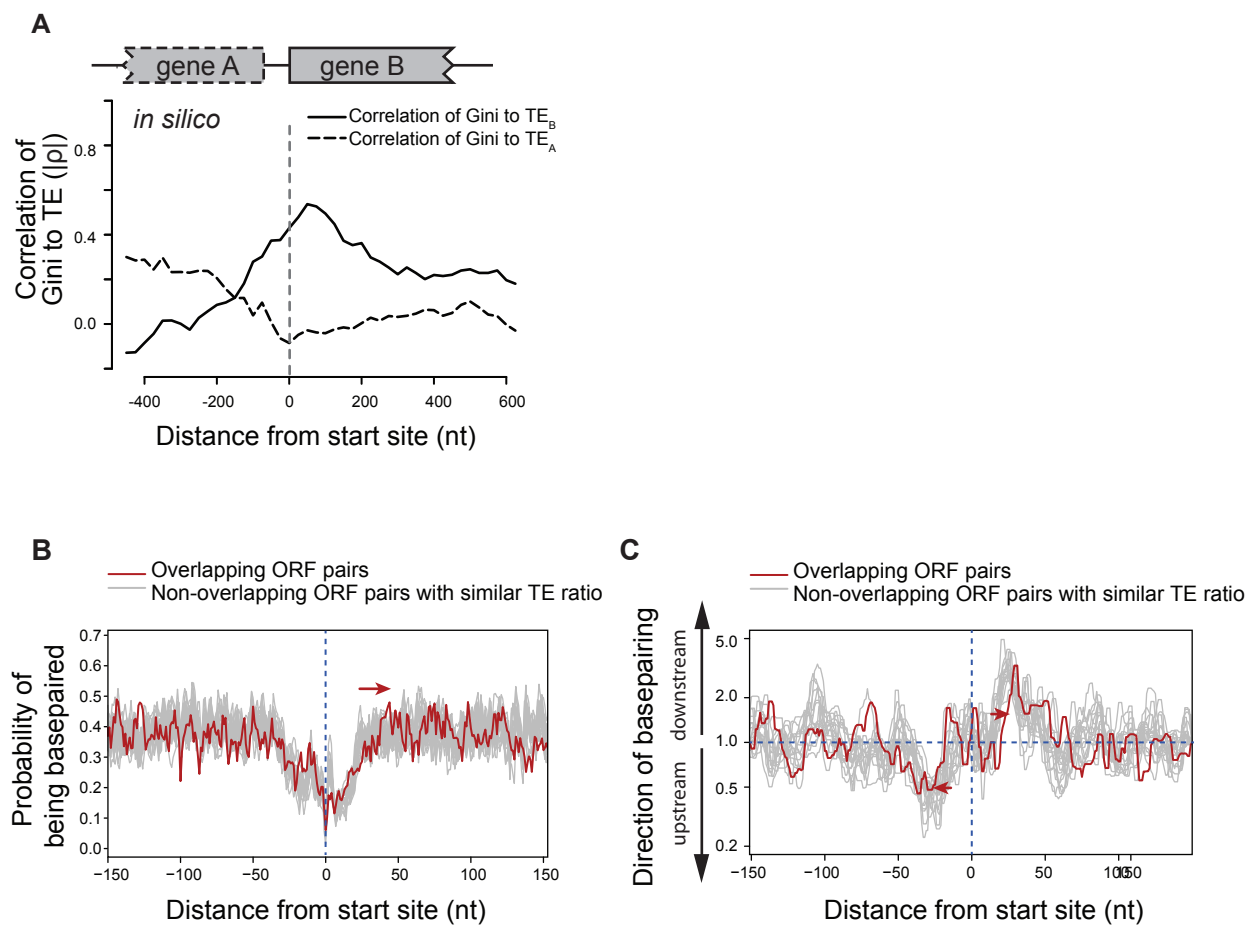

Supplement: supp [file elife-22037-supp-v1.zip › elife_poa_e22037_Figure_5_figure_supplement_1.pdf]

Figure 2 - figure supplement 1

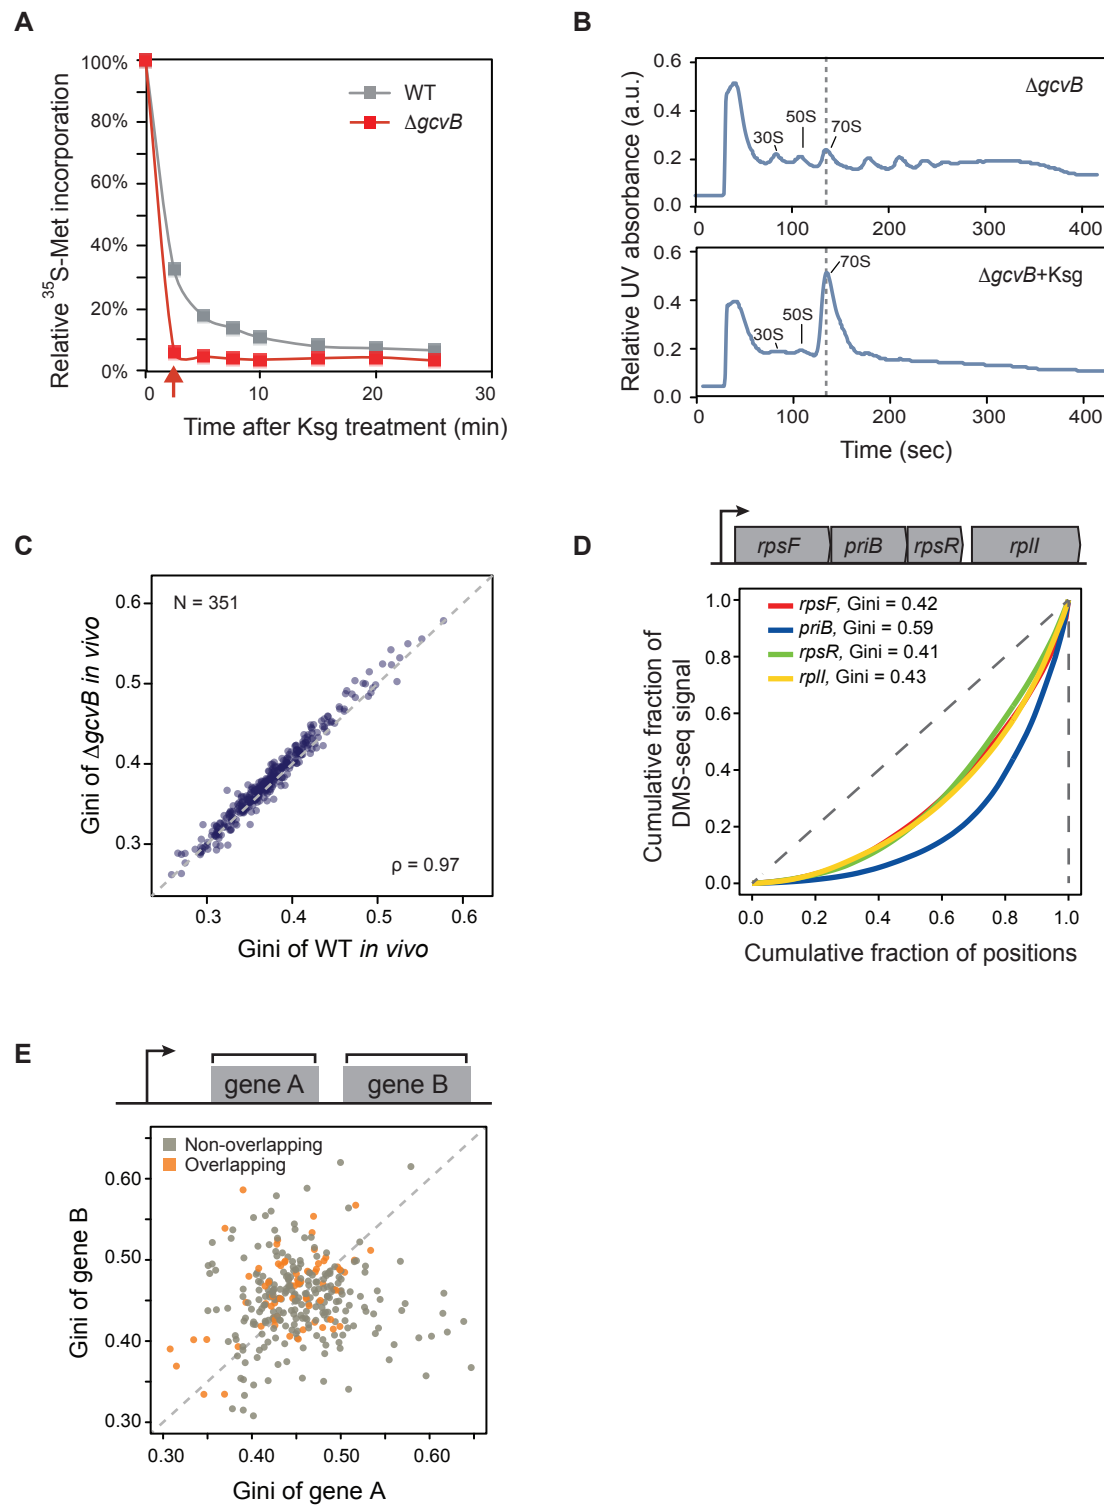

Supplement: supp [file elife-22037-supp-v1.zip › elife_poa_e22037_Figure_2_figure_supplement_1.pdf]

Figure 4 - figure supplement 1

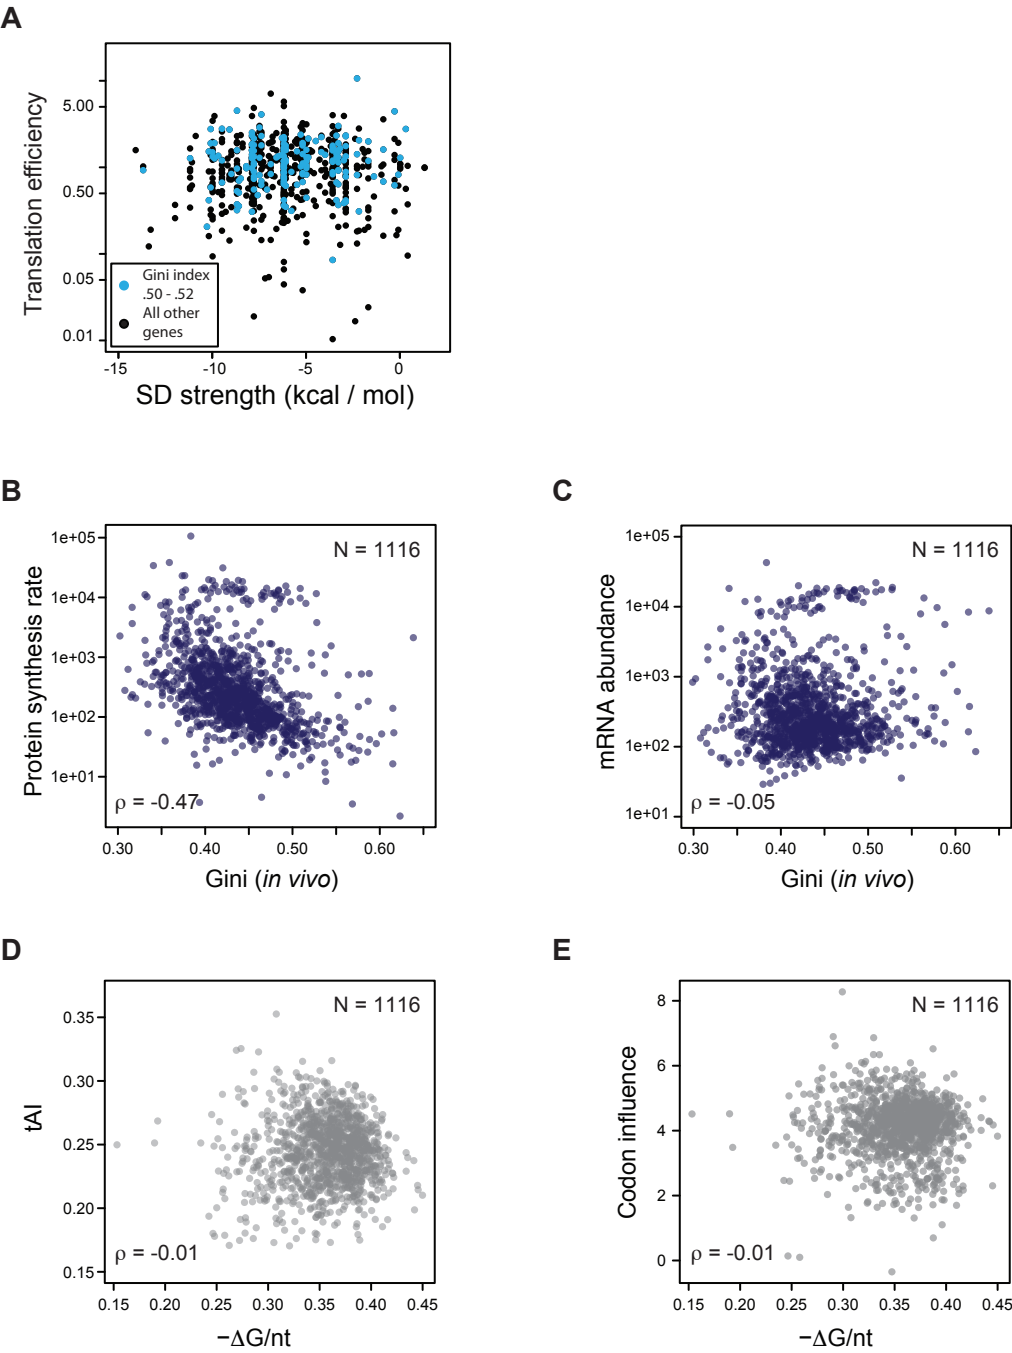

Supplement: supp [file elife-22037-supp-v1.zip › elife_poa_e22037_Figure_4_figure_supplement_1.pdf]
